# Supplementary material for: Quantitative Proteomic Profiling of Mitochondrial Toxicants in a Human Cardiomyocyte Cell Line
Source: Front Genet. 2020 Jul 7;11:719. doi: 10.3389/fgene.2020.00719 (PMC7358379; doi:10.3389/fgene.2020.00719)
Supplement: TABLE S1 — Compiled information for protein identifications. Accession number, statistical information, sequence coverage and protein annotation information are included. [file Table_1.xlsx]

## Sheet: Supplemental Table 1 
Supplemental Table 1. Compiled information for protein identifications. Accession number, statistical information, sequence coverage and protein annotation information are included.
	Protein identification and accession information								Protein expression level of 18 samples (triplicates of treatment groups and DMSO negative control)																			Average of protein expression level							Statistical information
sort-ID	Accession	SP	GeneSymbol	Short Name	# AAs	MW [kDa]	calc. pI		FCCP1	FCCP2	FCCP3	Dinoterb1	Dinoterb3	Dinoterb2	Picoxystrobin1	Picoxystrobin2	Picoxystrobin3	Pinacyanol1	Pinacyanol2	Pinacyanol3	Triclocarban1	Triclocarban2	Triclocarban3	DMSO1	DMSO2	DMSO3		FCCP(Ave)	Dinoterb(Ave)	Picoxystrobin(Ave)	Pinacyanol(Ave)	Triclocarban(Ave)	DMSO(Ave)		Ratio (FCCP/DMSO)	Power value FCCP	T-test p-value Ratio (F/DMSO)	log2-Ratio (FCCP/DMSO)	log10-TTEST-Ratio (FCCP/DMSO)	Ratio(Dinoterb/DMSO)	Power value Dinoterb	T-test-Ratio (Dinoterb/DMSO)	log2-Ratio (Dinoterb/DMSO)	log10-TTEST-Ratio (Dinoterb/DMSO)	Ratio (Picxystrobin/DMSO)	Power value Picoxystrobin	T-test-Ratio (Picxystrobin/DMSO)	log2-Ratio (Picxystrobin/DMSO)	log10-TTEST-Ratio (Picxystrobin/DMSO)
1	46397333	P60709	ACTB	Actin, cytoplasmic 1	375	41.7	5.48		1.005	1.002	0.997	1.008	0.953	0.99	1.03	1.026	1.03	1.03	1.02	1.01	1.03	0.997	1.045	0.996	0.995	0.959		1.001	0.984	1.029	1.02	1.024	0.983		1.02	0.278539	0.23	0.03	0.64	1	0.0502597	0.99	0	0	1.05	0.922581	0.02	0.06	1.67
2	54036697	P68032	ACTC	Actin, alpha cardiac muscle 1	377	42	5.39		0.733	0.751	0.749	0.9	0.594	1.107	0.788	1.07	0.885	1.035	1.038	0.967	1.042	1.14	1.073	1.073	1.043	1.133		0.744	0.867	0.914	1.013	1.085	1.083		0.69	1	0	-0.54	3.63	0.8	0.27086	0.23	-0.32	0.64	0.84	0.443536	0.12	-0.24	0.91
3	88984001	Q92747	ARC1A	Actin-related protein 2/3 complex subunit 1A	370	41.5	8.18		0.826	0.955	0.953	0.962	1.179	0.972	0.984	0.958	0.952	0.882	0.89	0.843	0.886	1.084	0.888	0.988	0.872	1.354		0.911	1.038	0.965	0.872	0.953	1.071		0.85	0.171613	0.35	-0.23	0.46	0.97	0.054452	0.85	-0.05	0.07	0.9	0.107319	0.51	-0.15	0.3
4	3121763	O15143	ARC1B	Actin-related protein 2/3 complex subunit 1B	372	40.9	8.35		1.118	1.041	1.014	1.022	1.126	0.968	1.083	0.999	1.074	0.956	0.985	0.992	1.021	1.005	0.973	0.985	0.953	1.013		1.058	1.039	1.052	0.978	1	0.984		1.08	0.489409	0.11	0.1	0.97	1.06	0.184461	0.33	0.08	0.49	1.07	0.512354	0.1	0.1	1.02
5	47117648	P61160	ARP2	Actin-related protein 2	394	44.7	6.74		0.982	0.961	0.98	0.978	0.866	0.987	0.972	0.997	0.992	0.958	0.959	0.972	1.02	1.031	1.006	0.985	0.99	1.028		0.974	0.944	0.987	0.963	1.019	1.001		0.97	0.386876	0.15	-0.04	0.83	0.94	0.257619	0.24	-0.09	0.63	0.99	0.137705	0.41	-0.02	0.39
6	47117647	P61158	ARP3	Actin-related protein 3	418	47.3	5.88		1.01	0.975	0.977	1.001	0.995	1.022	0.952	0.974	0.987	0.975	1.013	0.986	0.97	1.042	0.999	0.998	0.954	1.004		0.987	1.006	0.971	0.991	1.004	0.985		1	0.0511301	0.92	0	0.04	1.02	0.202273	0.3	0.03	0.52	0.99	0.110096	0.49	-0.02	0.31
7	3121764	O15144	ARPC2	Actin-related protein 2/3 complex subunit 2	300	34.3	7.36		0.908	0.959	0.984	1.008	0.804	1.01	0.96	1.023	0.974	0.968	0.988	0.996	1.019	1.064	1.045	1.005	0.956	1.142		0.95	0.941	0.986	0.984	1.043	1.034		0.92	0.262801	0.23	-0.12	0.63	0.91	0.171215	0.35	-0.14	0.46	0.95	0.122104	0.45	-0.07	0.34
8	3121765	O15145	ARPC3	Actin-related protein 2/3 complex subunit 3	178	20.5	8.59		0.927	1.011	1.007	1.058	0.81	1.065	1.036	1.05	1.107	0.976	1.092	0.927	0.916	0.956	0.955	1.049	0.966	1.004		0.981	0.978	1.065	0.999	0.942	1.006		0.98	0.100979	0.53	-0.04	0.27	0.97	0.0610184	0.76	-0.04	0.12	1.06	0.400606	0.15	0.08	0.84
9	38372625	P59998	ARPC4	Actin-related protein 2/3 complex subunit 4	168	19.7	8.43		0.955	0.998	1.02	1.022	0.879	0.993	0.967	0.988	1.008	0.956	1.008	1.033	0.999	1.008	1.005	0.956	0.971	0.956		0.991	0.965	0.988	0.999	1.004	0.961		1.03	0.299604	0.21	0.04	0.68	1	0.0508836	0.94	0.01	0.03	1.03	0.498537	0.11	0.04	0.97
10	3121767	O15511	ARPC5	Actin-related protein 2/3 complex subunit 5	151	16.3	5.67		1.065	0.967	1.063	1.073	1.053	0.985	1.006	0.925	0.968	0.943	0.892	0.887	0.939	1.079	1.014	1.018	0.795	1.466		1.032	1.037	0.966	0.907	1.011	1.093		0.94	0.0599496	0.77	-0.08	0.11	0.95	0.0584526	0.79	-0.08	0.1	0.88	0.0940603	0.56	-0.18	0.25
11	125969	P08865	RSSA	40S ribosomal protein SA	295	32.8	4.87		1.009	0.985	1.033	1.051	0.951	1.038	0.928	1.021	1.035	1.015	1.016	1.008	1.045	0.976	1.019	0.968	1.021	0.967		1.009	1.013	0.994	1.013	1.013	0.985		1.02	0.172937	0.34	0.03	0.46	1.03	0.115108	0.48	0.04	0.32	1.01	0.0559815	0.82	0.01	0.09
12	1710756	P15880	RS2	40S ribosomal protein S2	293	31.3	10.24		0.887	0.972	0.997	1.04	0.75	1.064	0.948	1.024	0.989	0.949	0.961	0.985	0.983	1.079	0.997	1.052	0.962	1.165		0.952	0.951	0.987	0.965	1.02	1.06		0.9	0.325094	0.19	-0.15	0.73	0.9	0.144718	0.41	-0.16	0.39	0.93	0.197656	0.31	-0.1	0.5
13	417719	P23396	RS3	40S ribosomal protein S3	243	26.7	9.66		0.904	0.949	0.992	0.998	0.762	1.036	0.909	1.007	0.982	0.951	0.979	0.979	0.995	1.072	1	1.051	0.991	1.093		0.948	0.932	0.966	0.97	1.022	1.045		0.91	0.631647	0.07	-0.14	1.17	0.89	0.219096	0.28	-0.17	0.55	0.92	0.425125	0.13	-0.11	0.89
14	47117764	P61247	RS3A	40S ribosomal protein S3a	264	29.9	9.73		0.849	0.962	0.98	1.046	0.743	1.051	0.936	0.982	0.994	0.93	0.952	0.959	0.993	1.094	1.001	1.081	0.992	1.179		0.93	0.947	0.97	0.947	1.03	1.084		0.86	0.558395	0.09	-0.22	1.07	0.87	0.203838	0.3	-0.2	0.52	0.9	0.464856	0.12	-0.16	0.94
15	50403628	P62701	RS4X	40S ribosomal protein S4, X isoform	263	29.6	10.15		0.939	0.978	0.998	1.045	0.68	1.057	0.933	0.98	1.003	0.99	1.01	1.011	1.028	1.049	1.028	1.034	1.013	1.094		0.971	0.928	0.972	1.003	1.035	1.047		0.93	0.651872	0.06	-0.11	1.19	0.89	0.146834	0.4	-0.17	0.4	0.93	0.587661	0.08	-0.11	1.1
16	22002064	P46782	RS5	40S ribosomal protein S5	204	22.9	9.72		0.931	1.004	1.005	1.026	0.749	1.075	0.961	1.04	1.001	1	1.003	0.997	1.056	1.054	1.093	1.045	1.003	0.981		0.98	0.95	1.001	1	1.068	1.01		0.97	0.152719	0.39	-0.04	0.41	0.94	0.0863786	0.59	-0.09	0.23	0.99	0.0599218	0.78	-0.01	0.11
17	51338632	P62753	RS6	40S ribosomal protein S6	249	28.7	10.84		0.936	0.938	1.004	1.027	0.775	1.043	0.885	0.997	0.953	0.981	1.003	1.007	1.052	1.05	1.075	1.006	1.02	0.938		0.959	0.948	0.945	0.997	1.059	0.988		0.97	0.130002	0.44	-0.04	0.35	0.96	0.0709896	0.68	-0.06	0.16	0.96	0.168206	0.36	-0.06	0.45
18	49065831	P62081	RS7	40S ribosomal protein S7	194	22.1	10.1		0.99	1.004	1.018	1.008	0.844	1.013	0.966	0.946	0.979	0.995	1.03	0.996	1.02	0.986	1.033	0.98	1.027	0.948		1.004	0.955	0.964	1.007	1.013	0.985		1.02	0.116061	0.48	0.03	0.32	0.97	0.0767841	0.65	-0.04	0.19	0.98	0.127334	0.44	-0.03	0.36
19	50403622	P62241	RS8	40S ribosomal protein S8	208	24.2	10.32		0.974	0.972	0.993	1.013	0.853	1.075	0.93	0.993	0.978	0.983	1.028	1	1.031	1.042	1.042	1.024	1.016	0.984		0.98	0.98	0.967	1.004	1.038	1.008		0.97	0.466081	0.11	-0.04	0.94	0.97	0.0685735	0.71	-0.04	0.15	0.96	0.397634	0.15	-0.06	0.83
20	20178311	P46781	RS9	40S ribosomal protein S9	194	22.6	10.65		0.897	0.978	1.04	1.025	0.831	1.074	0.923	0.969	0.967	0.884	0.985	0.974	1	1.023	0.987	0.983	0.949	1.053		0.972	0.977	0.953	0.948	1.003	0.995		0.98	0.0713958	0.68	-0.03	0.17	0.98	0.0553677	0.83	-0.03	0.08	0.96	0.215205	0.29	-0.06	0.54
21	1173177	P46783	RS10	40S ribosomal protein S10	165	18.9	10.15		0.944	0.989	1.019	1.038	0.793	1.027	0.926	0.962	0.983	0.954	0.975	0.979	1.007	1.034	0.992	1.029	0.982	1.033		0.984	0.953	0.957	0.969	1.011	1.015		0.97	0.190859	0.32	-0.04	0.49	0.94	0.112536	0.49	-0.09	0.31	0.94	0.630782	0.07	-0.08	1.16
22	50403609	P62280	RS11	40S ribosomal protein S11	158	18.4	10.3		0.963	1.002	1.013	1.02	0.842	1.052	0.976	0.985	0.986	0.975	1.039	1.021	1.06	0.994	1.043	0.986	1.024	0.951		0.993	0.971	0.982	1.011	1.032	0.987		1.01	0.0556974	0.84	0.01	0.08	0.98	0.0557999	0.83	-0.02	0.08	1	0.0558722	0.84	-0.01	0.08
23	224471878	P25398	RS12	40S ribosomal protein S12	132	14.5	7.21		0.849	0.945	0.977	1.028	0.684	1.032	0.873	0.965	0.959	0.934	0.925	0.929	0.986	1.144	0.992	1.08	0.959	1.278		0.924	0.915	0.933	0.929	1.04	1.106		0.84	0.395526	0.14	-0.26	0.84	0.83	0.230859	0.27	-0.27	0.57	0.84	0.382943	0.15	-0.25	0.82
24	50403608	P62277	RS13	40S ribosomal protein S13	151	17.2	10.54		0.91	0.988	1.028	1.067	0.871	1.081	0.946	1.014	0.958	0.947	0.986	0.958	1.003	1.01	0.97	1.034	0.94	0.984		0.975	1.006	0.973	0.964	0.995	0.986		0.99	0.0566671	0.82	-0.02	0.09	1.02	0.0580126	0.79	0.03	0.1	0.99	0.0653791	0.72	-0.02	0.14
25	50403752	P62263	RS14	40S ribosomal protein S14	151	16.3	10.05		1	0.974	1.028	1.001	1.074	0.992	0.972	0.953	0.982	1.03	1.015	1.007	1.049	0.987	1.065	1.005	1.037	0.945		1.001	1.022	0.969	1.018	1.034	0.996		1	0.0527477	0.88	0.01	0.05	1.03	0.102107	0.52	0.04	0.29	0.97	0.149131	0.39	-0.04	0.4
26	51338641	P62841	RS15	40S ribosomal protein S15	145	17	10.39		0.894	0.941	0.994	1.064	0.692	1.051	0.92	1.077	1.026	0.826	0.904	0.952	0.979	1.108	0.962	1.091	0.945	1.255		0.943	0.936	1.008	0.894	1.016	1.097		0.86	0.337238	0.18	-0.22	0.75	0.85	0.173375	0.35	-0.23	0.46	0.92	0.134666	0.42	-0.12	0.37
27	50403624	P62244	RS15A	40S ribosomal protein S15a	130	14.8	10.13		0.809	0.908	0.902	1.016	0.554	1.099	0.865	1.036	0.898	0.928	0.91	0.92	0.933	1.124	1.031	1.095	0.898	1.381		0.873	0.89	0.933	0.92	1.029	1.124		0.78	0.373611	0.16	-0.36	0.81	0.79	0.173166	0.35	-0.34	0.46	0.83	0.227215	0.27	-0.27	0.57
28	50403607	P62249	RS16	40S ribosomal protein S16	146	16.4	10.21		0.907	0.94	0.972	1.007	0.778	1.028	0.911	0.975	0.952	0.997	1.005	1.019	1.032	1.04	1.059	1.072	1.014	1.053		0.94	0.938	0.946	1.007	1.043	1.046		0.9	0.9619	0.01	-0.16	1.87	0.9	0.239278	0.26	-0.16	0.59	0.9	0.943105	0.02	-0.15	1.78
29	133825	P08708	RS17	40S ribosomal protein S17	135	15.5	9.85		0.966	0.993	1	1.04	0.805	0.981	0.949	0.958	0.995	0.966	0.974	0.981	1.011	1.061	0.995	1.027	1.03	1.101		0.986	0.942	0.967	0.974	1.022	1.053		0.94	0.651145	0.06	-0.09	1.19	0.89	0.289353	0.21	-0.16	0.68	0.92	0.80065	0.04	-0.12	1.43
30	50403625	P62269	RS18	40S ribosomal protein S18	152	17.7	10.99		0.886	0.946	1.002	1.046	0.696	1.029	0.919	0.978	0.996	0.948	0.978	0.989	1.012	1.098	1.009	1.058	0.995	1.169		0.945	0.924	0.964	0.972	1.04	1.074		0.88	0.504558	0.1	-0.18	1	0.86	0.207395	0.29	-0.22	0.53	0.9	0.450913	0.12	-0.16	0.91
31	730640	P39019	RS19	40S ribosomal protein S19	145	16.1	10.32		0.979	0.993	1.01	1.007	0.857	1.042	0.969	0.977	0.966	0.973	0.983	1.009	1.011	1.019	1.027	1.011	0.979	0.923		0.994	0.969	0.971	0.988	1.019	0.971		1.02	0.127353	0.43	0.03	0.36	1	0.0501098	0.98	0	0.01	1	0.05	1	0	0
32	46397703	P60866	RS20	40S ribosomal protein S20	119	13.4	9.94		0.961	0.944	1.01	1.065	0.799	1.033	0.942	1.014	0.993	0.971	0.968	0.981	1.006	1.011	1	1.009	0.964	1.06		0.972	0.965	0.983	0.974	1.006	1.011		0.96	0.192766	0.32	-0.06	0.5	0.96	0.0791564	0.63	-0.07	0.2	0.97	0.119272	0.47	-0.04	0.33
33	52783792	P63220	RS21	40S ribosomal protein S21	83	9.1	8.5		1.028	0.991	0.987	0.999	1.216	0.999	0.925	0.95	0.956	1.007	1.002	1.045	0.983	0.961	1.014	0.968	0.983	0.931		1.002	1.071	0.943	1.018	0.986	0.961		1.04	0.472226	0.11	0.06	0.96	1.11	0.2892	0.21	0.16	0.68	0.98	0.157162	0.39	-0.03	0.41
34	50403755	P62266	RS23	40S ribosomal protein S23	143	15.8	10.49		0.991	1.008	1.042	1.033	0.816	1.059	0.925	1.007	1.003	0.978	1.048	1.073	1.074	1.016	1.086	0.999	1.028	0.895		1.014	0.969	0.978	1.033	1.059	0.974		1.04	0.143713	0.41	0.06	0.39	1	0.0503521	0.96	-0.01	0.02	1	0.0507278	0.93	0.01	0.03
35	51338645	P62847	RS24	40S ribosomal protein S24	133	15.4	10.78		0.971	1.015	1.03	1.027	0.888	1	0.943	0.95	0.95	0.921	1.013	1.002	1.005	1.032	1.05	0.975	0.993	0.989		1.005	0.971	0.948	0.979	1.029	0.986		1.02	0.164466	0.36	0.03	0.45	0.99	0.0630783	0.76	-0.02	0.12	0.96	0.99982	0	-0.06	2.46
36	51338648	P62851	RS25	40S ribosomal protein S25	125	13.7	10.11		1.006	1.037	1.017	1.01	0.942	0.984	0.964	0.966	0.972	0.94	0.997	0.998	1.039	1.075	1.026	1.014	0.99	1.027		1.02	0.979	0.967	0.978	1.047	1.011		1.01	0.0937175	0.54	0.01	0.27	0.97	0.267813	0.23	-0.05	0.64	0.96	0.944648	0.02	-0.06	1.75
37	51338650	P62854	RS26	40S ribosomal protein S26	115	13	11		0.857	0.957	0.945	1.008	0.789	1.049	0.888	1.007	0.941	0.923	0.989	0.962	1.062	1.161	1.073	1.114	1.041	1.522		0.92	0.949	0.945	0.958	1.099	1.225		0.75	0.460594	0.12	-0.41	0.93	0.77	0.332747	0.18	-0.37	0.75	0.77	0.400553	0.14	-0.37	0.85
38	1171014	P42677	RS27	40S ribosomal protein S27	84	9.5	9.45		0.898	1.056	1.062	1.147	0.732	1.285	1.111	1.116	1.04	0.995	0.852	0.876	0.985	1.282	1.097	1.077	0.908	1.355		1.005	1.055	1.089	0.907	1.121	1.113		0.9	0.113551	0.49	-0.15	0.31	0.95	0.0580576	0.79	-0.08	0.1	0.98	0.0534941	0.86	-0.03	0.06
39	51316258	Q71UM5	RS27L	40S ribosomal protein S27-like	84	9.5	9.45		0.903	0.883	0.639	0.858	1.141	0.973	0.832	0.898	0.792	0.952	0.87	0.813	1.084	0.967	1.187	0.871	0.972	0.703		0.808	0.991	0.841	0.878	1.079	0.849		0.95	0.0634661	0.74	-0.07	0.13	1.17	0.220081	0.28	0.22	0.55	0.99	0.0509593	0.93	-0.01	0.03
40	302393745	P62979	RS27A	Ubiquitin-40S ribosomal protein S27a	156	18	9.64		1.009	0.975	1.01	1.023	1.005	1.037	0.887	0.951	0.988	0.973	1.015	1.004	1.041	1.047	1.075	1.044	1.02	0.896		0.998	1.021	0.942	0.997	1.054	0.987		1.01	0.0557777	0.83	0.02	0.08	1.03	0.107094	0.5	0.05	0.3	0.95	0.123822	0.46	-0.07	0.34
41	51338652	P62857	RS28	40S ribosomal protein S28	69	7.8	10.7		1.038	1.026	1.08	1.075	0.907	1.02	0.937	0.942	1.018	1.006	1.039	1.034	1.006	1.034	1	0.988	0.955	0.949		1.048	1	0.965	1.026	1.013	0.964		1.09	0.957971	0.02	0.12	1.82	1.04	0.104014	0.52	0.05	0.29	1	0.0501278	0.97	0	0.01
42	50403626	P62273	RS29	40S ribosomal protein S29	56	6.7	10.13		1.162	0.928	1.063	0.959	1.997	0.89	1.059	0.951	0.886	0.942	0.905	0.921	0.985	1.215	0.963	1.123	0.978	1.304		1.051	1.282	0.965	0.922	1.054	1.135		0.93	0.106535	0.51	-0.11	0.29	1.13	0.0668817	0.71	0.18	0.15	0.85	0.321748	0.19	-0.23	0.73
43	51338655	P62861	RS30	40S ribosomal protein S30	59	6.6	12.15		0.982	1.002	1.145	1.084	1.205	1.094	0.777	0.91	0.914	0.722	1.207	1.153	1.156	1.039	1.182	0.801	1.063	0.587		1.043	1.128	0.867	1.027	1.126	0.817		1.28	0.305322	0.2	0.35	0.7	1.38	0.524564	0.1	0.47	1.02	1.06	0.0627521	0.75	0.09	0.13
44	730565	P39023	RL3	60S ribosomal protein L3	403	46.1	10.18		0.999	1.011	1.032	1.035	0.999	1.019	0.952	0.981	0.973	0.968	1.024	1.009	1.033	1.023	1.016	1.014	1.02	0.994		1.014	1.018	0.969	1	1.024	1.009		1	0.0673017	0.73	0.01	0.13	1.01	0.101388	0.55	0.01	0.26	0.96	0.873124	0.03	-0.06	1.6
45	22002063	P36578	RL4	60S ribosomal protein L4	427	47.7	11.06		1.002	1.038	1.057	1.058	1.011	1.047	0.876	0.973	0.994	0.863	1.029	1.033	1.06	1.044	1.087	0.951	1.041	0.906		1.033	1.039	0.948	0.975	1.064	0.966		1.07	0.313496	0.2	0.1	0.71	1.08	0.369152	0.16	0.1	0.8	0.98	0.0619661	0.75	-0.03	0.12
46	81175191	P46777	RL5	60S ribosomal protein L5	297	34.3	9.72		0.988	0.982	0.967	0.996	0.883	1.019	0.916	0.943	0.95	1.039	1.023	1.012	1.032	1.021	1.044	1.034	1.017	1.002		0.979	0.966	0.936	1.025	1.033	1.018		0.96	0.885517	0.03	-0.06	1.58	0.95	0.209028	0.3	-0.08	0.53	0.92	0.999244	0	-0.12	2.35
47	1350762	Q02878	RL6	60S ribosomal protein L6	288	32.7	10.58		0.964	1.053	1.047	1.084	1.056	1.111	0.783	0.974	0.934	0.801	1.048	1.059	1.101	1.042	1.106	0.882	0.981	0.898		1.021	1.084	0.897	0.969	1.083	0.921		1.11	0.595649	0.08	0.15	1.12	1.18	0.986674	0.01	0.24	2.04	0.97	0.0642571	0.74	-0.04	0.13
48	133021	P18124	RL7	60S ribosomal protein L7	248	29.2	10.65		0.976	1.011	1.024	1.039	0.901	1.034	0.935	0.987	0.987	0.928	1.014	1.032	1.02	1.051	0.997	1.003	1.01	1.029		1.004	0.991	0.969	0.991	1.022	1.014		0.99	0.0905414	0.55	-0.02	0.26	0.98	0.0770234	0.64	-0.03	0.19	0.96	0.592137	0.08	-0.07	1.11
49	52783289	Q6DKI1	RL7L	60S ribosomal protein L7-like 1	246	28.6	10.51		0.975	0.998	1.03	1.045	0.741	0.985	0.979	0.979	0.954	1.022	1.011	1.016	1.044	1.08	1.019	1.154	1.076	1.123		1.001	0.924	0.971	1.016	1.048	1.118		0.9	0.964704	0.01	-0.16	1.87	0.83	0.472372	0.11	-0.28	0.95	0.87	0.999544	0	-0.2	2.43
50	54039239	P62424	RL7A	60S ribosomal protein L7a	266	30	10.61		1.027	1.031	1.008	0.993	1.082	0.99	0.954	0.963	0.97	0.98	1.052	0.998	1.046	0.957	1.02	0.978	1.034	0.913		1.022	1.022	0.962	1.01	1.008	0.975		1.05	0.238766	0.26	0.07	0.59	1.05	0.162689	0.37	0.07	0.43	0.99	0.0645429	0.74	-0.02	0.13
51	51702823	P62917	RL8	60S ribosomal protein L8	257	28	11.03		0.891	0.963	0.966	0.996	0.832	1.021	0.922	0.973	0.937	0.962	0.99	1.002	0.981	1.022	0.984	1.029	0.978	1.059		0.94	0.95	0.944	0.984	0.996	1.022		0.92	0.605194	0.07	-0.12	1.14	0.93	0.188648	0.32	-0.11	0.5	0.92	0.722435	0.05	-0.11	1.31
52	417677	P32969	RL9	60S ribosomal protein L9	192	21.8	9.95		0.889	0.938	0.961	0.975	0.766	1.02	0.923	0.989	0.929	0.986	0.982	1	0.988	1.082	1.003	1.055	1	1.02		0.929	0.92	0.947	0.989	1.024	1.025		0.91	0.902323	0.02	-0.14	1.65	0.9	0.237891	0.26	-0.16	0.59	0.92	0.767936	0.04	-0.11	1.38
53	148887414	P27635	RL10	60S ribosomal protein L10	214	24.6	10.08		1.021	1.025	1.035	1.03	0.894	1.038	0.929	0.959	0.95	0.977	1.018	1.001	1.02	0.991	1.024	0.996	1.019	0.98		1.027	0.987	0.946	0.999	1.012	0.998		1.03	0.604192	0.08	0.04	1.12	0.99	0.0555879	0.83	-0.02	0.08	0.95	0.903509	0.02	-0.08	1.62
54	51702773	P62906	RL10A	60S ribosomal protein L10a	217	24.8	9.94		0.959	0.957	0.998	1.028	0.776	1.033	0.913	0.987	0.967	0.962	0.973	0.982	1.019	1.062	0.985	1.058	1.009	1.068		0.971	0.946	0.956	0.972	1.022	1.045		0.93	0.8452	0.03	-0.1	1.5	0.91	0.191752	0.32	-0.14	0.5	0.91	0.80843	0.04	-0.13	1.45
55	51702795	P62913	RL11	60S ribosomal protein L11	178	20.2	9.6		0.985	1.029	1.013	1.094	0.834	1.082	0.945	0.978	1.035	0.972	0.996	1.004	1.039	1.003	0.993	1.03	0.994	1.03		1.009	1.004	0.986	0.991	1.011	1.018		0.99	0.0781313	0.65	-0.01	0.19	0.99	0.0528536	0.87	-0.02	0.06	0.97	0.183562	0.33	-0.05	0.48
56	266921	P30050	RL12	60S ribosomal protein L12	165	17.8	9.42		1.013	1.001	1.017	1.029	1.009	1.038	1.002	0.981	0.984	1.036	1.023	1.043	1.033	0.995	1.047	1.003	1.037	0.939		1.01	1.025	0.989	1.034	1.025	0.993		1.02	0.08667	0.58	0.03	0.24	1.03	0.174049	0.34	0.05	0.47	1	0.0519643	0.9	-0.01	0.05
57	21903462	P26373	RL13	60S ribosomal protein L13	211	24.2	11.65		0.931	0.991	1.036	1.062	0.917	1.059	0.891	0.966	0.954	0.916	1.06	1.06	1.051	0.995	1.055	0.898	1.041	0.912		0.986	1.013	0.937	1.012	1.034	0.95		1.04	0.0966643	0.55	0.05	0.26	1.07	0.148954	0.4	0.09	0.4	0.99	0.0569076	0.81	-0.02	0.09
58	730451	P40429	RL13A	60S ribosomal protein L13a	203	23.6	10.93		0.918	0.976	1.024	1.02	0.913	1.015	0.884	0.982	0.947	0.913	0.975	1.024	1.025	1.078	1.036	1.006	1.002	1.042		0.973	0.982	0.938	0.971	1.046	1.017		0.96	0.241217	0.26	-0.06	0.59	0.97	0.146673	0.41	-0.05	0.39	0.92	0.642064	0.07	-0.12	1.18
59	212276521	P50914	RL14	60S ribosomal protein L14	215	23.4	10.93		1.032	1.027	1.053	1.042	0.924	1.035	0.918	0.981	0.973	0.933	1.081	1.017	1.038	1.046	1.072	0.98	1.035	0.903		1.037	1	0.957	1.01	1.052	0.973		1.07	0.337217	0.18	0.09	0.75	1.03	0.0767546	0.64	0.04	0.19	0.98	0.0647514	0.74	-0.02	0.13
60	47117726	P61313	RL15	60S ribosomal protein L15	204	24.1	11.62		0.936	0.987	0.999	1.052	1.091	1.036	0.866	0.939	0.961	0.916	1.066	1.08	1.125	1.078	1.122	0.989	1.063	0.974		0.974	1.06	0.922	1.021	1.108	1.009		0.97	0.168024	0.36	-0.05	0.44	1.05	0.323221	0.19	0.07	0.73	0.91	0.529187	0.09	-0.13	1.03
61	132799	P18621	RL17	60S ribosomal protein L17	184	21.4	10.17		0.973	1.016	1.028	1.038	0.997	1.067	0.925	0.985	0.965	0.961	1.01	0.994	1.019	1.077	1.021	1.059	1.014	1.03		1.006	1.034	0.958	0.988	1.039	1.035		0.97	0.25203	0.24	-0.04	0.61	1	0.0501819	0.98	0	0.01	0.93	0.885835	0.03	-0.11	1.58
62	548749	Q07020	RL18	60S ribosomal protein L18	188	21.6	11.72		0.975	1.005	1.047	1.059	0.901	1.057	0.862	0.967	0.936	0.871	1.005	1.071	1.072	1.094	1.076	0.98	1.006	1.005		1.009	1.006	0.922	0.982	1.081	0.997		1.01	0.0804509	0.62	0.02	0.2	1.01	0.0530726	0.88	0.01	0.06	0.92	0.576278	0.08	-0.11	1.1
63	730538	Q02543	RL18A	60S ribosomal protein L18a	176	20.7	10.71		1.011	1.008	1.04	1.017	0.947	1.018	0.946	0.988	0.965	1.012	1.08	1.029	1.056	1.007	1.043	0.987	1.035	0.919		1.02	0.994	0.966	1.04	1.036	0.98		1.04	0.190936	0.33	0.06	0.49	1.01	0.0624437	0.76	0.02	0.12	0.99	0.0663994	0.71	-0.02	0.15
64	51338661	P84098	RL19	60S ribosomal protein L19	196	23.5	11.47		0.924	1.002	1.037	1.018	0.864	1.014	0.854	0.976	0.946	0.882	1.01	1.037	1.051	1.068	1.006	0.956	0.98	0.996		0.987	0.965	0.925	0.976	1.042	0.977		1.01	0.058543	0.79	0.01	0.1	0.99	0.0556852	0.83	-0.02	0.08	0.95	0.248249	0.25	-0.08	0.61
65	1172991	P46778	RL21	60S ribosomal protein L21	160	18.6	10.49		1.015	1.033	1.03	1.026	1.04	1.015	0.924	0.977	0.967	0.955	1.027	1.039	1.034	0.974	1.042	0.964	1.008	0.94		1.026	1.027	0.956	1.007	1.017	0.971		1.06	0.687027	0.06	0.08	1.25	1.06	0.681837	0.06	0.08	1.23	0.98	0.0866574	0.6	-0.02	0.22
66	464628	P35268	RL22	60S ribosomal protein L22	128	14.8	9.19		1.039	0.986	1.001	1.022	1.179	1.016	0.992	1.011	1.006	0.991	0.983	0.99	1.014	0.973	0.967	0.996	1.004	0.98		1.009	1.072	1.003	0.988	0.985	0.993		1.02	0.143163	0.43	0.02	0.37	1.08	0.283174	0.22	0.11	0.67	1.01	0.182635	0.34	0.01	0.47
67	51338639	P62829	RL23	60S ribosomal protein L23	140	14.9	10.51		0.995	0.992	0.992	0.981	1.077	0.957	0.927	0.92	0.939	1.007	1.028	1.019	1.026	0.996	1.021	1	1.059	1.03		0.993	1.005	0.929	1.018	1.014	1.03		0.96	0.522352	0.1	-0.05	1.02	0.98	0.0912174	0.58	-0.03	0.24	0.9	0.998462	0	-0.15	2.32
68	51338637	P62750	RL23A	60S ribosomal protein L23a	156	17.7	10.45		1.053	0.985	1.018	1.029	1.058	1.075	0.957	0.973	0.959	0.906	0.949	0.933	0.97	1	0.964	0.983	0.975	1.016		1.019	1.054	0.963	0.929	0.978	0.991		1.03	0.207281	0.3	0.04	0.52	1.06	0.873982	0.03	0.09	1.58	0.97	0.487843	0.11	-0.04	0.97
69	41393532	P83731	RL24	60S ribosomal protein L24	157	17.8	11.25		0.924	0.977	1.004	1.029	0.918	1.062	0.877	1.007	0.947	0.865	1.037	1.011	1.025	1.063	1.077	0.962	0.969	0.945		0.969	1.003	0.943	0.971	1.055	0.959		1.01	0.0677696	0.71	0.01	0.15	1.05	0.158128	0.37	0.07	0.43	0.98	0.0687656	0.71	-0.02	0.15
70	47117765	P61254	RL26	60S ribosomal protein L26	145	17.2	10.55		1.009	1.045	1.056	1.021	0.907	1.083	0.946	0.981	1	1	1.05	1.013	1.028	1.087	1.104	1.058	0.975	1.216		1.036	1.003	0.976	1.021	1.073	1.083		0.96	0.0958448	0.55	-0.06	0.26	0.93	0.140842	0.42	-0.11	0.38	0.9	0.286119	0.21	-0.15	0.67
71	47117772	P61353	RL27	60S ribosomal protein L27	136	15.8	10.56		0.807	0.939	0.94	1.028	0.638	1.053	0.849	0.983	0.979	0.875	0.923	0.956	0.956	1.127	0.95	1.062	0.934	1.326		0.895	0.906	0.937	0.918	1.011	1.107		0.81	0.363591	0.16	-0.31	0.79	0.82	0.19027	0.32	-0.29	0.49	0.85	0.255715	0.24	-0.24	0.62
72	1173017	P46776	RL27A	60S ribosomal protein L27a	148	16.6	11		0.896	0.957	1.002	1.02	0.863	1	0.914	0.985	0.921	0.903	0.985	0.963	1.011	1.043	1.007	1.032	0.972	1.036		0.952	0.961	0.94	0.95	1.02	1.013		0.94	0.340568	0.17	-0.09	0.76	0.95	0.152711	0.38	-0.08	0.42	0.93	0.596701	0.08	-0.11	1.12
73	22002069	P46779	RL28	60S ribosomal protein L28	137	15.7	12.02		1.009	1.014	1.048	1.035	0.955	1.034	0.886	0.936	0.958	0.904	1.051	1.082	1.082	1.044	1.082	0.941	1.02	0.951		1.024	1.008	0.927	1.012	1.069	0.971		1.05	0.432211	0.13	0.08	0.89	1.04	0.162935	0.36	0.05	0.44	0.96	0.246552	0.25	-0.07	0.6
74	1350706	P47914	RL29	60S ribosomal protein L29	159	17.7	11.66		1.028	1.013	1.2	1.166	1.653	1.215	0.579	0.888	0.891	0.481	1.216	1.284	1.232	1.146	1.272	0.65	1.016	0.546		1.08	1.345	0.786	0.993	1.216	0.737		1.47	0.539765	0.09	0.55	1.04	1.82	0.753522	0.04	0.87	1.35	1.07	0.0582663	0.8	0.09	0.1
75	51702805	P62888	RL30	60S ribosomal protein L30	115	12.8	9.63		1.007	0.995	1.012	1.01	0.839	1.009	0.983	0.98	0.964	1.024	1.017	1.002	1.011	1.002	1.042	1.028	1.034	0.98		1.004	0.953	0.975	1.014	1.018	1.014		0.99	0.0838909	0.62	-0.01	0.21	0.94	0.164978	0.36	-0.09	0.44	0.96	0.518424	0.1	-0.06	1.01
76	51702807	P62899	RL31	60S ribosomal protein L31	125	14.5	10.54		1.044	1.009	1.043	1.027	0.924	1.009	0.967	1.003	0.97	0.967	1.044	1.027	1.012	1.024	1.001	0.985	0.986	1.014		1.032	0.987	0.98	1.013	1.012	0.995		1.04	0.62925	0.07	0.05	1.16	0.99	0.0562163	0.81	-0.01	0.09	0.98	0.159609	0.37	-0.02	0.43
77	51702809	P62910	RL32	60S ribosomal protein L32	135	15.8	11.33		0.997	1.027	1.123	1.076	0.837	1.081	0.88	0.971	1.037	0.851	1.028	1.095	1.118	0.979	1.097	0.847	1.017	0.704		1.049	0.998	0.963	0.991	1.065	0.856		1.23	0.450924	0.12	0.29	0.92	1.17	0.199748	0.3	0.22	0.52	1.12	0.171534	0.35	0.17	0.46
78	22002070	P49207	RL34	60S ribosomal protein L34	117	13.3	11.47		1.006	1.019	1.055	1.039	1.091	1.068	0.875	0.979	0.975	0.842	1.028	1.06	1.039	1.094	1.066	0.923	0.993	0.896		1.027	1.066	0.943	0.977	1.066	0.937		1.1	0.722009	0.05	0.13	1.29	1.14	0.944192	0.02	0.19	1.76	1.01	0.0519258	0.9	0.01	0.04
79	1173039	P42766	RL35	60S ribosomal protein L35	123	14.5	11.05		0.994	0.97	1.006	1.057	0.925	1.051	0.874	0.945	0.961	0.911	1.045	1.047	1.085	1.067	1.048	0.955	1.008	0.96		0.99	1.011	0.926	1.001	1.066	0.974		1.02	0.11978	0.46	0.02	0.34	1.04	0.119382	0.47	0.05	0.33	0.95	0.298758	0.21	-0.07	0.69
80	22002061	P18077	RL35A	60S ribosomal protein L35a	110	12.5	11.06		0.892	0.974	0.99	0.992	0.795	0.992	0.936	0.974	0.961	1.045	1.049	1.039	1.036	1.039	1.03	1.024	1.031	1.04		0.952	0.926	0.957	1.044	1.035	1.032		0.92	0.669952	0.06	-0.12	1.23	0.9	0.32848	0.19	-0.16	0.73	0.93	0.999683	0	-0.11	2.48
81	7388073	Q9Y3U8	RL36	60S ribosomal protein L36	105	12.2	11.59		0.771	0.863	0.95	0.962	0.507	1.048	0.809	1.048	1.018	0.838	0.888	0.921	0.952	1.128	0.986	1.033	0.857	1.469		0.861	0.839	0.959	0.882	1.022	1.12		0.77	0.25375	0.24	-0.38	0.61	0.75	0.190389	0.32	-0.42	0.49	0.86	0.122516	0.46	-0.22	0.34
82	47117731	P83881	RL36A	60S ribosomal protein L36a	106	12.4	10.58		0.972	0.989	1.077	1.087	1.107	1.079	0.846	0.935	0.959	0.864	1.092	1.106	1.1	1.036	1.103	0.903	1.024	0.868		1.013	1.091	0.913	1.02	1.08	0.932		1.09	0.266183	0.23	0.12	0.64	1.17	0.852767	0.03	0.23	1.53	0.98	0.0613036	0.77	-0.03	0.11
83	57013007	Q969Q0	RL36L	60S ribosomal protein L36a-like	106	12.5	10.65		0.948	1.011	1.05	1.087	1.018	1.043	0.827	0.919	1.01	0.796	1.035	1.057	1.078	1.031	1.09	0.852	1.068	0.808		1.003	1.049	0.919	0.963	1.066	0.909		1.1	0.181134	0.34	0.14	0.47	1.15	0.354978	0.17	0.21	0.78	1.01	0.0511527	0.93	0.01	0.03
84	48429090	P61927	RL37	60S ribosomal protein L37	97	11.1	11.74		0.935	0.958	1.177	1.163	1.521	1.146	0.561	0.879	0.884	0.63	1.163	1.213	1.131	1.09	1.185	0.786	0.959	0.687		1.023	1.277	0.775	1.002	1.135	0.811		1.26	0.432357	0.13	0.34	0.89	1.57	0.828458	0.03	0.66	1.48	0.96	0.0578062	0.8	-0.07	0.1
85	47606455	P61513	RL37A	60S ribosomal protein L37a	92	10.3	10.43		1.097	1.008	1.037	1.004	1.168	1.018	0.995	0.983	0.976	1.049	1.036	1.033	1.076	1.048	1.172	1.032	1.089	0.947		1.047	1.063	0.985	1.039	1.099	1.023		1.02	0.0758885	0.64	0.03	0.19	1.04	0.0886625	0.58	0.06	0.24	0.96	0.140512	0.41	-0.05	0.39
86	52783779	P63173	RL38	60S ribosomal protein L38	70	8.2	10.1		0.853	0.927	0.966	0.986	0.731	0.999	0.985	1.02	0.933	0.868	0.896	1.007	0.997	1.092	0.915	0.979	0.984	1.293		0.916	0.905	0.979	0.923	1.001	1.085		0.84	0.309136	0.19	-0.25	0.71	0.83	0.241508	0.26	-0.26	0.59	0.9	0.157004	0.38	-0.15	0.42
87	302393718	P62987	RL40	Ubiquitin-60S ribosomal protein L40	128	14.7	9.83		1.063	1.062	0.982	1.009	1.399	0.964	0.821	0.866	0.987	0.851	1.114	1.113	1.072	0.97	1.049	0.775	1.098	0.735		1.036	1.124	0.892	1.026	1.03	0.869		1.19	0.267225	0.23	0.25	0.64	1.29	0.268458	0.23	0.37	0.64	1.03	0.0536027	0.87	0.04	0.06
88	133041	P05388	RLA0	60S acidic ribosomal protein P0	317	34.3	5.97		0.82	0.9	0.921	0.986	0.58	1.035	0.887	0.965	0.948	0.929	0.935	0.957	1.035	1.144	1.046	1.077	0.977	1.156		0.881	0.867	0.933	0.941	1.075	1.07		0.82	0.815527	0.03	-0.28	1.46	0.81	0.240884	0.26	-0.3	0.59	0.87	0.604548	0.07	-0.2	1.13
89	133051	P05386	RLA1	60S acidic ribosomal protein P1	114	11.5	4.32		0.878	0.928	0.886	0.927	0.782	0.995	0.943	0.944	0.953	0.812	0.901	0.924	0.923	1.051	0.983	1.091	0.967	1.227		0.897	0.901	0.947	0.879	0.985	1.095		0.82	0.662708	0.06	-0.29	1.21	0.82	0.45619	0.12	-0.28	0.93	0.86	0.451812	0.12	-0.21	0.93
90	133061	P05387	RLA2	60S acidic ribosomal protein P2	115	11.7	4.54		0.696	0.809	0.885	0.973	0.532	1.046	0.789	0.941	0.905	0.7	0.729	0.845	0.843	1.14	0.869	1.085	0.794	1.989		0.797	0.85	0.878	0.758	0.951	1.289		0.62	0.248595	0.25	-0.69	0.61	0.66	0.185229	0.33	-0.6	0.48	0.68	0.189871	0.32	-0.55	0.49
91	239938694	Q9BYD6	RM01	39S ribosomal protein L1, mitochondrial	325	36.9	8.78		0.954	1	0.99	1.011	0.607	0.979	0.973	1.026	1.041	0.986	0.97	1.015	0.984	0.944	0.916	1.082	0.982	0.986		0.982	0.866	1.014	0.991	0.948	1.017		0.97	0.155446	0.38	-0.05	0.42	0.85	0.18889	0.32	-0.23	0.49	1	0.050642	0.94	0	0.03
92	118573672	Q5T653	RM02	39S ribosomal protein L2, mitochondrial	305	33.3	11.3		1.148	1.145	1.057	1.006	0.962	0.978	1.085	1.003	1.016	1.01	1.039	0.991	1.002	0.9	0.94	0.934	0.985	0.859		1.116	0.982	1.035	1.014	0.948	0.926		1.21	0.95	0.02	0.27	1.8	1.06	0.275873	0.22	0.08	0.65	1.12	0.617968	0.07	0.16	1.15
93	133116	P09001	RM03	39S ribosomal protein L3, mitochondrial	348	38.6	9.48		1.038	0.957	0.983	1.083	0.978	0.968	0.936	1.01	1.02	1.089	0.978	0.922	0.97	0.994	0.978	1.141	1.054	1.102		0.992	1.01	0.989	0.996	0.981	1.099		0.9	0.803323	0.04	-0.15	1.43	0.92	0.461654	0.11	-0.12	0.94	0.9	0.785281	0.04	-0.15	1.41
94	74733471	Q9BYD3	RM04	39S ribosomal protein L4, mitochondrial	311	34.9	9.72		1.183	0.949	1.024	1.06	1.567	1.053	1.224	1.149	0.991	1.108	0.965	1.117	1.073	0.933	1.161	1.069	1.086	0.965		1.052	1.226	1.121	1.064	1.056	1.04		1.01	0.0524807	0.89	0.02	0.05	1.18	0.173943	0.35	0.24	0.46	1.08	0.166193	0.36	0.11	0.45
95	209572671	Q9BYD2	RM09	39S ribosomal protein L9, mitochondrial	267	30.2	10.08		0.887	1.03	0.982	1.062	0.64	1.02	1.051	0.987	1.023	1.008	1.007	1.04	1.056	1.024	1.027	1.181	1.168	1.006		0.967	0.907	1.021	1.018	1.036	1.118		0.86	0.515672	0.1	-0.21	1.01	0.81	0.277676	0.22	-0.3	0.66	0.91	0.337229	0.18	-0.13	0.76
96	22001931	Q9Y3B7	RM11	39S ribosomal protein L11, mitochondrial	192	20.7	9.91		0.966	1.061	1.001	1.019	0.655	0.975	1.059	1.019	1.007	1	1.024	1.017	1.006	0.989	0.986	1.064	1.099	1.011		1.009	0.883	1.028	1.013	0.994	1.058		0.95	0.233463	0.27	-0.07	0.57	0.83	0.289787	0.21	-0.26	0.68	0.97	0.158615	0.38	-0.04	0.42
97	22257023	Q9BYD1	RM13	39S ribosomal protein L13, mitochondrial	178	20.7	9.16		1.021	0.974	1.055	0.982	0.83	0.989	1.091	0.97	0.994	1.065	0.97	1.099	1.115	0.966	0.999	0.99	0.972	0.865		1.017	0.933	1.018	1.044	1.027	0.942		1.08	0.34061	0.18	0.11	0.75	0.99	0.0520498	0.9	-0.01	0.05	1.08	0.266774	0.23	0.11	0.64
98	74749064	Q6P1L8	RM14	39S ribosomal protein L14, mitochondrial	145	15.9	10.24		1.021	0.914	0.889	0.887	1.178	0.854	0.924	0.894	0.937	1.097	0.957	0.999	1.043	1.055	1.024	1.154	1.099	1.137		0.941	0.973	0.918	1.018	1.041	1.13		0.83	0.971304	0.01	-0.26	1.91	0.86	0.295218	0.21	-0.22	0.69	0.81	1	0	-0.3	3.29
99	74734761	Q9P015	RM15	39S ribosomal protein L15, mitochondrial	296	33.4	10.01		0.932	1.027	1.082	1.032	0.996	1.033	1.005	0.994	0.95	0.913	0.936	1.032	0.961	0.97	0.877	1.106	0.957	1.136		1.014	1.02	0.983	0.96	0.936	1.066		0.95	0.108682	0.5	-0.07	0.3	0.96	0.121395	0.47	-0.06	0.33	0.92	0.273171	0.23	-0.12	0.65
100	74734684	Q9NX20	RM16	39S ribosomal protein L16, mitochondrial	251	28.4	10.13		1.131	1.048	0.967	0.935	1.306	0.952	1.06	0.857	0.971	1.07	0.987	1.087	0.937	0.955	0.96	0.924	0.934	0.958		1.049	1.064	0.963	1.048	0.951	0.939		1.12	0.558773	0.08	0.16	1.07	1.13	0.165475	0.36	0.18	0.45	1.03	0.0673646	0.71	0.04	0.15
101	74752931	Q9NRX2	RM17	39S ribosomal protein L17, mitochondrial	175	20	10.11		0.974	0.979	0.954	1.009	0.691	1.009	0.943	1.023	1.024	0.987	1.002	0.931	0.988	0.914	0.986	1.03	1.032	0.995		0.969	0.903	0.997	0.973	0.962	1.019		0.95	0.888133	0.02	-0.07	1.62	0.89	0.178758	0.34	-0.17	0.47	0.98	0.110566	0.49	-0.03	0.31
102	41017797	Q9H0U6	RM18	39S ribosomal protein L18, mitochondrial	180	20.6	9.54		1.123	1.014	1.078	1.021	0.973	1.072	0.992	1.054	1.078	1.044	1.069	1.046	1.027	1.03	1.024	1.052	1.064	0.973		1.072	1.022	1.041	1.053	1.027	1.03		1.04	0.155717	0.38	0.06	0.42	0.99	0.0541843	0.86	-0.01	0.07	1.01	0.0587873	0.78	0.02	0.11
103	92090636	P49406	RM19	39S ribosomal protein L19, mitochondrial	292	33.5	9.5		0.973	0.953	1.077	1.014	0.764	1.074	0.924	0.944	0.969	0.983	0.938	0.984	0.939	0.946	1.004	1.107	1.031	0.958		1.001	0.951	0.946	0.968	0.963	1.032		0.97	0.0810481	0.62	-0.04	0.21	0.92	0.115396	0.48	-0.12	0.32	0.92	0.432113	0.13	-0.13	0.9
104	229462820	Q7Z2W9	RM21	39S ribosomal protein L21, mitochondrial	205	22.8	9.89		1.203	1.141	0.925	1.11	1.227	1.139	1.057	1.057	1.003	0.964	0.92	0.967	0.911	0.92	0.984	0.972	0.844	0.879		1.09	1.159	1.039	0.95	0.938	0.898		1.21	0.489403	0.11	0.28	0.97	1.29	0.993195	0.01	0.37	2.13	1.16	0.857797	0.03	0.21	1.54
105	74753031	Q9NWU5	RM22	39S ribosomal protein L22, mitochondrial	206	23.6	9.94		1.056	1.078	1.072	1.033	1.102	1.039	0.981	0.996	1.006	0.981	1.083	1.062	0.976	0.938	1.033	0.984	0.951	0.922		1.069	1.058	0.994	1.042	0.982	0.952		1.12	0.999603	0	0.17	2.44	1.11	0.919161	0.02	0.15	1.69	1.04	0.523938	0.09	0.06	1.02
106	74751733	Q96A35	RM24	39S ribosomal protein L24, mitochondrial	216	24.9	9.29		1.134	1.091	1.067	0.944	1.302	0.984	1.076	0.933	0.959	1.022	1	0.921	0.969	0.966	0.998	0.996	1.127	1.046		1.097	1.077	0.989	0.981	0.978	1.056		1.04	0.149269	0.39	0.05	0.4	1.02	0.0532928	0.87	0.03	0.06	0.94	0.194198	0.31	-0.09	0.5
107	20139806	Q9P0M9	RM27	39S ribosomal protein L27, mitochondrial	148	16.1	10.42		0.921	0.937	0.905	0.997	0.816	0.986	0.975	1.015	1.007	0.945	0.897	0.973	0.996	0.974	1.143	1.02	1.079	1.084		0.921	0.933	0.999	0.938	1.038	1.061		0.87	0.999685	0	-0.2	2.48	0.88	0.484502	0.11	-0.19	0.97	0.94	0.666043	0.06	-0.09	1.23
108	74730583	Q8TCC3	RM30	39S ribosomal protein L30, mitochondrial	161	18.5	9.99		0.947	0.996	0.976	1.005	0.656	0.829	0.947	0.931	0.976	0.968	1.022	0.993	0.986	0.9	0.941	1.025	0.996	0.87		0.973	0.83	0.951	0.994	0.943	0.964		1.01	0.0535038	0.86	0.01	0.07	0.86	0.207535	0.3	-0.22	0.53	0.99	0.0574064	0.81	-0.02	0.09
109	22001923	Q9BYC8	RM32	39S ribosomal protein L32, mitochondrial	188	21.4	9.73		1.446	1.205	1.064	0.973	1.06	1.283	1.162	1.101	1.124	1.053	1.023	0.872	0.948	0.837	0.982	0.959	1.09	0.924		1.239	1.105	1.129	0.983	0.922	0.991		1.25	0.471699	0.11	0.32	0.95	1.12	0.177788	0.34	0.16	0.47	1.14	0.660778	0.06	0.19	1.21
110	152083350	Q9BZE1	RM37	39S ribosomal protein L37, mitochondrial	423	48.1	8.59		0.896	1	1.008	0.911	0.945	0.909	0.847	0.956	0.895	1.012	0.962	0.989	0.976	0.951	0.921	0.949	1.003	0.917		0.968	0.922	0.899	0.988	0.949	0.956		1.01	0.0579651	0.8	0.02	0.1	0.96	0.214284	0.28	-0.05	0.55	0.94	0.266929	0.23	-0.09	0.64
111	118573679	Q96DV4	RM38	39S ribosomal protein L38, mitochondrial	380	44.6	7.53		0.894	1.026	0.973	0.993	0.921	1	1.011	1.089	0.978	0.973	0.873	0.918	0.907	0.916	0.914	0.986	0.912	1.003		0.964	0.971	1.026	0.921	0.912	0.967		1	0.050426	0.96	0	0.02	1	0.0512028	0.91	0.01	0.04	1.06	0.252932	0.24	0.09	0.61
112	296452977	Q9NYK5	RM39	39S ribosomal protein L39, mitochondrial	338	38.7	7.65		1.025	1.049	1	1.001	1.098	0.966	0.99	0.999	0.991	1.031	1.006	0.955	0.938	0.922	0.95	0.928	1.035	0.928		1.025	1.022	0.993	0.997	0.937	0.964		1.06	0.321825	0.19	0.09	0.72	1.06	0.179406	0.34	0.08	0.47	1.03	0.121182	0.46	0.04	0.34
113	21263795	Q9NQ50	RM40	39S ribosomal protein L40, mitochondrial	206	24.5	9.63		1.154	1.08	1.003	0.925	0.989	0.922	1.083	1.078	1.141	1.066	0.954	0.942	0.992	0.895	1.035	1.102	1.086	1.018		1.079	0.945	1.101	0.987	0.974	1.069		1.01	0.0541618	0.84	0.01	0.07	0.88	0.911632	0.02	-0.18	1.65	1.03	0.153893	0.38	0.04	0.42
114	50401603	Q8N983	RM43	39S ribosomal protein L43, mitochondrial	215	23.4	8.65		0.969	1.058	0.969	1.006	0.72	0.986	0.988	0.942	0.977	0.883	0.887	0.891	0.833	0.897	0.985	0.895	0.948	0.983		0.998	0.904	0.969	0.887	0.905	0.942		1.06	0.27156	0.22	0.08	0.65	0.96	0.0668995	0.71	-0.06	0.15	1.03	0.143553	0.41	0.04	0.39
115	51316917	Q9H9J2	RM44	39S ribosomal protein L44, mitochondrial	332	37.5	8.4		0.88	1.023	0.96	0.983	0.946	0.999	1.014	1.043	0.969	0.991	1.036	0.972	0.998	0.965	1.035	1.026	1.002	1.037		0.954	0.976	1.009	1	0.999	1.021		0.93	0.315736	0.19	-0.1	0.72	0.96	0.600838	0.07	-0.07	1.13	0.99	0.077123	0.62	-0.02	0.21
116	29611869	Q9BRJ2	RM45	39S ribosomal protein L45, mitochondrial	306	35.3	9.03		0.998	0.99	1.032	1.005	0.975	1.027	1.035	1.004	0.958	0.885	0.927	0.969	0.951	0.956	0.928	1.081	1.012	0.882		1.007	1.002	0.999	0.927	0.945	0.991		1.02	0.0576605	0.81	0.02	0.09	1.01	0.0535549	0.87	0.02	0.06	1.01	0.0517476	0.91	0.01	0.04
117	52783325	Q9H2W6	RM46	39S ribosomal protein L46, mitochondrial	279	31.7	7.05		0.951	0.959	1.024	1.06	1.185	1.092	1.228	1.101	1.197	1.071	0.992	0.986	0.952	0.968	0.966	1.048	1.044	1.051		0.978	1.112	1.176	1.016	0.962	1.048		0.93	0.786737	0.04	-0.1	1.39	1.06	0.359892	0.16	0.09	0.8	1.12	0.858586	0.03	0.17	1.54
118	212276461	Q9HD33	RM47	39S ribosomal protein L47, mitochondrial	250	29.4	10.37		1.069	1.086	1.028	0.998	1.024	0.956	0.975	1.019	0.992	0.913	0.942	0.962	0.905	0.878	0.97	0.933	0.943	0.986		1.061	0.993	0.995	0.939	0.918	0.954		1.11	0.979993	0.01	0.15	1.97	1.04	0.300041	0.21	0.06	0.68	1.04	0.455836	0.12	0.06	0.93
119	6093524	Q13405	RM49	39S ribosomal protein L49, mitochondrial	166	19.2	9.45		0.988	1.111	1.072	1.054	1.156	0.996	0.999	1.051	1.046	0.991	0.938	1.051	0.921	0.97	1.064	0.979	0.993	1.117		1.057	1.069	1.032	0.993	0.985	1.03		1.03	0.0741461	0.65	0.04	0.18	1.04	0.0898672	0.57	0.05	0.24	1	0.0501939	0.96	0	0.02
120	118573685	Q8N5N7	RM50	39S ribosomal protein L50, mitochondrial	158	18.3	7.88		0.872	0.917	0.93	1.062	0.863	0.996	0.942	1.043	0.983	1.105	1.022	0.984	0.96	1.116	0.935	1.155	1.002	1.174		0.906	0.974	0.989	1.037	1.004	1.11		0.82	0.896507	0.02	-0.29	1.63	0.88	0.358817	0.16	-0.19	0.79	0.89	0.447303	0.12	-0.17	0.91
121	74762954	Q4U2R6	RM51	39S ribosomal protein L51, mitochondrial	128	15.1	11.27		0.858	1	1.008	1.03	0.828	0.926	0.985	1.097	1.07	0.998	0.965	0.872	0.924	1.007	0.87	1.173	0.988	1.342		0.955	0.928	1.051	0.945	0.934	1.168		0.82	0.420643	0.13	-0.29	0.87	0.79	0.476544	0.11	-0.33	0.95	0.9	0.17863	0.34	-0.15	0.47
122	74731579	Q96EL3	RM53	39S ribosomal protein L53, mitochondrial	112	12.1	8.76		1.123	1.025	1.022	0.992	0.823	1.048	1.172	0.935	1.023	1.015	1.067	0.966	0.979	0.947	0.915	0.961	0.959	0.878		1.057	0.954	1.043	1.016	0.947	0.933		1.13	0.752178	0.05	0.18	1.35	1.02	0.0588554	0.79	0.03	0.1	1.12	0.286664	0.21	0.16	0.67
123	74737109	Q6P161	RM54	39S ribosomal protein L54, mitochondrial	138	15.8	9.6		1.005	1.108	1.034	1.089	0.733	0.938	1.112	0.931	1.016	1.117	1.018	0.933	1.043	1.113	0.964	1.176	1.067	1.125		1.049	0.92	1.02	1.023	1.04	1.123		0.93	0.352822	0.17	-0.1	0.77	0.82	0.421046	0.13	-0.29	0.87	0.91	0.354161	0.17	-0.14	0.78
124	74750237	Q7Z7F7	RM55	39S ribosomal protein L55, mitochondrial	128	15.1	11.15		0.947	1.028	0.918	0.968	0.79	0.941	0.944	1.003	1.023	1.03	0.857	1.14	0.896	1.041	1.007	1.009	1.068	0.899		0.964	0.9	0.99	1.009	0.981	0.992		0.97	0.0737942	0.67	-0.04	0.18	0.91	0.216958	0.28	-0.14	0.55	1	0.0501414	0.97	0	0.01
125	24212389	Q9Y399	RT02	28S ribosomal protein S2, mitochondrial	296	33.2	9.26		1.007	1.076	1.09	0.957	1.083	0.874	1	0.942	0.9	1.061	1.098	1.009	0.963	0.848	0.969	0.924	0.99	0.927		1.058	0.971	0.947	1.056	0.927	0.947		1.12	0.853106	0.03	0.16	1.53	1.03	0.0648407	0.72	0.04	0.14	1	0.05	1	0	0
126	24212347	P82675	RT05	28S ribosomal protein S5, mitochondrial	430	48	9.92		1.001	1.056	0.982	0.999	0.878	1.009	0.956	1.014	0.997	1.052	1.023	1.025	0.989	0.964	1.045	1.137	1.052	1.062		1.013	0.962	0.989	1.033	0.999	1.084		0.94	0.476682	0.11	-0.1	0.95	0.89	0.617435	0.07	-0.17	1.14	0.91	0.77766	0.04	-0.13	1.39
127	296452884	Q9Y2R9	RT07	28S ribosomal protein S7, mitochondrial	242	28.1	9.99		0.923	0.965	1.061	0.982	0.916	1.003	0.948	0.993	0.895	1.009	1.002	0.997	0.951	1.036	1.039	1.03	1.047	1.043		0.983	0.967	0.945	1.003	1.009	1.04		0.95	0.258192	0.24	-0.08	0.62	0.93	0.709106	0.05	-0.1	1.28	0.91	0.850252	0.03	-0.14	1.53
128	218511769	P82933	RT09	28S ribosomal protein S9, mitochondrial	396	45.8	9.51		1.079	1.047	1.048	1.047	0.805	1.009	0.999	0.994	0.986	1.041	1.011	0.98	0.979	0.877	0.954	0.975	1	0.902		1.058	0.954	0.993	1.011	0.937	0.959		1.1	0.823102	0.03	0.14	1.46	0.99	0.0504092	0.95	-0.01	0.02	1.04	0.193303	0.32	0.05	0.5
129	21263985	P82912	RT11	28S ribosomal protein S11, mitochondrial	194	20.6	10.81		0.965	1.054	0.918	0.93	0.734	0.93	1.031	0.948	0.968	1.015	1.011	0.998	0.914	0.856	0.905	0.955	0.962	0.817		0.979	0.865	0.982	1.008	0.892	0.911		1.07	0.181858	0.33	0.1	0.48	0.95	0.0850477	0.6	-0.08	0.22	1.08	0.242029	0.25	0.11	0.6
130	3024582	O15235	RT12	28S ribosomal protein S12, mitochondrial	138	15.2	10.29		1.303	1.094	1.05	0.935	1.161	0.874	1.04	0.871	0.851	1.034	1.062	0.936	1.032	0.989	0.96	1.004	1.1	0.909		1.149	0.99	0.921	1.011	0.994	1.004		1.14	0.29868	0.2	0.19	0.69	0.99	0.05196	0.9	-0.02	0.05	0.92	0.163011	0.36	-0.13	0.44
131	13633907	P82914	RT15	28S ribosomal protein S15, mitochondrial	257	29.8	10.48		1.093	1.048	1.02	1.008	1.021	1.05	1.04	0.887	0.938	0.98	1.011	0.91	0.979	0.98	0.93	1.03	0.973	0.866		1.054	1.026	0.955	0.967	0.963	0.956		1.1	0.414869	0.14	0.14	0.86	1.07	0.265658	0.23	0.1	0.64	1	0.0500246	0.98	0	0.01
132	13633952	Q9Y3D3	RT16	28S ribosomal protein S16, mitochondrial	137	15.3	9.5		0.843	0.999	0.937	0.869	0.88	1.03	0.971	0.923	0.982	0.897	0.831	0.931	0.934	0.949	0.9	1.017	0.999	1.1		0.927	0.926	0.959	0.886	0.928	1.039		0.89	0.475664	0.11	-0.16	0.95	0.89	0.415685	0.14	-0.17	0.86	0.92	0.541367	0.09	-0.12	1.04
133	24212201	Q9NVS2	RT18A	28S ribosomal protein S18a, mitochondrial	196	22.2	10.33		1.079	1.115	1.035	1.023	1.229	1	1.099	0.983	1.018	0.965	0.998	0.969	0.952	0.852	0.941	0.907	1.002	0.897		1.076	1.084	1.033	0.977	0.915	0.935		1.15	0.880599	0.03	0.2	1.59	1.16	0.413194	0.14	0.21	0.86	1.1	0.478111	0.11	0.14	0.96
134	24212203	Q9Y676	RT18B	28S ribosomal protein S18b, mitochondrial	258	29.4	9.38		1.118	1.119	1.096	0.992	0.94	0.948	1.015	0.948	1.033	0.984	1.048	0.955	0.931	0.943	0.942	0.969	1.001	0.675		1.111	0.96	0.999	0.996	0.939	0.882		1.26	0.53398	0.09	0.33	1.04	1.09	0.109688	0.5	0.12	0.3	1.13	0.180403	0.34	0.18	0.47
135	13633893	P82650	RT22	28S ribosomal protein S22, mitochondrial	360	41.3	7.9		0.995	1.036	1.034	1.045	0.974	1.035	1.084	1.109	1.051	1.018	0.936	0.956	0.944	1.081	0.918	1.089	0.975	1.174		1.022	1.018	1.082	0.97	0.981	1.079		0.95	0.150884	0.39	-0.08	0.41	0.94	0.156068	0.38	-0.08	0.42	1	0.050266	0.97	0	0.01
136	31077184	Q9Y3D9	RT23	28S ribosomal protein S23, mitochondrial	190	21.8	8.9		1.089	0.963	0.961	0.969	0.893	1.078	1.056	1.173	1.035	0.845	1.041	1.044	0.907	0.821	1.003	0.912	0.923	0.825		1.004	0.98	1.088	0.976	0.91	0.887		1.13	0.543889	0.09	0.18	1.06	1.11	0.293249	0.21	0.14	0.69	1.23	0.927171	0.02	0.3	1.72
137	28201886	Q9BYN8	RT26	28S ribosomal protein S26, mitochondrial	205	24.2	10.39		1.026	0.968	0.971	0.997	1.102	0.956	1.044	0.982	1.061	1.063	1.021	0.97	0.984	1.139	1.017	1.08	1.008	1.199		0.988	1.019	1.029	1.018	1.046	1.096		0.9	0.405262	0.14	-0.15	0.85	0.93	0.17935	0.34	-0.11	0.47	0.94	0.182931	0.33	-0.09	0.48
138	209572725	Q92552	RT27	28S ribosomal protein S27, mitochondrial	414	47.6	6.18		0.996	1.066	1.022	0.984	0.779	1.009	1.026	0.928	1.002	1.046	1.112	1.004	1.031	1.096	0.992	1.058	1.122	1.017		1.028	0.924	0.985	1.054	1.04	1.065		0.96	0.160269	0.37	-0.05	0.44	0.87	0.387193	0.15	-0.21	0.83	0.92	0.421699	0.13	-0.11	0.88
139	22001973	Q9Y2Q9	RT28	28S ribosomal protein S28, mitochondrial	187	20.8	9.1		0.839	0.953	0.98	0.948	0.786	1.046	0.986	0.999	0.982	0.97	0.902	0.893	0.906	0.934	0.972	1.028	0.928	1.02		0.924	0.927	0.989	0.922	0.937	0.992		0.93	0.22378	0.28	-0.1	0.56	0.93	0.117521	0.47	-0.1	0.33	1	0.0509085	0.94	0	0.03
140	1706299	P51398	RT29	28S ribosomal protein S29, mitochondrial	398	45.5	8.88		1.014	1.005	0.971	1.056	0.718	1.052	0.996	1.077	0.961	0.935	0.93	0.974	0.986	1.015	0.91	1.161	1.023	1.065		0.997	0.942	1.011	0.946	0.97	1.083		0.92	0.464479	0.12	-0.12	0.94	0.87	0.202352	0.3	-0.2	0.52	0.93	0.247808	0.25	-0.1	0.6
141	116242771	Q9NP92	RT30	28S ribosomal protein S30, mitochondrial	439	50.3	7.97		1.073	1.01	0.938	1.028	1.195	0.907	1	0.994	1.006	0.929	0.874	0.848	0.842	0.87	0.798	1.06	0.907	1.163		1.007	1.043	1	0.884	0.837	1.043		0.97	0.0696996	0.69	-0.05	0.16	1	0.05	1	0	0	0.96	0.0859061	0.59	-0.06	0.23
142	93186129	Q92665	RT31	28S ribosomal protein S31, mitochondrial	395	45.3	9.29		1.225	1.081	0.957	1.009	1.592	0.996	1.095	1.131	0.961	0.985	1.059	0.913	1.08	1.041	1.082	1.127	1.157	1.212		1.087	1.199	1.062	0.985	1.068	1.166		0.93	0.152579	0.39	-0.1	0.41	1.03	0.0529591	0.87	0.04	0.06	0.91	0.39659	0.15	-0.13	0.84
143	24212369	P82930	RT34	28S ribosomal protein S34, mitochondrial	218	25.6	9.98		1.11	1.076	1.063	1.048	1.048	1.174	1.033	1.21	1.059	0.971	0.905	0.882	0.947	0.959	0.919	1.001	0.962	1.123		1.083	1.09	1.101	0.919	0.942	1.029		1.05	0.174618	0.35	0.07	0.46	1.06	0.148283	0.39	0.08	0.4	1.07	0.15448	0.38	0.1	0.42
144	74708095	P82673	RT35	28S ribosomal protein S35, mitochondrial	323	36.8	8.24		0.771	0.867	0.853	0.987	0.521	1.103	0.941	1.111	0.948	1.077	1.074	1.036	1.029	0.904	0.837	0.99	0.988	0.944		0.83	0.87	1	1.062	0.924	0.974		0.85	0.969474	0.01	-0.23	1.9	0.89	0.086552	0.59	-0.16	0.23	1.03	0.0719068	0.67	0.04	0.17
145	41688617	P82909	RT36	28S ribosomal protein S36, mitochondrial	103	11.5	9.99		0.945	1.061	1.072	1.098	0.789	1.096	0.994	0.974	0.951	1.052	0.989	0.981	0.94	0.988	1.027	1.059	1.027	0.984		1.026	0.994	0.973	1.008	0.985	1.024		1	0.0502008	0.96	0	0.02	0.97	0.0587313	0.79	-0.04	0.1	0.95	0.475986	0.11	-0.07	0.94
146	257051064	Q96EE3	SEH1	Nucleoporin SEH1	360	39.6	8.09		1.005	1.041	1.022	1.027	0.948	1.067	1.032	1.068	1.022	1.038	0.944	1.063	1.017	1.018	1.012	1.077	0.972	1.062		1.023	1.014	1.041	1.015	1.016	1.037		0.99	0.0677477	0.7	-0.02	0.16	0.98	0.074716	0.65	-0.03	0.18	1	0.0513427	0.93	0	0.03
147	74733394	Q9BW27	NUP85	Nuclear pore complex protein Nup85	656	75	5.55		1.148	1.087	0.963	1.044	1.227	0.941	1.022	0.977	1.015	1.094	1.085	1.019	0.994	0.925	1.078	0.946	0.976	1.056		1.066	1.071	1.005	1.066	0.999	0.993		1.07	0.193673	0.31	0.1	0.5	1.08	0.131788	0.44	0.11	0.36	1.01	0.0620962	0.76	0.02	0.12
148	238054372	Q12769	NU160	Nuclear pore complex protein Nup160	1436	162	5.5		1.023	1.04	0.908	0.996	0.911	0.991	1.026	0.996	1.031	1.031	1.008	0.998	1.037	0.953	0.97	1.071	1.01	1.048		0.99	0.966	1.018	1.013	0.987	1.043		0.95	0.200341	0.31	-0.08	0.51	0.93	0.585191	0.08	-0.11	1.11	0.98	0.206205	0.29	-0.04	0.54
149	50403748	P55735	SEC13	Protein SEC13 homolog	322	35.5	5.48		0.957	0.987	1.008	1.033	0.726	1.028	1.003	0.96	0.994	0.987	1.043	1.01	0.998	1.035	1.004	0.974	0.983	0.961		0.984	0.929	0.986	1.013	1.012	0.973		1.01	0.10029	0.52	0.02	0.28	0.95	0.0700616	0.69	-0.07	0.16	1.01	0.13646	0.42	0.02	0.37
150	12230339	P57740	NU107	Nuclear pore complex protein Nup107	925	106.3	5.43		0.974	1.037	1.015	0.995	0.86	0.968	1.059	0.952	1.02	1.018	1.01	0.995	0.999	0.978	0.992	1.009	1.012	0.976		1.009	0.941	1.011	1.008	0.99	0.999		1.01	0.0726428	0.68	0.01	0.17	0.94	0.249313	0.24	-0.09	0.62	1.01	0.0638767	0.75	0.02	0.13
151	143811430	Q8WUM0	NU133	Nuclear pore complex protein Nup133	1156	128.9	5.1		0.993	0.997	1.024	0.999	0.93	0.99	1.051	1.002	1.058	0.981	0.969	0.965	1.018	0.962	0.983	0.977	0.955	0.962		1.005	0.973	1.037	0.971	0.987	0.964		1.04	0.886857	0.03	0.06	1.59	1.01	0.066974	0.73	0.01	0.14	1.08	0.937274	0.02	0.1	1.73
152	27923820	Q8NFH4	NUP37	Nucleoporin Nup37	326	36.7	5.92		0.898	0.916	0.952	0.947	0.775	0.954	0.957	0.948	0.968	0.993	0.947	0.983	1.004	1.006	0.977	1.015	0.96	1.135		0.922	0.892	0.958	0.975	0.996	1.037		0.89	0.507889	0.1	-0.17	1	0.86	0.412338	0.14	-0.22	0.86	0.92	0.299331	0.2	-0.11	0.69
153	27923819	Q8NFH3	NUP43	Nucleoporin Nup43	380	42.1	5.63		1.009	1.028	1.028	0.987	1.244	1.011	1.052	1.024	1.009	1.004	1.004	1	0.933	0.909	0.904	0.977	0.975	0.902		1.022	1.08	1.028	1.003	0.915	0.951		1.07	0.724923	0.05	0.1	1.3	1.14	0.295426	0.21	0.18	0.69	1.08	0.722629	0.05	0.11	1.31
154	116242684	Q8N1F7	NUP93	Nuclear pore complex protein Nup93	819	93.4	5.72		1.026	1.018	1.014	1.009	1.017	0.988	1.01	0.978	1.009	1.032	1.042	1.005	1.01	1.001	0.998	0.997	1.01	0.976		1.019	1.005	0.999	1.026	1.003	0.994		1.02	0.595038	0.08	0.04	1.1	1.01	0.125886	0.47	0.02	0.33	1	0.0628303	0.76	0.01	0.12
155	296439283	Q92621	NU205	Nuclear pore complex protein Nup205	2012	227.8	6.19		1.068	1.031	1.022	1.023	0.926	0.998	1.051	1.049	1.062	1.052	1.005	0.983	1.005	0.913	0.97	0.996	0.991	0.943		1.04	0.982	1.054	1.013	0.963	0.977		1.07	0.746865	0.04	0.09	1.36	1.01	0.052357	0.88	0.01	0.06	1.08	0.976298	0.01	0.11	1.96
156	74743623	Q5SRE5	NU188	Nucleoporin NUP188 homolog	1749	195.9	6.73		1.064	1.089	1.074	1.069	1.036	0.99	1.056	1.05	1.026	1.041	1.039	0.937	1.013	0.9	1.005	0.93	1.022	0.886		1.076	1.032	1.044	1.006	0.972	0.946		1.14	0.827813	0.03	0.19	1.48	1.09	0.414499	0.14	0.13	0.87	1.1	0.597311	0.08	0.14	1.12
157	6093462	O75694	NU155	Nuclear pore complex protein Nup155	1391	155.1	6.16		0.962	0.963	0.998	1.015	0.759	0.965	1.017	1.041	1.029	0.993	1.008	0.949	0.979	1.022	0.983	1.071	1.012	1.14		0.974	0.913	1.029	0.983	0.995	1.074		0.91	0.660263	0.06	-0.14	1.22	0.85	0.412763	0.14	-0.23	0.87	0.96	0.205744	0.3	-0.06	0.53
158	74730292	Q8NFH5	NUP53	Nucleoporin NUP53	326	34.8	9.09		1.109	1.072	1.014	1.039	0.942	0.944	1.157	1.141	1.018	1.064	1.039	0.987	0.992	0.942	1.012	1.002	1.048	0.952		1.065	0.975	1.106	1.03	0.982	1.001		1.06	0.336531	0.18	0.09	0.75	0.97	0.0906299	0.57	-0.04	0.24	1.1	0.470444	0.11	0.14	0.95
159	134047855	P37198	NUP62	Nuclear pore glycoprotein p62	522	53.2	5.31		0.808	0.942	0.957	1.023	0.749	1.018	0.945	1.005	0.997	0.946	0.939	0.942	0.918	0.921	0.932	1.084	0.942	1.228		0.902	0.93	0.982	0.942	0.924	1.084		0.83	0.431591	0.13	-0.27	0.89	0.86	0.222013	0.28	-0.22	0.56	0.91	0.208028	0.29	-0.14	0.53
160	38257923	Q7Z3B4	NUP54	Nucleoporin p54	507	55.4	7.02		1.063	1.08	1.04	1.019	0.978	0.954	1.161	1.013	1.058	1.047	1.078	1.103	0.977	1.069	1.038	1.113	1.1	1		1.061	0.984	1.077	1.076	1.028	1.071		0.99	0.0575818	0.8	-0.01	0.1	0.92	0.516488	0.1	-0.12	1.01	1.01	0.0512016	0.92	0.01	0.04
161	44888845	Q9BVL2	NUPL1	Nucleoporin p58/p45	599	60.9	9.33		1.255	1.123	1.025	1.046	1.022	1.064	1.095	1.121	1.126	1.059	1.032	1.02	1.005	0.999	1.028	0.945	1.069	0.867		1.134	1.044	1.114	1.037	1.011	0.96		1.18	0.447675	0.12	0.24	0.91	1.09	0.262288	0.24	0.12	0.63	1.16	0.6632	0.06	0.21	1.21
162	83305554	P49792	RBP2	E3 SUMO-protein ligase RanBP2	3224	358	6.2		0.994	1.024	1.004	0.982	0.927	1.009	1.027	1.025	1.008	1.037	1.023	0.997	0.996	0.946	0.982	1.01	1.022	0.966		1.007	0.973	1.02	1.019	0.975	0.999		1.01	0.0686587	0.7	0.01	0.16	0.97	0.134157	0.42	-0.04	0.38	1.02	0.197297	0.32	0.03	0.49
163	25008854	Q99567	NUP88	Nuclear pore complex protein Nup88	741	83.5	5.69		1.062	1.035	0.976	0.994	1.002	1.022	1.054	1.02	1.023	1.072	0.955	0.962	1.017	0.932	1.025	0.964	1.028	0.987		1.025	1.006	1.032	0.997	0.992	0.993		1.03	0.161972	0.37	0.05	0.43	1.01	0.0934182	0.56	0.02	0.25	1.04	0.393136	0.15	0.06	0.83
164	205831380	P35658	NU214	Nuclear pore complex protein Nup214	2090	213.5	7.47		0.979	0.987	0.96	1.017	1.112	0.984	1.01	0.976	1.002	1.002	1.011	0.974	1.002	0.95	1.03	1.002	1.001	0.965		0.976	1.038	0.996	0.996	0.994	0.989		0.99	0.13646	0.4	-0.02	0.4	1.05	0.211379	0.3	0.07	0.53	1.01	0.0707295	0.7	0.01	0.16
165	3122666	P78406	RAE1L	mRNA export factor	368	40.9	7.83		0.994	1.06	1.016	1.026	1.067	1	1.011	0.988	0.954	1.044	1.02	1.014	1.001	0.955	1.011	1.028	1.044	1.026		1.023	1.031	0.984	1.026	0.989	1.033		0.99	0.0762614	0.67	-0.01	0.18	1	0.0510327	0.93	0	0.03	0.95	0.728195	0.05	-0.07	1.29
166	308153660	P52948	NUP98	Nuclear pore complex protein Nup98-Nup96	1817	197.5	6.4		1.017	0.994	0.99	0.949	1.146	0.924	1.069	0.968	1.01	1.016	1.012	0.977	0.962	0.934	0.978	0.986	1.008	0.925		1	1.006	1.016	1.001	0.958	0.973		1.03	0.16547	0.35	0.04	0.45	1.03	0.0710588	0.68	0.05	0.17	1.04	0.186584	0.32	0.06	0.49
167	97180263	Q9BTX1	NDC1	Nucleoporin NDC1	674	76.3	9.09		1.01	0.98	1	0.999	1.211	0.927	1.067	1.02	0.977	1.082	1.019	1.008	1	0.889	1	0.998	1.022	0.926		0.997	1.046	1.021	1.036	0.963	0.982		1.01	0.0765585	0.66	0.02	0.18	1.06	0.104659	0.52	0.09	0.28	1.04	0.159776	0.37	0.06	0.43
168	205829304	A8CG34	P121C	Nuclear envelope pore membrane protein POM 121C	1229	125	10.37		1.04	1.029	0.99	0.889	0.939	0.984	1.171	1.153	1.159	1.034	0.881	0.96	0.885	1.041	0.978	0.963	0.951	1.192		1.02	0.937	1.161	0.958	0.968	1.035		0.99	0.0537629	0.86	-0.02	0.07	0.91	0.201585	0.3	-0.14	0.52	1.12	0.326218	0.18	0.17	0.73
169	83288218	Q53GS7	GLE1	Nucleoporin GLE1	698	79.8	7.43		1.105	1.026	0.996	1.045	1.228	1.091	1.317	0.904	0.895	1.011	0.973	1.015	0.986	0.953	1.047	0.981	0.981	0.846		1.043	1.121	1.039	1	0.996	0.936		1.11	0.436997	0.13	0.16	0.89	1.2	0.669615	0.06	0.26	1.22	1.11	0.103562	0.52	0.15	0.28
170	73919226	Q9NUU7	DD19A	ATP-dependent RNA helicase DDX19A	478	53.9	6.58		1.026	1.077	1.003	0.968	0.968	0.927	1.021	0.916	1.057	0.954	0.967	1.001	1.064	1.04	0.991	0.981	0.954	0.947		1.036	0.954	0.998	0.974	1.032	0.961		1.08	0.806759	0.04	0.11	1.43	0.99	0.067842	0.71	-0.01	0.15	1.04	0.128298	0.44	0.05	0.35
171	10719979	Q9UMR2	DD19B	ATP-dependent RNA helicase DDX19B	479	53.9	6.3		0.959	0.923	1.049	0.933	1.125	0.936	0.937	0.926	0.957	0.999	1.13	1.085	1.108	1.085	1.086	1.058	1.122	0.944		0.977	0.998	0.94	1.072	1.093	1.041		0.94	0.158317	0.37	-0.09	0.43	0.96	0.0794698	0.62	-0.06	0.21	0.9	0.431351	0.13	-0.15	0.89
172	20139282	Q9UBU9	NXF1	Nuclear RNA export factor 1	619	70.1	8.51		1.038	0.951	1.01	1.026	1.047	1.016	0.989	0.991	0.974	0.971	0.952	1.01	0.956	0.951	0.952	0.991	0.991	0.919		1	1.03	0.984	0.977	0.953	0.967		1.03	0.145952	0.41	0.05	0.39	1.07	0.620534	0.07	0.09	1.14	1.02	0.101608	0.52	0.03	0.28
173	20137527	Q9NRG9	AAAS	Aladin	546	59.5	7.5		0.894	0.99	0.911	1.083	0.785	0.996	1.048	1.123	1.079	1.002	1.044	0.993	0.989	1.111	1.025	1.108	0.963	1.235		0.932	0.954	1.083	1.013	1.042	1.102		0.85	0.47143	0.11	-0.24	0.95	0.87	0.220309	0.28	-0.21	0.55	0.98	0.0557965	0.83	-0.02	0.08
174	20455193	Q9UKX7	NUP50	Nuclear pore complex protein Nup50	468	50.1	7.06		0.944	1.04	0.953	0.969	0.99	0.97	1.018	0.964	0.981	1.013	1.028	1.008	0.997	1.005	0.966	1.001	0.983	1.005		0.979	0.977	0.988	1.016	0.989	0.996		0.98	0.0816195	0.61	-0.03	0.22	0.98	0.453766	0.11	-0.03	0.94	0.99	0.0728957	0.64	-0.01	0.19
175	206729891	P49790	NU153	Nuclear pore complex protein Nup153	1475	153.8	8.73		0.977	1.034	0.999	1.011	0.893	1.026	1.039	1.037	1.017	1.02	1.016	0.986	1.023	1.015	0.998	1.07	1.057	1.015		1.003	0.977	1.031	1.007	1.012	1.047		0.96	0.418448	0.13	-0.06	0.88	0.93	0.308434	0.19	-0.1	0.72	0.98	0.135571	0.41	-0.02	0.39
176	215274208	P12270	TPR	Nucleoprotein TPR	2363	267.1	5.02		0.988	1.011	0.99	1.004	0.903	1.001	1.052	1.038	1.017	1.022	0.973	0.969	1.001	0.988	0.987	1.039	1.042	0.991		0.996	0.97	1.036	0.988	0.992	1.024		0.97	0.308407	0.2	-0.04	0.69	0.95	0.279866	0.22	-0.08	0.66	1.01	0.0912235	0.58	0.02	0.23
177	51338598	P62826	RAN	GTP-binding nuclear protein Ran	216	24.4	7.49		0.98	0.985	1.006	1.01	0.991	1.049	0.975	1.026	1.029	0.973	1.006	1	1.027	1.057	1.057	0.984	0.982	0.98		0.99	1.016	1.01	0.993	1.047	0.982		1.01	0.157475	0.37	0.01	0.44	1.04	0.458056	0.11	0.05	0.95	1.03	0.32338	0.18	0.04	0.74
178	1172922	P46060	RAGP1	Ran GTPase-activating protein 1	587	63.5	4.68		0.933	0.958	0.985	1.034	0.81	1.012	0.911	0.949	0.979	0.995	1.034	1	1.024	1.048	1.005	1.038	1.013	1.037		0.959	0.952	0.946	1.01	1.026	1.029		0.93	0.955806	0.01	-0.1	1.83	0.92	0.175401	0.34	-0.11	0.47	0.92	0.938032	0.02	-0.12	1.76
179	1172837	P43487	RANG	Ran-specific GTPase-activating protein	201	23.3	5.29		0.897	0.936	0.981	1.02	0.664	1.068	0.913	0.984	1.014	0.946	0.99	1.061	1.005	1.145	1.022	0.966	0.964	1.147		0.938	0.917	0.97	0.999	1.057	1.026		0.91	0.247116	0.25	-0.13	0.6	0.89	0.114571	0.49	-0.16	0.31	0.95	0.124266	0.46	-0.08	0.34
180	121897	P07305	H10	Histone H1.0	194	20.9	10.84		0.939	0.982	0.965	1.038	1.064	1.045	0.991	1.057	1.033	0.9	0.964	0.975	0.87	0.908	0.954	0.961	0.898	0.824		0.962	1.049	1.027	0.946	0.911	0.894		1.08	0.337562	0.18	0.11	0.75	1.17	0.932325	0.02	0.23	1.73	1.15	0.787578	0.04	0.2	1.4
181	121919	P10412	H14	Histone H1.4	219	21.9	11.03		1.068	1.085	1.037	1.034	1.05	0.982	1.029	1.033	1.019	0.983	1.02	1.012	0.982	0.897	1.008	0.949	1.045	0.792		1.063	1.022	1.027	1.005	0.962	0.929		1.14	0.387331	0.15	0.2	0.83	1.1	0.210767	0.29	0.14	0.54	1.11	0.24144	0.25	0.15	0.6
182	6016184	Q92522	H1X	Histone H1x	213	22.5	10.76		1.034	0.994	0.977	1.038	1.196	1.018	1.013	1.05	1.102	0.915	0.992	0.998	0.95	0.999	0.953	0.997	1	0.941		1.002	1.084	1.055	0.968	0.967	0.979		1.02	0.137894	0.43	0.03	0.36	1.11	0.380562	0.15	0.15	0.82	1.08	0.59003	0.08	0.11	1.11
183	18202479	Q02539	H11	Histone H1.1	215	21.8	10.99		1.153	1.05	1.044	1.012	1.384	0.994	0.969	0.968	0.937	1.041	1.025	1.037	1.058	0.924	1.058	1.045	1.129	0.84		1.083	1.13	0.958	1.034	1.013	1.004		1.08	0.128548	0.45	0.11	0.35	1.13	0.123153	0.46	0.17	0.34	0.95	0.0804204	0.62	-0.07	0.21
184	417101	P16403	H12	Histone H1.2	213	21.4	10.93		1.055	1.087	1.04	1.053	1.256	1.014	1.097	1.078	1.054	0.98	1.026	1.029	0.993	0.942	1.031	0.934	1.045	0.83		1.061	1.108	1.076	1.012	0.989	0.936		1.13	0.450346	0.12	0.18	0.92	1.18	0.380924	0.15	0.24	0.82	1.15	0.537407	0.09	0.2	1.04
185	121925	P16402	H13	Histone H1.3	221	22.3	11.02		1.088	1.082	1.062	1.042	1.292	0.976	1.054	1.058	1.053	0.966	1.026	0.999	0.992	0.903	1.011	0.938	1.042	0.83		1.077	1.103	1.055	0.997	0.969	0.937		1.15	0.557533	0.08	0.2	1.07	1.18	0.27943	0.22	0.24	0.66	1.13	0.436986	0.13	0.17	0.9
186	19856407	P16401	H15	Histone H1.5	226	22.6	10.92		1.005	1.047	1.019	1.011	1.05	1.001	0.994	1.029	1.014	0.938	0.978	0.978	0.977	0.965	0.961	0.999	1.008	0.92		1.024	1.021	1.012	0.965	0.968	0.976		1.05	0.315645	0.19	0.07	0.72	1.05	0.268539	0.23	0.07	0.64	1.04	0.209622	0.28	0.05	0.55
187	121992	P16104	H2AX	Histone H2AX	143	15.1	10.74		0.981	1.002	1.003	0.962	1.094	0.958	1.025	0.987	0.966	1.025	0.972	0.993	0.974	0.941	0.947	1	1.014	1.016		0.995	1.005	0.993	0.997	0.954	1.01		0.99	0.36233	0.16	-0.02	0.78	0.99	0.0513179	0.91	-0.01	0.04	0.98	0.147115	0.39	-0.03	0.41
188	74749787	Q71UI9	H2AV	Histone H2A.V	128	13.5	10.58		0.663	0.885	0.893	0.973	0.489	1.066	0.896	1.067	0.998	0.965	0.838	0.891	0.845	1.045	0.925	1.112	0.927	1.485		0.814	0.842	0.987	0.898	0.938	1.175		0.69	0.462326	0.12	-0.53	0.94	0.72	0.254411	0.24	-0.48	0.61	0.84	0.18094	0.34	-0.25	0.47
189	74750623	Q8IUE6	H2A2B	Histone H2A type 2-B	130	14	10.89		0.942	1.088	0.986	1.159	0.596	1.18	1.129	1.235	1.206	0.982	0.908	0.923	1.015	1.067	0.953	1.131	1.057	1.393		1.006	0.978	1.19	0.938	1.012	1.194		0.84	0.357622	0.16	-0.25	0.78	0.82	0.158055	0.38	-0.29	0.42	1	0.0501497	0.97	0	0.01
190	124028530	P04908	H2A1B	Histone H2A type 1-B/E	130	14.1	11.05		0.795	0.943	0.891	0.98	0.593	0.964	0.895	0.962	0.989	0.886	0.841	0.934	0.894	0.956	0.897	1.059	1.043	0.981		0.876	0.846	0.949	0.887	0.915	1.028		0.85	0.800761	0.04	-0.23	1.43	0.82	0.267126	0.23	-0.28	0.64	0.92	0.516805	0.1	-0.12	1.02
191	51316070	Q96A08	H2B1A	Histone H2B type 1-A	127	14.2	10.32		1.035	1.012	0.982	1.04	0.741	1.031	0.996	0.945	1.03	1.302	1.09	1.13	1.341	1.269	1.141	1.206	1.105	1.232		1.01	0.937	0.99	1.174	1.25	1.181		0.86	0.956538	0.01	-0.23	1.83	0.79	0.572298	0.08	-0.33	1.09	0.84	0.960453	0.01	-0.25	1.85
192	7404367	P06899	H2B1J	Histone H2B type 1-J	126	13.9	10.32		2.108	0.988	0.893	0.489	7.94	0.409	1.283	0.573	0.657	1.043	1.084	0.787	0.779	0.186	0.671	0.21	0.833	0.123		1.33	2.946	0.838	0.971	0.545	0.388		3.42	0.4963	0.1	1.78	0.98	7.58	0.163286	0.37	2.92	0.44	2.16	0.269245	0.23	1.11	0.64
193	7387742	Q99879	H2B1M	Histone H2B type 1-M	126	14	10.32		0.809	0.958	0.926	1.02	0.524	1.099	1.024	1.177	0.968	0.974	0.891	0.901	0.939	1.048	1.049	1.159	0.953	1.241		0.898	0.881	1.057	0.922	1.012	1.118		0.8	0.558056	0.09	-0.32	1.07	0.79	0.204017	0.3	-0.34	0.52	0.95	0.0856289	0.59	-0.08	0.23
194	55977055	P68431	H31	Histone H3.1	136	15.4	11.12		1.053	1.13	1.081	1.115	0.956	1.144	1.119	1.088	1.067	0.914	0.923	0.886	0.975	0.991	0.988	1.044	0.999	1.085		1.088	1.072	1.091	0.908	0.985	1.043		1.04	0.245977	0.25	0.06	0.6	1.03	0.0723767	0.67	0.04	0.17	1.05	0.342044	0.17	0.07	0.77
195	55977062	P84243	H33	Histone H3.3	136	15.3	11.27		0.996	1.094	0.986	1.063	0.949	1.067	1.042	1.023	1.087	0.973	0.991	0.948	1.047	1.075	1.033	1.054	0.958	1.288		1.025	1.026	1.051	0.971	1.051	1.1		0.93	0.106345	0.51	-0.1	0.29	0.93	0.103294	0.52	-0.1	0.28	0.96	0.0758721	0.65	-0.07	0.19
196	74758899	Q71DI3	H32	Histone H3.2	136	15.4	11.27		1.032	1.021	1.007	0.999	0.975	1.014	1.183	1.113	1.074	0.969	0.99	0.943	1.051	1.047	1.012	1.106	1.001	1.196		1.02	0.996	1.123	0.967	1.036	1.101		0.93	0.27042	0.23	-0.11	0.64	0.9	0.401726	0.14	-0.14	0.85	1.02	0.0623501	0.75	0.03	0.13
197	51317339	P62805	H4	Histone H4	103	11.4	11.36		0.889	0.951	0.951	1.004	0.812	1.021	1.015	1.064	0.963	0.918	0.903	0.904	0.921	0.987	0.954	1.069	0.925	1.117		0.931	0.945	1.014	0.909	0.954	1.037		0.9	0.368404	0.16	-0.16	0.8	0.91	0.167831	0.36	-0.13	0.44	0.98	0.0635466	0.74	-0.03	0.13
198	130848	P25786	PSA1	Proteasome subunit alpha type-1	263	29.5	6.61		0.952	1.017	1.042	1.058	0.853	1.029	1.024	1.044	1.062	0.978	0.998	1.015	1.011	1.018	1.018	1.008	1.023	0.949		1.004	0.98	1.043	0.997	1.016	0.993		1.01	0.06052	0.79	0.01	0.1	0.99	0.0539086	0.85	-0.02	0.07	1.05	0.459513	0.12	0.07	0.93
199	130850	P25787	PSA2	Proteasome subunit alpha type-2	234	25.9	7.43		0.989	0.952	1.017	1.025	1.117	1.015	1.008	1.03	1.019	0.974	1.024	1.051	1.011	0.987	1.055	0.931	0.977	0.864		0.986	1.052	1.019	1.017	1.018	0.924		1.07	0.338003	0.17	0.09	0.76	1.14	0.720908	0.05	0.19	1.3	1.1	0.740741	0.05	0.14	1.33
200	130859	P25788	PSA3	Proteasome subunit alpha type-3	255	28.4	5.33		0.946	0.966	0.991	0.989	1.157	0.986	1.006	0.987	1.034	0.969	0.992	0.998	1.021	0.984	0.995	1.002	0.985	0.97		0.968	1.044	1.009	0.986	1	0.986		0.98	0.188452	0.32	-0.03	0.5	1.06	0.161651	0.37	0.08	0.43	1.02	0.26126	0.23	0.03	0.63
201	130861	P25789	PSA4	Proteasome subunit alpha type-4	261	29.5	7.72		0.978	1.021	1.037	1.064	0.826	1.06	1.022	1.069	1.064	0.915	0.954	0.996	1.025	1.119	1.001	1.125	0.968	1.158		1.012	0.983	1.051	0.955	1.048	1.084		0.93	0.200743	0.31	-0.1	0.51	0.91	0.165345	0.36	-0.14	0.44	0.97	0.0820178	0.62	-0.04	0.21
202	38258905	P28066	PSA5	Proteasome subunit alpha type-5	241	26.4	4.79		0.952	0.944	1.029	1.041	0.867	1.051	1.048	1.079	1.031	0.973	0.992	1.029	1.08	1.032	1.026	1.032	0.981	0.933		0.975	0.986	1.053	0.998	1.046	0.982		0.99	0.0533688	0.88	-0.01	0.06	1	0.0503887	0.95	0.01	0.02	1.07	0.543671	0.09	0.1	1.04
203	46397659	P60900	PSA6	Proteasome subunit alpha type-6	246	27.4	6.76		0.944	0.962	0.97	1.019	0.812	1.039	0.984	1.007	1.024	0.978	1.043	1.012	1.019	1.037	1.061	0.991	0.997	0.981		0.959	0.957	1.005	1.011	1.039	0.989		0.97	0.857072	0.03	-0.05	1.58	0.97	0.070766	0.68	-0.05	0.17	1.02	0.228456	0.27	0.02	0.56
204	12643540	O14818	PSA7	Proteasome subunit alpha type-7	248	27.9	8.46		0.921	0.998	0.969	1.032	1.025	1.028	0.963	1.002	1.032	1.01	1.029	1.043	1.06	0.994	1.049	0.968	1.02	0.932		0.963	1.028	0.999	1.027	1.034	0.974		0.99	0.0611863	0.77	-0.02	0.11	1.06	0.500739	0.1	0.08	0.99	1.03	0.114341	0.48	0.04	0.32
205	130853	P20618	PSB1	Proteasome subunit beta type-1	241	26.5	8.13		0.97	1.015	1.012	1.022	0.894	1.006	0.988	0.996	1.012	0.978	0.996	0.998	1.004	1.066	1.013	1.07	0.991	1.092		0.999	0.974	0.999	0.991	1.028	1.051		0.95	0.303432	0.2	-0.07	0.7	0.93	0.299901	0.2	-0.11	0.69	0.95	0.342448	0.17	-0.07	0.76
206	1709762	P49721	PSB2	Proteasome subunit beta type-2	201	22.8	7.02		0.998	0.981	0.976	1.014	1.057	1.042	0.98	1.008	0.957	1.035	1.073	0.993	1.075	0.999	1.06	0.969	1.056	0.864		0.985	1.037	0.981	1.033	1.045	0.963		1.02	0.066585	0.71	0.03	0.15	1.08	0.23388	0.26	0.11	0.59	1.02	0.0605006	0.76	0.03	0.12
207	20532411	P49720	PSB3	Proteasome subunit beta type-3	205	22.9	6.55		0.965	1.016	1.038	1.057	0.827	1.074	0.968	1.072	1.067	0.955	0.979	0.988	0.948	1.001	0.963	0.997	0.956	0.98		1.007	0.986	1.036	0.974	0.971	0.978		1.03	0.200443	0.31	0.04	0.51	1.01	0.0510516	0.93	0.01	0.03	1.06	0.330365	0.18	0.08	0.74
208	116242733	P28070	PSB4	Proteasome subunit beta type-4	264	29.2	5.97		0.939	0.994	0.937	0.971	0.839	1.058	1.077	0.998	1.056	1.016	1.073	1.024	1.025	0.954	1.011	0.981	1.059	0.937		0.957	0.956	1.044	1.038	0.997	0.993		0.96	0.136795	0.42	-0.05	0.37	0.96	0.0776135	0.64	-0.05	0.19	1.05	0.204757	0.3	0.07	0.53
209	187608890	P28074	PSB5	Proteasome subunit beta type-5	263	28.5	6.92		1.001	1.006	0.993	1.059	0.983	1.037	1.058	1.01	1.031	0.98	1.001	1.01	0.986	1.027	0.999	0.957	0.975	1.011		1	1.026	1.033	0.997	1.004	0.981		1.02	0.19764	0.3	0.03	0.53	1.05	0.335115	0.17	0.07	0.76	1.05	0.624438	0.07	0.07	1.16
210	20532407	P28072	PSB6	Proteasome subunit beta type-6	239	25.3	4.92		0.974	0.945	0.989	0.911	1.13	0.955	0.975	1.006	0.954	1.043	1.017	1.037	1.016	0.973	1.011	0.964	1.007	0.836		0.969	0.999	0.978	1.033	1	0.936		1.04	0.0918561	0.56	0.05	0.25	1.07	0.110376	0.5	0.09	0.3	1.05	0.116657	0.47	0.06	0.33
211	17380263	Q99436	PSB7	Proteasome subunit beta type-7	277	29.9	7.68		1.07	1.009	1.005	1.044	1.274	1.008	1.039	1.033	1.075	1.037	1.065	1.031	1.039	0.994	1.043	0.971	1.034	0.882		1.028	1.109	1.049	1.045	1.025	0.962		1.07	0.248359	0.25	0.1	0.6	1.15	0.312022	0.19	0.2	0.71	1.09	0.424268	0.13	0.12	0.88
212	334302881	P28062	PSB8	Proteasome subunit beta type-8	276	30.3	7.43		1.02	1.194	1.016	1.133	1.208	1.067	1.057	1.242	0.957	1.098	0.966	1.145	1.135	1.331	1.352	1.393	1.137	1.362		1.077	1.136	1.085	1.07	1.273	1.297		0.83	0.535373	0.09	-0.27	1.04	0.88	0.38615	0.15	-0.19	0.83	0.84	0.401554	0.14	-0.26	0.85
213	417529	P28065	PSB9	Proteasome subunit beta type-9	219	23.2	5.03		0.899	1.002	1.046	1.002	0.737	1.008	0.886	1.029	0.988	0.92	1.05	1.021	1.001	1.031	1.08	1.141	1.069	1.012		0.982	0.915	0.968	0.997	1.037	1.074		0.91	0.326396	0.19	-0.13	0.73	0.85	0.338948	0.18	-0.23	0.75	0.9	0.418116	0.13	-0.15	0.87
214	223590263	Q13098	CSN1	COP9 signalosome complex subunit 1	491	55.5	6.74		1.094	1.027	0.985	1.009	0.979	0.957	0.983	1.017	1.018	0.926	0.977	0.981	1.054	0.991	0.975	0.898	1.085	0.893		1.035	0.982	1.006	0.961	1.007	0.959		1.08	0.175796	0.34	0.11	0.47	1.02	0.0634148	0.74	0.03	0.13	1.05	0.10791	0.51	0.07	0.3
215	47117681	P61201	CSN2	COP9 signalosome complex subunit 2	443	51.6	5.53		0.993	0.949	1.023	1.008	0.874	1.036	1.076	1.03	1.028	0.94	0.983	1.051	1.036	1.13	1.031	1.146	0.965	1.135		0.988	0.973	1.044	0.991	1.066	1.082		0.91	0.29518	0.21	-0.13	0.68	0.9	0.26726	0.23	-0.15	0.64	0.97	0.0923184	0.57	-0.05	0.25
216	55976621	Q9UNS2	CSN3	COP9 signalosome complex subunit 3	423	47.8	6.65		0.957	0.976	0.948	0.938	0.944	1.013	0.955	0.927	0.96	0.958	1.006	0.966	1.026	1.004	0.992	0.996	0.96	1.104		0.96	0.965	0.947	0.977	1.007	1.02		0.94	0.251589	0.25	-0.09	0.61	0.95	0.184418	0.33	-0.08	0.48	0.93	0.338813	0.18	-0.11	0.75
217	55976582	Q9BT78	CSN4	COP9 signalosome complex subunit 4	406	46.2	5.83		0.943	0.948	0.992	0.959	1.151	0.975	0.978	1.03	1.007	0.976	1.026	1.021	1.004	1.07	1.048	1.029	0.961	1.036		0.961	1.029	1.005	1.008	1.04	1.009		0.95	0.352247	0.17	-0.07	0.77	1.02	0.059816	0.78	0.03	0.11	1	0.0521364	0.9	-0.01	0.05
218	55976562	Q92905	CSN5	COP9 signalosome complex subunit 5	334	37.6	6.54		0.904	0.998	1.029	1.017	0.884	1.048	0.995	1.074	1.041	0.977	0.988	0.996	1.011	1.037	1.032	1.031	0.957	1.053		0.977	0.983	1.037	0.987	1.027	1.014		0.96	0.115715	0.48	-0.05	0.32	0.97	0.0806235	0.63	-0.04	0.2	1.02	0.0916803	0.57	0.03	0.24
219	55976470	Q7L5N1	CSN6	COP9 signalosome complex subunit 6	327	36.1	5.73		1.105	1.013	1.022	1.04	0.921	0.973	0.976	1.02	1.071	0.88	0.97	0.961	0.963	0.955	0.992	0.882	0.995	0.883		1.047	0.978	1.022	0.937	0.97	0.92		1.14	0.689787	0.06	0.19	1.25	1.06	0.191327	0.32	0.09	0.5	1.11	0.531599	0.09	0.15	1.04
220	55976618	Q9UBW8	CSN7A	COP9 signalosome complex subunit 7a	275	30.3	8.22		0.879	0.948	0.891	0.939	0.846	0.937	0.901	0.937	0.851	1.052	1.084	1.039	1.002	0.955	1.034	0.876	0.986	0.856		0.906	0.908	0.896	1.059	0.997	0.906		1	0.05	0.99	0	0	1	0.0501656	0.98	0	0.01	0.99	0.0547317	0.84	-0.02	0.07
221	55976572	Q99627	CSN8	COP9 signalosome complex subunit 8	209	23.2	5.38		0.919	0.925	0.947	0.979	0.928	0.949	1.007	1.018	0.931	1.069	1.112	1.143	1.119	0.976	1.032	1.006	1	0.898		0.93	0.952	0.985	1.108	1.043	0.968		0.96	0.170882	0.36	-0.06	0.45	0.98	0.0689598	0.7	-0.02	0.16	1.02	0.065658	0.72	0.03	0.14
222	3123225	P21399	ACOC	Cytoplasmic aconitate hydratase	889	98.3	6.68		1.013	1.037	1.052	1.054	1.151	1.03	0.956	0.969	0.976	1.007	0.993	1.053	0.954	1.114	1.109	1.002	0.961	1.168		1.034	1.078	0.967	1.017	1.059	1.043		0.99	0.052089	0.89	-0.01	0.05	1.03	0.0744707	0.66	0.05	0.18	0.93	0.205749	0.3	-0.11	0.53
223	6686275	Q99798	ACON	Aconitate hydratase, mitochondrial	780	85.4	7.61		1.102	1.061	0.988	1.004	1.054	1.034	1.076	1.032	1.047	1.058	1.012	0.966	0.996	0.908	0.97	0.956	1.039	0.9		1.05	1.031	1.052	1.012	0.958	0.965		1.09	0.332777	0.18	0.12	0.74	1.07	0.305185	0.2	0.09	0.7	1.09	0.481168	0.11	0.12	0.95
224	57015285	O75390	CISY	Citrate synthase, mitochondrial	466	51.7	8.32		0.979	1.014	0.964	1.003	0.836	1.021	1.06	1.031	1.024	1.06	0.997	0.991	0.976	0.959	0.948	1.035	1.04	0.961		0.986	0.953	1.038	1.016	0.961	1.012		0.97	0.134167	0.42	-0.04	0.38	0.94	0.14176	0.41	-0.09	0.39	1.03	0.144936	0.4	0.04	0.4
225	1169337	P31040	SDHA	Succinate dehydrogenase [ubiquinone] flavoprotein subunit, mitochondrial	664	72.6	7.39		1.011	0.992	0.989	1.011	0.869	0.979	1.075	1.054	1.048	1.063	0.957	0.964	0.976	0.986	0.987	1.046	0.969	1.065		0.997	0.953	1.059	0.995	0.983	1.027		0.97	0.157719	0.39	-0.04	0.41	0.93	0.269061	0.23	-0.11	0.64	1.03	0.170065	0.35	0.04	0.46
226	20455488	P21912	SDHB	Succinate dehydrogenase [ubiquinone] iron-sulfur subunit, mitochondrial	280	31.6	8.76		1.101	1.02	0.956	1.077	1.113	1.039	1.01	1.022	1.07	1.078	1.103	0.942	1.008	0.915	0.945	1.02	1.091	0.964		1.025	1.076	1.034	1.041	0.956	1.025		1	0.05	1	0	0	1.05	0.206788	0.29	0.07	0.53	1.01	0.055126	0.84	0.01	0.08
227	1730117	P07954	FUMH	Fumarate hydratase, mitochondrial	510	54.6	8.76		0.877	0.971	0.96	1.012	0.75	1.011	0.974	1.008	1.011	1.016	1	0.972	0.972	0.997	1.002	1.041	0.999	1.075		0.936	0.924	0.998	0.996	0.99	1.038		0.9	0.717697	0.05	-0.15	1.3	0.89	0.22504	0.27	-0.17	0.56	0.96	0.325608	0.18	-0.06	0.75
228	1708399	P50213	IDH3A	Isocitrate dehydrogenase [NAD] subunit alpha, mitochondrial	366	39.6	6.92		0.941	1.027	1.014	0.989	0.859	0.97	1.068	1	1.025	1.003	0.96	0.939	0.925	0.945	0.913	0.975	0.963	1.05		0.994	0.94	1.031	0.967	0.928	0.996		1	0.0502924	0.96	0	0.02	0.94	0.193255	0.31	-0.08	0.51	1.03	0.167443	0.36	0.05	0.44
229	146345439	O43837	IDH3B	Isocitrate dehydrogenase [NAD] subunit beta, mitochondrial	385	42.2	8.46		0.958	0.938	0.955	0.897	0.909	0.956	0.985	1.067	0.927	0.994	1.05	0.97	0.963	0.942	0.965	1.036	1.101	1.051		0.95	0.921	0.993	1.005	0.957	1.063		0.89	0.997707	0.01	-0.16	2.27	0.87	0.996648	0.01	-0.21	2.23	0.93	0.3095	0.2	-0.1	0.71
230	1708404	P51553	IDH3G	Isocitrate dehydrogenase [NAD] subunit gamma, mitochondrial	393	42.8	8.5		0.978	0.977	0.92	0.96	0.778	0.997	1.078	1.12	0.972	1.026	0.959	0.948	0.925	0.962	0.994	0.991	1.041	1.038		0.958	0.912	1.057	0.978	0.96	1.023		0.94	0.665241	0.06	-0.09	1.21	0.89	0.323527	0.18	-0.17	0.74	1.03	0.106771	0.52	0.05	0.29
231	21903432	O75874	IDHC	Isocitrate dehydrogenase [NADP] cytoplasmic	414	46.6	7.01		0.963	0.932	0.941	1.014	0.896	1.013	0.958	1.006	1.029	0.943	0.977	0.986	1.039	1.074	1.044	0.992	0.966	0.995		0.946	0.974	0.998	0.969	1.052	0.984		0.96	0.761337	0.04	-0.06	1.37	0.99	0.0565952	0.82	-0.01	0.09	1.01	0.0904397	0.59	0.02	0.23
232	20141568	P48735	IDHP	Isocitrate dehydrogenase [NADP], mitochondrial	452	50.9	8.69		1.014	1.033	0.982	1.043	0.844	1.031	1.081	1.062	1.066	0.991	0.935	0.939	0.923	0.967	0.915	1.003	0.974	1.073		1.009	0.973	1.069	0.955	0.935	1.017		0.99	0.0562979	0.84	-0.01	0.08	0.96	0.0916123	0.57	-0.06	0.25	1.05	0.370629	0.15	0.07	0.81
233	1708967	P40925	MDHC	Malate dehydrogenase, cytoplasmic	334	36.4	7.36		0.903	0.955	0.999	1.017	0.743	1.045	0.969	1.048	1.041	0.928	0.988	0.99	1.017	1.089	1.071	0.961	0.936	1.035		0.952	0.935	1.02	0.969	1.059	0.977		0.97	0.0907366	0.57	-0.04	0.25	0.96	0.0685959	0.7	-0.06	0.16	1.04	0.182403	0.34	0.06	0.47
234	215274114	P40926	MDHM	Malate dehydrogenase, mitochondrial	338	35.5	8.68		1.052	1.056	0.995	1.032	0.861	1	1.11	1.04	1.035	1.034	0.975	0.972	0.987	0.978	0.972	1.054	1.031	1.046		1.034	0.964	1.062	0.994	0.979	1.044		0.99	0.0747575	0.68	-0.01	0.17	0.92	0.296893	0.21	-0.11	0.68	1.02	0.105445	0.51	0.03	0.3
235	160332299	Q02218	ODO1	2-oxoglutarate dehydrogenase, mitochondrial	1023	115.9	6.86		0.904	1.02	0.955	1.002	0.848	0.988	1.05	1.125	1.053	1.073	1.021	0.93	0.973	0.955	0.978	1.024	1.004	1.013		0.96	0.946	1.076	1.008	0.969	1.014		0.95	0.320378	0.19	-0.08	0.72	0.93	0.254912	0.24	-0.1	0.61	1.06	0.623253	0.07	0.09	1.17
236	223634731	P53597	SUCA	Succinyl-CoA ligase [ADP/GDP-forming] subunit alpha, mitochondrial	346	36.2	8.79		1.059	1.022	1.023	1.02	0.937	1.021	1.101	1.034	1.047	1.035	0.995	0.974	0.978	0.964	0.94	1.024	1.008	1.032		1.035	0.993	1.061	1.001	0.961	1.021		1.01	0.157745	0.4	0.02	0.4	0.97	0.153399	0.37	-0.04	0.43	1.04	0.407732	0.14	0.05	0.84
237	94730427	Q9P2R7	SUCB1	Succinyl-CoA ligase [ADP-forming] subunit beta, mitochondrial	463	50.3	7.42		1.03	1.066	1.015	1.052	0.834	0.995	1.072	1.03	1.036	1.036	1.002	0.942	0.988	0.994	0.96	1.081	1.007	1.127		1.037	0.96	1.046	0.994	0.98	1.072		0.97	0.141727	0.42	-0.05	0.38	0.9	0.297147	0.21	-0.16	0.68	0.98	0.102388	0.53	-0.03	0.27
238	52788292	Q96I99	SUCB2	Succinyl-CoA ligase [GDP-forming] subunit beta, mitochondrial	432	46.5	6.39		0.988	1.006	1.027	0.991	1.032	0.971	1.093	1.029	1.055	0.942	0.954	0.97	0.923	0.997	0.984	1.066	0.929	1.087		1.007	0.998	1.059	0.956	0.968	1.028		0.98	0.0683068	0.71	-0.03	0.15	0.97	0.0848825	0.6	-0.04	0.22	1.03	0.0869587	0.59	0.04	0.23
239	6093488	O43678	NDUA2	NADH dehydrogenase [ubiquinone] 1 alpha subcomplex subunit 2	99	10.9	9.57		1.063	1.046	1.057	1.076	1.116	1.006	1.057	1.063	0.957	0.955	0.941	0.961	0.949	0.964	1	1.021	0.953	0.998		1.055	1.066	1.026	0.952	0.971	0.99		1.07	0.820265	0.03	0.09	1.46	1.08	0.465576	0.12	0.11	0.93	1.04	0.139051	0.42	0.05	0.37
240	2499333	O00483	NDUA4	Cytochrome c oxidase subunit NDUFA4	81	9.4	9.38		0.863	0.987	0.983	1.005	0.626	1.084	0.96	0.936	0.9	1.039	0.994	0.946	1.008	1.108	1.005	1.147	1.025	1.22		0.944	0.905	0.932	0.993	1.04	1.131		0.84	0.691248	0.06	-0.26	1.25	0.8	0.287982	0.21	-0.32	0.67	0.82	0.858844	0.03	-0.28	1.54
241	2499316	Q16718	NDUA5	NADH dehydrogenase [ubiquinone] 1 alpha subcomplex subunit 5	116	13.5	5.99		1.011	1.053	1.079	0.984	1.112	1.022	1.176	1.087	0.985	1.01	0.993	0.958	0.979	0.912	0.955	1.162	1.008	1.092		1.047	1.039	1.083	0.987	0.949	1.087		0.96	0.123042	0.46	-0.05	0.34	0.96	0.12297	0.46	-0.07	0.34	1	0.0503392	0.95	-0.01	0.02
242	298286909	P56556	NDUA6	NADH dehydrogenase [ubiquinone] 1 alpha subcomplex subunit 6	154	17.9	10.14		0.833	0.874	0.882	0.895	0.753	0.983	0.957	0.854	0.979	0.928	0.959	0.955	0.936	0.996	0.929	0.967	0.971	1.296		0.863	0.877	0.93	0.947	0.954	1.078		0.8	0.446197	0.12	-0.32	0.91	0.81	0.315711	0.19	-0.3	0.72	0.86	0.228332	0.27	-0.21	0.57
243	8039804	P51970	NDUA8	NADH dehydrogenase [ubiquinone] 1 alpha subcomplex subunit 8	172	20.1	7.65		0.786	0.93	0.814	0.903	0.628	0.921	0.907	1.026	0.852	1.019	0.947	0.975	0.956	1.026	0.988	0.961	0.99	0.982		0.843	0.817	0.928	0.981	0.99	0.977		0.86	0.778242	0.04	-0.21	1.39	0.84	0.351806	0.17	-0.26	0.77	0.95	0.146234	0.4	-0.07	0.4
244	2833280	Q16795	NDUA9	NADH dehydrogenase [ubiquinone] 1 alpha subcomplex subunit 9, mitochondrial	377	42.5	9.8		1.012	0.997	0.964	1	0.84	0.981	1.238	1.176	1.182	1.056	0.992	0.978	0.952	0.936	0.896	1.006	0.998	1.064		0.991	0.94	1.199	1.009	0.928	1.023		0.97	0.225944	0.28	-0.05	0.55	0.92	0.299677	0.21	-0.12	0.69	1.17	0.999608	0	0.23	2.44
245	6093592	O95299	NDUAA	NADH dehydrogenase [ubiquinone] 1 alpha subcomplex subunit 10, mitochondrial	355	40.7	8.48		0.965	1.072	0.935	0.994	0.914	1.026	1.083	1.061	0.975	1.107	1.036	1.027	1.018	0.964	1.026	0.995	1.052	0.888		0.991	0.978	1.039	1.057	1.003	0.978		1.01	0.0544637	0.85	0.02	0.07	1	0.05	1	0	0	1.06	0.169255	0.35	0.09	0.45
246	52000823	Q86Y39	NDUAB	NADH dehydrogenase [ubiquinone] 1 alpha subcomplex subunit 11	141	14.8	8.72		0.977	0.968	1.11	1.096	1.089	1.005	1.233	0.993	1.148	0.955	1.095	1.036	0.919	0.933	0.986	0.901	0.989	0.791		1.019	1.064	1.125	1.028	0.946	0.893		1.14	0.363917	0.16	0.19	0.79	1.19	0.686695	0.06	0.25	1.24	1.26	0.655294	0.06	0.33	1.2
247	20139242	Q9P0J0	NDUAD	NADH dehydrogenase [ubiquinone] 1 alpha subcomplex subunit 13	144	16.7	8.43		1.062	1.099	1.03	1.083	1.058	1.011	1.048	0.98	0.909	1.068	1.032	1.012	0.977	1.005	0.998	1.037	1.022	0.935		1.064	1.05	0.979	1.037	0.994	0.998		1.07	0.37824	0.15	0.09	0.82	1.05	0.251697	0.24	0.07	0.62	0.98	0.0647407	0.73	-0.03	0.14
248	21903370	O14561	ACPM	Acyl carrier protein, mitochondrial	156	17.4	4.93		1.011	1.058	0.957	1.038	0.766	0.97	1.076	1.008	1.131	1.063	1.008	0.943	0.998	0.983	0.976	1.041	1.012	0.914		1.009	0.925	1.072	1.005	0.986	0.989		1.02	0.0684125	0.7	0.03	0.15	0.93	0.104268	0.52	-0.1	0.29	1.08	0.320306	0.19	0.12	0.73
249	6093472	O43676	NDUB3	NADH dehydrogenase [ubiquinone] 1 beta subcomplex subunit 3	98	11.4	9.2		0.912	0.986	0.969	1.064	0.689	1.148	1.156	1.26	1.156	0.989	0.949	0.927	0.961	1.076	0.945	1.08	0.988	1.292		0.956	0.967	1.191	0.955	0.994	1.12		0.85	0.381535	0.15	-0.23	0.82	0.86	0.140779	0.41	-0.21	0.38	1.06	0.108595	0.5	0.09	0.3
250	6093473	O95168	NDUB4	NADH dehydrogenase [ubiquinone] 1 beta subcomplex subunit 4	129	15.2	9.85		0.975	0.984	0.896	0.987	0.878	0.968	0.999	0.937	0.961	0.974	1.045	0.99	0.993	0.831	0.943	0.997	1.045	0.831		0.952	0.944	0.966	1.003	0.922	0.958		0.99	0.0507696	0.93	-0.01	0.03	0.99	0.0539204	0.86	-0.02	0.06	1.01	0.0515063	0.91	0.01	0.04
251	6093510	O43674	NDUB5	NADH dehydrogenase [ubiquinone] 1 beta subcomplex subunit 5, mitochondrial	189	21.7	9.63		0.978	1.031	0.949	0.983	0.907	1.001	1.057	1.018	1.003	1.133	0.955	1.038	1.003	0.999	0.962	1.065	1.068	1.171		0.986	0.964	1.026	1.042	0.988	1.101		0.9	0.704503	0.05	-0.16	1.28	0.87	0.790132	0.04	-0.19	1.42	0.93	0.446396	0.12	-0.1	0.92
252	6093474	O95139	NDUB6	NADH dehydrogenase [ubiquinone] 1 beta subcomplex subunit 6	128	15.5	9.63		0.988	0.967	0.887	0.957	1.231	1.127	1.069	1.078	1.004	1.198	1.205	1.082	1.088	0.97	0.997	1.086	1.108	1.12		0.947	1.105	1.05	1.162	1.018	1.105		0.86	0.990689	0.01	-0.22	2.08	1	0.05	0.99	0	0	0.95	0.522766	0.1	-0.07	1.02
253	12644140	P17568	NDUB7	NADH dehydrogenase [ubiquinone] 1 beta subcomplex subunit 7	137	16.4	8.92		1.036	1.063	0.952	1.023	1.231	0.921	1.161	1.046	0.981	1.009	1.004	0.957	0.921	0.814	0.825	0.969	0.935	0.895		1.017	1.058	1.063	0.99	0.853	0.933		1.09	0.504138	0.1	0.12	0.99	1.13	0.243519	0.25	0.18	0.6	1.14	0.564382	0.08	0.19	1.07
254	6093490	O95169	NDUB8	NADH dehydrogenase [ubiquinone] 1 beta subcomplex subunit 8, mitochondrial	186	21.8	6.8		1.152	0.963	0.91	0.942	1.216	0.893	1.139	0.978	0.998	1.061	0.985	0.96	1.019	0.902	0.939	1.033	1.044	0.958		1.008	1.017	1.038	1.002	0.953	1.012		1	0.0502784	0.97	-0.01	0.02	1.01	0.0502459	0.96	0.01	0.02	1.03	0.0719923	0.67	0.04	0.18
255	8134589	Q9Y6M9	NDUB9	NADH dehydrogenase [ubiquinone] 1 beta subcomplex subunit 9	179	21.8	8.38		1.038	1.097	1.005	0.932	0.755	0.991	1.13	1.057	0.985	1.032	1.008	0.986	0.931	0.963	0.99	1.014	1.05	1.021		1.047	0.893	1.057	1.009	0.961	1.028		1.02	0.0960571	0.56	0.03	0.26	0.87	0.420763	0.13	-0.2	0.88	1.03	0.0984476	0.54	0.04	0.27
256	6093491	O96000	NDUBA	NADH dehydrogenase [ubiquinone] 1 beta subcomplex subunit 10	172	20.8	8.48		1.017	1.001	0.991	1.025	0.784	1.009	1.084	1.042	1	0.851	0.773	0.797	0.853	1.139	0.84	1.28	0.966	1.706		1.003	0.939	1.042	0.807	0.944	1.317		0.76	0.281857	0.22	-0.39	0.66	0.71	0.343944	0.17	-0.49	0.76	0.79	0.226737	0.27	-0.34	0.57
257	32469787	Q9NX14	NDUBB	NADH dehydrogenase [ubiquinone] 1 beta subcomplex subunit 11, mitochondrial	153	17.3	5.22		1.077	1.032	1.042	0.987	1.276	1.038	1.151	1.089	0.998	1.133	1.049	0.999	0.997	0.946	1.031	1.001	1.117	0.942		1.05	1.1	1.079	1.06	0.991	1.02		1.03	0.0842359	0.6	0.04	0.22	1.08	0.115528	0.48	0.11	0.32	1.06	0.131823	0.43	0.08	0.36
258	6093464	O95298	NDUC2	NADH dehydrogenase [ubiquinone] 1 subunit C2	119	14.2	8.98		1.004	1.088	1.115	1.041	0.845	1.13	1.061	1.032	1.019	1.03	1.147	1.064	1.135	1.088	1.238	1.301	1.281	1.023		1.069	1.005	1.037	1.08	1.154	1.202		0.89	0.260288	0.24	-0.17	0.63	0.84	0.326166	0.19	-0.26	0.73	0.86	0.401375	0.14	-0.21	0.85
259	92090799	P28331	NDUS1	NADH-ubiquinone oxidoreductase 75 kDa subunit, mitochondrial	727	79.4	6.23		1.038	1.051	0.966	0.983	1.059	0.956	1.019	0.932	0.931	1.045	0.985	0.975	0.975	0.924	1.008	1.018	1.011	1.002		1.018	1	0.96	1.002	0.969	1.01		1.01	0.0594963	0.78	0.01	0.11	0.99	0.0609971	0.75	-0.02	0.13	0.95	0.355961	0.17	-0.07	0.78
260	20178314	O75306	NDUS2	NADH dehydrogenase [ubiquinone] iron-sulfur protein 2, mitochondrial	463	52.5	7.55		0.91	1.039	0.972	0.978	0.843	0.931	0.945	0.982	0.969	1.027	0.976	1.023	0.995	0.992	1.008	0.995	0.997	1.016		0.974	0.917	0.965	1.009	0.999	1.003		0.97	0.113552	0.49	-0.04	0.31	0.91	0.513379	0.1	-0.13	1	0.96	0.778369	0.04	-0.05	1.39
261	6166589	O75489	NDUS3	NADH dehydrogenase [ubiquinone] iron-sulfur protein 3, mitochondrial	264	30.2	7.5		1.068	1.007	0.998	1.009	1.008	0.997	1.072	0.991	1.065	1.007	0.99	1.02	0.962	0.964	0.975	1.105	1.029	0.986		1.025	1.005	1.043	1.006	0.967	1.04		0.98	0.0642165	0.72	-0.02	0.14	0.97	0.158781	0.37	-0.05	0.43	1	0.0505096	0.96	0	0.02
262	3914138	O43920	NDUS5	NADH dehydrogenase [ubiquinone] iron-sulfur protein 5	106	12.5	9.14		0.895	0.978	1.066	1.02	0.783	1.015	1.074	0.91	0.973	0.958	0.945	0.91	0.842	1.075	0.938	1.071	0.976	1.272		0.98	0.939	0.986	0.938	0.952	1.106		0.89	0.22195	0.27	-0.18	0.56	0.85	0.27031	0.23	-0.24	0.65	0.89	0.208494	0.29	-0.17	0.53
263	6093600	O75380	NDUS6	NADH dehydrogenase [ubiquinone] iron-sulfur protein 6, mitochondrial	124	13.7	8.28		1.081	1.006	1.017	0.932	1.319	0.898	1.026	0.927	0.869	1	0.907	0.905	0.913	0.788	0.882	0.889	0.943	0.803		1.034	1.05	0.941	0.937	0.861	0.878		1.18	0.853957	0.03	0.24	1.53	1.2	0.211948	0.29	0.26	0.54	1.07	0.164803	0.37	0.1	0.43
264	20455499	P19404	NDUV2	NADH dehydrogenase [ubiquinone] flavoprotein 2, mitochondrial	249	27.4	8.06		1.019	0.922	1.113	1.101	0.898	0.975	1.118	1.261	0.798	1.027	0.977	0.903	0.97	1.003	0.957	0.983	0.959	1.081		1.018	0.991	1.059	0.969	0.977	1.008		1.01	0.0524053	0.88	0.01	0.05	0.98	0.0563053	0.83	-0.02	0.08	1.05	0.0638287	0.74	0.07	0.13
265	311033458	P08574	CY1	Cytochrome c1, heme protein, mitochondrial	325	35.4	9		0.917	0.967	0.886	0.976	1.094	0.965	1.002	0.964	0.985	1.037	1.018	0.936	1.019	1.06	0.975	1.117	1.087	1.154		0.923	1.012	0.983	0.997	1.018	1.119		0.82	0.999829	0	-0.28	2.53	0.9	0.584218	0.08	-0.15	1.11	0.88	0.999569	0	-0.19	2.45
266	92090651	P31930	QCR1	Cytochrome b-c1 complex subunit 1, mitochondrial	480	52.6	6.37		1.036	1.083	1.037	1.015	0.864	1.028	1.115	1.081	1.089	1.056	0.98	0.988	0.963	0.933	0.977	1.047	1.065	0.981		1.052	0.969	1.095	1.008	0.958	1.031		1.02	0.103392	0.52	0.03	0.28	0.94	0.172285	0.35	-0.09	0.46	1.06	0.577204	0.08	0.09	1.09
267	21903482	P22695	QCR2	Cytochrome b-c1 complex subunit 2, mitochondrial	453	48.4	8.63		1.004	1.015	1.005	1.053	0.849	0.99	1.05	0.975	0.989	1.011	0.999	0.947	0.975	0.96	0.932	1.023	1.016	1.003		1.008	0.964	1.005	0.986	0.956	1.014		0.99	0.133729	0.44	-0.01	0.36	0.95	0.123814	0.45	-0.07	0.34	0.99	0.065363	0.72	-0.01	0.14
268	20455515	P07919	QCR6	Cytochrome b-c1 complex subunit 6, mitochondrial	91	10.7	4.44		1.124	1.033	0.916	0.97	1.143	0.949	1.105	1.029	1.023	1.141	1	0.894	0.996	0.851	0.987	1.086	1.125	0.984		1.024	1.02	1.053	1.012	0.944	1.065		0.96	0.0835432	0.61	-0.06	0.22	0.96	0.0893383	0.58	-0.06	0.24	0.99	0.0562404	0.81	-0.02	0.09
269	136717	P14927	QCR7	Cytochrome b-c1 complex subunit 7	111	13.5	8.78		0.95	0.999	1.027	1.031	0.734	1.066	0.971	1.048	0.997	0.82	0.916	0.861	0.882	1.065	0.903	1.159	0.884	1.453		0.992	0.944	1.005	0.866	0.95	1.165		0.85	0.168482	0.36	-0.23	0.45	0.81	0.189692	0.32	-0.3	0.5	0.86	0.151211	0.39	-0.21	0.41
270	20141846	O14949	QCR8	Cytochrome b-c1 complex subunit 8	82	9.9	10.08		1.165	1.044	1.008	0.943	1.094	0.984	1.043	1.011	0.993	1.024	0.998	0.966	0.933	0.849	0.97	0.978	1.049	0.878		1.072	1.007	1.016	0.996	0.917	0.968		1.11	0.297773	0.21	0.15	0.69	1.04	0.0864468	0.59	0.06	0.23	1.05	0.143624	0.41	0.07	0.39
271	143811471	P47985	UCRI	Cytochrome b-c1 complex subunit Rieske, mitochondrial	274	29.6	8.32		1.058	0.998	0.984	0.995	1.171	1.008	1.034	0.969	0.991	1.082	1.038	0.969	1	0.941	0.984	1.035	1.03	0.911		1.013	1.058	0.998	1.03	0.975	0.992		1.02	0.0719239	0.68	0.03	0.17	1.07	0.147651	0.4	0.09	0.4	1.01	0.0519125	0.9	0.01	0.05
272	117086	P13073	COX41	Cytochrome c oxidase subunit 4 isoform 1, mitochondrial	169	19.6	9.51		0.986	0.981	0.943	0.987	1.097	1.021	1.026	1.006	1.006	0.805	0.817	0.841	0.816	0.985	0.889	1.104	0.809	1.389		0.97	1.035	1.012	0.821	0.897	1.101		0.88	0.115839	0.48	-0.18	0.32	0.94	0.0660321	0.72	-0.09	0.14	0.92	0.0803212	0.63	-0.12	0.2
273	218511986	P20674	COX5A	Cytochrome c oxidase subunit 5A, mitochondrial	150	16.8	6.79		0.99	1.014	0.993	0.987	0.734	1.002	1.058	1.059	1.013	0.991	0.941	0.958	0.957	0.978	0.956	1.039	0.955	0.975		0.999	0.908	1.043	0.963	0.964	0.99		1.01	0.0623987	0.74	0.01	0.13	0.92	0.139049	0.42	-0.12	0.38	1.05	0.390718	0.14	0.08	0.84
274	20141332	P10606	COX5B	Cytochrome c oxidase subunit 5B, mitochondrial	129	13.7	8.81		1.09	1.049	1.03	1.022	1.298	0.981	1.032	1.016	0.99	1.026	1.002	0.976	0.978	0.89	0.929	0.954	1.002	0.94		1.056	1.1	1.013	1.001	0.933	0.965		1.09	0.890408	0.02	0.13	1.62	1.14	0.243107	0.25	0.19	0.6	1.05	0.512922	0.1	0.07	1.01
275	6166030	P12074	CX6A1	Cytochrome c oxidase subunit 6A1, mitochondrial	109	12.1	9.32		1.001	0.855	0.967	0.914	1.214	0.858	0.978	0.953	0.986	1.212	1.061	0.95	0.978	0.845	1.071	1.06	0.964	0.835		0.941	0.995	0.972	1.074	0.964	0.953		0.99	0.0524787	0.89	-0.02	0.05	1.04	0.0614568	0.76	0.06	0.12	1.02	0.0588715	0.78	0.03	0.11
276	117115	P14854	CX6B1	Cytochrome c oxidase subunit 6B1	86	10.2	7.05		1.067	1.047	1.003	1.026	1.202	1.011	1.097	0.989	1	1.016	0.941	1	0.949	1.02	0.934	0.991	0.969	1.058		1.039	1.08	1.028	0.986	0.968	1.006		1.03	0.160356	0.37	0.05	0.43	1.07	0.183228	0.33	0.1	0.48	1.02	0.0774519	0.63	0.03	0.2
277	1352175	P09669	COX6C	Cytochrome c oxidase subunit 6C	75	8.8	10.39		0.967	1.057	0.948	1.043	0.707	1.005	0.994	1.018	0.948	0.967	1.004	0.963	0.953	0.998	1.038	1.05	1.033	1.07		0.991	0.918	0.986	0.978	0.996	1.051		0.94	0.358602	0.16	-0.09	0.79	0.87	0.218933	0.28	-0.19	0.55	0.94	0.730678	0.05	-0.09	1.31
278	117121	P14406	CX7A2	Cytochrome c oxidase subunit 7A2, mitochondrial	83	9.4	9.76		0.906	0.97	0.977	1.04	0.591	1.091	0.964	1.049	0.971	0.952	0.938	0.958	0.92	1.027	0.893	1.017	0.939	1.261		0.951	0.908	0.995	0.949	0.947	1.073		0.89	0.213449	0.29	-0.17	0.54	0.85	0.135322	0.43	-0.24	0.37	0.93	0.114901	0.48	-0.11	0.32
279	20141187	O14548	COX7R	Cytochrome c oxidase subunit 7A-related protein, mitochondrial	114	12.6	9.42		0.823	0.836	0.907	0.97	0.693	1.023	0.946	0.97	1.031	0.979	0.963	0.973	1.043	1.087	1.062	1.189	1.025	1.338		0.855	0.895	0.982	0.971	1.064	1.184		0.72	0.885653	0.02	-0.47	1.6	0.76	0.504059	0.1	-0.4	0.99	0.83	0.51652	0.1	-0.27	1.01
280	117127	P15954	COX7C	Cytochrome c oxidase subunit 7C, mitochondrial	63	7.2	10.27		0.952	1.076	1.02	1.039	0.876	1.008	1.099	1.091	1	0.975	0.892	0.929	0.923	0.88	0.872	1.046	0.949	1.038		1.016	0.974	1.063	0.932	0.892	1.011		1.01	0.0511833	0.92	0.01	0.04	0.96	0.0926056	0.56	-0.05	0.25	1.05	0.19917	0.31	0.07	0.51
281	117020	P00403	COX2	Cytochrome c oxidase subunit 2	227	25.5	4.82		0.89	0.994	0.983	1.028	0.52	1.028	0.913	1.011	0.938	1.005	0.926	0.974	0.892	1.054	0.916	1.072	1.007	1.258		0.956	0.859	0.954	0.968	0.954	1.112		0.86	0.427159	0.13	-0.22	0.89	0.77	0.252541	0.24	-0.37	0.61	0.86	0.447275	0.12	-0.22	0.92
282	42560196	P99999	CYC	Cytochrome c	105	11.7	9.57		0.866	0.984	0.974	1.004	0.709	1.045	0.987	1.079	1.032	0.954	0.959	0.938	0.978	1.061	0.951	1.131	1.038	1.238		0.941	0.919	1.032	0.95	0.997	1.136		0.83	0.735607	0.05	-0.27	1.32	0.81	0.39236	0.15	-0.3	0.83	0.91	0.336749	0.18	-0.14	0.75
283	20455474	P24539	AT5F1	ATP synthase F(0) complex subunit B1, mitochondrial	256	28.9	9.36		0.993	1.019	1.028	0.986	0.997	0.993	1.061	1.011	1.063	0.923	0.945	0.956	0.876	1.007	0.923	1.028	0.96	1.1		1.013	0.992	1.045	0.941	0.935	1.029		0.98	0.0657173	0.72	-0.02	0.14	0.96	0.140444	0.41	-0.05	0.39	1.02	0.0642464	0.74	0.02	0.13
284	461588	P05496	AT5G1	ATP synthase F(0) complex subunit C1, mitochondrial	136	14.3	9.74		1.069	1.049	1.001	1.003	0.997	0.973	1.102	1.054	1.053	1.05	0.98	0.928	0.942	0.923	0.922	0.948	1.065	0.939		1.039	0.991	1.07	0.986	0.929	0.984		1.06	0.210377	0.29	0.08	0.55	1.01	0.0530188	0.87	0.01	0.06	1.09	0.451528	0.12	0.12	0.92
285	6831494	O75947	ATP5H	ATP synthase subunit d, mitochondrial	161	18.5	5.3		1.012	1.042	0.991	1.04	0.909	1.048	1.076	1.068	1.063	0.949	0.974	0.972	0.938	0.999	0.957	1.049	0.967	1.035		1.015	0.999	1.069	0.965	0.965	1.017		1	0.0504954	0.95	0	0.02	0.98	0.0629738	0.74	-0.03	0.13	1.05	0.473549	0.11	0.07	0.94
286	3023369	P56385	ATP5I	ATP synthase subunit e, mitochondrial	69	7.9	9.35		1.16	1.09	0.994	1.039	1.217	0.966	1.082	1	1.024	1.132	0.981	1.046	0.905	0.849	0.905	1.036	1.043	0.795		1.081	1.074	1.035	1.053	0.886	0.958		1.13	0.233664	0.26	0.17	0.58	1.12	0.170042	0.35	0.16	0.45	1.08	0.138952	0.41	0.11	0.38
287	114688	P18859	ATP5J	ATP synthase-coupling factor 6, mitochondrial	108	12.6	9.52		0.71	0.859	0.883	0.954	0.476	1.098	0.873	1.105	1.062	0.901	0.827	0.798	0.897	1.055	0.845	1.18	0.862	1.631		0.817	0.843	1.013	0.842	0.932	1.224		0.67	0.383144	0.15	-0.58	0.82	0.69	0.235527	0.26	-0.54	0.58	0.83	0.138145	0.42	-0.27	0.38
288	62906882	O75964	ATP5L	ATP synthase subunit g, mitochondrial	103	11.4	9.64		0.75	0.926	0.899	1.021	0.533	1.007	1.033	1.062	1.072	0.95	0.897	0.915	0.895	0.952	0.901	1.081	0.934	1.204		0.858	0.854	1.056	0.921	0.916	1.073		0.8	0.552906	0.09	-0.32	1.06	0.8	0.214159	0.29	-0.33	0.54	0.98	0.054952	0.84	-0.02	0.08
289	114483	P03928	ATP8	ATP synthase protein 8	68	8	9.91		0.864	0.985	0.91	0.97	0.614	0.986	1.014	1.051	0.927	1.076	0.919	0.996	1.003	1.043	0.972	1.114	0.996	1.142		0.92	0.857	0.997	0.997	1.006	1.084		0.85	0.750741	0.05	-0.24	1.35	0.79	0.376741	0.15	-0.34	0.81	0.92	0.294026	0.21	-0.12	0.68
290	1352049	P48047	ATPO	ATP synthase subunit O, mitochondrial	213	23.3	9.96		0.887	0.974	1.025	1.037	0.774	1.013	0.997	1.062	1.014	1.02	0.992	0.973	0.96	1.035	0.955	1.017	0.988	1.067		0.962	0.941	1.024	0.995	0.983	1.024		0.94	0.243885	0.26	-0.09	0.59	0.92	0.148791	0.4	-0.12	0.4	1	0.05	0.98	0	0.01
291	114517	P25705	ATPA	ATP synthase subunit alpha, mitochondrial	553	59.7	9.13		1.032	1.027	1.005	1.028	0.836	1.011	1.054	1.047	1.049	1.017	0.974	0.986	0.984	0.961	0.974	1.047	1.024	1.025		1.022	0.958	1.05	0.992	0.973	1.032		0.99	0.136784	0.41	-0.01	0.39	0.93	0.206056	0.3	-0.11	0.53	1.02	0.572158	0.09	0.02	1.05
292	114549	P06576	ATPB	ATP synthase subunit beta, mitochondrial	529	56.5	5.4		1.055	1.033	0.988	1.012	0.963	1.003	1.057	1.031	1.017	1.04	1.02	0.99	0.982	0.933	1.016	1.044	0.983	0.978		1.025	0.992	1.035	1.017	0.977	1.002		1.02	0.1183	0.46	0.03	0.34	0.99	0.065818	0.74	-0.01	0.13	1.03	0.2514	0.24	0.05	0.62
293	543875	P36542	ATPG	ATP synthase subunit gamma, mitochondrial	298	33	9.22		1.02	1.02	1.038	1.036	0.771	1.011	1.074	1.043	1.017	1.067	1.03	1.02	1.018	0.97	0.985	1.043	1.059	0.964		1.026	0.939	1.044	1.039	0.991	1.022		1	0.0518987	0.89	0.01	0.05	0.92	0.143583	0.41	-0.12	0.39	1.02	0.096052	0.54	0.03	0.27
294	584812	P30049	ATPD	ATP synthase subunit delta, mitochondrial	168	17.5	5.49		1.008	1.058	1.074	1	1.002	1.038	1.078	1.098	1.079	1.077	1.067	1.047	1.027	0.959	1.009	0.994	1.017	0.89		1.047	1.013	1.085	1.063	0.999	0.967		1.08	0.401152	0.14	0.11	0.85	1.05	0.187284	0.32	0.07	0.49	1.12	0.777295	0.04	0.17	1.39
295	3023354	P56381	ATP5E	ATP synthase subunit epsilon, mitochondrial	51	5.8	9.92		0.901	1.09	0.998	1.024	0.683	1.012	1.025	1.075	1.08	1.034	1.029	1.006	0.988	0.966	1.001	1.015	1.061	0.979		0.996	0.907	1.06	1.023	0.985	1.018		0.98	0.0646316	0.73	-0.03	0.14	0.89	0.15271	0.38	-0.17	0.42	1.04	0.269499	0.23	0.06	0.63
296	12585262	Q9UII2	ATIF1	ATPase inhibitor, mitochondrial	106	12.2	9.35		0.833	0.991	0.936	1.011	0.698	1.032	0.887	0.958	0.984	0.963	0.868	0.946	0.932	1.044	0.965	1.114	1.033	1.372		0.92	0.914	0.943	0.926	0.98	1.173		0.78	0.552592	0.09	-0.35	1.06	0.78	0.372476	0.16	-0.36	0.81	0.8	0.521048	0.1	-0.31	1.01
297	74733203	Q9BUB7	TMM70	Transmembrane protein 70, mitochondrial	260	29	8.91		0.97	0.975	1.03	0.97	0.904	1.114	1.042	1.057	1.083	1.014	1.025	0.911	0.909	0.931	1.013	0.911	0.969	0.961		0.992	0.996	1.061	0.983	0.951	0.947		1.05	0.359103	0.16	0.07	0.79	1.05	0.112252	0.49	0.07	0.31	1.12	0.995884	0.01	0.16	2.2
298	3023202	P56378	68MP	6.8 kDa mitochondrial proteolipid	58	6.7	10.08		1.049	1.177	1.047	1.037	0.982	1.031	1.233	1.164	1.088	1.015	0.964	0.923	0.93	0.892	0.903	0.943	1.03	1.071		1.091	1.017	1.162	0.967	0.908	1.015		1.08	0.241852	0.25	0.1	0.6	1	0.0502467	0.96	0	0.02	1.14	0.670681	0.06	0.2	1.22
299	12230759	Q15904	VAS1	V-type proton ATPase subunit S1	470	52	6.14		0.98	1.081	1.01	1.037	1.066	1.04	0.991	1.004	1.03	1.069	0.937	0.966	0.865	0.886	0.837	1.006	0.975	0.978		1.024	1.048	1.008	0.991	0.862	0.987		1.04	0.199981	0.3	0.05	0.52	1.06	0.979992	0.01	0.09	1.94	1.02	0.259163	0.23	0.03	0.65
300	22096378	P38606	VATA	V-type proton ATPase catalytic subunit A	617	68.3	5.52		0.989	0.983	1.01	1.01	0.94	1	0.972	0.967	1.006	0.956	0.975	0.995	1.066	1.032	1.007	0.966	0.972	0.905		0.994	0.984	0.981	0.976	1.035	0.948		1.05	0.46526	0.11	0.07	0.95	1.04	0.200832	0.31	0.05	0.51	1.04	0.244632	0.24	0.05	0.61
301	12643271	P21281	VATB2	V-type proton ATPase subunit B, brain isoform	511	56.5	5.81		0.98	0.972	0.997	0.987	1.087	0.998	0.966	0.978	0.969	1.002	1.039	1.007	1.048	1.045	1.063	1.014	0.985	0.955		0.983	1.024	0.971	1.016	1.052	0.985		1	0.0512377	0.92	0	0.04	1.04	0.178152	0.34	0.06	0.47	0.99	0.120055	0.46	-0.02	0.34
302	401329	P21283	VATC1	V-type proton ATPase subunit C 1	382	43.9	7.46		0.973	0.989	0.984	1.09	0.787	1.107	1.017	1.053	0.946	1.031	1.042	1.034	1.043	1.18	1.076	0.984	1.048	1.133		0.982	0.995	1.005	1.036	1.1	1.055		0.93	0.352111	0.17	-0.1	0.78	0.94	0.0805492	0.62	-0.09	0.21	0.95	0.145311	0.4	-0.07	0.39
303	10720351	Q9Y5K8	VATD	V-type proton ATPase subunit D	247	28.2	9.36		0.991	1.01	0.976	0.962	0.964	0.976	0.998	0.974	0.977	1.208	1.408	1.562	1.124	1.32	0.872	1.392	1.071	1.644		0.992	0.967	0.983	1.393	1.105	1.369		0.72	0.557829	0.09	-0.46	1.07	0.71	0.610593	0.07	-0.5	1.14	0.72	0.577186	0.08	-0.48	1.09
304	549207	P36543	VATE1	V-type proton ATPase subunit E 1	226	26.1	8		0.958	0.917	0.99	0.979	0.868	0.981	1.001	1.008	0.984	0.958	0.954	0.967	1.008	1.091	1.002	0.96	0.981	1.115		0.955	0.943	0.998	0.96	1.034	1.019		0.94	0.209138	0.29	-0.09	0.53	0.93	0.217662	0.28	-0.11	0.55	0.98	0.0696339	0.69	-0.03	0.16
305	6226299	O75348	VATG1	V-type proton ATPase subunit G 1	118	13.7	8.79		1.143	1.073	1.036	1.044	1.227	1.086	1.083	1.057	1.1	1.092	1.126	1.062	1.111	0.985	1.056	0.983	1.094	0.842		1.084	1.119	1.08	1.093	1.051	0.973		1.11	0.2622	0.24	0.16	0.63	1.15	0.323479	0.19	0.2	0.73	1.11	0.276624	0.22	0.15	0.65
306	12643371	Q9UI12	VATH	V-type proton ATPase subunit H	483	55.8	6.48		1.024	0.893	0.983	0.983	0.953	1.032	0.927	0.988	0.954	1.044	1.04	1.058	1.018	1.019	0.972	0.983	1.062	0.982		0.967	0.989	0.956	1.047	1.003	1.009		0.96	0.137096	0.42	-0.06	0.38	0.98	0.0849262	0.6	-0.03	0.22	0.95	0.346443	0.17	-0.08	0.76
307	59803038	Q93050	VPP1	V-type proton ATPase 116 kDa subunit a isoform 1	837	96.4	6.43		1.111	1.083	1.058	0.963	0.915	0.996	1.055	1.016	1.036	1.014	1.001	1.045	1.005	0.96	0.988	0.94	1.032	0.946		1.084	0.958	1.035	1.02	0.984	0.972		1.11	0.859895	0.03	0.16	1.54	0.99	0.0646078	0.72	-0.02	0.14	1.06	0.456428	0.12	0.09	0.93
308	223634720	Q13488	VPP3	V-type proton ATPase 116 kDa subunit a isoform 3	830	92.9	7.12		1.049	1.005	1.031	0.961	1.033	0.967	1.054	1.039	0.981	0.96	0.836	0.902	0.969	0.961	0.895	0.997	0.895	0.878		1.028	0.987	1.025	0.899	0.942	0.923		1.11	0.690718	0.05	0.16	1.26	1.07	0.281838	0.22	0.1	0.66	1.11	0.58724	0.08	0.15	1.1
309	47606646	P61421	VA0D1	V-type proton ATPase subunit d 1	351	40.3	5		1.043	1.007	1.027	0.987	1.054	0.95	1.046	1.025	0.988	1.017	0.98	0.945	0.942	0.998	0.938	0.985	0.962	1.04		1.025	0.997	1.02	0.981	0.959	0.996		1.03	0.192267	0.31	0.04	0.51	1	0.0500729	0.97	0	0.01	1.02	0.125898	0.45	0.03	0.34
310	114374	P05023	AT1A1	Sodium/potassium-transporting ATPase subunit alpha-1	1023	112.8	5.49		1.053	1.047	1.013	1.035	1.009	1.033	1.039	1.026	0.998	1.023	1.009	0.966	1.004	0.968	0.988	1.017	1.031	0.976		1.038	1.026	1.021	1	0.987	1.008		1.03	0.278071	0.22	0.04	0.65	1.02	0.152988	0.39	0.03	0.41	1.01	0.0935229	0.56	0.02	0.25
311	114392	P05026	AT1B1	Sodium/potassium-transporting ATPase subunit beta-1	303	35	8.53		0.966	0.949	0.929	1.077	0.787	1.077	0.998	1.012	1.072	0.937	0.988	0.943	0.996	1.071	1.046	1.109	1.022	1.331		0.948	0.981	1.027	0.956	1.038	1.154		0.82	0.541958	0.09	-0.28	1.05	0.85	0.232854	0.26	-0.23	0.58	0.89	0.245276	0.25	-0.17	0.6
312	1703470	P54709	AT1B3	Sodium/potassium-transporting ATPase subunit beta-3	279	31.5	8.35		0.953	0.978	0.958	1.029	0.784	0.996	0.965	1.035	0.978	0.986	0.893	0.9	0.95	0.995	0.969	1.062	0.962	1.125		0.963	0.936	0.992	0.926	0.972	1.05		0.92	0.395921	0.14	-0.12	0.84	0.89	0.223697	0.28	-0.17	0.56	0.95	0.184987	0.33	-0.08	0.48
313	8134359	P78396	CCNA1	Cyclin-A1	465	52.3	5.1		0.78	0.917	0.82	0.918	0.961	0.827	0.994	1.036	0.817	0	0.969	1.083	1.462	0.853	1.365	1.299	1.545	1.036		0.839	0.902	0.949	0.684	1.227	1.294		0.65	0.778454	0.04	-0.62	1.39	0.7	0.660574	0.06	-0.52	1.21	0.73	0.510651	0.1	-0.45	1
314	215274241	P15336	ATF2	Cyclic AMP-dependent transcription factor ATF-2	505	54.5	7.88		1.229	1.098	1.207	1.108	1.698	1.069	1.078	0.98	1.093	1.032	0.901	0.991	0.932	0.757	0.963	0.89	0.928	0.749		1.178	1.292	1.05	0.975	0.884	0.855		1.38	0.987793	0.01	0.46	2.05	1.51	0.489111	0.11	0.59	0.97	1.23	0.782983	0.04	0.3	1.4
315	728945	Q07812	BAX	Apoptosis regulator BAX	192	21.2	5.22		0.948	0.955	1.051	1.03	0.948	1.009	1.004	1.08	1.077	0.96	1.09	1.099	1.195	1.101	1.074	0.981	0.995	0.843		0.985	0.996	1.054	1.05	1.123	0.94		1.05	0.113403	0.49	0.07	0.31	1.06	0.165415	0.36	0.08	0.44	1.12	0.495216	0.11	0.16	0.97
316	108860796	Q8IXI2	MIRO1	Mitochondrial Rho GTPase 1	618	70.7	6.27		1.075	1.043	1.036	0.896	1.223	0.914	1.031	0.936	1.057	0.993	1.126	1.019	0.889	0.925	1	0.937	0.894	0.9		1.051	1.011	1.008	1.046	0.938	0.91		1.15	0.999999	0	0.21	2.83	1.11	0.146885	0.4	0.15	0.4	1.11	0.63693	0.07	0.15	1.17
317	143811467	Q8TC07	TBC15	TBC1 domain family member 15	691	79.4	5.67		1.052	1.009	1.064	1.02	1.129	1.059	0.996	1.074	1.109	1.038	1.029	1	1.014	0.985	1.021	0.901	0.961	0.903		1.042	1.069	1.06	1.022	1.007	0.921		1.13	0.985842	0.01	0.18	2	1.16	0.943353	0.02	0.21	1.77	1.15	0.899512	0.02	0.2	1.63
318	9297077	Q92574	TSC1	Hamartin	1164	129.7	6.47		0.805	1.004	1.244	1.061	0.611	1.134	0.92	1.018	1.082	0.812	0.955	0.955	0.957	1.051	1.075	0.911	0.846	0.902		1.018	0.935	1.007	0.907	1.028	0.886		1.15	0.164785	0.36	0.2	0.44	1.06	0.0594486	0.78	0.08	0.11	1.14	0.588425	0.08	0.18	1.11
319	232066	P27361	MK03	Mitogen-activated protein kinase 3	379	43.1	6.74		0.987	0.925	0.987	1.022	0.971	0.999	0.999	0.977	0.979	0.993	0.972	1.078	0.973	0.993	1.078	0.921	0.871	0.844		0.966	0.998	0.985	1.014	1.015	0.878		1.1	0.750051	0.05	0.14	1.34	1.14	0.977222	0.01	0.18	1.94	1.12	0.9804	0.01	0.16	1.97
320	74735450	O60671	RAD1	Cell cycle checkpoint protein RAD1	282	31.8	4.83		1.049	0.998	1.038	0.894	1.011	0.883	0.973	0.814	1.086	0.704	0.864	0.965	0.949	0.869	0.757	0.787	0.842	0.775		1.028	0.929	0.957	0.844	0.858	0.801		1.28	1	0	0.36	3.03	1.16	0.726087	0.05	0.21	1.31	1.2	0.43193	0.13	0.26	0.89
321	74735628	Q13501	SQSTM	Sequestosome-1	440	47.7	5.22		1.19	1.095	1.11	1.106	1.431	1.033	1.116	1.094	1.098	1.027	1.071	1.06	0.97	0.915	1.004	0.9	0.994	0.838		1.131	1.19	1.102	1.053	0.963	0.911		1.24	0.953617	0.02	0.31	1.82	1.31	0.511739	0.1	0.39	1	1.21	0.961023	0.01	0.28	1.86
322	129576	P05121	PAI1	Plasminogen activator inhibitor 1	402	45	7.2		1.048	1.116	1.019	0.971	0.963	0.932	1.069	1.033	0.986	1.08	1.008	1.008	0.959	0.881	0.924	0.961	0.957	0.84		1.061	0.955	1.029	1.032	0.921	0.919		1.15	0.755861	0.04	0.21	1.36	1.04	0.131944	0.43	0.06	0.37	1.12	0.592801	0.08	0.16	1.12
323	34921508	Q13541	4EBP1	Eukaryotic translation initiation factor 4E-binding protein 1	118	12.6	5.48		1.076	0.945	1.077	0.978	0.834	1.031	1.16	1.242	1.449	0.996	1.069	1.026	1.046	1.105	0.951	0.905	1.008	0.774		1.033	0.948	1.284	1.03	1.034	0.896		1.15	0.357801	0.16	0.21	0.78	1.06	0.0861622	0.59	0.08	0.23	1.43	0.893318	0.02	0.52	1.62
324	317373289	O76024	WFS1	Wolframin	890	100.2	8.05		1.011	1.012	0.913	1.024	1.096	1.017	1.144	1.02	1.031	1.025	1.043	1.172	1.033	0.877	1.074	1	1.197	0.766		0.979	1.046	1.065	1.08	0.995	0.988		0.99	0.0505201	0.95	-0.01	0.02	1.06	0.0723358	0.67	0.08	0.17	1.08	0.087358	0.59	0.11	0.23
325	74762702	Q99942	RNF5	E3 ubiquitin-protein ligase RNF5	180	19.9	6.65		1.098	0.981	0.95	0.917	1.365	1.037	1.138	1.038	1.064	1.053	0.969	0.976	0.884	0.864	0.933	0.864	1.022	0.898		1.01	1.106	1.08	1	0.894	0.928		1.09	0.21883	0.28	0.12	0.55	1.19	0.220485	0.28	0.25	0.56	1.16	0.694872	0.05	0.22	1.26
326	57012667	Q6FI81	CPIN1	Anamorsin	312	33.6	5.62		0.977	0.935	0.969	1.028	1.094	0.992	0.965	1.019	1.035	0.979	1.049	1.105	1.089	1.013	1.143	0.956	0.993	0.881		0.96	1.038	1.006	1.044	1.082	0.943		1.02	0.0747924	0.65	0.03	0.18	1.1	0.510967	0.1	0.14	1	1.07	0.327946	0.18	0.09	0.74
327	74733510	Q9GZZ9	UBA5	Ubiquitin-like modifier-activating enzyme 5	404	44.8	4.84		1.064	0.958	1.061	0.982	1.744	0.986	1.047	0.911	0.978	0.934	0.988	1.019	0.957	1.063	1.01	0.943	0.926	0.855		1.028	1.237	0.978	0.981	1.01	0.908		1.13	0.706401	0.05	0.18	1.27	1.36	0.231452	0.27	0.45	0.57	1.08	0.283863	0.21	0.11	0.67
328	50400302	Q13564	ULA1	NEDD8-activating enzyme E1 regulatory subunit	534	60.2	5.4		0.936	1.012	1.043	0.97	0.81	1.06	0.979	0.907	0.983	1.153	1.039	1.094	1.103	0.96	1.063	0.897	1.012	0.898		0.997	0.947	0.957	1.095	1.042	0.936		1.07	0.214235	0.29	0.09	0.54	1.01	0.0518966	0.9	0.02	0.04	1.02	0.0728942	0.67	0.03	0.17
329	124077986	O75592	MYCB2	E3 ubiquitin-protein ligase MYCBP2	4640	509.8	7.03		0.885	0.83	1.012	0.914	1.245	0.859	0.864	0.936	0.832	1.188	1.346	1.224	1.447	0.974	1.075	0.925	1.122	0.968		0.909	1.006	0.878	1.252	1.165	1.005		0.9	0.204887	0.3	-0.14	0.52	1	0.0500059	1	0	0	0.87	0.423326	0.13	-0.2	0.89
330	17380344	Q12899	TRI26	Tripartite motif-containing protein 26	539	62.1	5.03		1.001	0.979	1.029	1.09	1.069	1.125	0.768	0.773	0.788	0.952	0.968	0.993	1.009	0.887	1.07	1.028	1.086	0.887		1.003	1.095	0.776	0.971	0.989	1		1	0.0502591	0.97	0	0.01	1.09	0.308888	0.2	0.13	0.7	0.78	0.92429	0.02	-0.37	1.71
331	296453004	Q6PJ69	TRI65	Tripartite motif-containing protein 65	517	57.3	6.7		1.344	1.219	1.095	0.837	1.311	0.983	1.309	1.119	0.958	0.938	0.915	0.957	1.01	1.03	1.071	0.874	1.023	0.925		1.22	1.044	1.129	0.937	1.037	0.94		1.3	0.855625	0.03	0.37	1.53	1.11	0.10422	0.52	0.15	0.28	1.2	0.362038	0.16	0.26	0.79
332	134048494	Q6ZNB6	NFXL1	NF-X1-type zinc finger protein NFXL1	911	101.3	8.41		1.018	0.979	0.951	1.038	1.059	0.98	0.947	0.981	0.953	1.014	1.022	0.977	1.005	1.012	0.994	0.988	1.019	0.988		0.983	1.026	0.96	1.004	1.004	0.999		0.98	0.107156	0.51	-0.02	0.29	1.03	0.169353	0.35	0.04	0.46	0.96	0.683927	0.06	-0.06	1.24
333	74727495	Q86UK7	ZN598	Zinc finger protein 598	904	98.6	8.4		0.921	0.972	1.001	1.052	0.81	1.061	1.042	1.011	1.042	0.993	0.93	0.881	1.051	0.988	0.965	0.969	0.934	0.95		0.964	0.974	1.032	0.935	1.001	0.951		1.01	0.0779693	0.63	0.02	0.2	1.02	0.0582371	0.79	0.03	0.1	1.08	0.998308	0.01	0.12	2.28
334	3122657	Q16401	PSMD5	26S proteasome non-ATPase regulatory subunit 5	504	56.2	5.48		0.982	0.986	1.02	1.021	1.014	0.968	0.958	1.001	0.99	1.061	1.102	1.046	1.124	1.103	1.018	0.984	0.968	1.05		0.996	1.001	0.983	1.07	1.082	1.001		1	0.0534401	0.87	-0.01	0.06	1	0.05	0.98	0	0.01	0.98	0.0938838	0.57	-0.03	0.25
335	317373521	O00233	PSMD9	26S proteasome non-ATPase regulatory subunit 9	223	24.7	6.95		1.05	0.96	1.008	0.973	1.116	1.002	0.998	0.996	1.027	0.957	0.9	0.976	0.984	1.004	1.006	0.902	0.909	0.817		1.006	1.03	1.007	0.944	0.998	0.876		1.15	0.850461	0.03	0.2	1.52	1.18	0.762126	0.04	0.23	1.36	1.15	0.963093	0.01	0.2	1.86
336	134035039	Q86TM6	SYVN1	E3 ubiquitin-protein ligase synoviolin	617	67.6	6.95		1.315	1.112	1.106	1.134	0.948	1.169	0.995	1.088	1.127	0.986	0.868	1.069	0.82	0.928	0.758	0.872	0.838	0.927		1.178	1.084	1.07	0.975	0.835	0.879		1.34	0.954043	0.02	0.42	1.82	1.23	0.72744	0.05	0.3	1.31	1.22	0.953619	0.02	0.28	1.81
337	311033358	P20248	CCNA2	Cyclin-A2	432	48.5	6.54		1.228	0.971	1.02	1.003	1.077	0.923	1.173	1.029	0.986	0.891	0.965	0.977	0.941	0.952	0.909	0.844	0.935	1.064		1.073	1.001	1.062	0.944	0.934	0.948		1.13	0.215505	0.28	0.18	0.55	1.06	0.100122	0.53	0.08	0.27	1.12	0.244305	0.25	0.16	0.6
338	116176	P14635	CCNB1	G2/mitotic-specific cyclin-B1	433	48.3	7.47		0.925	0.965	1.027	0.999	0.83	1.007	1.01	1.024	0.992	1.03	1.014	1	1.004	1.024	1.021	0.963	1.003	0.94		0.972	0.946	1.009	1.015	1.016	0.969		1	0.0507866	0.92	0.01	0.04	0.98	0.0654335	0.72	-0.03	0.14	1.04	0.441881	0.12	0.06	0.91
339	218511966	O75909	CCNK	Cyclin-K	580	64.2	8.41		1.109	1.003	0.979	1.083	1.173	1.09	0.909	1.023	1.033	0.985	1.138	1.055	0.969	1.149	0.945	1.039	1.075	1.054		1.031	1.116	0.988	1.059	1.021	1.056		0.98	0.0895093	0.57	-0.04	0.24	1.06	0.445791	0.13	0.08	0.9	0.94	0.342833	0.17	-0.1	0.76
340	71658801	Q8ND76	CCNY	Cyclin-Y	341	39.3	7.2		1.042	0.999	1.064	1.053	0.923	0.94	1.078	1.18	0.988	1.048	1.004	0.958	0.945	1.002	0.971	0.915	1.023	0.867		1.035	0.972	1.082	1.003	0.973	0.935		1.11	0.46373	0.12	0.15	0.93	1.04	0.0888824	0.59	0.06	0.23	1.16	0.476019	0.11	0.21	0.95
341	334302921	P06493	CDK1	Cyclin-dependent kinase 1	297	34.1	8.4		0.96	0.98	1.012	1.043	0.822	1.085	0.967	1.009	1.017	0.991	0.982	1.018	1.047	1.081	1.035	1.003	0.922	1.101		0.984	0.983	0.998	0.997	1.054	1.009		0.98	0.0730633	0.67	-0.04	0.18	0.97	0.0577368	0.81	-0.04	0.09	0.99	0.0544234	0.85	-0.02	0.07
342	116051	P24941	CDK2	Cyclin-dependent kinase 2	298	33.9	8.68		0.903	0.956	1.012	1.054	0.777	1.124	0.92	1.091	1.02	0.881	0.932	0.953	0.964	1.114	1.087	1.023	0.88	1.241		0.957	0.985	1.01	0.922	1.055	1.048		0.91	0.124772	0.45	-0.13	0.34	0.94	0.0691256	0.7	-0.09	0.16	0.96	0.0614577	0.76	-0.05	0.12
343	1168867	P11802	CDK4	Cyclin-dependent kinase 4	303	33.7	7.01		0.893	0.896	1.017	1.027	0.834	1.032	0.859	0.901	0.894	1.154	1.081	0.98	1.04	1.096	1.092	1.047	0.984	1.028		0.935	0.964	0.885	1.072	1.076	1.02		0.92	0.424879	0.13	-0.12	0.88	0.95	0.123951	0.46	-0.08	0.34	0.87	0.999311	0	-0.2	2.39
344	4033704	Q00535	CDK5	Cyclin-dependent-like kinase 5	292	33.3	7.66		0.94	1.042	0.98	1.032	0.97	0.942	0.982	0.991	1.016	1.032	1.146	1.095	1.114	1.139	1.121	0.984	1.115	1.019		0.987	0.981	0.996	1.091	1.125	1.039		0.95	0.171954	0.35	-0.07	0.46	0.94	0.213495	0.29	-0.08	0.54	0.96	0.172983	0.35	-0.06	0.46
345	266423	Q00534	CDK6	Cyclin-dependent kinase 6	326	36.9	6.46		0.968	0.885	0.92	1.03	1.141	1.046	0.945	0.92	0.911	1.079	1.221	1.087	1.246	1.046	1.103	0.999	1.09	0.818		0.924	1.072	0.926	1.129	1.132	0.969		0.95	0.0812406	0.62	-0.07	0.21	1.11	0.202235	0.3	0.15	0.52	0.96	0.0806086	0.62	-0.07	0.21
346	317373559	Q9UQ88	CD11A	Cyclin-dependent kinase 11A	783	91.3	5.36		0.964	1.044	0.992	1.042	0.935	0.972	1.081	1.067	1.044	0.981	0.997	1.049	1.077	1.083	1.096	1.051	1.003	0.955		1	0.983	1.064	1.009	1.085	1.003		1	0.050728	0.94	0	0.03	0.98	0.0744999	0.66	-0.03	0.18	1.06	0.480816	0.11	0.09	0.96
347	308153421	Q9NYV4	CDK12	Cyclin-dependent kinase 12	1490	164.1	9.44		1.172	0.983	0.992	0.97	1.25	0.967	0.936	0.974	1.03	1.083	1.061	0.967	0.99	0.928	0.965	0.966	0.989	0.941		1.049	1.063	0.98	1.037	0.961	0.966		1.09	0.238197	0.26	0.12	0.59	1.1	0.163802	0.36	0.14	0.44	1.02	0.0724279	0.66	0.02	0.18
348	17375734	O14976	GAK	Cyclin-G-associated kinase	1311	143.1	5.73		1.064	1.023	1.036	1.061	1.007	1.028	0.959	1.102	0.965	0.981	0.988	1.053	1.016	1.095	0.996	0.967	0.979	1.06		1.041	1.032	1.009	1.007	1.036	1.002		1.04	0.215726	0.29	0.05	0.54	1.03	0.138855	0.41	0.04	0.39	1.01	0.0517217	0.91	0.01	0.04
349	46577579	P61024	CKS1	Cyclin-dependent kinases regulatory subunit 1	79	9.7	8.94		0.857	0.802	0.865	0.882	0.671	0.835	0.871	0.783	0.792	1.073	1.026	1.105	1.051	1.044	1.032	1.002	1.094	0.896		0.842	0.796	0.816	1.068	1.042	0.997		0.84	0.655631	0.06	-0.25	1.21	0.8	0.583007	0.08	-0.33	1.11	0.82	0.740705	0.05	-0.29	1.34
350	317373439	Q9NYZ3	GTSE1	G2 and S phase-expressed protein 1	720	76.6	9.39		0.99	1.198	1.19	1.096	1.153	1.132	1.207	0.96	0.98	0.974	1.083	1.108	1.1	0.935	1.09	1.006	1.036	0.959		1.126	1.127	1.049	1.055	1.042	1		1.13	0.378346	0.15	0.17	0.81	1.13	0.981194	0.01	0.17	1.99	1.05	0.0881571	0.59	0.07	0.23
351	129694	P12004	PCNA	Proliferating cell nuclear antigen	261	28.8	4.69		1.036	0.99	1.006	1.007	1.127	1.01	0.942	0.941	0.943	0.98	1.032	1.035	1.047	1.025	1.05	0.98	1.011	0.957		1.01	1.048	0.942	1.016	1.041	0.983		1.03	0.235901	0.26	0.04	0.59	1.07	0.302514	0.2	0.09	0.7	0.96	0.674145	0.06	-0.06	1.22
352	132164	P06400	RB	Retinoblastoma-associated protein	928	106.1	7.94		0.842	0.947	1.086	1.067	0.63	1.125	0.96	1.173	0.969	0.964	1.07	1.075	1.056	0.802	0.947	0.842	1.031	0.752		0.959	0.941	1.034	1.037	0.935	0.875		1.1	0.114994	0.48	0.13	0.32	1.08	0.0649604	0.73	0.1	0.14	1.18	0.2859	0.21	0.24	0.67
353	160112977	P33981	TTK	Dual specificity protein kinase TTK	857	97	8.16		1.088	0.945	1.064	0.958	0.98	0.975	0.908	0.889	0.903	1.029	0.967	0.993	1.032	1.135	0.967	1.013	0.948	1.354		1.032	0.971	0.9	0.996	1.045	1.105		0.93	0.0821828	0.62	-0.1	0.21	0.88	0.172979	0.35	-0.19	0.46	0.81	0.333838	0.18	-0.3	0.75
354	37537845	Q9H1A4	APC1	Anaphase-promoting complex subunit 1	1944	216.4	6.3		0.943	0.977	0.985	1.035	0.702	1.069	1.002	1.025	0.984	0.931	0.943	1.05	0.902	1	0.999	0.961	0.899	0.97		0.968	0.935	1.004	0.975	0.967	0.943		1.03	0.152369	0.39	0.04	0.41	0.99	0.0504801	0.95	-0.01	0.02	1.06	0.607128	0.08	0.09	1.12
355	205371737	Q9UJX5	APC4	Anaphase-promoting complex subunit 4	808	92.1	5.53		0.87	0.906	0.929	1.058	1.042	0.882	1.028	0.876	0.813	1.125	1.083	1.135	1.049	1.029	1.024	0.962	1.068	0.965		0.902	0.994	0.906	1.115	1.034	0.998		0.9	0.626549	0.07	-0.15	1.17	1	0.05039	0.95	-0.01	0.02	0.91	0.224281	0.27	-0.14	0.57
356	294862527	Q9UJX3	APC7	Anaphase-promoting complex subunit 7	599	66.8	5.64		0.868	0.901	0.957	0.879	0.796	0.913	0.828	0.869	0.95	0.956	0.882	0.901	0.885	1.036	0.919	0.97	0.904	1.12		0.909	0.863	0.883	0.913	0.947	0.998		0.91	0.231111	0.27	-0.14	0.58	0.86	0.41188	0.14	-0.21	0.86	0.88	0.315257	0.19	-0.18	0.72
357	37537763	Q13042	CDC16	Cell division cycle protein 16 homolog	620	71.6	5.85		0.984	0.947	1.097	1.022	0.872	1.016	1.081	0.919	1.054	0.957	0.955	0.936	1.002	0.993	1.019	1	1.02	0.947		1.01	0.97	1.018	0.949	1.004	0.989		1.02	0.0688299	0.7	0.03	0.15	0.98	0.0634193	0.74	-0.03	0.13	1.03	0.0802811	0.63	0.04	0.2
358	37537762	Q12834	CDC20	Cell division cycle protein 20 homolog	499	54.7	9.23		1.045	0.93	1.021	1.021	1.015	0.997	0.892	0.947	0.915	1.038	1.084	1.075	1.07	0.956	1.06	0.996	1.075	0.887		0.999	1.011	0.918	1.066	1.029	0.986		1.01	0.0542959	0.86	0.02	0.07	1.03	0.0721813	0.67	0.04	0.17	0.93	0.206176	0.3	-0.1	0.53
359	254763423	Q9UJX2	CDC23	Cell division cycle protein 23 homolog	597	68.8	7.02		0.974	0.999	1.035	1.05	0.879	1.058	1.007	1.05	1.026	1.085	1.055	1.027	1.002	1.022	1.026	0.976	1.062	1.021		1.002	0.996	1.028	1.056	1.017	1.02		0.98	0.087504	0.6	-0.02	0.22	0.98	0.0653206	0.73	-0.03	0.14	1.01	0.0588628	0.78	0.01	0.11
360	12644198	P30260	CDC27	Cell division cycle protein 27 homolog	824	91.8	7.02		1.098	1.057	1.06	1.01	1.165	0.989	1.005	0.953	0.964	0.978	0.952	0.957	0.965	0.945	0.969	0.997	1.007	0.903		1.071	1.055	0.974	0.962	0.96	0.969		1.11	0.745652	0.05	0.14	1.34	1.09	0.242491	0.26	0.12	0.59	1	0.0519776	0.9	0.01	0.04
361	52783153	Q9Y6D9	MD1L1	Mitotic spindle assembly checkpoint protein MAD1	718	83	5.92		0.957	1.016	1.05	1.012	0.951	0.962	0.935	0.945	0.975	1.047	1.007	1.004	1.027	0.915	1.004	0.996	1.019	0.907		1.008	0.975	0.951	1.019	0.982	0.974		1.03	0.115718	0.49	0.05	0.31	1	0.0500702	0.98	0	0.01	0.98	0.0935136	0.57	-0.03	0.25
362	12230256	Q13257	MD2L1	Mitotic spindle assembly checkpoint protein MAD2A	205	23.5	5.08		0.83	0.889	0.969	0.998	0.798	0.997	0.916	0.983	1.02	1.02	0.922	0.968	0.992	1.082	1.039	0.999	0.941	0.935		0.896	0.931	0.973	0.97	1.038	0.958		0.94	0.254773	0.24	-0.1	0.62	0.97	0.0661325	0.72	-0.04	0.15	1.02	0.0679521	0.7	0.02	0.15
363	3041660	P42771	CD2A1	Cyclin-dependent kinase inhibitor 2A, isoforms 1/2/3	156	16.5	5.81		0.821	0.871	0.931	0.967	0.496	1.013	0.89	0.959	0.924	0.83	0.912	0.966	0.964	1.026	0.984	0.962	0.937	1.058		0.874	0.825	0.924	0.902	0.991	0.986		0.89	0.568363	0.08	-0.17	1.08	0.84	0.148343	0.4	-0.26	0.4	0.94	0.286717	0.22	-0.09	0.67
364	2498443	Q13547	HDAC1	Histone deacetylase 1	482	55.1	5.48		0.894	1.048	1.024	1.103	0.575	1.076	0.941	1.087	1.004	1.011	1.04	1.005	1.012	0.981	1.063	1.067	0.954	1.009		0.989	0.918	1.011	1.018	1.019	1.01		0.98	0.0640761	0.73	-0.03	0.14	0.91	0.0797892	0.63	-0.14	0.2	1	0.0500374	0.99	0	0
365	68068066	Q92769	HDAC2	Histone deacetylase 2	488	55.3	5.91		0.91	1.067	1.008	1.047	0.684	1.033	0.999	1.019	1.028	1.082	1.121	0.982	1.042	0.974	1.019	1.017	1.062	0.976		0.995	0.922	1.015	1.062	1.012	1.018		0.98	0.0709067	0.68	-0.03	0.17	0.9	0.11783	0.47	-0.14	0.33	1	0.0513898	0.92	0	0.04
366	2494229	Q16254	E2F4	Transcription factor E2F4	413	43.9	4.75		0.705	0.828	0.928	0.946	0.382	1.14	0.692	0.977	0.927	1.079	1.018	1.142	1.015	1.082	0.871	1.025	1.01	1.067		0.82	0.823	0.865	1.08	0.989	1.034		0.79	0.83117	0.03	-0.33	1.48	0.8	0.143068	0.41	-0.33	0.39	0.84	0.423212	0.13	-0.26	0.88
367	51338669	P84022	SMAD3	Mothers against decapentaplegic homolog 3	425	48	7.15		0.967	0.996	1	0.954	0.953	1.023	0.805	0.898	0.918	1.11	0.967	1.06	0.935	1.032	0.931	0.924	1	1.12		0.988	0.977	0.874	1.045	0.966	1.015		0.97	0.0732567	0.66	-0.04	0.18	0.96	0.0910371	0.57	-0.06	0.25	0.86	0.501499	0.1	-0.22	0.99
368	13959561	Q13485	SMAD4	Mothers against decapentaplegic homolog 4	552	60.4	6.99		1.096	1.069	1.016	1.056	0.9	0.98	0.95	0.936	0.909	1.082	0.916	1.092	1.176	1.048	1.118	1.098	1.083	1.009		1.06	0.979	0.932	1.03	1.114	1.063		1	0.0507327	0.93	0	0.03	0.92	0.322428	0.18	-0.12	0.73	0.88	0.972912	0.01	-0.19	1.92
369	55976573	Q99640	PMYT1	Membrane-associated tyrosine- and threonine-specific cdc2-inhibitory kinase	499	54.5	6.93		0.951	0.85	0.897	0.921	1.204	0.784	0.925	0.963	0.654	1.178	1.213	1.005	1.066	0.962	1.04	1.012	1.052	0.962		0.899	0.97	0.847	1.132	1.023	1.008		0.89	0.724956	0.05	-0.17	1.31	0.96	0.0596634	0.78	-0.06	0.11	0.84	0.324702	0.18	-0.25	0.73
370	29336594	O95997	PTTG1	Securin	202	22	6.6		1.02	0.996	0.996	0.931	1.198	0.984	0.983	0.959	0.877	0.823	0.862	0.959	0.832	0.906	0.927	0.831	0.829	0.89		1.004	1.038	0.94	0.881	0.888	0.85		1.18	0.999983	0	0.24	2.7	1.22	0.546512	0.09	0.29	1.05	1.11	0.595798	0.08	0.15	1.12
371	52783797	P63208	SKP1	S-phase kinase-associated protein 1	163	18.6	4.54		1.025	1.087	1.051	1.058	0.918	1.056	1.021	1.022	1.058	0.995	1	0.984	1.008	1.019	1.013	0.979	0.998	0.898		1.054	1.011	1.034	0.993	1.013	0.958		1.1	0.699465	0.05	0.14	1.26	1.05	0.148911	0.4	0.08	0.4	1.08	0.56969	0.08	0.11	1.07
372	19863257	Q13616	CUL1	Cullin-1	776	89.6	8		1.032	0.957	0.927	0.944	0.963	0.959	0.995	0.983	0.985	1.021	1.019	1.005	0.997	0.973	1.001	0.941	1.001	0.913		0.972	0.955	0.988	1.015	0.991	0.952		1.02	0.0760493	0.64	0.03	0.19	1	0.0513564	0.9	0.01	0.05	1.04	0.25472	0.24	0.05	0.62
373	51338609	P62877	RBX1	E3 ubiquitin-protein ligase RBX1	108	12.3	6.96		0.988	1.063	1.031	1.011	0.612	1.076	1.09	1.008	1.064	0.938	1.054	0.964	1.059	1.135	1.066	1.078	1.046	0.903		1.027	0.9	1.054	0.986	1.087	1.009		1.02	0.0602878	0.77	0.03	0.11	0.89	0.10363	0.52	-0.17	0.28	1.04	0.112978	0.49	0.06	0.31
374	1709658	P53350	PLK1	Serine/threonine-protein kinase PLK1	603	68.2	8.91		1.016	1.07	1.007	1.025	0.939	1.021	0.894	0.978	0.925	1.035	0.96	0.951	0.995	1.011	1.032	0.986	0.987	0.913		1.031	0.995	0.932	0.982	1.013	0.962		1.07	0.531993	0.09	0.1	1.02	1.03	0.135316	0.43	0.05	0.37	0.97	0.131258	0.44	-0.05	0.36
375	8134347	O43683	BUB1	Mitotic checkpoint serine/threonine-protein kinase BUB1	1085	122.3	6.47		1.227	1.107	1.169	1.387	0.909	1.364	0.941	1.042	1.101	0.902	0.917	0.946	0.927	0.996	0.965	0.961	0.917	0.855		1.168	1.22	1.028	0.922	0.962	0.911		1.28	0.99806	0.01	0.36	2.28	1.34	0.444137	0.12	0.42	0.91	1.13	0.495286	0.1	0.17	0.99
376	7387554	O43684	BUB3	Mitotic checkpoint protein BUB3	328	37.1	6.84		0.976	0.985	0.996	1.006	0.985	1.011	0.982	0.972	0.996	0.989	1.006	1.008	1.026	0.984	1.014	0.971	1.013	0.926		0.986	1.001	0.983	1.001	1.008	0.97		1.02	0.0915234	0.57	0.02	0.24	1.03	0.20073	0.31	0.05	0.51	1.01	0.076712	0.64	0.02	0.2
377	143811368	O60566	BUB1B	Mitotic checkpoint serine/threonine-protein kinase BUB1 beta	1050	119.5	5.27		1.102	0.955	0.941	0.95	1.036	0.961	0.942	0.952	0.901	1.181	1.048	1.065	1.138	1.051	1.105	1.039	1.163	0.951		0.999	0.982	0.932	1.098	1.098	1.051		0.95	0.0953393	0.55	-0.07	0.26	0.93	0.164852	0.37	-0.1	0.44	0.89	0.418834	0.13	-0.17	0.87
378	317373343	O14757	CHK1	Serine/threonine-protein kinase Chk1	476	54.4	8.25		1.062	1.066	1.072	1.003	1.006	0.915	0.961	0.889	0.959	0.951	1.04	0.795	0.973	0.984	0.891	0.991	0.854	1.079		1.067	0.975	0.936	0.929	0.949	0.975		1.09	0.263883	0.23	0.13	0.64	1	0.05	1	0	0	0.96	0.0837671	0.61	-0.06	0.21
379	29336622	Q14683	SMC1A	Structural maintenance of chromosomes protein 1A	1233	143.1	7.64		1.003	1.034	0.985	1.025	0.766	1.007	1.034	1.005	1.017	0.99	0.971	0.987	0.975	1.004	0.988	1.066	1.004	1.047		1.007	0.933	1.019	0.983	0.989	1.039		0.97	0.255515	0.25	-0.04	0.61	0.9	0.217407	0.28	-0.16	0.55	0.98	0.156876	0.37	-0.03	0.43
380	57015410	Q8NDV3	SMC1B	Structural maintenance of chromosomes protein 1B	1235	143.8	7.66		0.841	0.849	0.873	0.953	1.166	0.952	0.847	0.933	0.896	0.889	1.015	0.912	1.108	1.041	1.013	0.912	0.945	1.112		0.855	1.024	0.892	0.939	1.054	0.99		0.86	0.517547	0.1	-0.21	1.02	1.03	0.0639042	0.74	0.05	0.13	0.9	0.283477	0.22	-0.15	0.66
381	29337005	Q9UQE7	SMC3	Structural maintenance of chromosomes protein 3	1217	141.5	7.18		1.039	1.034	0.992	1.044	0.945	1.015	1.026	1.026	1.019	0.994	0.981	0.965	0.948	0.974	0.987	1.008	1.037	0.99		1.022	1.001	1.024	0.98	0.969	1.012		1.01	0.0762183	0.65	0.01	0.19	0.99	0.0623153	0.76	-0.02	0.12	1.01	0.131001	0.44	0.02	0.36
382	25091097	O60216	RAD21	Double-strand-break repair protein rad21 homolog	631	71.6	4.65		1.018	1.039	0.997	1.004	0.943	0.954	1.061	1.003	1.032	1.082	1.047	1.04	0.968	0.948	0.981	1.034	0.987	0.979		1.018	0.967	1.032	1.056	0.966	1		1.02	0.129641	0.43	0.03	0.36	0.97	0.233211	0.27	-0.05	0.57	1.03	0.243716	0.25	0.05	0.6
383	8488999	Q13416	ORC2	Origin recognition complex subunit 2	577	65.9	6.51		0.975	1.057	1.01	0.968	0.937	0.98	1.008	1.081	1.014	1.258	1.219	1.246	1.186	1.112	1.348	1.058	1.162	0.893		1.014	0.962	1.034	1.241	1.215	1.038		0.98	0.0591895	0.79	-0.03	0.1	0.93	0.149711	0.4	-0.11	0.4	1	0.0502552	0.97	0	0.01
384	8928268	Q9UBD5	ORC3	Origin recognition complex subunit 3	711	82.2	7.61		0.721	0.916	0.849	0.998	0.478	1.115	0.977	0.99	0.944	0.839	0.802	0.844	0.886	1.023	0.922	1.053	0.839	1.153		0.829	0.864	0.97	0.828	0.944	1.015		0.82	0.361252	0.16	-0.29	0.79	0.85	0.10251	0.52	-0.23	0.28	0.96	0.0747993	0.65	-0.07	0.18
385	8928274	Q9Y5N6	ORC6	Origin recognition complex subunit 6	252	28.1	8.66		0.941	1.081	1.039	1.157	1.124	1.308	1.125	1.207	1.146	0.947	0.958	0.996	0.99	1.07	1.045	1.011	0.952	1.154		1.02	1.197	1.159	0.967	1.035	1.039		0.98	0.0572509	0.81	-0.03	0.09	1.15	0.432755	0.13	0.2	0.89	1.12	0.41032	0.14	0.16	0.86
386	41019490	P49736	MCM2	DNA replication licensing factor MCM2	904	101.8	5.52		1.011	1.022	0.995	0.999	1.003	1.013	1	1	0.95	0.969	1.019	0.986	0.972	1.037	1.014	1.006	1.042	1.033		1.009	1.005	0.983	0.992	1.008	1.027		0.98	0.247331	0.26	-0.03	0.59	0.98	0.426689	0.13	-0.03	0.88	0.96	0.538524	0.09	-0.06	1.03
387	19857543	P25205	MCM3	DNA replication licensing factor MCM3	808	90.9	5.77		0.959	1.013	0.992	1.028	0.861	1.006	0.978	0.976	0.984	0.968	0.988	0.992	1.006	0.989	1.004	0.972	0.993	0.992		0.988	0.965	0.979	0.983	1	0.986		1	0.0514513	0.89	0	0.05	0.98	0.0669227	0.72	-0.03	0.14	0.99	0.151374	0.44	-0.01	0.36
388	68571766	P33991	MCM4	DNA replication licensing factor MCM4	863	96.5	6.74		0.975	0.981	0.988	1.004	0.9	1.024	0.937	0.969	0.986	0.977	0.994	1.022	1.035	1.05	1.016	1.029	1.014	0.99		0.981	0.976	0.964	0.998	1.034	1.011		0.97	0.638528	0.07	-0.04	1.17	0.97	0.132762	0.43	-0.05	0.37	0.95	0.657598	0.06	-0.07	1.2
389	19858646	P33992	MCM5	DNA replication licensing factor MCM5	734	82.2	8.37		1.026	1.029	0.994	1.019	1.153	0.99	1.003	0.942	0.984	1.016	1.006	0.99	1.016	0.962	1	1.018	0.982	0.946		1.016	1.054	0.976	1.004	0.993	0.982		1.03	0.274725	0.22	0.05	0.66	1.07	0.24093	0.26	0.1	0.59	0.99	0.0550765	0.84	-0.01	0.08
390	2497824	Q14566	MCM6	DNA replication licensing factor MCM6	821	92.8	5.41		0.98	0.994	0.971	1.019	1.042	1.002	0.954	0.975	0.967	0.995	0.993	1.016	0.99	0.993	1.007	1.008	0.992	0.939		0.981	1.021	0.965	1.001	0.997	0.98		1	0.0502222	0.94	0	0.03	1.04	0.364619	0.15	0.06	0.81	0.99	0.101456	0.54	-0.02	0.27
391	20981696	P33993	MCM7	DNA replication licensing factor MCM7	719	81.3	6.46		0.986	0.968	0.979	1.02	0.953	1.029	0.948	1.008	0.952	0.997	1.003	1.006	1.007	1.008	1.039	1.021	0.999	1.03		0.978	1.001	0.969	1.002	1.018	1.017		0.96	0.912947	0.02	-0.06	1.66	0.98	0.091834	0.57	-0.02	0.25	0.95	0.54686	0.09	-0.07	1.04
392	269849686	P49327	FAS	Fatty acid synthase	2511	273.3	6.44		0.955	0.96	0.991	0.977	0.927	0.993	0.932	0.982	0.989	0.971	1.018	1.014	1.046	1.073	1.059	1.002	1.004	1.018		0.969	0.965	0.968	1.001	1.059	1.008		0.96	0.82112	0.03	-0.06	1.47	0.96	0.497061	0.1	-0.06	0.98	0.96	0.51436	0.09	-0.06	1.02
393	209572633	Q14573	ITPR3	Inositol 1,4,5-trisphosphate receptor type 3	2671	303.9	6.48		0.92	0.927	0.943	0.93	0.858	0.973	0.953	1.015	0.932	0.942	0.931	0.911	0.938	0.943	0.928	0.997	0.933	1.086		0.93	0.92	0.967	0.928	0.937	1.005		0.93	0.348595	0.17	-0.11	0.78	0.92	0.302077	0.2	-0.13	0.7	0.96	0.110334	0.49	-0.06	0.31
394	6094511	Q15628	TRADD	Tumor necrosis factor receptor type 1-associated DEATH domain protein	312	34.2	6.27		0.999	1.065	0.967	1.002	1.049	1.004	1.025	1.106	1.111	0.918	1.097	1.213	1.08	1.057	1.002	0.976	0.955	0.948		1.01	1.018	1.081	1.076	1.047	0.96		1.05	0.346146	0.17	0.07	0.77	1.06	0.852973	0.03	0.09	1.52	1.13	0.960354	0.01	0.17	1.84
395	18203316	Q9NR28	DBLOH	Diablo homolog, mitochondrial	239	27.1	5.9		1.035	1.016	0.965	0.949	1.125	0.967	1.116	0.994	1.084	1.068	1.02	1.013	0.95	0.954	0.956	1.1	1.013	0.94		1.005	1.014	1.064	1.034	0.953	1.018		0.99	0.0570068	0.82	-0.02	0.09	1	0.0503238	0.96	-0.01	0.02	1.05	0.115975	0.47	0.06	0.32
396	17376879	O43464	HTRA2	Serine protease HTRA2, mitochondrial	458	48.8	10.07		1.011	1.093	1.037	1.013	1.137	1.005	1.102	1.008	1.02	1.018	0.983	1.079	1.032	1.098	1.136	1.165	1.053	1.29		1.047	1.052	1.043	1.027	1.089	1.169		0.9	0.351744	0.17	-0.16	0.78	0.9	0.277738	0.22	-0.15	0.66	0.89	0.354991	0.17	-0.16	0.78
397	317373579	Q14249	NUCG	Endonuclease G, mitochondrial	297	32.6	9.5		0.9	0.934	1.024	0.916	1.179	0.813	1.103	0.813	0.957	0.947	0.99	0.978	0.877	0.768	0.831	0.743	0.894	0.768		0.953	0.969	0.957	0.972	0.825	0.801		1.19	0.652399	0.06	0.25	1.19	1.21	0.267756	0.23	0.27	0.64	1.19	0.334033	0.18	0.26	0.75
398	12643665	O95817	BAG3	BAG family molecular chaperone regulator 3	575	61.6	6.95		0.914	0.94	0.998	0.974	1.047	0.962	0.973	0.935	0.953	1.029	1.056	1.004	1.063	1.054	1.121	1.042	0.972	1.068		0.951	0.994	0.953	1.03	1.079	1.027		0.93	0.464063	0.11	-0.11	0.95	0.97	0.127331	0.44	-0.05	0.35	0.93	0.606262	0.07	-0.11	1.14
399	12643661	O95429	BAG4	BAG family molecular chaperone regulator 4	457	49.6	5.12		0.833	1.014	0.982	1.079	0.528	1.119	0.934	1.068	1.074	1.043	0.869	1.085	0.927	0.983	1.015	0.986	0.704	1.035		0.943	0.909	1.026	0.999	0.975	0.908		1.04	0.059522	0.78	0.05	0.11	1	0.0500023	1	0	0	1.13	0.169098	0.36	0.18	0.45
400	2493285	P55957	BID	BH3-interacting domain death agonist	195	22	5.44		1.122	0.959	0.99	1.095	1.465	1.105	1.008	1.088	1.113	1.016	1.015	1.055	1.028	1.146	1.19	0.986	1.113	1.1		1.024	1.222	1.069	1.029	1.121	1.066		0.96	0.0961344	0.54	-0.06	0.26	1.15	0.21122	0.29	0.2	0.53	1	0.0503646	0.96	0	0.02
401	33860140	Q13625	ASPP2	Apoptosis-stimulating of p53 protein 2	1128	125.5	6.07		0.814	1.002	0.956	0.916	0.747	1.027	0.767	0.861	0.849	0.989	1.017	0.984	1.073	0.923	1.124	0.982	0.988	0.938		0.924	0.897	0.826	0.997	1.04	0.969		0.95	0.113529	0.48	-0.07	0.32	0.92	0.13182	0.43	-0.11	0.37	0.85	0.967834	0.01	-0.23	1.89
402	575773389	Q13315	ATM	Serine-protein kinase ATM	3056	350.5	6.81		1.236	0.848	1.225	0.932	0.787	0.897	0.975	0.906	0.904	0.788	0.929	0.934	0.915	0.863	0.922	0.944	0.798	1.067		1.103	0.872	0.928	0.884	0.9	0.936		1.18	0.186145	0.33	0.24	0.49	0.93	0.105663	0.51	-0.1	0.29	0.99	0.0510351	0.93	-0.01	0.03
403	60393639	Q13546	RIPK1	Receptor-interacting serine/threonine-protein kinase 1	671	75.9	6.33		1.001	0.935	0.998	0.968	0.887	1.033	0.941	0.975	0.998	1.013	1.04	1.003	1.139	1.14	1.109	1.053	1.008	0.978		0.978	0.963	0.971	1.019	1.129	1.013		0.97	0.19225	0.31	-0.05	0.5	0.95	0.170506	0.35	-0.07	0.46	0.96	0.304074	0.2	-0.06	0.69
404	135298	P05412	JUN	Transcription factor AP-1	331	35.7	8.76		1.12	1.142	1.038	1	1.357	0.955	0.995	0.907	1.05	0.974	0.891	0.92	0.946	0.824	0.931	1.027	0.979	1.009		1.1	1.104	0.984	0.929	0.901	1.005		1.09	0.712729	0.05	0.13	1.3	1.1	0.114823	0.48	0.14	0.32	0.98	0.0745205	0.66	-0.03	0.18
405	269849759	P04637	P53	Cellular tumor antigen p53	393	43.6	6.79		0.971	1.014	1.002	1.01	0.992	1.017	1.032	1.003	1.018	1.014	0.96	0.971	0.99	1.014	1.011	1.027	1.032	1.065		0.996	1.006	1.018	0.982	1.005	1.042		0.96	0.67724	0.06	-0.07	1.23	0.97	0.65589	0.07	-0.05	1.17	0.98	0.340751	0.18	-0.03	0.75
406	2810997	O00273	DFFA	DNA fragmentation factor subunit alpha	331	36.5	4.79		1.014	0.989	1.034	1.044	0.954	1.038	1.039	1.049	1.046	1.037	1.108	1.06	1.078	1.064	1.066	0.948	0.975	0.912		1.012	1.012	1.045	1.068	1.069	0.945		1.07	0.779775	0.04	0.1	1.39	1.07	0.445987	0.12	0.1	0.92	1.11	0.997251	0.01	0.14	2.23
407	83300977	P42575	CASP2	Caspase-2	452	50.7	6.81		0.833	0.883	0.708	0.846	0.861	0.682	0.873	0.695	0.729	0.862	1.055	1.069	0.949	1.064	1.052	0.819	0.909	0.933		0.808	0.797	0.766	0.995	1.022	0.887		0.91	0.223641	0.28	-0.13	0.56	0.9	0.246048	0.25	-0.15	0.6	0.86	0.417321	0.13	-0.21	0.87
408	2493531	Q14790	CASP8	Caspase-8	479	55.4	5.1		1.055	0.941	0.94	0.927	1.03	0.902	0.988	1.038	0.964	0.958	1.014	1.051	0.963	0.92	0.971	0.919	0.984	1.032		0.979	0.953	0.997	1.008	0.951	0.978		1	0.0500421	0.99	0	0	0.97	0.0757451	0.65	-0.04	0.19	1.02	0.075046	0.67	0.03	0.18
409	115612	P04632	CPNS1	Calpain small subunit 1	268	28.3	5.2		0.888	0.922	0.952	1.037	0.639	1.006	0.889	1.039	0.979	0.949	0.996	0.95	0.935	1.235	0.958	1.017	0.97	1.193		0.921	0.894	0.969	0.965	1.043	1.06		0.87	0.454157	0.12	-0.2	0.92	0.84	0.19332	0.32	-0.25	0.5	0.91	0.188628	0.32	-0.13	0.49
410	115574	P07384	CAN1	Calpain-1 catalytic subunit	714	81.8	5.67		0.936	1.018	1.018	0.992	0.798	1.049	0.991	0.997	1.021	1.038	1.075	1.03	1.055	1.028	1.049	0.911	0.999	0.953		0.991	0.946	1.003	1.048	1.044	0.954		1.04	0.156911	0.39	0.05	0.41	0.99	0.0510629	0.93	-0.01	0.03	1.05	0.397264	0.15	0.07	0.83
411	317373596	P17655	CAN2	Calpain-2 catalytic subunit	700	79.9	4.98		0.885	0.897	0.951	0.996	0.738	1.032	0.905	0.993	0.947	1.04	0.993	0.988	1.053	1.007	1.088	0.939	0.977	0.867		0.911	0.922	0.948	1.007	1.049	0.928		0.98	0.0713377	0.68	-0.03	0.16	0.99	0.050399	0.96	-0.01	0.02	1.02	0.075467	0.64	0.03	0.19
412	33112239	Q9Y6W3	CAN7	Calpain-7	813	92.6	7.65		1.041	0.955	1.01	1.112	0.965	1.032	0.949	1.074	1.024	0.909	1.037	1.001	0.981	0.854	1.006	0.851	1.003	0.819		1.002	1.037	1.016	0.982	0.947	0.891		1.12	0.388357	0.15	0.17	0.83	1.16	0.483647	0.11	0.22	0.96	1.14	0.411579	0.14	0.19	0.86
413	13431764	O95831	AIFM1	Apoptosis-inducing factor 1, mitochondrial	613	66.9	8.95		1.077	1.065	0.984	1	1.179	0.988	1.087	1.045	1.027	1.04	0.963	1.005	0.975	0.929	0.946	0.992	1.031	0.902		1.042	1.055	1.053	1.003	0.95	0.975		1.07	0.260747	0.23	0.1	0.63	1.08	0.182164	0.33	0.11	0.48	1.08	0.410314	0.14	0.11	0.86
414	728955	Q07817	B2CL1	Bcl-2-like protein 1	233	26	4.93		0.997	1.076	0.93	1.033	1.073	0.984	1.123	0.947	1.032	1.009	1.004	0.959	0.974	0.923	0.996	1.035	1.047	1.135		1.001	1.03	1.034	0.991	0.964	1.072		0.93	0.247488	0.25	-0.1	0.61	0.96	0.165928	0.36	-0.06	0.45	0.96	0.0935368	0.55	-0.05	0.26
415	83304396	Q07820	MCL1	Induced myeloid leukemia cell differentiation protein Mcl-1	350	37.3	5.66		1.085	1.16	1.189	1.048	1.079	1.074	0.753	0.779	0.946	1.138	0.979	1.036	1.089	1.111	1.095	1.168	1.099	1.068		1.145	1.067	0.826	1.051	1.098	1.112		1.03	0.114288	0.48	0.04	0.32	0.96	0.277148	0.22	-0.06	0.65	0.74	0.966512	0.01	-0.43	1.88
416	12643387	P98170	XIAP	E3 ubiquitin-protein ligase XIAP	497	56.6	6.65		1.16	0.981	1.114	0.953	1.402	1.083	0.896	0.893	1.012	0.989	1.097	1.042	1.071	1.036	1.1	0.994	0.984	0.979		1.085	1.146	0.934	1.043	1.069	0.985		1.1	0.412284	0.14	0.14	0.86	1.16	0.208491	0.3	0.22	0.53	0.95	0.23208	0.26	-0.08	0.59
417	109940027	Q13075	BIRC1	Baculoviral IAP repeat-containing protein 1	1403	159.5	5.99		0.927	1.072	0.975	0.98	0.82	1.144	0.933	0.961	1.09	0.959	1.078	1.03	0.969	0.917	1.04	1.076	0.964	0.961		0.991	0.981	0.995	1.022	0.975	1		0.99	0.0526569	0.88	-0.01	0.05	0.98	0.0537825	0.86	-0.03	0.06	0.99	0.0507067	0.93	-0.01	0.03
418	313104079	Q9NR09	BIRC6	Baculoviral IAP repeat-containing protein 6	4857	529.9	6.05		0.966	0.945	0.947	0.966	0.995	0.977	0.996	0.94	0.913	1.017	1.092	1.053	1.022	1.026	0.986	1.005	1.032	1.105		0.953	0.979	0.949	1.054	1.011	1.047		0.91	0.800033	0.04	-0.14	1.44	0.94	0.530132	0.09	-0.1	1.03	0.91	0.648771	0.06	-0.14	1.2
419	353526346	Q9BZZ5	API5	Apoptosis inhibitor 5	524	59	7.34		0.932	0.975	1.003	0.996	0.844	1.031	0.989	1.006	1.015	0.951	0.989	0.988	0.996	0.944	0.944	0.932	1.043	0.903		0.97	0.957	1.003	0.976	0.961	0.96		1.01	0.05475	0.84	0.02	0.08	1	0.0501875	0.97	0	0.01	1.05	0.157086	0.37	0.06	0.43
420	125527	P19525	E2AK2	Interferon-induced, double-stranded RNA-activated protein kinase	551	62.1	8.4		0.944	0.953	1.049	1.04	0.948	1.002	0.96	1.023	0.962	1.035	1.086	1.085	1.043	0.973	1.049	0.987	1.035	0.824		0.982	0.996	0.982	1.069	1.022	0.949		1.04	0.0724371	0.67	0.05	0.17	1.05	0.0997886	0.53	0.07	0.28	1.04	0.0759556	0.65	0.05	0.19
421	126302556	P20810	ICAL	Calpastatin	708	76.5	5.07		1.057	0.992	1.006	1.027	1.161	1.061	0.975	1.019	1.054	0.97	1.033	1.041	1.043	1.017	1.028	0.978	1.017	0.926		1.018	1.083	1.016	1.015	1.03	0.974		1.05	0.243996	0.25	0.06	0.6	1.11	0.556837	0.08	0.15	1.07	1.04	0.207847	0.29	0.06	0.53
422	1170596	P45985	MP2K4	Dual specificity mitogen-activated protein kinase kinase 4	399	44.3	8.07		1.125	1.122	1.02	1.088	1.396	0.922	1.122	0.972	1.087	1.004	0.953	0.951	1.004	0.979	0.978	1.014	0.959	1.099		1.089	1.135	1.06	0.969	0.987	1.024		1.06	0.211478	0.29	0.09	0.54	1.11	0.113678	0.49	0.15	0.31	1.04	0.0876037	0.59	0.05	0.23
423	74735517	O75569	PRKRA	Interferon-inducible double-stranded RNA-dependent protein kinase activator A	313	34.4	8.41		1.078	1.014	0.993	1.06	0.896	1.064	0.955	1.058	1.081	1.017	0.948	0.986	0.963	0.99	0.985	1.003	0.948	1.099		1.028	1.007	1.031	0.984	0.979	1.017		1.01	0.0549658	0.83	0.02	0.08	0.99	0.052128	0.89	-0.01	0.05	1.01	0.056069	0.82	0.02	0.09
424	17380230	Q9UGN5	PARP2	Poly [ADP-ribose] polymerase 2	583	66.2	8.88		0.885	0.869	0.917	0.931	0.78	0.892	0.925	0.909	0.919	1.003	1.018	1.017	0.954	0.951	0.92	0.931	1.026	0.891		0.89	0.868	0.918	1.012	0.942	0.95		0.94	0.266715	0.24	-0.09	0.63	0.91	0.250114	0.25	-0.13	0.61	0.97	0.11827	0.47	-0.05	0.33
425	130781	P09874	PARP1	Poly [ADP-ribose] polymerase 1	1014	113	8.88		1.021	1.043	1.003	1	0.988	1.016	1.045	1.031	1.017	1.009	1.005	0.989	0.985	0.953	0.991	1.003	1.008	0.944		1.022	1.001	1.031	1.001	0.976	0.985		1.04	0.315095	0.19	0.05	0.72	1.02	0.106695	0.51	0.02	0.29	1.05	0.492083	0.11	0.07	0.97
426	308153574	Q9UKK3	PARP4	Poly [ADP-ribose] polymerase 4	1724	192.5	5.66		0.956	0.887	0.988	0.985	0.714	0.895	0.895	0.961	0.964	1.058	1.042	1.008	0.956	0.979	0.926	1.012	0.952	0.935		0.944	0.864	0.94	1.036	0.954	0.966		0.98	0.0863441	0.58	-0.03	0.24	0.89	0.214295	0.29	-0.16	0.54	0.97	0.119583	0.47	-0.04	0.33
427	23503103	Q12933	TRAF2	TNF receptor-associated factor 2	501	55.8	7.53		1.006	0.968	1.017	0.972	0.995	0.957	0.891	0.927	0.951	1.05	1.042	1.149	1.097	0.991	1.115	1.023	1.066	0.975		0.997	0.974	0.923	1.08	1.068	1.022		0.98	0.124364	0.46	-0.04	0.34	0.95	0.352787	0.17	-0.07	0.76	0.9	0.815872	0.04	-0.15	1.45
428	1168542	P18846	ATF1	Cyclic AMP-dependent transcription factor ATF-1	271	29.2	8.37		0.779	0.831	0.822	0.961	0.542	1.119	0.927	1.047	0.884	0.823	0.837	0.886	0.928	1.097	0.992	1.061	0.792	1.713		0.81	0.874	0.953	0.849	1.006	1.189		0.68	0.25789	0.24	-0.55	0.62	0.74	0.153359	0.39	-0.44	0.41	0.8	0.128312	0.44	-0.32	0.35
429	55977474	P68363	TBA1B	Tubulin alpha-1B chain	451	50.1	5.06		0.726	0.829	0.931	0.994	0.867	0.939	1.007	0.905	0.985	1.02	1.001	1.268	1.121	1.375	1.099	1.254	1.127	1.364		0.828	0.933	0.966	1.096	1.198	1.248		0.66	0.984355	0.01	-0.59	2.01	0.75	0.95245	0.02	-0.42	1.81	0.77	0.92193	0.02	-0.37	1.7
430	55977476	P68366	TBA4A	Tubulin alpha-4A chain	448	49.9	5.06		0.937	0.963	0.993	1.003	0.8	1.054	0.945	1.079	1.036	0.938	1.011	0.949	0.995	1.129	1.004	1.026	0.979	1.067		0.964	0.952	1.02	0.966	1.043	1.024		0.94	0.45947	0.12	-0.09	0.93	0.93	0.134434	0.43	-0.1	0.37	1	0.0507727	0.94	-0.01	0.03
431	20455322	Q9BQE3	TBA1C	Tubulin alpha-1C chain	449	49.9	5.1		0.958	0.891	1.006	0.984	1.178	1.014	0.892	0.97	1.01	0.861	0.939	0.983	0.968	1.138	1.019	1.009	0.882	1.173		0.952	1.059	0.957	0.928	1.042	1.021		0.93	0.112778	0.48	-0.1	0.32	1.04	0.0644033	0.74	0.05	0.13	0.94	0.103345	0.52	-0.09	0.28
432	68067549	P07858	CATB	Cathepsin B	339	37.8	6.3		0.989	1.006	1.052	1.027	0.743	1.006	1.034	1.108	1.117	1.034	0.951	0.968	0.955	1.031	0.977	1.063	0.964	1.143		1.016	0.925	1.087	0.984	0.988	1.057		0.96	0.109923	0.5	-0.06	0.3	0.88	0.221992	0.28	-0.19	0.56	1.03	0.0786817	0.64	0.04	0.2
433	317373330	P53634	CATC	Dipeptidyl peptidase 1	463	51.8	6.99		0.967	0.971	0.959	1.046	0.812	0.985	1.035	1.028	1.019	1.006	1.029	0.947	1.023	1.051	1.035	1.1	1.049	1.233		0.966	0.948	1.027	0.994	1.036	1.128		0.86	0.769089	0.04	-0.22	1.37	0.84	0.470671	0.11	-0.25	0.94	0.91	0.404602	0.14	-0.13	0.84
434	115717	P07339	CATD	Cathepsin D	412	44.5	6.54		1.015	1.057	1.055	1.07	0.922	0.991	1.083	1.073	1.023	0.998	0.939	0.928	0.994	0.957	0.967	1.044	1.042	1.023		1.042	0.994	1.06	0.955	0.973	1.036		1.01	0.0666263	0.71	0.01	0.15	0.96	0.152417	0.39	-0.06	0.41	1.02	0.21116	0.31	0.03	0.51
435	115741	P07711	CATL1	Cathepsin L1	333	37.5	5.45		0.984	1.004	0.974	1.005	0.958	1.012	1.017	1.02	1.034	0.937	0.911	0.93	0.922	0.934	0.893	1.059	1.031	1.052		0.987	0.992	1.024	0.926	0.916	1.047		0.94	0.991419	0.01	-0.08	2.09	0.95	0.75803	0.04	-0.08	1.38	0.98	0.575519	0.08	-0.03	1.12
436	12643324	Q9UBR2	CATZ	Cathepsin Z	303	33.8	7.11		0.985	1.024	1.092	1.038	1.036	1.039	1.055	1.149	1	0.791	0.766	0.826	0.811	0.98	0.836	1.109	0.819	1.485		1.034	1.038	1.068	0.794	0.876	1.137		0.91	0.0798918	0.62	-0.14	0.2	0.91	0.0783296	0.63	-0.13	0.2	0.94	0.0630398	0.74	-0.09	0.13
437	150417955	Q96HS1	PGAM5	Serine/threonine-protein phosphatase PGAM5, mitochondrial	289	32	8.68		0.993	1.013	0.977	0.979	1.219	0.984	0.981	1.037	1.01	1.043	0.994	0.992	0.962	1.01	0.988	1.009	1.004	1.1		0.995	1.061	1.009	1.01	0.987	1.038		0.96	0.235902	0.26	-0.06	0.59	1.02	0.0578011	0.8	0.03	0.1	0.97	0.123823	0.46	-0.04	0.33
438	125987821	O00429	DNM1L	Dynamin-1-like protein	736	81.8	6.81		0.986	0.981	1.043	0.998	0.991	1.031	0.958	0.997	0.985	0.978	0.954	1.031	1.05	1.096	1.022	1.007	0.992	1.035		1.003	1.007	0.98	0.988	1.056	1.011		0.99	0.0623515	0.75	-0.01	0.13	1	0.0554929	0.8	-0.01	0.1	0.97	0.397604	0.14	-0.05	0.85
439	34395942	P13747	HLAE	HLA class I histocompatibility antigen, alpha chain E	358	40.1	5.95		0.849	0.886	0.949	0.899	1.125	0.901	0.882	0.865	0.926	0.888	0.971	0.956	1.028	1.061	0.962	0.997	1.007	1.127		0.895	0.975	0.891	0.939	1.017	1.044		0.86	0.762877	0.04	-0.22	1.37	0.93	0.119988	0.47	-0.1	0.33	0.85	0.861494	0.03	-0.23	1.55
440	131875	P01116	RASK	GTPase KRas	189	21.6	6.77		0.946	1.039	1.008	1.026	1.207	0.906	0.984	0.968	0.996	0.919	0.909	0.893	0.878	1.047	0.854	1.086	0.903	1.38		0.998	1.046	0.983	0.907	0.926	1.123		0.89	0.13459	0.43	-0.17	0.37	0.93	0.0736013	0.66	-0.1	0.18	0.87	0.160099	0.37	-0.19	0.43
441	131883	P01111	RASN	GTPase NRas	189	21.2	5.17		1.008	0.959	0.922	0.974	0.899	0.941	0.945	1.007	1.013	1.02	1.048	1.069	0.966	0.957	1.028	0.863	1.023	0.878		0.963	0.938	0.988	1.046	0.984	0.921		1.05	0.109189	0.5	0.06	0.3	1.02	0.0600495	0.78	0.03	0.11	1.07	0.208975	0.29	0.1	0.53
442	133486	P10301	RRAS	Ras-related protein R-Ras	218	23.5	6.93		0.889	0.926	0.833	1.044	0.95	1.164	1.156	1.14	1.083	1.049	0.924	0.912	0.976	1.136	1.018	1.103	1.013	1.116		0.883	1.053	1.126	0.962	1.043	1.078		0.82	0.983762	0.01	-0.29	2.01	0.98	0.0636934	0.74	-0.03	0.13	1.05	0.212966	0.28	0.06	0.55
443	49065833	P62070	RRAS2	Ras-related protein R-Ras2	204	23.4	6.01		0.845	0.948	0.934	0.926	0.562	0.931	0.928	0.941	0.943	0.946	0.963	0.942	0.953	0.954	0.996	1.078	1.028	1.005		0.909	0.806	0.937	0.95	0.968	1.037		0.88	0.850098	0.03	-0.19	1.52	0.78	0.414018	0.14	-0.36	0.86	0.9	0.980587	0.01	-0.15	1.97
444	60391226	P31749	AKT1	RAC-alpha serine/threonine-protein kinase	480	55.7	6.07		0.953	0.969	1.044	1.052	0.948	1.093	0.995	1.095	1.074	1.041	1.083	1.104	1.073	1.19	1.042	1.206	0.91	1.222		0.989	1.031	1.055	1.076	1.102	1.112		0.89	0.198773	0.3	-0.17	0.52	0.93	0.108382	0.5	-0.11	0.3	0.95	0.0811423	0.61	-0.08	0.21
445	6919957	Q15382	RHEB	GTP-binding protein Rheb	184	20.5	5.92		0.76	0.942	1.014	1.01	0.661	0.992	0.984	1.043	0.992	0.938	0.943	0.968	0.988	1.052	0.967	1.034	0.891	1.194		0.905	0.888	1.006	0.949	1.002	1.039		0.87	0.196272	0.31	-0.2	0.51	0.85	0.170906	0.35	-0.23	0.46	0.97	0.0645692	0.73	-0.05	0.14
446	1169735	P42345	MTOR	Serine/threonine-protein kinase mTOR	2549	288.7	7.17		0.967	1.06	0.996	0.946	1.011	1.044	1.029	1.051	1.02	0.99	1.102	1.065	1.007	1.043	1.079	1.011	1.06	0.944		1.008	1	1.033	1.052	1.043	1.005		1	0.0505087	0.96	0	0.02	1	0.0513601	0.92	-0.01	0.04	1.03	0.119899	0.46	0.04	0.34
447	42560209	P60484	PTEN	Phosphatidylinositol 3,4,5-trisphosphate 3-phosphatase and dual-specificity protein phosphatase PTEN	403	47.1	6.37		0.89	0.925	1.052	1.082	0.858	1.104	0.938	1.051	1.055	1.049	0.956	0.968	1.021	1.03	0.943	0.864	1.056	1.137		0.956	1.015	1.015	0.991	0.998	1.019		0.94	0.0977222	0.54	-0.09	0.27	1	0.0501339	0.97	-0.01	0.01	1	0.0502125	0.96	-0.01	0.02
448	38258633	Q96EB6	SIR1	NAD-dependent protein deacetylase sirtuin-1	747	81.6	4.67		0.884	0.895	0.878	0.873	0.684	1.053	0.923	0.872	1.036	1.108	1.079	1.062	1.055	0.966	1.026	0.925	1.127	0.917		0.886	0.87	0.944	1.083	1.016	0.99		0.89	0.296249	0.2	-0.16	0.69	0.88	0.147401	0.4	-0.19	0.4	0.95	0.0821927	0.61	-0.07	0.21
449	313104222	Q6MZP7	LIN54	Protein lin-54 homolog	749	79.4	9.01		1.002	1.005	0.998	1.045	1.116	0.944	0.955	0.957	0.914	0.852	0.805	0.935	0.976	1.164	0.86	1.076	1.051	1.338		1.002	1.035	0.942	0.864	1	1.155		0.87	0.347099	0.17	-0.2	0.77	0.9	0.193706	0.32	-0.16	0.5	0.82	0.566305	0.08	-0.29	1.08
450	1172846	Q09028	RBBP4	Histone-binding protein RBBP4	425	47.6	4.89		1.032	0.991	0.983	0.954	1.438	0.875	0.962	0.945	0.978	1.089	1.051	1.031	1.025	0.895	1.019	0.936	1.026	0.864		1.002	1.089	0.962	1.057	0.98	0.942		1.06	0.211577	0.29	0.09	0.54	1.16	0.120592	0.47	0.21	0.33	1.02	0.0687444	0.7	0.03	0.15
451	13124267	Q9UKB1	FBW1B	F-box/WD repeat-containing protein 11	542	62.1	7.12		1.098	1.052	1.073	0.988	1.253	1.058	1.105	1.005	1.025	1.137	1.077	1.109	1.207	1.157	1.056	1.084	1.015	0.97		1.074	1.099	1.045	1.108	1.14	1.023		1.05	0.271034	0.23	0.07	0.64	1.07	0.134901	0.42	0.1	0.37	1.02	0.0755678	0.65	0.03	0.19
452	49065811	P62136	PP1A	Serine/threonine-protein phosphatase PP1-alpha catalytic subunit	330	37.5	6.33		0.737	0.899	0.91	0.909	0.488	1.079	0.891	1.061	0.965	0.901	0.811	0.896	0.966	1.047	1.06	1.088	0.957	1.474		0.849	0.826	0.972	0.869	1.024	1.173		0.72	0.44999	0.12	-0.47	0.92	0.7	0.287115	0.21	-0.51	0.67	0.83	0.215989	0.29	-0.27	0.54
453	49065814	P62140	PP1B	Serine/threonine-protein phosphatase PP1-beta catalytic subunit	327	37.2	6.19		0.924	0.921	0.953	1.01	0.962	0.987	0.965	0.94	0.976	0.943	0.966	0.978	0.978	0.926	0.974	1	0.976	0.885		0.933	0.987	0.96	0.963	0.959	0.954		0.98	0.0856641	0.59	-0.03	0.23	1.03	0.133299	0.43	0.05	0.36	1.01	0.0528644	0.87	0.01	0.06
454	548573	P36873	PP1G	Serine/threonine-protein phosphatase PP1-gamma catalytic subunit	323	37	6.54		1.025	0.99	1.006	0.957	0.762	0.983	0.904	0.965	1.062	1.06	0.973	1.006	0.993	1.009	0.965	1.082	1.027	1.101		1.007	0.901	0.977	1.013	0.989	1.07		0.94	0.662983	0.06	-0.09	1.22	0.84	0.571565	0.08	-0.25	1.09	0.91	0.399691	0.14	-0.13	0.85
455	400274	Q02750	MP2K1	Dual specificity mitogen-activated protein kinase kinase 1	393	43.4	6.62		0.888	0.975	1.053	1.042	0.588	1.065	0.876	1.074	1.025	0.946	1.001	1.045	1.03	0.962	0.969	0.922	0.959	1.002		0.972	0.898	0.991	0.997	0.987	0.961		1.01	0.0546022	0.84	0.02	0.07	0.93	0.0672434	0.71	-0.1	0.15	1.03	0.0736757	0.66	0.05	0.18
456	547915	P36507	MP2K2	Dual specificity mitogen-activated protein kinase kinase 2	400	44.4	6.55		0.979	0.938	0.974	1.019	0.847	0.984	0.935	0.997	0.982	0.957	1.007	1.031	1.058	1.187	1.106	1.071	0.975	1.252		0.964	0.95	0.971	0.998	1.117	1.099		0.88	0.338863	0.17	-0.19	0.76	0.86	0.306129	0.2	-0.21	0.71	0.88	0.304571	0.2	-0.18	0.7
457	119554	P28482	MK01	Mitogen-activated protein kinase 1	360	41.4	6.98		1.075	0.982	1.046	0.982	1.297	1.015	0.992	0.98	0.961	0.959	0.98	0.982	0.978	1.064	0.996	0.991	0.972	0.896		1.035	1.098	0.978	0.974	1.012	0.953		1.09	0.481025	0.11	0.12	0.95	1.15	0.260657	0.24	0.2	0.62	1.03	0.123334	0.47	0.04	0.33
458	24638466	P46734	MP2K3	Dual specificity mitogen-activated protein kinase kinase 3	347	39.3	7.43		0.948	1	0.984	1.027	0.845	0.996	0.941	0.955	1.011	0.925	1.016	1.029	1.013	1.006	0.994	0.916	0.963	1.004		0.978	0.956	0.969	0.99	1.004	0.961		1.02	0.0852319	0.6	0.02	0.22	0.99	0.0506998	0.94	-0.01	0.03	1.01	0.0561906	0.82	0.01	0.09
459	2499600	Q16539	MK14	Mitogen-activated protein kinase 14	360	41.3	5.78		1.051	1.097	1.103	1.07	1.198	1.05	0.994	1.035	1.007	0.885	0.959	1.054	0.954	0.962	1.007	0.885	0.982	1.015		1.084	1.106	1.012	0.966	0.974	0.96		1.13	0.764269	0.04	0.17	1.36	1.15	0.605849	0.07	0.2	1.13	1.05	0.226388	0.27	0.08	0.56
460	17380137	P49959	MRE11	Double-strand break repair protein MRE11A	708	80.5	5.9		1.005	0.969	0.967	0.975	1.036	0.936	1.006	1.004	1.051	1.004	0.991	0.967	0.998	0.975	1.009	0.991	1.028	1.016		0.98	0.983	1.02	0.987	0.994	1.012		0.97	0.442504	0.13	-0.05	0.89	0.97	0.144647	0.41	-0.04	0.39	1.01	0.0693649	0.67	0.01	0.18
461	60392986	Q92878	RAD50	DNA repair protein RAD50	1312	153.8	6.89		1.035	1.052	1.019	1.028	0.937	1.026	1.043	0.991	1.031	0.988	0.998	0.993	0.97	0.978	0.998	1.015	1.041	0.984		1.035	0.997	1.022	0.993	0.982	1.013		1.02	0.195544	0.31	0.03	0.51	0.98	0.0734419	0.66	-0.02	0.18	1.01	0.0667292	0.73	0.01	0.14
462	74762960	O60934	NBN	Nibrin	754	84.9	6.9		1.034	1.06	0.971	1.038	1.031	1.013	1.054	0.99	1.024	1.162	1.343	1.128	1.184	1.093	1.015	0.848	1.201	1.001		1.021	1.027	1.023	1.211	1.097	1.017		1	0.050153	0.97	0.01	0.02	1.01	0.0510149	0.92	0.02	0.04	1.01	0.0503556	0.95	0.01	0.02
463	21542418	P19838	NFKB1	Nuclear factor NF-kappa-B p105 subunit	968	105.3	5.4		1.035	1.025	1.105	1.026	1.079	1.074	1.054	1.057	1.087	0.921	1.012	0.969	0.954	1.007	0.93	0.911	0.99	0.939		1.055	1.06	1.066	0.967	0.963	0.947		1.11	0.820628	0.03	0.16	1.46	1.12	0.942936	0.02	0.16	1.77	1.13	0.985657	0.01	0.17	2.02
464	62906901	Q04206	TF65	Transcription factor p65	551	60.2	5.68		0.956	0.999	1.047	1.002	0.934	1.037	0.995	0.969	0.99	1.049	1.066	1.044	1.1	1.039	1.074	0.98	1.035	0.881		1	0.991	0.985	1.053	1.071	0.965		1.04	0.0985938	0.54	0.05	0.27	1.03	0.0746423	0.66	0.04	0.18	1.02	0.0704844	0.69	0.03	0.16
465	1346538	P49137	MAPK2	MAP kinase-activated protein kinase 2	400	45.5	8.68		1.017	0.943	1.028	1.04	1.085	1.067	1.014	0.972	1.028	1.096	1.112	1.021	0.995	1.073	1.017	0.98	0.954	0.988		0.996	1.064	1.005	1.076	1.028	0.974		1.02	0.114069	0.48	0.03	0.31	1.09	0.997284	0.01	0.13	2.25	1.03	0.31635	0.2	0.04	0.7
466	1351254	Q07352	TISB	Zinc finger protein 36, C3H1 type-like 1	338	36.3	7.96		1.179	1.112	1.187	0.915	1.739	1.063	1.125	1.107	1.041	1.123	1.037	1.074	1.015	1.073	1.112	1.135	1.205	1.033		1.159	1.239	1.091	1.078	1.067	1.125		1.03	0.0907175	0.56	0.04	0.25	1.1	0.0708545	0.68	0.14	0.17	0.97	0.0895872	0.58	-0.04	0.24
467	49037474	P62158	CALM	Calmodulin	149	16.8	4.22		1.031	0.993	0.986	1.006	1.044	1.01	0.978	1.025	0.99	0.96	1.025	1.002	1.006	1.021	1.008	1.006	0.984	0.923		1.004	1.02	0.998	0.996	1.012	0.971		1.03	0.196121	0.32	0.05	0.5	1.05	0.384018	0.15	0.07	0.83	1.03	0.147209	0.4	0.04	0.4
468	1352673	Q08209	PP2BA	Serine/threonine-protein phosphatase 2B catalytic subunit alpha isoform	521	58.7	5.86		1.127	1.005	0.998	1.092	1.562	1.027	1.144	0.967	0.97	0.943	1.083	0.983	1.049	0.961	1.018	0.982	1.068	0.904		1.043	1.227	1.027	1.003	1.009	0.985		1.06	0.141422	0.41	0.08	0.39	1.25	0.257456	0.24	0.32	0.62	1.04	0.0834906	0.61	0.06	0.22
469	60659599	P16298	PP2BB	Serine/threonine-protein phosphatase 2B catalytic subunit beta isoform	524	59	5.91		0.946	0.899	0.912	0.97	0.975	1.087	0.954	1.002	0.877	1.056	1.012	1.035	1.057	0.858	0.978	0.9	0.968	0.924		0.919	1.011	0.945	1.034	0.964	0.931		0.99	0.0760839	0.66	-0.02	0.18	1.09	0.412396	0.14	0.12	0.87	1.01	0.0621745	0.75	0.02	0.12
470	317373597	P05141	ADT2	ADP/ATP translocase 2	298	32.8	9.69		0.965	1.035	0.996	1.023	0.74	0.987	1.073	1.073	1.048	0.988	0.939	0.932	0.938	1.014	0.963	1.09	0.962	1.127		0.999	0.917	1.065	0.953	0.972	1.059		0.94	0.184789	0.33	-0.08	0.49	0.87	0.260264	0.24	-0.21	0.63	1.01	0.0514941	0.92	0.01	0.04
471	729274	Q08752	PPID	Peptidyl-prolyl cis-trans isomerase D	370	40.7	7.21		0.75	0.767	0.853	0.889	0.705	1.223	0.796	1.094	0.93	0.986	0.999	0.987	1.035	1.153	1.059	1.077	0.928	1.26		0.79	0.939	0.94	0.991	1.082	1.088		0.73	0.768603	0.04	-0.46	1.38	0.86	0.124741	0.45	-0.21	0.35	0.86	0.193357	0.31	-0.21	0.5
472	130683	P21796	VDAC1	Voltage-dependent anion-selective channel protein 1	283	30.8	8.54		0.957	1.03	1.005	1.019	0.978	0.973	1.043	1.03	1.021	1.029	0.958	0.94	0.971	0.969	0.947	1.046	1	1.028		0.998	0.99	1.031	0.976	0.963	1.025		0.97	0.174432	0.34	-0.04	0.47	0.97	0.381803	0.15	-0.05	0.81	1.01	0.0675382	0.7	0.01	0.16
473	158518391	P45880	VDAC2	Voltage-dependent anion-selective channel protein 2	294	31.5	7.56		1.019	1.051	0.996	1.018	0.973	1.012	1.06	1.033	1.013	1.03	0.989	0.989	0.976	0.991	0.986	1.042	1.026	1.047		1.022	1.001	1.035	1.003	0.984	1.038		0.98	0.144476	0.39	-0.02	0.41	0.96	0.600175	0.08	-0.05	1.12	1	0.054257	0.84	0	0.08
474	12643945	Q9Y277	VDAC3	Voltage-dependent anion-selective channel protein 3	283	30.6	8.66		0.931	0.971	0.938	1.003	0.702	1.006	1.014	1.08	1.009	0.973	0.9	0.913	0.95	1.024	0.955	1.136	0.954	1.168		0.946	0.904	1.035	0.929	0.976	1.086		0.87	0.485922	0.11	-0.2	0.96	0.83	0.294996	0.21	-0.27	0.68	0.95	0.106632	0.51	-0.07	0.29
475	74730222	Q8NE86	MCU	Calcium uniporter protein, mitochondrial	351	39.8	8.65		0.75	0.92	0.941	1.052	1.05	1.069	1.055	1.06	0.971	0.984	0.885	0.88	0.989	0.947	0.921	1.013	0.96	1.091		0.87	1.057	1.028	0.916	0.952	1.021		0.85	0.502898	0.1	-0.23	1	1.03	0.144916	0.41	0.05	0.39	1.01	0.0522905	0.89	0.01	0.05
476	2498390	Q12841	FSTL1	Follistatin-related protein 1	308	35	5.52		1.015	1.008	0.949	0.973	0.845	1.008	0.965	0.985	0.939	1.015	0.967	0.948	0.936	0.917	0.968	1.034	1.012	1.089		0.99	0.942	0.963	0.977	0.94	1.045		0.95	0.383121	0.15	-0.08	0.81	0.9	0.422858	0.13	-0.15	0.88	0.92	0.805873	0.04	-0.12	1.44
477	122063496	Q5T9L3	WLS	Protein wntless homolog	541	62.2	7.36		1.153	1.149	1.091	0.961	1.353	0.85	1.001	0.944	0.915	0.966	1.073	1.044	1.029	1.019	0.987	1.087	1.028	1.176		1.131	1.055	0.953	1.028	1.011	1.097		1.03	0.105486	0.51	0.04	0.29	0.96	0.0574975	0.8	-0.06	0.1	0.87	0.752819	0.05	-0.2	1.35
478	17433019	Q14332	FZD2	Frizzled-2	565	63.5	8.1		0.995	1.06	0.918	0.997	0.692	1	0.958	0.971	0.994	1.042	0.987	0.961	0.895	0.904	0.918	1.056	0.97	0.965		0.991	0.896	0.974	0.997	0.906	0.997		0.99	0.0515009	0.91	-0.01	0.04	0.9	0.148031	0.4	-0.15	0.4	0.98	0.108183	0.51	-0.03	0.3
479	317373384	Q07954	LRP1	Prolow-density lipoprotein receptor-related protein 1	4544	504.3	5.39		1	1.002	1.044	1.047	1.014	0.981	1.047	0.983	0.986	1.062	0.973	1.02	1.029	0.99	1.029	0.994	1.038	0.955		1.015	1.014	1.006	1.018	1.016	0.995		1.02	0.105383	0.51	0.03	0.29	1.02	0.0914873	0.58	0.03	0.24	1.01	0.0628215	0.76	0.01	0.12
480	74751770	Q96BJ3	AIDA	Axin interactor, dorsalization-associated protein	306	35	6.55		0.894	0.959	1.011	0.923	0.984	1.034	0.759	1.031	1.05	0.976	1.007	1.034	1.073	1.12	1.022	1.074	1.076	0.984		0.955	0.98	0.947	1.006	1.072	1.045		0.91	0.455597	0.12	-0.13	0.92	0.94	0.284423	0.22	-0.09	0.66	0.91	0.157092	0.38	-0.14	0.42
481	97535708	P25054	APC	Adenomatous polyposis coli protein	2843	311.5	7.8		1.003	0.981	0.936	0.97	1.064	0.906	0.957	1.019	0.908	0.972	1.207	1.155	1.161	1.124	1.208	1.048	1.144	0.946		0.973	0.98	0.961	1.111	1.164	1.046		0.93	0.208711	0.29	-0.1	0.53	0.94	0.138032	0.42	-0.09	0.38	0.92	0.232827	0.27	-0.12	0.58
482	52783535	P63151	2ABA	Serine/threonine-protein phosphatase 2A 55 kDa regulatory subunit B alpha isoform	447	51.7	6.2		0.919	0.93	1.046	0.971	0.887	1.054	0.969	0.907	1.022	0.932	0.978	1.009	0.994	1.028	1.017	0.928	0.957	0.906		0.965	0.971	0.966	0.973	1.013	0.93		1.04	0.12104	0.47	0.05	0.32	1.04	0.121654	0.47	0.06	0.33	1.04	0.156599	0.39	0.05	0.41
483	7387495	Q14738	2A5D	Serine/threonine-protein phosphatase 2A 56 kDa regulatory subunit delta isoform	602	69.9	8.13		0.985	0.987	0.917	0.953	1.122	0.892	0.988	0.985	0.927	0.972	1.062	1.053	1.015	1.084	1.022	1.031	1.021	1.008		0.963	0.989	0.967	1.029	1.041	1.02		0.94	0.595775	0.08	-0.08	1.11	0.97	0.0715763	0.68	-0.04	0.17	0.95	0.64616	0.06	-0.08	1.19
484	7387498	Q16537	2A5E	Serine/threonine-protein phosphatase 2A 56 kDa regulatory subunit epsilon isoform	467	54.7	6.95		1.115	1.095	0.927	0.967	0.917	0.959	1.113	1.032	0.977	0.964	0.903	0.932	0.84	0.851	0.894	0.748	0.838	0.796		1.046	0.948	1.04	0.933	0.862	0.794		1.32	0.935849	0.02	0.4	1.74	1.19	0.994073	0.01	0.26	2.15	1.31	0.995467	0.01	0.39	2.19
485	116241235	Q13362	2A5G	Serine/threonine-protein phosphatase 2A 56 kDa regulatory subunit gamma isoform	524	61	6.87		0.912	0.982	0.958	0.997	0.888	0.951	0.929	0.995	0.927	1.019	1.057	1.023	1.038	1.045	1.055	0.903	0.994	1.12		0.951	0.945	0.95	1.033	1.046	1.006		0.95	0.124877	0.45	-0.08	0.34	0.94	0.131465	0.44	-0.09	0.36	0.94	0.126292	0.45	-0.08	0.34
486	143811355	P30153	2AAA	Serine/threonine-protein phosphatase 2A 65 kDa regulatory subunit A alpha isoform	589	65.3	5.11		0.954	0.942	1.001	1.036	0.857	1.016	0.97	1.021	1.015	0.955	1.005	0.978	1.024	1.079	1.023	1.024	0.967	1.044		0.965	0.97	1.002	0.979	1.042	1.012		0.95	0.327173	0.19	-0.07	0.73	0.96	0.100946	0.53	-0.06	0.28	0.99	0.063525	0.75	-0.01	0.13
487	116241236	P30154	2AAB	Serine/threonine-protein phosphatase 2A 65 kDa regulatory subunit A beta isoform	601	66.2	4.94		0.965	1.027	0.992	1.033	0.919	0.998	1.022	0.995	1.013	1.028	1.006	1.047	1.009	1.044	1.126	0.959	1.007	0.986		0.995	0.983	1.01	1.027	1.06	0.984		1.01	0.0752167	0.65	0.02	0.19	1	0.0500801	0.99	0	0	1.03	0.333332	0.18	0.04	0.76
488	116242737	Q15257	PTPA	Serine/threonine-protein phosphatase 2A activator	358	40.6	5.94		1.017	1.043	1.016	0.999	1.243	1.009	1.004	0.991	1.036	0.936	0.999	0.989	1.029	1.029	0.99	0.854	1.014	0.821		1.025	1.084	1.011	0.975	1.016	0.896		1.14	0.512625	0.1	0.19	1	1.21	0.4234	0.13	0.27	0.88	1.13	0.421283	0.13	0.17	0.87
489	54038809	P67775	PP2AA	Serine/threonine-protein phosphatase 2A catalytic subunit alpha isoform	309	35.6	5.54		0.915	0.907	0.96	1.003	0.769	1.106	0.951	1.057	0.982	0.999	0.967	1.059	1.134	1.207	1.152	1.162	0.978	1.324		0.927	0.959	0.997	1.008	1.164	1.154		0.8	0.547758	0.09	-0.32	1.05	0.83	0.257161	0.24	-0.27	0.62	0.86	0.292666	0.21	-0.21	0.68
490	50402236	P62714	PP2AB	Serine/threonine-protein phosphatase 2A catalytic subunit beta isoform	309	35.6	5.43		1.212	1.144	1.039	1.008	0.829	1.099	1.233	0.971	1.073	0.989	1.107	0.993	1.038	0.997	1.044	0.877	1.125	0.803		1.132	0.978	1.092	1.03	1.026	0.935		1.21	0.391556	0.15	0.28	0.83	1.05	0.0625404	0.75	0.07	0.13	1.17	0.225405	0.27	0.22	0.56
491	12644292	P49840	GSK3A	Glycogen synthase kinase-3 alpha	483	50.9	8.75		0.985	0.988	0.967	0.996	0.655	1.107	0.916	1.059	1.136	1.104	1.077	1.129	1.149	1.231	1.106	1.09	1.062	1.129		0.98	0.919	1.037	1.103	1.162	1.094		0.9	0.998117	0.01	-0.16	2.3	0.84	0.226613	0.27	-0.25	0.56	0.95	0.127756	0.45	-0.08	0.35
492	20455502	P49841	GSK3B	Glycogen synthase kinase-3 beta	420	46.7	8.78		0.922	0.989	0.893	0.899	1.138	1.002	0.857	0.925	0.889	0.991	1.044	1.049	1.081	1.009	1.004	0.982	0.987	0.936		0.934	1.013	0.89	1.028	1.031	0.968		0.96	0.167424	0.36	-0.05	0.45	1.05	0.0931994	0.56	0.07	0.25	0.92	0.797679	0.04	-0.12	1.43
493	31077177	P48729	KC1A	Casein kinase I isoform alpha	337	38.9	9.57		0.933	1.001	0.978	1.009	0.743	1.06	0.965	1.022	0.971	0.972	0.99	1.014	1.014	1.058	1.035	1.061	0.993	1.084		0.971	0.937	0.986	0.992	1.036	1.046		0.93	0.539171	0.09	-0.11	1.04	0.9	0.174332	0.35	-0.16	0.46	0.94	0.403357	0.14	-0.09	0.85
494	125266	P19784	CSK22	Casein kinase II subunit alpha'	350	41.2	8.56		1.059	1.053	0.953	0.989	1.058	0.981	1.007	1.023	1.07	0.994	1.005	1.008	1.03	1.003	1	1.017	1.033	0.912		1.022	1.009	1.034	1.002	1.011	0.987		1.04	0.100447	0.53	0.05	0.27	1.02	0.0755019	0.65	0.03	0.19	1.05	0.183839	0.33	0.07	0.48
495	54037520	P67870	CSK2B	Casein kinase II subunit beta	215	24.9	5.55		0.965	1.025	1.028	1.097	0.801	1.043	0.995	1.09	0.999	0.996	1.035	1.049	1.008	0.988	1.112	1.022	1.03	0.896		1.006	0.981	1.028	1.027	1.036	0.983		1.02	0.0746428	0.66	0.03	0.18	1	0.0500419	0.98	0	0.01	1.05	0.127178	0.45	0.06	0.35
496	6919871	O14641	DVL2	Segment polarity protein dishevelled homolog DVL-2	736	78.9	6.02		0.959	0.943	0.983	0.952	1.045	1.097	0.995	0.767	1.091	1.017	1.014	1.142	1.175	1.005	1.109	0.982	1.018	0.906		0.962	1.031	0.951	1.058	1.096	0.969		0.99	0.0542679	0.85	-0.01	0.07	1.06	0.194953	0.31	0.09	0.51	0.98	0.0533479	0.87	-0.03	0.06
497	92090378	Q9UGU0	TCF20	Transcription factor 20	1960	211.6	9.04		0.911	0.932	0.924	0.929	1.026	0.96	0.929	0.912	0.927	1.136	0.988	0.99	0.979	0.913	0.97	0.965	0.921	0.828		0.922	0.972	0.923	1.038	0.954	0.905		1.02	0.0685634	0.69	0.03	0.16	1.07	0.249188	0.25	0.1	0.61	1.02	0.0709341	0.68	0.03	0.17
498	23396596	Q9BQ70	TCF25	Transcription factor 25	676	76.6	6.35		1.068	0.989	1.019	1.004	1.246	0.985	0.988	0.998	0.934	0.997	0.967	0.974	0.955	1.037	0.93	0.886	1.025	0.885		1.025	1.079	0.973	0.979	0.974	0.932		1.1	0.389812	0.15	0.14	0.83	1.16	0.302916	0.2	0.21	0.69	1.04	0.121223	0.46	0.06	0.34
499	60390962	Q9NZC9	SMAL1	SWI/SNF-related matrix-associated actin-dependent regulator of chromatin subfamily A-like protein 1	954	105.9	9.06		1.02	0.988	1.04	0.977	1.021	0.97	0.972	0.996	0.96	1.246	1.027	1.076	1.002	0.934	1.014	1.119	1.122	0.99		1.016	0.989	0.976	1.116	0.984	1.077		0.94	0.240647	0.26	-0.08	0.59	0.92	0.42693	0.13	-0.12	0.88	0.91	0.552918	0.09	-0.14	1.06
500	317373565	Q96L91	EP400	E1A-binding protein p400	3159	343.3	9.19		1.003	1.043	0.947	0.964	0.756	1.018	1.012	0.993	0.983	0.969	0.922	0.965	0.925	0.986	0.912	1.004	0.922	0.993		0.997	0.913	0.996	0.952	0.941	0.973		1.03	0.0932625	0.55	0.04	0.26	0.94	0.105269	0.51	-0.09	0.29	1.02	0.128313	0.44	0.03	0.36
501	51338799	Q12824	SNF5	SWI/SNF-related matrix-associated actin-dependent regulator of chromatin subfamily B member 1	385	44.1	6.23		1.021	1.034	0.888	0.96	1.102	0.95	0.981	0.945	0.916	0.824	0.838	0.789	0.855	0.782	0.787	0.82	0.831	0.798		0.981	1.004	0.947	0.817	0.808	0.817		1.2	0.876407	0.03	0.26	1.58	1.23	0.920141	0.02	0.3	1.7	1.16	0.999616	0	0.21	2.45
502	296452947	Q6ZRS2	SRCAP	Helicase SRCAP	3230	343.3	5.96		1.018	0.896	0.866	0.798	1.336	1.106	0.787	0.887	0.83	0.862	1.019	0.931	1.017	1.022	0.822	1.057	0.852	1.311		0.927	1.08	0.835	0.938	0.953	1.073		0.86	0.167275	0.36	-0.21	0.45	1.01	0.0501246	0.97	0.01	0.01	0.78	0.375836	0.15	-0.36	0.81
503	61247587	Q969G3	SMCE1	SWI/SNF-related matrix-associated actin-dependent regulator of chromatin subfamily E member 1	411	46.6	4.88		0.972	1.078	0.911	1.033	0.955	1.014	1.135	1.047	0.965	1.119	1.043	0.965	1.027	0.986	1.078	1.124	1.034	1.057		0.987	1.001	1.049	1.043	1.03	1.072		0.92	0.300867	0.2	-0.12	0.69	0.93	0.457094	0.12	-0.1	0.93	0.98	0.0680609	0.71	-0.03	0.15
504	322510105	Q92925	SMRD2	SWI/SNF-related matrix-associated actin-dependent regulator of chromatin subfamily D member 2	531	58.9	9.64		1.03	1.115	1.038	1.041	0.761	0.946	0.947	0.905	0.965	1.062	0.993	0.919	0.957	0.978	0.96	0.996	0.985	1.002		1.061	0.916	0.939	0.991	0.965	0.994		1.07	0.613331	0.07	0.09	1.14	0.92	0.147491	0.4	-0.12	0.4	0.94	0.777313	0.04	-0.08	1.4
505	73920185	O14497	ARI1A	AT-rich interactive domain-containing protein 1A	2285	241.9	6.7		1.042	1.001	0.961	0.944	1.195	0.98	1.035	1.018	0.964	1.157	1.081	1.09	1.078	1.105	1.03	1.094	1.048	0.948		1.001	1.04	1.006	1.109	1.071	1.03		0.97	0.0876684	0.59	-0.04	0.23	1.01	0.0513327	0.92	0.01	0.04	0.98	0.0767154	0.64	-0.03	0.19
506	116242792	P51532	SMCA4	Transcription activator BRG1	1647	184.5	7.88		1.125	1.016	0.986	1.032	1.116	0.979	1.068	1.027	1.005	1.027	1.009	1.013	1.01	0.928	0.961	0.951	1.006	0.881		1.042	1.042	1.033	1.017	0.966	0.946		1.1	0.367285	0.16	0.14	0.79	1.1	0.38659	0.15	0.14	0.82	1.09	0.513098	0.1	0.13	1
507	209572723	Q92922	SMRC1	SWI/SNF complex subunit SMARCC1	1105	122.8	5.76		0.925	1.159	1.142	1.183	0.627	1.175	1.006	1.155	1.079	1.021	0.932	1.013	0.984	0.974	0.983	0.999	0.971	0.995		1.075	0.995	1.08	0.989	0.98	0.988		1.09	0.193367	0.31	0.12	0.5	1.01	0.0501538	0.97	0.01	0.01	1.09	0.496647	0.1	0.13	0.98
508	74761670	Q9NRZ9	HELLS	Lymphoid-specific helicase	838	97	7.93		1.064	1.093	1.09	1.048	0.895	1.086	0.975	0.963	0.953	1.021	0.982	1.027	1.042	0.949	1.053	0.907	1.055	0.861		1.082	1.009	0.964	1.01	1.015	0.941		1.15	0.5958	0.08	0.2	1.12	1.07	0.123352	0.45	0.1	0.34	1.02	0.0663453	0.71	0.04	0.15
509	212276472	P51531	SMCA2	Probable global transcription activator SNF2L2	1590	181.2	7.2		0.983	0.984	1.034	1.001	1.071	0.998	1.014	1.006	0.975	1.008	0.912	0.875	0.891	0.93	0.948	1.01	1.001	1.166		1	1.024	0.998	0.932	0.923	1.059		0.94	0.170207	0.35	-0.08	0.45	0.97	0.0883764	0.58	-0.05	0.24	0.94	0.184619	0.33	-0.08	0.48
510	311033359	Q86WJ1	CHD1L	Chromodomain-helicase-DNA-binding protein 1-like	897	100.9	6.9		1.219	0.993	1.018	1.06	1.127	1.119	1.08	0.986	1.04	0.923	0.87	1.013	0.935	0.867	1.002	0.916	0.978	0.977		1.077	1.102	1.035	0.935	0.935	0.957		1.13	0.329277	0.18	0.17	0.74	1.15	0.991469	0.01	0.2	2.11	1.08	0.564221	0.08	0.11	1.08
511	57014128	O60264	SMCA5	SWI/SNF-related matrix-associated actin-dependent regulator of chromatin subfamily A member 5	1052	121.8	8.09		1.011	0.991	0.942	1	1.073	0.994	1.029	1.057	0.978	1.046	0.997	0.965	0.984	1.016	0.944	1.006	1.002	1.023		0.981	1.022	1.021	1.003	0.981	1.011		0.97	0.26163	0.24	-0.04	0.61	1.01	0.0688962	0.68	0.02	0.17	1.01	0.0685963	0.67	0.02	0.17
512	115311627	P28370	SMCA1	Probable global transcription activator SNF2L1	1054	122.5	8.09		0.96	1.026	0.956	1.036	0.989	1.015	0.983	0.983	0.95	1.076	0.964	0.981	0.951	0.95	0.989	1.059	1.024	1.089		0.981	1.013	0.972	1.007	0.963	1.057		0.93	0.661805	0.06	-0.11	1.22	0.96	0.426551	0.13	-0.06	0.88	0.92	0.938967	0.02	-0.12	1.77
513	57012959	Q8TAQ2	SMRC2	SWI/SNF complex subunit SMARCC2	1214	132.8	5.69		1.057	1.15	1.044	1.027	0.95	1.086	1.116	1.039	1.094	1.009	1.022	0.953	0.941	0.899	0.942	1.01	0.98	0.921		1.084	1.021	1.083	0.995	0.927	0.97		1.12	0.695767	0.05	0.16	1.26	1.05	0.176791	0.35	0.07	0.46	1.12	0.840322	0.03	0.16	1.5
514	238054318	Q96GM5	SMRD1	SWI/SNF-related matrix-associated actin-dependent regulator of chromatin subfamily D member 1	515	58.2	9.25		1.142	1.106	1.025	1.169	1.091	1.067	1.243	1.018	1.043	0.913	0.903	0.938	1.083	0.917	1.004	1.032	1.019	1.021		1.091	1.109	1.101	0.918	1.001	1.024		1.07	0.435594	0.13	0.09	0.9	1.08	0.710282	0.05	0.12	1.28	1.08	0.176944	0.34	0.11	0.47
515	116241283	Q92793	CBP	CREB-binding protein	2442	265.2	8.53		1.033	1.013	0.98	0.99	1.07	0.981	1.006	0.894	0.926	0.948	0.861	0.867	0.888	0.993	0.972	0.998	0.979	1.018		1.008	1.013	0.942	0.892	0.951	0.999		1.01	0.0737776	0.64	0.01	0.2	1.01	0.0726849	0.66	0.02	0.18	0.94	0.332094	0.18	-0.08	0.74
516	29840816	Q04724	TLE1	Transducin-like enhancer protein 1	770	83.1	7.24		1.069	0.983	0.974	1.044	1.041	1.016	1.107	0.938	0.938	1.069	1.161	1.053	1.045	1.111	1.064	1	1.024	1.084		1.009	1.034	0.994	1.094	1.073	1.036		0.97	0.101093	0.52	-0.04	0.28	1	0.0506065	0.94	0	0.03	0.96	0.100153	0.54	-0.06	0.27
517	62906893	Q9Y5V3	MAGD1	Melanoma-associated antigen D1	778	86.1	5.83		1.044	0.95	1.072	1	1.638	0.999	1.018	0.974	0.907	1.128	1.152	1.086	1.095	0.958	1.045	1.057	1.17	0.868		1.022	1.212	0.967	1.122	1.033	1.031		0.99	0.0509463	0.93	-0.01	0.03	1.18	0.116861	0.48	0.23	0.32	0.94	0.100242	0.53	-0.09	0.28
518	116242736	Q13308	PTK7	Inactive tyrosine-protein kinase 7	1070	118.3	7.09		0.972	0.955	0.993	1.047	0.853	1.035	0.985	1.003	0.986	1.054	0.953	0.93	0.926	1.012	0.969	0.995	0.995	0.976		0.973	0.978	0.991	0.979	0.969	0.988		0.98	0.202322	0.3	-0.02	0.52	0.99	0.0526797	0.88	-0.01	0.06	1	0.0629722	0.74	0	0.13
519	461854	P35222	CTNB1	Catenin beta-1	781	85.4	5.86		0.963	0.992	1.008	1.03	0.879	1.018	1.031	1.052	1.018	1.016	1.004	0.98	0.966	0.981	0.944	1.066	1.015	1.058		0.988	0.976	1.034	1	0.964	1.046		0.94	0.733157	0.05	-0.08	1.32	0.93	0.254771	0.24	-0.1	0.62	0.99	0.0945109	0.54	-0.02	0.27
520	14916543	O60716	CTND1	Catenin delta-1	968	108.1	6.23		1.001	0.985	1.027	1.014	0.934	0.966	0.984	1.004	0.972	1.046	1.016	1.006	0.974	0.994	0.959	0.973	0.984	0.935		1.005	0.971	0.987	1.022	0.976	0.964		1.04	0.509136	0.1	0.06	1	1.01	0.0568774	0.81	0.01	0.09	1.02	0.237146	0.26	0.03	0.58
521	461853	P35221	CTNA1	Catenin alpha-1	906	100	6.29		1.014	1.013	0.997	1.004	0.848	0.998	0.989	0.988	0.951	1.007	1.025	1	1.022	0.964	1.002	1.003	1.045	0.954		1.008	0.95	0.976	1.011	0.996	1.001		1.01	0.0572498	0.8	0.01	0.1	0.95	0.135685	0.43	-0.07	0.37	0.98	0.129979	0.45	-0.04	0.35
522	251757455	P11055	MYH3	Myosin-3	1940	223.8	5.81		1.292	1.08	1.083	0.939	0.979	1.238	1.201	1.231	1.064	1.224	0.944	0.855	0.641	0.642	0.771	0.695	0.633	0.698		1.152	1.052	1.165	1.008	0.685	0.675		1.71	0.999869	0	0.77	2.54	1.56	0.940833	0.02	0.64	1.76	1.73	1	0	0.79	3.04
523	21264498	P30520	PURA2	Adenylosuccinate synthetase isozyme 2	456	50.1	6.55		0.936	0.949	0.962	0.989	0.89	1.018	0.903	1.013	0.968	0.939	1.041	1.011	1.043	1.058	1.069	0.994	0.933	0.891		0.949	0.966	0.961	0.997	1.056	0.939		1.01	0.06125	0.78	0.01	0.11	1.03	0.0827304	0.62	0.04	0.21	1.02	0.0771662	0.65	0.03	0.19
524	322510049	Q9UKX3	MYH13	Myosin-13	1938	223.5	5.68		1.04	1.26	0.875	0.889	0.617	1.092	1.153	1.05	1.143	1.076	1.127	1.019	1.245	1.087	1.036	1.167	1.029	0.794		1.058	0.866	1.115	1.074	1.123	0.997		1.06	0.0664039	0.71	0.09	0.15	0.87	0.110289	0.5	-0.2	0.3	1.12	0.167205	0.36	0.16	0.45
525	81175161	P55283	CADH4	Cadherin-4	916	100.2	4.82		1.131	1.104	1.041	1.156	1.205	1.062	1.058	1.158	1.078	1.138	1.123	1.106	1.073	1.036	1.071	1.056	0.947	1.023		1.092	1.141	1.098	1.123	1.06	1.009		1.08	0.456513	0.12	0.11	0.93	1.13	0.633939	0.07	0.18	1.18	1.09	0.463622	0.12	0.12	0.94
526	1705552	P55290	CAD13	Cadherin-13	713	78.2	4.98		0.919	0.973	0.901	0.934	0.91	0.932	1.028	0.947	0.914	0.97	0.95	0.933	0.977	1.141	1.014	1.066	1.01	1.217		0.931	0.925	0.963	0.951	1.044	1.098		0.85	0.652213	0.06	-0.24	1.19	0.84	0.722004	0.05	-0.25	1.29	0.88	0.432698	0.13	-0.19	0.89
527	296434420	Q9ULB5	CADH7	Cadherin-7	785	87	4.81		0.803	0.79	0.805	0.821	0.465	0.987	0.858	1.118	0.857	0.913	0.842	1.023	0.903	1.281	0.941	1.215	0.835	1.699		0.799	0.758	0.944	0.926	1.042	1.25		0.64	0.393702	0.15	-0.64	0.84	0.61	0.350118	0.17	-0.72	0.77	0.76	0.195602	0.31	-0.4	0.5
528	116241277	P19022	CADH2	Cadherin-2	906	99.7	4.81		1.083	1.01	1.006	0.996	1.172	1.023	1.062	1.047	1.008	1.023	1.016	0.991	1.023	0.941	0.977	1.09	1.035	1.001		1.033	1.064	1.039	1.01	0.98	1.042		0.99	0.0566595	0.82	-0.01	0.08	1.02	0.0641246	0.74	0.03	0.13	1	0.0510299	0.93	0	0.03
529	3041682	P29992	GNA11	Guanine nucleotide-binding protein subunit alpha-11	359	42.1	5.69		1.038	1.013	1.029	1.048	0.777	1.039	1.009	1.05	1.026	1.048	1.012	0.994	1.102	0.871	1.07	0.964	1.118	0.755		1.027	0.954	1.028	1.018	1.014	0.946		1.09	0.11387	0.48	0.12	0.31	1.01	0.0503596	0.95	0.01	0.02	1.09	0.114954	0.48	0.12	0.32
530	121011	P16520	GBB3	Guanine nucleotide-binding protein G(I)/G(S)/G(T) subunit beta-3	340	37.2	5.67		1.211	1.164	1.098	1.101	0.934	1.067	1.138	1.068	1.079	1.149	1.039	1.058	0.987	0.953	0.952	1.036	1.144	0.952		1.158	1.034	1.095	1.082	0.964	1.044		1.11	0.381125	0.15	0.15	0.82	0.99	0.0518754	0.9	-0.01	0.05	1.05	0.129248	0.44	0.07	0.35
531	51317302	P62873	GBB1	Guanine nucleotide-binding protein G(I)/G(S)/G(T) subunit beta-1	340	37.4	6		1.062	1.045	0.985	0.991	1.248	0.996	1.07	1.053	1.026	1.064	1.033	0.996	0.992	0.903	0.994	0.979	1.077	0.82		1.031	1.078	1.05	1.031	0.963	0.959		1.08	0.141525	0.41	0.1	0.39	1.12	0.170379	0.35	0.17	0.46	1.09	0.206268	0.3	0.13	0.53
532	22256759	Q9HAV0	GBB4	Guanine nucleotide-binding protein subunit beta-4	340	37.5	6		0.988	1.057	0.937	1.023	0.72	0.961	0.945	0.937	1.007	1.153	1.059	1.028	1.051	1.04	1.112	1.068	1.142	0.893		0.994	0.901	0.963	1.08	1.068	1.034		0.96	0.0757973	0.65	-0.06	0.19	0.87	0.187708	0.32	-0.2	0.49	0.93	0.142205	0.41	-0.1	0.39
533	51317304	P62879	GBB2	Guanine nucleotide-binding protein G(I)/G(S)/G(T) subunit beta-2	340	37.3	6		1.02	1.028	1.009	0.994	0.776	0.958	0.985	0.971	0.94	0.976	0.972	1.014	0.946	0.815	1	0.906	0.979	0.871		1.019	0.909	0.965	0.987	0.92	0.919		1.11	0.80625	0.04	0.15	1.44	0.99	0.0519158	0.91	-0.01	0.04	1.05	0.243492	0.25	0.07	0.6
534	12229817	Q9UBI6	GBG12	Guanine nucleotide-binding protein G(I)/G(S)/G(O) subunit gamma-12	72	8	8.97		0.991	0.999	0.995	1.03	0.963	0.956	1.07	0.98	0.986	1.074	1.024	1.053	1.005	0.957	1.013	1.04	1.046	1.05		0.995	0.983	1.012	1.05	0.992	1.045		0.95	1	0	-0.07	3.77	0.94	0.671025	0.06	-0.09	1.22	0.97	0.189146	0.32	-0.05	0.49
535	6016106	O60262	GBG7	Guanine nucleotide-binding protein G(I)/G(S)/G(O) subunit gamma-7	68	7.5	8.51		1.061	0.976	0.991	0.943	0.826	1.006	0.922	1.044	0.982	1.164	1.023	1.124	0.942	1.081	1.038	1.001	1.014	1.008		1.009	0.925	0.983	1.104	1.02	1.007		1	0.0506087	0.94	0	0.03	0.92	0.309324	0.19	-0.12	0.71	0.98	0.0995647	0.53	-0.04	0.28
536	3041681	P17813	EGLN	Endoglin	658	70.5	6.61		0.928	1.031	1.105	1.018	0.862	1.038	0.902	1.037	0.927	0.984	0.887	0.867	0.881	0.959	0.956	0.908	0.918	0.972		1.021	0.973	0.955	0.913	0.932	0.933		1.09	0.32478	0.18	0.13	0.74	1.04	0.0994881	0.54	0.06	0.27	1.02	0.0745672	0.65	0.03	0.18
537	10720303	Q15750	TAB1	TGF-beta-activated kinase 1 and MAP3K7-binding protein 1	504	54.6	5.52		1.126	1.079	1.064	1.05	1.098	1.088	1.057	1.005	1.046	0.921	0.966	0.983	1.008	0.932	0.962	0.841	0.91	0.816		1.09	1.078	1.036	0.957	0.967	0.855		1.27	0.999969	0	0.35	2.65	1.26	0.999976	0	0.33	2.67	1.21	0.998351	0	0.28	2.31
538	74753070	Q9NYJ8	TAB2	TGF-beta-activated kinase 1 and MAP3K7-binding protein 2	693	76.4	8.54		1.38	1.306	0.818	1.513	1.362	0.766	1.089	0.857	0.931	1.068	1.065	0.98	0.985	0.763	0.981	0.925	0.939	0.703		1.168	1.214	0.959	1.038	0.91	0.856		1.37	0.332894	0.18	0.45	0.75	1.42	0.289613	0.21	0.5	0.68	1.12	0.159671	0.37	0.16	0.43
539	296453075	Q7Z3T8	ZFY16	Zinc finger FYVE domain-containing protein 16	1539	168.8	4.82		1.051	0.955	1.096	1.035	1.097	1.031	1.014	0.903	1.015	1.188	1.062	1.099	1.15	1.117	1.097	1.052	1.036	1.021		1.034	1.054	0.977	1.116	1.121	1.036		1	0.0502356	0.97	0	0.01	1.02	0.115373	0.47	0.03	0.33	0.94	0.306856	0.2	-0.08	0.7
540	2498193	Q15582	BGH3	Transforming growth factor-beta-induced protein ig-h3	683	74.6	7.71		0.905	0.877	1.079	1.063	0.62	1.069	0.9	1.034	0.911	0.993	1.05	0.887	0.832	1.067	0.889	1.101	0.947	1.266		0.953	0.917	0.949	0.977	0.929	1.105		0.86	0.251197	0.25	-0.21	0.61	0.83	0.175816	0.34	-0.27	0.46	0.86	0.304226	0.2	-0.22	0.7
541	47606458	P61586	RHOA	Transforming protein RhoA	193	21.8	6.1		1.112	0.996	1.055	0.968	1.039	0.929	1.051	0.971	1.036	1.038	1.102	1.037	1.056	0.956	1.044	0.903	0.978	0.88		1.054	0.979	1.02	1.059	1.019	0.92		1.15	0.782217	0.04	0.2	1.39	1.06	0.247834	0.25	0.09	0.6	1.11	0.668522	0.06	0.15	1.21
542	17865624	Q9HAU4	SMUF2	E3 ubiquitin-protein ligase SMURF2	748	86.1	7.96		0.943	0.99	0.986	0.947	0.988	1.058	1.036	1.074	0.952	1.097	0.964	1.029	0.973	0.991	1.091	1.075	1.014	0.976		0.973	0.998	1.021	1.03	1.019	1.021		0.95	0.285691	0.21	-0.07	0.67	0.98	0.0802204	0.61	-0.03	0.21	1	0.05	0.99	0	0.01
543	85700366	P45984	MK09	Mitogen-activated protein kinase 9	424	48.1	5.63		0.908	0.931	1.148	1.022	0.767	1.081	1.084	1.011	1.054	0.966	0.937	0.964	1.002	1.172	1.001	1.195	0.961	1.282		0.996	0.956	1.049	0.956	1.058	1.146		0.87	0.212991	0.29	-0.2	0.54	0.83	0.262112	0.24	-0.26	0.63	0.92	0.156211	0.38	-0.13	0.42
544	12643557	O43318	M3K7	Mitogen-activated protein kinase kinase kinase 7	606	67.2	7.11		1.078	1.04	1.1	0.965	1.58	1.016	1.035	0.916	0.986	1.06	1.182	1.168	1.151	1.004	1.126	0.961	1.049	0.904		1.073	1.187	0.979	1.137	1.094	0.971		1.1	0.54513	0.09	0.14	1.04	1.22	0.175101	0.34	0.29	0.46	1.01	0.0522966	0.89	0.01	0.05
545	23503054	P26885	FKBP2	Peptidyl-prolyl cis-trans isomerase FKBP2	142	15.6	9.13		1.038	1.076	0.978	1.195	1.041	1.038	1.045	1.075	1.112	1.056	1.009	1.003	0.961	0.9	0.976	0.964	1.005	0.947		1.031	1.091	1.077	1.023	0.946	0.972		1.06	0.382412	0.15	0.08	0.81	1.12	0.525867	0.09	0.17	1.02	1.11	0.952309	0.01	0.15	1.83
546	13959566	Q99717	SMAD5	Mothers against decapentaplegic homolog 5	465	52.2	7.71		0.922	1.004	0.959	0.894	0.961	1.014	0.997	0.954	1.074	1.001	0.986	0.997	0.926	0.842	1.001	0.915	0.95	0.878		0.962	0.956	1.008	0.995	0.923	0.914		1.05	0.3002	0.21	0.07	0.69	1.05	0.16725	0.36	0.06	0.45	1.1	0.569814	0.08	0.14	1.08
547	117949389	Q6YHK3	CD109	CD109 antigen	1445	161.6	5.85		0.96	1.002	0.973	0.981	0.884	0.976	0.88	0.941	0.931	1.115	0.995	0.948	0.968	0.99	0.972	1.093	0.971	1.077		0.979	0.947	0.917	1.02	0.977	1.047		0.93	0.354873	0.17	-0.1	0.78	0.9	0.468428	0.11	-0.14	0.94	0.88	0.793851	0.04	-0.19	1.42
548	150416155	O43294	TGFI1	Transforming growth factor beta-1-induced transcript 1 protein	461	49.8	7.03		1.267	0.942	1.198	1.217	1.369	1.056	0.986	1.224	1.158	1.038	1.139	1.051	1.099	1.007	1.101	0.988	1.064	0.952		1.136	1.214	1.122	1.076	1.069	1.002		1.13	0.229863	0.27	0.18	0.57	1.21	0.534673	0.09	0.28	1.04	1.12	0.303795	0.2	0.16	0.71
549	223590203	Q09472	EP300	Histone acetyltransferase p300	2414	264	8.5		0.852	0.912	1.112	1.039	0.678	1.012	1.113	0.977	0.922	1.171	1.058	1.01	1.091	1.059	1.087	1.098	1.083	0.951		0.958	0.91	1.004	1.08	1.079	1.044		0.92	0.146163	0.4	-0.12	0.4	0.87	0.174853	0.34	-0.2	0.46	0.96	0.0818415	0.61	-0.06	0.21
550	48428655	Q8TAD8	SNIP1	Smad nuclear-interacting protein 1	396	45.8	9.99		1.076	1.045	0.929	0.917	1.818	0.886	0.972	0.942	0.878	0.653	0.789	0.76	0.833	0.725	1.008	0.807	0.81	1.021		1.017	1.207	0.931	0.734	0.855	0.879		1.16	0.340636	0.18	0.21	0.76	1.37	0.16898	0.35	0.46	0.45	1.06	0.100455	0.53	0.08	0.27
551	317373353	Q8IZD4	DCP1B	mRNA-decapping enzyme 1B	617	67.7	8.56		0.947	0.869	0.925	0.957	1.227	0.774	0.919	0.852	0.933	1.073	1.129	1.069	1.044	0.934	1.021	0.821	1.033	0.849		0.914	0.986	0.901	1.09	0.999	0.901		1.01	0.0536341	0.86	0.02	0.06	1.09	0.0857831	0.59	0.13	0.23	1	0.05	1	0	0
552	120484	P15407	FOSL1	Fos-related antigen 1	271	29.4	8.02		0.909	1.105	0.936	1.004	0.789	0.972	1.071	1.015	1	1.002	0.997	0.949	0.984	1.002	1.043	0.938	0.928	0.979		0.983	0.921	1.029	0.983	1.01	0.948		1.04	0.0828998	0.61	0.05	0.21	0.97	0.0665092	0.71	-0.04	0.15	1.08	0.792362	0.04	0.12	1.41
553	12643897	Q9ULC3	RAB23	Ras-related protein Rab-23	237	26.6	6.6		1.212	1.071	1.127	1.038	1.466	0.983	1.076	1.091	1.065	1.071	1.047	0.984	1.002	0.947	0.941	1.009	1.009	0.912		1.137	1.162	1.078	1.034	0.963	0.977		1.16	0.79852	0.04	0.22	1.43	1.19	0.203084	0.3	0.25	0.52	1.1	0.793046	0.04	0.14	1.42
554	20137621	O95071	UBR5	E3 ubiquitin-protein ligase UBR5	2799	309.2	5.85		0.992	1.069	0.999	1.012	1.162	1.06	1.016	0.989	0.985	0.973	0.988	0.984	0.954	0.922	0.959	0.93	0.972	0.91		1.02	1.078	0.997	0.981	0.945	0.937		1.09	0.702129	0.05	0.12	1.27	1.15	0.768824	0.04	0.2	1.37	1.06	0.755979	0.04	0.09	1.35
555	125210	P22694	KAPCB	cAMP-dependent protein kinase catalytic subunit beta	351	40.6	8.78		1.027	1.09	1.073	1.074	1.011	1.172	1.093	1.056	1.07	0.997	0.973	0.89	0.936	1.021	0.964	0.896	0.935	0.981		1.063	1.086	1.073	0.953	0.973	0.937		1.13	0.95399	0.02	0.18	1.82	1.16	0.733462	0.05	0.21	1.31	1.15	0.993825	0.01	0.2	2.15
556	125193	P10644	KAP0	cAMP-dependent protein kinase type I-alpha regulatory subunit	381	43	5.35		0.973	0.938	0.998	0.986	0.964	1.004	0.945	0.965	0.985	1.071	1.033	1.044	0.998	1.058	1.035	1.016	1.052	0.967		0.97	0.985	0.965	1.049	1.03	1.012		0.96	0.260513	0.24	-0.06	0.63	0.97	0.157081	0.38	-0.04	0.43	0.95	0.367666	0.16	-0.07	0.8
557	125198	P13861	KAP2	cAMP-dependent protein kinase type II-alpha regulatory subunit	404	45.5	5.07		1.071	1.035	1.021	0.996	1.152	1.005	1.063	0.997	1.004	0.997	0.981	1.061	1.003	0.991	1.016	0.986	0.975	0.999		1.043	1.051	1.021	1.013	1.003	0.986		1.06	0.881142	0.03	0.08	1.56	1.07	0.226511	0.27	0.09	0.56	1.04	0.321003	0.19	0.05	0.72
558	143811429	Q04721	NOTC2	Neurogenic locus notch homolog protein 2	2471	265.2	5.14		1.021	0.98	0.999	1.036	1.03	0.952	0.986	0.921	0.953	1.061	1.038	0.98	0.958	0.971	0.975	1.053	1.002	0.907		1	1.006	0.953	1.026	0.968	0.987		1.01	0.0591647	0.79	0.02	0.1	1.02	0.0650829	0.73	0.03	0.14	0.97	0.107271	0.51	-0.05	0.3
559	12231037	Q92542	NICA	Nicastrin	709	78.4	5.99		0.873	0.994	0.998	0.989	0.665	1.051	1.07	0.986	1.01	0.991	0.981	0.987	0.83	1.275	1.021	1.165	0.961	1.19		0.955	0.902	1.022	0.986	1.042	1.105		0.86	0.392561	0.15	-0.21	0.84	0.82	0.277941	0.22	-0.29	0.66	0.92	0.177489	0.34	-0.11	0.47
560	24211441	Q13443	ADAM9	Disintegrin and metalloproteinase domain-containing protein 9	819	90.5	7.52		1.026	0.991	0.97	1.007	1.084	1.017	1.031	0.985	0.983	1.031	0.974	0.979	0.999	0.899	0.986	0.95	1.041	0.817		0.996	1.036	0.999	0.995	0.961	0.936		1.06	0.136918	0.42	0.09	0.38	1.11	0.275066	0.22	0.15	0.65	1.07	0.14637	0.39	0.1	0.4
561	29337031	O14672	ADA10	Disintegrin and metalloproteinase domain-containing protein 10	748	84.1	7.77		1.142	1.015	1.052	1.018	0.996	1.007	1.069	0.941	1.025	0.99	1.005	0.999	1.007	0.927	0.977	0.964	0.983	0.913		1.069	1.007	1.011	0.998	0.97	0.953		1.12	0.69627	0.05	0.17	1.26	1.06	0.626816	0.07	0.08	1.16	1.06	0.24798	0.24	0.09	0.61
562	14423632	P78536	ADA17	Disintegrin and metalloproteinase domain-containing protein 17	824	93	5.76		0.961	0.995	0.885	0.945	0.963	0.909	1.01	0.91	0.925	1.051	0.914	0.898	0.943	0.951	0.886	1.033	0.89	1.027		0.947	0.939	0.948	0.955	0.927	0.984		0.96	0.0956039	0.56	-0.05	0.26	0.95	0.140412	0.42	-0.07	0.38	0.96	0.0943651	0.56	-0.05	0.25
563	68067880	Q86UW9	DTX2	Probable E3 ubiquitin-protein ligase DTX2	622	67.2	8.47		1.136	1.147	1.046	1.077	1.322	1.005	1.091	0.995	0.971	1.034	0.855	0.863	0.926	0.857	0.848	0.858	0.927	0.709		1.11	1.135	1.019	0.917	0.877	0.832		1.33	0.935299	0.02	0.42	1.74	1.36	0.675477	0.06	0.45	1.23	1.23	0.64436	0.06	0.29	1.19
564	14195675	P49757	NUMB	Protein numb homolog	651	70.8	8.51		1.04	1.038	1.029	1.009	1.084	1.013	1.044	0.987	0.995	0.982	0.948	0.928	0.903	0.953	0.946	1.005	0.925	1.062		1.036	1.035	1.009	0.953	0.934	0.997		1.04	0.154019	0.38	0.05	0.41	1.04	0.12204	0.46	0.05	0.34	1.01	0.058112	0.81	0.02	0.09
565	338817983	Q06330	SUH	Recombining binding protein suppressor of hairless	500	55.6	7.18		0.889	0.897	0.96	0.911	0.761	0.95	0.925	1.04	0.989	1.028	1.087	1.031	1.066	0.889	1.002	0.946	1.104	0.77		0.915	0.874	0.985	1.049	0.986	0.94		0.97	0.0568031	0.81	-0.04	0.09	0.93	0.0871504	0.59	-0.11	0.23	1.05	0.0708534	0.69	0.07	0.16
566	296435513	Q8IZL2	MAML2	Mastermind-like protein 2	1156	125.1	9.42		0.744	0.865	0.921	0.862	1.281	0.839	1.122	0.965	0.934	0.718	0.699	0.82	0.842	1.093	0.824	0.935	0.851	1.396		0.843	0.994	1.007	0.746	0.92	1.061		0.79	0.214657	0.29	-0.33	0.54	0.94	0.0597242	0.78	-0.09	0.11	0.95	0.0597126	0.78	-0.08	0.11
567	2500813	Q13573	SNW1	SNW domain-containing protein 1	536	61.5	9.52		1.037	1.031	1.038	1.03	1.066	1.021	1.023	1.052	1.023	1.029	1.005	0.99	0.965	0.915	0.97	0.99	1.01	0.882		1.035	1.039	1.033	1.008	0.95	0.961		1.08	0.412836	0.13	0.11	0.87	1.08	0.411328	0.14	0.11	0.87	1.08	0.378649	0.15	0.1	0.82
568	226713806	Q9Y618	NCOR2	Nuclear receptor corepressor 2	2525	274.6	7.59		0.973	1.047	1.053	1	0.988	0.999	0.945	0.951	0.943	1.038	1.098	1.062	1.035	0.99	1.027	1.104	1.128	1.05		1.024	0.996	0.946	1.066	1.017	1.094		0.94	0.471851	0.11	-0.1	0.95	0.91	0.962755	0.01	-0.14	1.88	0.86	0.999808	0	-0.21	2.51
569	3182976	P56545	CTBP2	C-terminal-binding protein 2	445	48.9	6.95		0.979	1.047	1.036	1.03	0.852	1.009	1.011	0.939	0.985	1.163	1.145	1.051	1.05	1.064	1.038	0.932	1.086	0.998		1.02	0.964	0.978	1.12	1.051	1.005		1.01	0.0598804	0.78	0.02	0.11	0.96	0.085169	0.59	-0.06	0.23	0.97	0.0822242	0.61	-0.04	0.21
570	6014741	Q13363	CTBP1	C-terminal-binding protein 1	440	47.5	6.77		1.026	0.938	1.032	1.091	1.037	0.995	1.103	1.028	1.055	0.998	1.041	1.152	1.077	0.853	0.957	1.012	1.094	1.017		0.999	1.041	1.062	1.064	0.962	1.041		0.96	0.167983	0.35	-0.06	0.45	1	0.05	1	0	0	1.02	0.090084	0.58	0.03	0.24
571	23396787	Q9H488	OFUT1	GDP-fucose protein O-fucosyltransferase 1	388	43.9	8.53		0.884	0.985	0.898	1.056	0.741	1.048	1.076	1.135	1.088	0.941	0.954	0.931	0.982	1.086	0.988	1.092	0.961	1.142		0.922	0.948	1.1	0.942	1.019	1.065		0.87	0.563768	0.08	-0.21	1.08	0.89	0.158988	0.37	-0.17	0.43	1.03	0.0907858	0.58	0.05	0.24
572	296439504	P02452	CO1A1	Collagen alpha-1(I) chain	1464	138.9	5.8		1.047	1.03	0.978	1.058	1.073	1.052	0.807	0.802	0.753	1.063	1.058	1.018	1.055	1	1.02	1.102	1.124	0.987		1.018	1.061	0.787	1.046	1.025	1.071		0.95	0.186882	0.33	-0.07	0.49	0.99	0.0557907	0.83	-0.01	0.08	0.73	0.999668	0	-0.44	2.46
573	124056490	P02461	CO3A1	Collagen alpha-1(III) chain	1466	138.5	6.61		1.018	0.958	0.878	1.054	1.007	0.984	0.912	0.852	0.819	1.083	1.015	1.025	1.099	1.026	1.114	1.115	1.188	0.972		0.951	1.015	0.861	1.041	1.08	1.092		0.87	0.417787	0.13	-0.2	0.87	0.93	0.195177	0.31	-0.11	0.5	0.79	0.859122	0.03	-0.34	1.54
574	125987809	P02462	CO4A1	Collagen alpha-1(IV) chain	1669	160.5	8.28		1.08	1.03	1.032	0.923	1.128	0.986	1.046	0.917	0.971	1.004	1.023	1.004	1.007	1.001	1.007	1.004	1.061	1.001		1.047	1.012	0.978	1.01	1.005	1.022		1.02	0.154882	0.38	0.04	0.42	0.99	0.0526287	0.89	-0.01	0.05	0.96	0.168392	0.36	-0.06	0.45
575	125987811	P12109	CO6A1	Collagen alpha-1(VI) chain	1028	108.5	5.43		1.01	1.04	0.992	0.989	0.872	0.993	0.985	0.986	0.994	0.995	0.972	0.966	0.982	0.983	0.96	1.043	0.997	1.025		1.014	0.951	0.989	0.978	0.975	1.022		0.99	0.0682809	0.7	-0.01	0.15	0.93	0.356749	0.17	-0.1	0.77	0.97	0.6066	0.07	-0.05	1.16
576	296439507	P08123	CO1A2	Collagen alpha-2(I) chain	1366	129.2	8.95		1.092	1.042	0.972	1.045	1.086	1.041	0.874	0.882	0.829	1.096	1.057	1.033	1.051	0.991	1.047	1.119	1.127	0.981		1.035	1.057	0.861	1.062	1.029	1.076		0.96	0.102526	0.53	-0.05	0.27	0.98	0.0657598	0.73	-0.02	0.14	0.8	0.968626	0.01	-0.32	1.89
577	125987812	P12110	CO6A2	Collagen alpha-2(VI) chain	1019	108.5	6.21		0.961	1.058	0.945	1.037	0.911	0.984	0.935	0.924	0.938	1.019	1.006	0.992	1.013	0.949	1.013	1.046	0.993	0.912		0.988	0.977	0.932	1.006	0.992	0.984		1	0.0506167	0.94	0.01	0.03	0.99	0.0518314	0.91	-0.01	0.04	0.95	0.241387	0.26	-0.08	0.58
578	311033499	P12111	CO6A3	Collagen alpha-3(VI) chain	3177	343.5	6.68		1.015	1.048	1.013	1.027	0.918	1.015	0.985	1.001	0.959	1.007	0.96	0.975	0.967	0.962	0.941	1.038	0.993	1.052		1.025	0.987	0.981	0.981	0.957	1.028		1	0.0521535	0.91	0	0.04	0.96	0.171392	0.35	-0.06	0.46	0.95	0.524952	0.1	-0.07	1.01
579	74723551	Q86Y22	CONA1	Collagen alpha-1(XXIII) chain	540	51.9	7.25		1.184	1.249	1.492	1.289	1.206	1.08	0.805	0.826	0.761	0.999	0.952	0.938	0.923	0.92	0.936	0.963	0.942	0.91		1.308	1.191	0.798	0.963	0.926	0.938		1.39	0.937964	0.02	0.48	1.75	1.27	0.951075	0.02	0.34	1.81	0.85	0.998676	0	-0.23	2.34
580	85687376	P20908	CO5A1	Collagen alpha-1(V) chain	1838	183.4	5.06		1.014	1.038	0.979	0.975	1.036	0.965	1.014	0.97	0.94	1.068	1.015	1.024	1.011	0.976	0.977	1.023	1.036	1.02		1.01	0.992	0.975	1.035	0.988	1.027		0.98	0.148932	0.41	-0.02	0.38	0.97	0.305852	0.2	-0.05	0.69	0.95	0.588682	0.08	-0.07	1.11
581	143811378	P05997	CO5A2	Collagen alpha-2(V) chain	1499	144.8	6.46		1.103	1.022	0.967	0.971	1.356	0.956	1.021	0.968	0.971	1.029	0.981	0.994	0.911	0.923	0.956	0.995	1.083	0.91		1.03	1.095	0.986	1.001	0.93	0.996		1.03	0.0806503	0.62	0.05	0.21	1.1	0.103945	0.52	0.14	0.28	0.99	0.0538237	0.86	-0.01	0.07
582	146345397	Q99715	COCA1	Collagen alpha-1(XII) chain	3063	332.9	5.53		1.045	1.014	0.955	1.024	1.098	1.017	1.076	1.043	1.056	0.992	0.974	0.971	0.959	0.922	0.96	0.97	1.026	0.921		1.005	1.046	1.058	0.979	0.947	0.972		1.03	0.122999	0.46	0.05	0.33	1.08	0.411543	0.14	0.11	0.86	1.09	0.700083	0.05	0.12	1.27
583	317373377	P07942	LAMB1	Laminin subunit beta-1	1786	197.9	4.94		1.061	1.045	1.023	1.018	0.906	1.036	0.998	1.007	0.983	0.998	0.979	0.978	0.985	0.914	0.959	0.97	0.974	0.936		1.043	0.987	0.996	0.985	0.953	0.96		1.09	0.994013	0.01	0.12	2.16	1.03	0.0936902	0.56	0.04	0.25	1.04	0.662652	0.06	0.05	1.21
584	224471885	P11047	LAMC1	Laminin subunit gamma-1	1609	177.5	5.12		1.069	1.087	1.036	1.013	0.997	1.032	1.019	1.005	1.001	1.017	0.994	0.977	1.004	1.039	1.003	1.036	1.053	0.974		1.064	1.014	1.008	0.996	1.015	1.021		1.04	0.299763	0.2	0.06	0.7	0.99	0.0577115	0.81	-0.01	0.09	0.99	0.0799687	0.64	-0.02	0.19
585	308153586	Q9Y6N6	LAMC3	Laminin subunit gamma-3	1575	171.1	6.58		0.875	1.024	1.078	0.882	1.351	0.898	0.917	0.967	0.679	0	1.144	1.411	0.989	1.186	0.964	1.47	1.258	1.605		0.993	1.044	0.854	0.851	1.046	1.444		0.69	0.93076	0.02	-0.54	1.73	0.72	0.524493	0.1	-0.47	1.02	0.59	0.974096	0.01	-0.76	1.93
586	205371751	Q9Y6C2	EMIL1	EMILIN-1	1016	106.6	5.15		1.078	0.99	0.875	1.063	1.148	1.069	0.895	1.011	1.042	0.939	0.931	0.994	0.961	0.973	0.948	1.056	0.927	1.007		0.981	1.093	0.983	0.954	0.96	0.997		0.98	0.0556133	0.83	-0.02	0.08	1.1	0.485295	0.11	0.13	0.98	0.99	0.0561271	0.82	-0.02	0.08
587	476007832	Q86XX4	FRAS1	Extracellular matrix protein FRAS1	4008	442.9	5.57		1.055	1.004	1.041	0.937	0.683	1.006	0.96	0.896	0.992	1.061	1.251	1.341	1.223	1.316	1.363	1.152	1.156	1.436		1.033	0.875	0.949	1.218	1.301	1.248		0.83	0.553643	0.09	-0.27	1.06	0.7	0.712201	0.05	-0.51	1.28	0.76	0.794051	0.04	-0.39	1.41
588	311033452	P35555	FBN1	Fibrillin-1	2871	312	4.93		1.136	1.151	1.115	1.092	1.192	1.009	1.111	1.002	1.049	0.941	0.921	0.975	0.913	0.851	0.98	0.87	0.948	0.798		1.134	1.098	1.054	0.946	0.914	0.872		1.3	0.999194	0	0.38	2.38	1.26	0.851207	0.03	0.33	1.53	1.21	0.868291	0.03	0.27	1.57
589	300669710	P02751	FINC	Fibronectin	2386	262.5	5.71		1.031	1.067	1.003	1.004	0.999	1.014	0.895	0.895	0.875	1.056	1.025	1.019	0.983	1.016	1.011	1.102	1.093	1.086		1.034	1.006	0.888	1.033	1.004	1.094		0.95	0.816689	0.03	-0.08	1.46	0.92	1	0	-0.12	3.77	0.81	1	0	-0.3	4.85
590	117949802	P07996	TSP1	Thrombospondin-1	1170	129.3	4.94		1.097	1.127	1.112	1.094	0.937	1.146	0.938	0.903	0.953	1.028	1.004	0.986	0.992	0.994	1.016	1.149	1.096	1.092		1.112	1.059	0.931	1.006	1.001	1.113		1	0.0502583	0.98	0	0.01	0.95	0.123787	0.46	-0.07	0.34	0.84	0.999998	0	-0.26	2.83
591	215273908	P35442	TSP2	Thrombospondin-2	1172	129.9	4.83		1.165	1.151	1.049	1.092	1.383	1.059	0.925	0.842	0.863	1.026	0.951	1.003	0.981	1.022	0.991	0.99	0.975	1.001		1.122	1.178	0.877	0.993	0.998	0.989		1.13	0.896104	0.02	0.18	1.62	1.19	0.403249	0.14	0.25	0.85	0.89	0.969663	0.01	-0.17	1.91
592	215274249	P23142	FBLN1	Fibulin-1	703	77.2	5.22		0.835	0.822	0.851	0.975	0.696	0.958	0.701	0.802	0.772	1.128	0.994	1.016	1.052	1.138	1.177	1.316	1.069	1.505		0.836	0.876	0.758	1.046	1.122	1.297		0.64	0.907842	0.02	-0.63	1.66	0.68	0.702922	0.05	-0.57	1.27	0.58	0.960236	0.01	-0.77	1.85
593	224471827	P98095	FBLN2	Fibulin-2	1184	126.5	4.82		0.995	0.936	0.936	1.058	0.856	0.919	0.954	0.976	0.921	1.066	0.966	1.048	0.989	0.963	0.96	1.19	1.026	0.977		0.956	0.944	0.95	1.027	0.971	1.065		0.9	0.331233	0.18	-0.16	0.74	0.89	0.256242	0.24	-0.17	0.61	0.89	0.36949	0.16	-0.16	0.8
594	205831094	P55081	MFAP1	Microfibrillar-associated protein 1	439	51.9	4.98		1.024	1.002	0.91	0.928	1.096	0.909	1.065	1.007	0.975	0.955	1.043	0.927	0.936	0.956	0.959	1.008	1.04	0.833		0.979	0.978	1.016	0.975	0.95	0.96		1.02	0.0571952	0.81	0.03	0.09	1.02	0.0545074	0.85	0.03	0.07	1.06	0.120307	0.47	0.08	0.33
595	129283	P09486	SPRC	SPARC	303	34.6	4.84		0.996	0.965	0.968	0.978	0.818	0.981	0.915	0.98	0.876	1.096	1.038	0.985	0.99	0.968	1.011	1.072	1.083	0.93		0.976	0.926	0.924	1.04	0.99	1.029		0.95	0.171116	0.36	-0.08	0.45	0.9	0.266073	0.23	-0.15	0.64	0.9	0.397589	0.15	-0.16	0.84
596	281185495	P24821	TENA	Tenascin	2201	240.7	4.89		1.155	1.144	1.03	0.964	1.191	0.907	1.03	1.019	1.044	1.15	1.029	0.991	0.949	1.032	0.961	1.026	1.063	1.029		1.11	1.02	1.031	1.057	0.981	1.039		1.07	0.359429	0.17	0.09	0.78	0.98	0.055026	0.84	-0.03	0.08	0.99	0.0856704	0.59	-0.01	0.23
597	460018339	O00468	AGRIN	Agrin	2067	217.1	6.39		1.028	0.997	0.932	1.155	1.382	0.928	1.002	0.839	0.936	1.028	0.985	0.99	0.936	0.898	0.983	1.038	1.045	0.951		0.986	1.155	0.926	1.001	0.939	1.012		0.97	0.0925093	0.56	-0.04	0.25	1.14	0.173069	0.35	0.19	0.46	0.92	0.302988	0.2	-0.13	0.7
598	139653	P04004	VTNC	Vitronectin	478	54.3	5.8		1.032	1.043	0.921	1.064	0.782	1.095	1.347	1.307	1.207	1.27	1.004	1.014	0.994	0.994	0.992	1.035	0.913	0.81		0.998	0.98	1.287	1.096	0.993	0.919		1.09	0.16821	0.35	0.12	0.45	1.07	0.0782663	0.64	0.09	0.2	1.4	0.987952	0.01	0.49	2.06
599	116241320	P29279	CTGF	Connective tissue growth factor	349	38.1	8		1.113	1.032	1.103	0.945	1.052	0.967	1.014	0.988	0.969	1.023	1.053	0.997	0.965	0.932	0.906	1.005	0.86	1.035		1.083	0.988	0.99	1.024	0.934	0.967		1.12	0.441973	0.12	0.16	0.91	1.02	0.0618386	0.75	0.03	0.12	1.02	0.0683462	0.7	0.03	0.16
600	3023601	O00622	CYR61	Protein CYR61	381	42	8.21		1.039	0.987	0.953	0.889	0.938	0.889	1.322	1.093	1.114	1.238	1.01	1.018	0.915	0.837	0.901	0.93	0.925	0.849		0.993	0.905	1.176	1.089	0.884	0.901		1.1	0.648969	0.06	0.14	1.2	1	0.0517887	0.9	0.01	0.05	1.31	0.89283	0.02	0.38	1.62
601	172045919	Q5TIE3	VW5B1	von Willebrand factor A domain-containing protein 5B1	1220	133.7	8.15		1.292	1.034	1.122	1.05	1.399	1.065	1.127	1.056	1.217	1.121	1.06	0.947	0.948	1.141	1.002	0.969	0.853	0.884		1.149	1.171	1.133	1.043	1.03	0.902		1.27	0.773812	0.04	0.35	1.39	1.3	0.554122	0.09	0.38	1.07	1.26	0.945939	0.02	0.33	1.79
602	2506380	Q08431	MFGM	Lactadherin	387	43.1	8.15		1.019	1.024	1.046	1.028	0.968	1.032	0.892	0.932	0.919	0.833	0.996	1.047	0.927	0.829	0.859	0.915	0.945	0.969		1.03	1.01	0.914	0.959	0.872	0.943		1.09	0.991353	0.01	0.13	2.1	1.07	0.663064	0.06	0.1	1.2	0.97	0.287673	0.21	-0.04	0.67
603	48429255	Q16610	ECM1	Extracellular matrix protein 1	540	60.6	6.71		1.101	0.973	1.009	0.981	1.11	1.042	0.983	1.083	0.965	1.047	1.097	1.048	1.007	0.921	1.01	0.932	0.981	0.948		1.028	1.044	1.011	1.064	0.979	0.954		1.08	0.397994	0.14	0.11	0.84	1.09	0.551888	0.09	0.13	1.07	1.06	0.276341	0.22	0.08	0.65
604	6919941	Q15113	PCOC1	Procollagen C-endopeptidase enhancer 1	449	47.9	7.43		1.075	1.173	1.05	1.091	1.285	1.022	1.013	0.896	0.983	1.069	0.966	0.96	0.986	0.882	1.025	0.969	1.041	0.888		1.099	1.133	0.964	0.998	0.964	0.966		1.14	0.566228	0.08	0.19	1.08	1.17	0.409738	0.14	0.23	0.86	1	0.0501338	0.97	0	0.01
605	172045828	Q92626	PXDN	Peroxidasin homolog	1479	165.2	7.17		0.996	1.035	0.995	1.097	1.097	0.999	0.935	0.94	0.883	1.085	1.048	1.033	1.071	0.953	1.081	1.045	1.041	0.933		1.008	1.065	0.919	1.055	1.035	1.006		1	0.0502805	0.96	0	0.02	1.06	0.207123	0.3	0.08	0.52	0.91	0.506569	0.1	-0.13	1
606	67462315	Q96CG8	CTHR1	Collagen triple helix repeat-containing protein 1	243	26.2	7.99		1.102	1.116	1.015	1.108	0.98	1.135	1.124	1.126	1.082	1.115	0.957	0.936	0.972	0.963	0.967	1.018	0.956	1.269		1.078	1.074	1.111	1.003	0.967	1.081		1	0.0500944	0.98	0	0.01	0.99	0.0504563	0.95	-0.01	0.02	1.03	0.0602758	0.77	0.04	0.11
607	218512060	Q92896	GSLG1	Golgi apparatus protein 1	1179	134.5	6.9		1.011	1.047	0.973	0.994	0.925	1.01	1.046	0.99	0.983	1.061	1.012	0.975	0.962	0.926	0.996	1.005	1.045	0.959		1.01	0.976	1.007	1.016	0.961	1.003		1.01	0.0548695	0.83	0.01	0.08	0.97	0.110782	0.5	-0.04	0.3	1	0.0516807	0.91	0.01	0.04
608	47115668	Q08380	LG3BP	Galectin-3-binding protein	585	65.3	5.27		1.04	1.006	0.949	0.963	1.023	0.956	1.012	0.939	0.942	1.125	1.161	1.053	1.079	1.041	1.079	1.092	1.096	1.084		0.998	0.981	0.965	1.113	1.067	1.091		0.92	0.881642	0.03	-0.13	1.59	0.9	0.994294	0.01	-0.15	2.14	0.88	0.995719	0.01	-0.18	2.19
609	308153615	P16070	CD44	CD44 antigen	742	81.5	5.33		1.039	1.051	1.052	0.974	0.921	0.959	1.033	1.009	1.011	1.053	1.013	0.978	0.996	0.966	0.961	0.998	1.039	0.984		1.047	0.951	1.018	1.015	0.975	1.007		1.04	0.585513	0.08	0.06	1.11	0.94	0.62048	0.07	-0.08	1.15	1.01	0.0893255	0.59	0.02	0.23
610	313104119	Q9UKX5	ITA11	Integrin alpha-11	1188	133.4	6.7		0.933	0.931	0.952	0.975	1.174	0.932	0.938	0.956	0.91	1.023	1.046	1.007	1.003	0.963	1.033	0.976	1.031	0.953		0.939	1.027	0.935	1.025	0.999	0.987		0.95	0.460059	0.12	-0.07	0.93	1.04	0.0782174	0.63	0.06	0.2	0.95	0.443291	0.12	-0.08	0.92
611	347595830	P26006	ITA3	Integrin alpha-3	1051	116.5	6.77		0.989	0.978	0.952	0.973	1.281	0.972	1.046	0.988	0.925	1.046	0.977	1.01	0.977	0.985	1.003	0.996	1.024	0.878		0.973	1.075	0.987	1.011	0.988	0.966		1.01	0.0524625	0.89	0.01	0.05	1.11	0.152732	0.39	0.15	0.41	1.02	0.0646494	0.74	0.03	0.13
612	311033436	P13612	ITA4	Integrin alpha-4	1032	114.8	6.48		0.966	0.981	0.986	0.977	1.038	0.995	1.018	0.943	0.956	0.976	0.87	0.834	0.809	0.828	0.835	1.119	0.953	1.271		0.978	1.004	0.972	0.893	0.824	1.115		0.88	0.289681	0.21	-0.19	0.68	0.9	0.203197	0.3	-0.15	0.52	0.87	0.296343	0.21	-0.2	0.68
613	23831237	P08648	ITA5	Integrin alpha-5	1049	114.5	5.77		1.027	1.002	1.007	1.016	1.07	1.003	1.086	1.066	1.04	1.04	0.991	0.994	0.955	0.94	0.93	0.991	0.983	1.003		1.012	1.03	1.064	1.009	0.942	0.992		1.02	0.492385	0.11	0.03	0.95	1.04	0.38638	0.15	0.05	0.81	1.07	0.992018	0.01	0.1	2.09
614	308153592	Q13683	ITA7	Integrin alpha-7	1181	128.9	5.73		0.886	0.957	0.867	0.875	0.682	0.871	0.99	0.807	1.022	1.164	1.13	1.022	1.077	1.047	1.105	1.093	1.196	1.065		0.903	0.809	0.939	1.105	1.076	1.118		0.81	0.977	0.01	-0.31	1.95	0.72	0.957276	0.01	-0.47	1.83	0.84	0.567379	0.08	-0.25	1.08
615	143811408	P06756	ITAV	Integrin alpha-V	1048	116	5.68		1.065	0.991	1.038	0.982	1.063	1.003	1.039	0.98	1.041	1.035	1.014	1.002	1.014	0.938	0.962	0.986	1.019	0.885		1.031	1.016	1.02	1.017	0.971	0.963		1.07	0.289031	0.21	0.1	0.68	1.05	0.188204	0.33	0.08	0.49	1.06	0.224628	0.28	0.08	0.56
616	218563324	P05556	ITB1	Integrin beta-1	798	88.4	5.39		1.031	1.05	1.029	1.023	0.943	0.991	1.046	1.012	1.039	1.039	1.019	1.001	0.982	0.942	0.964	0.998	1.023	0.923		1.037	0.986	1.032	1.02	0.963	0.981		1.06	0.399127	0.15	0.08	0.83	1	0.0518466	0.91	0.01	0.04	1.05	0.326638	0.19	0.07	0.73
617	317373394	Q9UBG0	MRC2	C-type mannose receptor 2	1479	166.6	5.83		0.867	0.953	0.914	0.991	0.831	0.997	1.029	1.122	0.996	1.049	1.062	0.975	1.013	0.913	0.982	0.943	1.034	0.861		0.912	0.94	1.049	1.029	0.97	0.946		0.96	0.0899891	0.57	-0.05	0.24	0.99	0.0507037	0.94	-0.01	0.03	1.11	0.340017	0.17	0.15	0.76
618	1346922	P15151	PVR	Poliovirus receptor	417	45.3	6.52		1.08	1.064	1.021	1.026	1.016	0.902	1.123	1.031	1.028	1.155	1.077	1.151	1.032	0.911	1.03	1.002	1.041	1.007		1.055	0.981	1.061	1.128	0.991	1.017		1.04	0.382449	0.15	0.05	0.83	0.97	0.131195	0.44	-0.05	0.35	1.04	0.237631	0.26	0.06	0.59
619	135666	P13726	TF	Tissue factor	295	33	7.03		1.11	1.115	0.987	0.993	1.093	0.972	1.08	1.037	1	1.055	0.994	1	0.954	0.948	0.993	0.98	0.89	1.021		1.071	1.019	1.039	1.017	0.965	0.964		1.11	0.419349	0.13	0.15	0.88	1.06	0.163901	0.36	0.08	0.44	1.08	0.346302	0.17	0.11	0.77
620	317373419	P50281	MMP14	Matrix metalloproteinase-14	582	65.9	7.77		1.036	0.954	0.984	0.956	0.905	0.91	1.058	1.06	0.964	0.947	0.93	0.903	0.932	0.933	0.889	0.971	1.001	0.864		0.991	0.924	1.027	0.926	0.918	0.945		1.05	0.149909	0.39	0.07	0.41	0.98	0.0737539	0.66	-0.03	0.18	1.09	0.31505	0.19	0.12	0.72
621	135854	P16035	TIMP2	Metalloproteinase inhibitor 2	220	24.4	7.49		0.852	0.902	0.976	1.024	0.609	1.004	0.843	1.001	0.947	0.973	0.895	0.976	0.91	0.97	0.914	0.964	0.938	1.026		0.91	0.879	0.93	0.948	0.931	0.976		0.93	0.288131	0.21	-0.1	0.68	0.9	0.103673	0.52	-0.15	0.28	0.95	0.131096	0.44	-0.07	0.36
622	417269	P28300	LYOX	Protein-lysine 6-oxidase	417	46.9	8.09		1.332	1.357	1.087	1.059	1.322	0.843	1.127	0.986	1.076	0.912	1.04	0.909	1.026	0.918	0.89	0.78	0.922	0.852		1.259	1.075	1.063	0.954	0.944	0.851		1.48	0.968177	0.01	0.56	1.88	1.26	0.309274	0.2	0.34	0.71	1.25	0.90824	0.02	0.32	1.66
623	317373571	P17252	KPCA	Protein kinase C alpha type	672	76.7	7.05		0.961	1.044	1.078	1.028	0.97	1.003	1.031	1.007	0.995	0.996	1.039	1.018	1.078	1.113	1.078	1.008	0.98	0.902		1.028	1.001	1.011	1.018	1.089	0.963		1.07	0.257279	0.24	0.09	0.62	1.04	0.172067	0.36	0.05	0.44	1.05	0.273406	0.22	0.07	0.65
624	6175086	O60701	UGDH	UDP-glucose 6-dehydrogenase	494	55	7.12		1.006	1.001	1.004	1.004	0.982	1.004	0.975	1.006	1.01	0.973	1.022	1.015	1.02	1.048	1.064	0.998	0.988	1.001		1.004	0.996	0.997	1.003	1.044	0.996		1.01	0.43062	0.14	0.01	0.85	1	0.05	0.97	0	0.01	1	0.0507734	0.93	0	0.03
625	215273869	P23284	PPIB	Peptidyl-prolyl cis-trans isomerase B	216	23.7	9.41		0.873	0.973	0.991	1.032	0.64	1.003	0.973	1.073	1.015	0.932	0.91	0.936	0.927	1.045	0.924	1.086	0.942	1.178		0.946	0.892	1.02	0.926	0.965	1.069		0.88	0.318512	0.19	-0.18	0.72	0.83	0.215433	0.28	-0.26	0.55	0.95	0.0966167	0.55	-0.07	0.26
626	239938818	P30530	UFO	Tyrosine-protein kinase receptor UFO	894	98.3	5.43		0.968	1.061	1.016	1.05	0.921	1.067	0.971	0.919	0.942	1.006	0.929	1.053	0.974	0.972	0.964	1.045	1.026	0.991		1.015	1.013	0.944	0.996	0.97	1.021		0.99	0.0539546	0.86	-0.01	0.06	0.99	0.0528738	0.88	-0.01	0.06	0.92	0.890593	0.02	-0.11	1.61
627	2507460	P07237	PDIA1	Protein disulfide-isomerase	508	57.1	4.87		1.008	1.03	0.997	0.991	0.843	1	1.074	1.038	1.039	1.012	0.98	0.969	0.959	0.966	0.963	1.064	1.003	1.011		1.012	0.945	1.05	0.987	0.963	1.026		0.99	0.0959195	0.54	-0.02	0.27	0.92	0.289932	0.21	-0.12	0.68	1.02	0.173832	0.34	0.03	0.47
628	158931120	Q53GQ0	DHB12	Estradiol 17-beta-dehydrogenase 12	312	34.3	9.32		1.06	1.111	1.014	1.03	0.68	1.036	1.067	1.087	1.021	1.085	1.01	1.051	1.017	1.005	0.987	1.069	1.076	0.94		1.062	0.915	1.058	1.048	1.003	1.028		1.03	0.0955156	0.56	0.05	0.25	0.89	0.137739	0.42	-0.17	0.38	1.03	0.0915123	0.57	0.04	0.25
629	215274252	P14735	IDE	Insulin-degrading enzyme	1019	117.9	6.61		1.022	0.997	1.026	0.873	1.565	0.85	1.012	0.896	0.903	1.043	1.058	1.026	1.1	1.074	0.98	1.182	0.994	1.231		1.015	1.096	0.937	1.042	1.051	1.135		0.89	0.341049	0.17	-0.16	0.76	0.97	0.0526918	0.88	-0.05	0.06	0.83	0.613442	0.07	-0.28	1.14
630	116241264	P15291	B4GT1	Beta-1,4-galactosyltransferase 1	398	43.9	8.65		1.314	1.302	1.235	1.15	1.434	1.075	1.077	1.022	1.081	0.976	0.937	0.946	0.843	0.988	0.971	1.092	1.022	1.02		1.284	1.22	1.06	0.953	0.934	1.045		1.23	0.999973	0	0.3	2.66	1.17	0.31361	0.19	0.22	0.71	1.01	0.0761818	0.65	0.02	0.19
631	6093731	O60568	PLOD3	Procollagen-lysine,2-oxoglutarate 5-dioxygenase 3	738	84.7	6.05		1.024	1.051	0.981	0.979	1.03	1.036	1.038	1.021	1.049	1.088	0.963	0.95	1.03	1.01	1.035	1.052	1.032	0.995		1.019	1.015	1.036	1	1.025	1.026		0.99	0.0575383	0.79	-0.01	0.1	0.99	0.0714206	0.68	-0.02	0.17	1.01	0.0811532	0.62	0.01	0.21
632	78099790	Q02809	PLOD1	Procollagen-lysine,2-oxoglutarate 5-dioxygenase 1	727	83.5	6.95		0.976	1.028	0.982	1.008	0.858	1.026	1.051	0.994	1.077	0.989	1	0.97	0.931	0.953	0.98	1.008	0.96	1.007		0.996	0.964	1.041	0.986	0.955	0.992		1	0.0532781	0.87	0.01	0.06	0.97	0.0772802	0.65	-0.04	0.19	1.05	0.351312	0.17	0.07	0.78
633	74714365	Q8IVL5	P3H2	Prolyl 3-hydroxylase 2	708	80.9	5.71		0.884	0.948	1.045	1.117	0.792	1.089	1.061	1.149	1.059	0.907	0.876	0.796	0.682	0.745	0.828	0.78	0.767	0.67		0.959	0.999	1.09	0.86	0.752	0.739		1.3	0.924821	0.02	0.38	1.71	1.35	0.593055	0.08	0.44	1.12	1.47	0.999998	0	0.56	2.81
634	109892809	Q32P28	P3H1	Prolyl 3-hydroxylase 1	736	83.3	5.14		1.052	1.087	0.993	0.997	1.069	1.021	1.07	1.051	1.013	0.974	0.961	0.974	0.973	0.951	1.003	1.03	1.048	1.018		1.044	1.029	1.045	0.97	0.975	1.032		1.01	0.0686285	0.7	0.02	0.16	1	0.0518309	0.89	0	0.05	1.01	0.101152	0.55	0.02	0.26
635	62906878	O00469	PLOD2	Procollagen-lysine,2-oxoglutarate 5-dioxygenase 2	737	84.6	6.71		0.974	1.02	0.985	0.982	0.921	0.983	1.037	1.08	1.01	1.028	0.995	0.996	0.978	0.981	0.957	1.038	1.027	1.017		0.993	0.962	1.042	1.006	0.972	1.027		0.97	0.549644	0.08	-0.05	1.07	0.94	0.792559	0.04	-0.1	1.43	1.01	0.103755	0.52	0.02	0.28
636	292495099	Q12884	SEPR	Prolyl endopeptidase FAP	760	87.7	6.65		1.034	1.02	1.013	0.951	1.235	0.93	0.973	0.999	0.909	1.052	1.07	1.103	1.001	0.972	1.002	1.03	1.069	0.981		1.022	1.039	0.96	1.075	0.992	1.027		1	0.0538863	0.87	-0.01	0.06	1.01	0.0514871	0.91	0.02	0.04	0.94	0.39754	0.15	-0.1	0.83
637	215273969	Q16832	DDR2	Discoidin domain-containing receptor 2	855	96.7	5.36		1.057	1.04	1.053	1.012	1.075	1.033	1.069	0.96	0.925	0.914	0.869	0.969	0.881	0.991	0.855	1.126	0.934	0.905		1.05	1.04	0.985	0.918	0.909	0.989		1.06	0.133538	0.43	0.09	0.37	1.05	0.104563	0.51	0.07	0.29	1	0.0502549	0.96	-0.01	0.02
638	166203665	Q06033	ITIH3	Inter-alpha-trypsin inhibitor heavy chain H3	890	99.8	5.74		1.025	0.979	0.976	1.024	1.167	0.984	0.885	0.718	0.789	0.968	1.047	0.889	0.907	1.077	0.984	1.23	1.106	1.302		0.993	1.058	0.798	0.968	0.989	1.213		0.82	0.915892	0.02	-0.29	1.68	0.87	0.442585	0.12	-0.2	0.9	0.66	0.998004	0.01	-0.6	2.28
639	112910	P02765	FETUA	Alpha-2-HS-glycoprotein	367	39.3	5.72		0.899	0.812	0.818	0.936	0.728	0.924	1.713	0.829	0.818	1.129	1.153	0.854	0.82	0.806	0.881	1.176	1.064	1.322		0.843	0.863	1.12	1.045	0.836	1.188		0.71	0.970845	0.01	-0.49	1.91	0.73	0.83581	0.03	-0.46	1.5	0.94	0.0552779	0.84	-0.08	0.08
640	118183	P01034	CYTC	Cystatin-C	146	15.8	8.75		1.021	1.02	0.957	0.942	1.176	0.871	0.901	1.03	0.806	1.072	1.099	1.124	1.057	0.991	1.046	1.031	1.095	0.942		1	0.996	0.912	1.098	1.031	1.023		0.98	0.0734921	0.66	-0.03	0.18	0.97	0.0574444	0.81	-0.04	0.09	0.89	0.266215	0.23	-0.16	0.63
641	20141241	P50454	SERPH	Serpin H1	418	46.4	8.69		0.916	1.008	0.989	1.022	0.771	1.035	1.016	1.059	1.039	0.97	0.923	0.934	0.944	1.029	0.95	1.104	0.991	1.172		0.971	0.943	1.038	0.943	0.974	1.089		0.89	0.453498	0.12	-0.17	0.92	0.87	0.277113	0.22	-0.21	0.66	0.95	0.146127	0.4	-0.07	0.4
642	13637934	Q03135	CAV1	Caveolin-1	178	20.5	6.02		1.052	1.068	0.984	1.025	0.885	1	1.079	1.022	1.026	1.039	0.934	0.98	1.005	1.017	0.984	1.136	1.02	1.071		1.035	0.97	1.043	0.984	1.002	1.076		0.96	0.152122	0.39	-0.06	0.41	0.9	0.44146	0.12	-0.15	0.91	0.97	0.130694	0.44	-0.04	0.36
643	74754297	Q7L5Y9	MAEA	Macrophage erythroblast attacher	396	45.3	8.69		1.042	1.008	1.148	1.065	1.013	1.271	0.841	1.17	0.771	0.843	0.96	0.942	1.017	0.893	0.837	0.897	0.969	0.846		1.066	1.117	0.928	0.915	0.915	0.904		1.18	0.765296	0.04	0.24	1.37	1.23	0.623761	0.07	0.3	1.16	1.03	0.0537457	0.86	0.04	0.06
644	730772	Q07021	C1QBP	Complement component 1 Q subcomponent-binding protein, mitochondrial	282	31.3	4.84		1.052	1.029	0.954	0.971	1.258	0.959	1.148	1.036	0.979	0.938	0.882	0.884	0.873	0.935	0.917	1.025	0.886	1.026		1.012	1.063	1.055	0.902	0.908	0.979		1.03	0.0886101	0.58	0.05	0.23	1.09	0.115215	0.48	0.12	0.32	1.08	0.185978	0.33	0.11	0.48
645	81175200	Q9Y490	TLN1	Talin-1	2541	269.6	6.07		0.964	0.966	1.005	1.001	0.911	1.019	0.953	1.014	1.02	0.968	1.008	1	1.038	1.049	1.029	0.977	0.985	0.979		0.978	0.977	0.996	0.992	1.038	0.98		1	0.0523192	0.89	0	0.05	1	0.050855	0.93	0	0.03	1.02	0.109688	0.52	0.02	0.28
646	46397817	P12814	ACTN1	Alpha-actinin-1	892	103	5.41		0.99	0.974	0.991	1.01	0.929	1.02	0.981	1.011	1.006	0.982	1.023	1.022	1.037	1.044	1.031	0.98	0.982	0.972		0.985	0.986	0.999	1.009	1.037	0.978		1.01	0.184539	0.34	0.01	0.46	1.01	0.0581442	0.79	0.01	0.1	1.02	0.51563	0.09	0.03	1.04
647	294862529	Q03001	DYST	Dystonin	7570	860.1	5.25		0.974	0.947	1.026	1.012	1.13	0.976	0.971	0.972	0.92	1.005	1.021	0.996	1.023	0.978	1.034	1.018	1.022	0.893		0.982	1.039	0.954	1.008	1.011	0.978		1	0.0507315	0.93	0.01	0.03	1.06	0.152264	0.38	0.09	0.41	0.98	0.0796445	0.63	-0.04	0.2
648	209572726	Q15149	PLEC	Plectin	4684	531.5	5.96		1.044	1.048	1.013	1.024	0.989	1.005	1.051	1.001	1.018	1.013	0.996	0.975	0.98	0.963	0.97	1.017	1.017	0.972		1.035	1.006	1.024	0.994	0.971	1.002		1.03	0.382373	0.15	0.05	0.82	1	0.0552165	0.84	0.01	0.07	1.02	0.169623	0.36	0.03	0.44
649	20978521	Q9NZU5	LMCD1	LIM and cysteine-rich domains protein 1	365	40.8	7.93		1.051	0.933	1.012	0.988	1.057	0.917	0.965	0.949	0.957	0.977	1.025	1.048	1.033	1.056	1.043	0.935	0.955	0.871		0.999	0.987	0.957	1.016	1.044	0.92		1.09	0.4058	0.14	0.12	0.84	1.07	0.264076	0.23	0.1	0.63	1.04	0.273751	0.23	0.06	0.64
650	1706133	P52943	CRIP2	Cysteine-rich protein 2	208	22.5	8.72		1.09	1.026	1.032	1.035	1.05	1.101	1.029	1.065	1.096	1.091	1.076	1.187	1.247	0.993	1.02	1.059	1.173	0.817		1.049	1.062	1.063	1.118	1.086	1.016		1.03	0.0601814	0.77	0.05	0.11	1.04	0.0698699	0.69	0.06	0.16	1.05	0.0707926	0.68	0.07	0.17
651	317373486	P49023	PAXI	Paxillin	591	64.5	6.19		0.882	0.958	0.999	1.019	0.858	1.035	0.964	0.99	0.961	0.954	1.033	0.988	1.021	1.123	1.066	1.053	0.947	1.132		0.946	0.971	0.972	0.992	1.07	1.044		0.91	0.305962	0.2	-0.14	0.7	0.93	0.145452	0.4	-0.11	0.4	0.93	0.240626	0.25	-0.1	0.6
652	317373536	P98160	PGBM	Basement membrane-specific heparan sulfate proteoglycan core protein	4391	468.5	6.51		1.008	0.999	0.947	0.98	0.937	0.978	0.95	0.943	0.935	0.869	0.985	1.012	1.002	0.986	0.969	0.963	1.025	1.005		0.985	0.965	0.943	0.956	0.985	0.998		0.99	0.0761016	0.64	-0.02	0.19	0.97	0.272673	0.22	-0.05	0.65	0.94	0.764238	0.04	-0.08	1.39
653	229463011	P18827	SDC1	Syndecan-1	310	32.4	4.63		1.15	1.082	1.111	0.915	1.023	1.013	1.106	1.005	1.03	1.088	0.968	1.061	0.797	1.007	0.968	0.908	0.9	1.076		1.115	0.984	1.047	1.039	0.924	0.961		1.16	0.648518	0.07	0.21	1.19	1.02	0.0626322	0.75	0.03	0.12	1.09	0.24081	0.26	0.12	0.59
654	158962336	P34741	SDC2	Syndecan-2	201	22.1	4.86		0.958	0.956	0.912	0.961	0.964	0.944	0.983	0.986	0.935	1.195	0.899	0.925	0.91	0.793	0.827	1.062	1.092	0.849		0.942	0.956	0.968	1.006	0.843	1.001		0.94	0.111986	0.49	-0.09	0.31	0.96	0.0870166	0.59	-0.07	0.23	0.97	0.0690575	0.69	-0.05	0.16
655	129379	P10809	CH60	60 kDa heat shock protein, mitochondrial	573	61	5.87		1.025	1.047	1.005	1.003	0.921	1.002	1.092	1.043	1.023	1.004	0.97	0.964	0.969	0.953	0.972	1.051	1.001	0.991		1.026	0.975	1.052	0.979	0.965	1.014		1.01	0.0814984	0.63	0.02	0.2	0.96	0.203032	0.3	-0.06	0.52	1.04	0.255118	0.24	0.05	0.62
656	113950	P07355	ANXA2	Annexin A2	339	38.6	7.75		0.989	0.974	1.009	1.004	0.879	1.011	0.967	0.994	1.024	0.973	1.029	1.034	1.06	1.055	1.053	0.957	0.982	0.941		0.991	0.964	0.995	1.012	1.056	0.96		1.03	0.455583	0.12	0.04	0.9	1	0.0508607	0.93	0.01	0.03	1.04	0.365602	0.16	0.05	0.8
657	1703319	P09525	ANXA4	Annexin A4	319	35.9	6.13		0.947	1.019	0.999	1.058	0.72	1.043	1.024	1.024	1.082	0.985	1.013	1	1.047	1.105	1.024	1.004	0.992	1.028		0.988	0.94	1.043	1	1.059	1.008		0.98	0.125764	0.46	-0.03	0.34	0.93	0.0906152	0.57	-0.1	0.24	1.03	0.321239	0.18	0.05	0.74
658	117501	P27797	CALR	Calreticulin	417	48.1	4.44		0.907	1.003	0.962	1.025	0.701	1.016	1.065	1.096	1.071	0.982	0.955	0.938	0.964	1.038	0.953	1.073	0.984	1.162		0.957	0.914	1.077	0.958	0.985	1.073		0.89	0.457458	0.12	-0.16	0.92	0.85	0.246419	0.25	-0.23	0.6	1	0.0506244	0.94	0.01	0.03
659	85687560	P48509	CD151	CD151 antigen	253	28.3	7.47		1.167	1.125	0.962	1.059	1.058	1.173	1.126	1.189	1.06	1.097	1.056	0.955	1.076	0.973	1.037	1.119	1.133	1.01		1.084	1.096	1.125	1.036	1.029	1.087		1	0.0501769	0.97	0	0.01	1.01	0.0529101	0.88	0.01	0.06	1.03	0.103827	0.53	0.05	0.28
660	126155	P09382	LEG1	Galectin-1	135	14.7	5.5		0.913	0.961	0.996	1.013	0.781	1.033	0.943	1.005	1.036	0.982	1.033	1.024	1.065	1.141	1.097	0.995	0.94	1.035		0.956	0.942	0.995	1.013	1.101	0.99		0.97	0.14394	0.41	-0.05	0.39	0.95	0.0839618	0.6	-0.07	0.22	1	0.0517698	0.91	0.01	0.04
661	215274262	P17931	LEG3	Galectin-3	250	26.1	8.56		0.858	0.971	1.032	0.967	0.723	0.987	0.955	0.976	1.001	0.976	1.046	1.027	1.039	1.016	1.048	0.976	0.951	0.94		0.953	0.892	0.977	1.017	1.034	0.956		1	0.0503536	0.97	0	0.01	0.93	0.11057	0.5	-0.1	0.3	1.02	0.215457	0.27	0.03	0.57
662	292495012	P35052	GPC1	Glypican-1	558	61.6	7.3		1.13	1.035	0.985	1.06	1.312	1.049	1.18	1.028	1.017	1.032	0.98	1.032	0.956	0.985	0.938	0.981	1.111	1.103		1.05	1.14	1.075	1.014	0.959	1.065		0.99	0.056715	0.82	-0.02	0.09	1.07	0.11659	0.47	0.1	0.32	1.01	0.0523507	0.89	0.01	0.05
663	1708022	P51654	GPC3	Glypican-3	580	65.5	6.37		0.685	0.858	1.145	0.609	0.713	0.492	0.49	0.629	0.702	0.629	0.956	1.299	0.538	0.511	0.373	0.552	0.747	0.673		0.896	0.605	0.607	0.962	0.474	0.657		1.36	0.338449	0.18	0.45	0.75	0.92	0.0898792	0.57	-0.12	0.24	0.92	0.0879369	0.58	-0.11	0.23
664	92090606	P07900	HS90A	Heat shock protein HSP 90-alpha	732	84.6	5.02		0.936	0.955	1.007	1.018	0.839	1.029	0.972	1.026	1.026	0.938	0.973	0.996	1	1.073	1.017	0.991	0.963	1.013		0.966	0.962	1.008	0.969	1.03	0.989		0.98	0.137072	0.42	-0.03	0.37	0.97	0.0695262	0.69	-0.04	0.16	1.02	0.123367	0.45	0.03	0.34
665	20455519	P37235	HPCL1	Hippocalcin-like protein 1	193	22.3	5.35		1.111	1.161	1.021	0.971	1.176	0.942	0.956	0.886	1.016	0.869	0.972	1.005	0.925	0.98	0.962	0.877	0.97	0.982		1.098	1.029	0.953	0.948	0.955	0.943		1.16	0.767192	0.04	0.22	1.37	1.09	0.17342	0.34	0.13	0.46	1.01	0.0542469	0.86	0.01	0.07
666	229463023	A1X283	SPD2B	SH3 and PX domain-containing protein 2B	911	101.5	8.69		1.411	1.06	1.34	1.388	1.744	1.183	1.3	1.202	1.128	1.092	1.124	1.185	1.047	0.974	1.034	0.846	1.03	0.648		1.27	1.438	1.21	1.133	1.019	0.842		1.51	0.723798	0.05	0.59	1.31	1.71	0.786811	0.04	0.77	1.41	1.44	0.792678	0.04	0.52	1.42
667	134611	P00441	SODC	Superoxide dismutase [Cu-Zn]	154	15.9	6.13		1.02	0.981	1.008	1.063	1.063	1.023	0.954	1.017	1.064	0.888	0.951	0.965	0.991	1.127	1.049	0.981	0.923	1.107		1.003	1.05	1.012	0.935	1.056	1.003		1	0.05	0.99	0	0	1.05	0.126591	0.45	0.07	0.34	1.01	0.0521779	0.9	0.01	0.04
668	2497677	Q15942	ZYX	Zyxin	572	61.2	6.67		1.057	0.956	0.996	0.959	1.25	0.963	1.014	0.984	1.028	0.985	1.085	1.043	1.066	0.99	1.064	0.917	0.989	0.885		1.003	1.057	1.009	1.038	1.04	0.93		1.08	0.363982	0.16	0.11	0.79	1.14	0.221681	0.28	0.19	0.56	1.08	0.591297	0.08	0.12	1.11
669	112927	P05067	A4	Amyloid beta A4 protein	770	86.9	4.82		0.898	0.967	0.968	0.961	0.959	0.944	0.833	0.885	0.785	1.111	1.011	1.049	0.978	0.922	1.054	1.008	1.074	0.909		0.944	0.955	0.834	1.057	0.985	0.997		0.95	0.157756	0.38	-0.08	0.43	0.96	0.132235	0.43	-0.06	0.37	0.84	0.759713	0.04	-0.26	1.36
670	17372894	O75718	CRTAP	Cartilage-associated protein	401	46.5	5.73		0.992	1.027	1.004	1.044	0.71	1.069	0.994	1.025	1.061	0.96	0.922	0.957	0.939	1.002	0.98	1.002	0.961	1.121		1.008	0.941	1.027	0.946	0.974	1.028		0.98	0.0677976	0.7	-0.03	0.15	0.92	0.102088	0.52	-0.13	0.28	1	0.0500398	0.98	0	0.01
671	59802987	O75153	CLU	Clustered mitochondria protein homolog	1309	146.6	6.13		0.925	0.976	1.013	1.096	1.033	1.034	0.948	1.042	1.001	1.022	1.063	1.032	1.064	0.958	1.012	0.951	1.019	0.859		0.971	1.054	0.997	1.039	1.011	0.943		1.03	0.0800946	0.62	0.04	0.21	1.12	0.527743	0.09	0.16	1.03	1.06	0.15979	0.37	0.08	0.43
672	3183518	Q05397	FAK1	Focal adhesion kinase 1	1052	119.2	6.62		0.991	0.916	1.061	1.023	1.005	1.016	0.97	0.968	0.995	1.048	0.982	1.127	0.977	1.093	0.997	0.993	0.907	0.93		0.989	1.015	0.977	1.052	1.022	0.943		1.05	0.145274	0.41	0.07	0.39	1.08	0.712453	0.05	0.1	1.27	1.04	0.220936	0.28	0.05	0.55
673	548350	P21359	NF1	Neurofibromin	2839	319.2	7.39		0.955	0.861	0.876	0.929	1.129	0.887	0.929	0.909	0.888	1.024	1.117	0.989	1.023	0.89	0.985	0.95	0.979	0.834		0.897	0.982	0.909	1.043	0.966	0.921		0.97	0.0719666	0.68	-0.04	0.17	1.07	0.103342	0.52	0.09	0.28	0.99	0.0573145	0.8	-0.02	0.1
674	119540	P18074	ERCC2	TFIIH basal transcription factor complex helicase XPD subunit	760	86.9	7.15		0.971	0.985	1.046	1.048	0.972	1.064	0.993	1.114	1.009	0.961	0.957	1.038	0.971	1.084	0.916	0.999	0.942	1.037		1.001	1.028	1.039	0.985	0.99	0.993		1.01	0.0552857	0.84	0.01	0.08	1.04	0.134836	0.42	0.05	0.38	1.05	0.154499	0.38	0.07	0.42
675	22096235	Q9UBB9	TFP11	Tuftelin-interacting protein 11	837	96.8	5.67		1.073	1.02	1.029	1.041	0.832	0.976	1.031	0.99	1.005	0.972	0.927	0.905	0.973	0.921	0.95	0.923	0.928	0.934		1.041	0.95	1.009	0.935	0.948	0.928		1.12	0.999943	0	0.16	2.59	1.02	0.0635443	0.75	0.03	0.13	1.09	0.99988	0	0.12	2.54
676	158939322	P46108	CRK	Adapter molecule crk	304	33.8	5.55		0.96	0.98	1.034	0.976	0.901	1.024	0.967	1	1.046	0.958	1.006	1.039	1.027	1.013	1.047	0.994	0.973	0.96		0.992	0.967	1.004	1.001	1.029	0.976		1.02	0.0970928	0.54	0.02	0.27	0.99	0.0562702	0.83	-0.01	0.08	1.03	0.187089	0.32	0.04	0.5
677	1169094	P46109	CRKL	Crk-like protein	303	33.8	6.74		0.938	0.959	0.975	1.023	0.908	1.039	0.986	0.99	1.019	0.95	1.02	1.041	1.053	1.026	1.051	0.95	0.982	0.884		0.957	0.99	0.998	1.004	1.043	0.939		1.02	0.0868252	0.58	0.03	0.24	1.05	0.161654	0.36	0.08	0.44	1.06	0.435711	0.12	0.09	0.91
678	125711	P12931	SRC	Proto-oncogene tyrosine-protein kinase Src	536	59.8	7.42		0.919	1.039	1.002	1.023	1	0.966	1.095	1.237	0.918	1.202	1.18	1.151	1.183	1.14	1.066	1.086	1.164	1.156		0.987	0.996	1.083	1.178	1.13	1.136		0.87	0.876654	0.03	-0.2	1.58	0.88	0.986114	0.01	-0.19	2.02	0.95	0.0831017	0.61	-0.07	0.21
679	51702787	P63000	RAC1	Ras-related C3 botulinum toxin substrate 1	192	21.4	8.5		0.882	1.015	1.014	1.064	0.623	0.976	0.967	1.114	1.018	0.974	0.996	1.031	1.045	1.097	0.96	0.999	0.998	0.991		0.97	0.888	1.033	1	1.034	0.996		0.97	0.0871894	0.59	-0.04	0.23	0.89	0.119565	0.47	-0.17	0.33	1.04	0.129703	0.44	0.05	0.35
680	131806	P15153	RAC2	Ras-related C3 botulinum toxin substrate 2	192	21.4	7.61		0.85	0.868	0.93	0.918	0.716	0.985	0.917	1.015	0.846	0.879	0.957	0.955	1.002	1.004	1.029	0.983	0.93	1.114		0.883	0.873	0.926	0.931	1.011	1.009		0.87	0.50044	0.1	-0.19	0.99	0.87	0.260735	0.24	-0.21	0.63	0.92	0.189194	0.32	-0.12	0.49
681	322510015	P60953	CDC42	Cell division control protein 42 homolog	191	21.2	6.55		1.104	1.041	1.055	0.989	0.976	0.999	1.01	1.002	1.001	1.033	1.029	0.991	1.051	0.987	1.03	0.965	1.027	0.917		1.067	0.988	1.004	1.018	1.023	0.969		1.1	0.680593	0.06	0.14	1.23	1.02	0.0867297	0.6	0.03	0.22	1.04	0.180548	0.34	0.05	0.47
682	47605999	Q13464	ROCK1	Rho-associated protein kinase 1	1354	158.1	5.9		0.948	0.994	0.992	0.997	0.961	1.018	0.965	0.992	0.998	1.037	0.977	1.047	1.059	1.051	1.057	1.006	0.994	0.95		0.978	0.992	0.985	1.02	1.056	0.983		0.99	0.0551795	0.84	-0.01	0.08	1.01	0.0652995	0.73	0.01	0.14	1	0.0510853	0.93	0	0.03
683	269849761	O75116	ROCK2	Rho-associated protein kinase 2	1388	160.8	6.02		0.983	0.979	0.999	0.997	0.933	0.996	0.938	0.994	1.007	1.05	1.021	1.003	1.113	0.988	1.024	0.939	1.037	0.907		0.987	0.975	0.98	1.025	1.042	0.961		1.03	0.0965528	0.55	0.04	0.26	1.01	0.060596	0.76	0.02	0.12	1.02	0.0695677	0.7	0.03	0.16
684	317373532	Q8TBX8	PI42C	Phosphatidylinositol 5-phosphate 4-kinase type-2 gamma	421	47.3	6.84		0.974	1.128	1.013	1.097	0.664	1.066	0.933	0.881	1.131	0.981	1.119	1.034	1.075	1.083	0.948	1.151	1.101	1.176		1.039	0.942	0.982	1.044	1.035	1.143		0.91	0.473519	0.11	-0.14	0.95	0.82	0.269769	0.23	-0.28	0.64	0.86	0.473479	0.11	-0.22	0.95
685	300669693	Q9Y2I7	FYV1	1-phosphatidylinositol 3-phosphate 5-kinase	2098	237	6.7		0.577	1.246	0.924	1.205	0	0.806	1.215	0.498	0.692	1.441	1.282	0.77	1.235	1.068	0.988	1.084	1.171	1.153		0.916	0.67	0.802	1.164	1.097	1.136		0.81	0.188666	0.32	-0.31	0.49	0.59	0.237001	0.26	-0.76	0.58	0.71	0.308378	0.2	-0.5	0.71
686	1170586	P46940	IQGA1	Ras GTPase-activating-like protein IQGAP1	1657	189.1	6.48		0.925	0.98	0.977	1.016	0.802	1.029	0.974	1.032	1.018	0.974	0.987	1	0.998	1.074	1.02	1.027	0.989	1.057		0.96	0.949	1.008	0.987	1.031	1.024		0.94	0.605619	0.07	-0.09	1.14	0.93	0.155421	0.38	-0.11	0.42	0.98	0.0898294	0.57	-0.02	0.25
687	229462887	Q86VI3	IQGA3	Ras GTPase-activating-like protein IQGAP3	1631	184.6	7.65		0.954	0.991	1.055	0.988	0.905	1.044	0.967	0.919	1.002	0.983	1.142	1.094	1.091	1.171	1.114	1.092	1.143	1.148		1	0.979	0.963	1.073	1.125	1.128		0.89	0.916652	0.02	-0.17	1.67	0.87	0.864254	0.03	-0.2	1.55	0.85	0.997827	0.01	-0.23	2.27
688	41017262	O14974	MYPT1	Protein phosphatase 1 regulatory subunit 12A	1030	115.2	5.4		1.1	1.04	1.042	0.999	0.921	1.019	0.975	0.983	1.023	1.06	1.019	0.999	1.017	0.954	1.022	0.978	1.052	0.93		1.061	0.98	0.994	1.026	0.998	0.987		1.08	0.400731	0.14	0.1	0.85	0.99	0.0524268	0.89	-0.01	0.05	1.01	0.0535324	0.86	0.01	0.06
689	74752476	Q9BZL4	PP12C	Protein phosphatase 1 regulatory subunit 12C	782	84.8	5.57		1.064	0.997	1.003	1.048	1.106	1.014	0.945	0.893	0.914	1.161	1.147	1.027	1.084	0.992	1.01	1.048	1.096	0.924		1.021	1.056	0.917	1.112	1.029	1.023		1	0.0501382	0.97	0	0.01	1.03	0.0850127	0.6	0.05	0.22	0.9	0.457049	0.12	-0.16	0.93
690	143811432	Q13177	PAK2	Serine/threonine-protein kinase PAK 2	524	58	5.96		0.913	0.963	1.015	1.023	0.829	1.056	0.923	1.049	0.976	0.971	1.024	1.029	1.031	1.004	1.046	0.962	0.991	0.9		0.964	0.969	0.982	1.008	1.027	0.951		1.01	0.0613837	0.76	0.02	0.12	1.02	0.0560314	0.82	0.03	0.09	1.03	0.100507	0.53	0.05	0.28
691	12585288	O96013	PAK4	Serine/threonine-protein kinase PAK 4	591	64	9.73		0.967	0.964	0.929	0.961	0.873	0.959	0.984	0.984	0.967	0.932	0.933	0.954	0.991	0.973	1.053	0.987	0.933	0.971		0.953	0.931	0.979	0.94	1.006	0.964		0.99	0.0821112	0.62	-0.02	0.2	0.97	0.157914	0.38	-0.05	0.42	1.02	0.134641	0.44	0.02	0.36
692	62291053	O00401	WASL	Neural Wiskott-Aldrich syndrome protein	505	54.8	7.93		1.064	1.067	0.953	1.092	1.065	0.924	0.981	1.086	1.179	0.973	0.936	1.016	0.971	1.021	0.993	0.965	0.997	1.067		1.028	1.027	1.082	0.975	0.995	1.01		1.02	0.0649874	0.72	0.03	0.14	1.02	0.0585288	0.79	0.02	0.1	1.07	0.185135	0.33	0.1	0.48
693	48428086	Q8N8S7	ENAH	Protein enabled homolog	591	66.5	6.93		0.93	0.982	1.056	0.988	1.023	1.035	1.003	1.02	1.072	0.966	1.039	1.022	1.045	0.966	1.015	0.936	0.973	0.894		0.989	1.016	1.032	1.009	1.009	0.935		1.06	0.220927	0.27	0.08	0.56	1.09	0.787474	0.04	0.12	1.41	1.1	0.817156	0.03	0.14	1.46
694	74730773	Q8WUW1	BRK1	Protein BRICK1	75	8.7	5.45		0.861	0.899	0.944	0.978	0.825	1.026	0.832	0.988	0.971	0.925	0.904	1.001	0.969	1.232	1.003	1.052	0.903	1.381		0.901	0.943	0.93	0.943	1.068	1.112		0.81	0.284846	0.22	-0.3	0.67	0.85	0.181724	0.33	-0.24	0.48	0.84	0.211169	0.29	-0.26	0.54
695	59800456	Q9Y6W5	WASF2	Wiskott-Aldrich syndrome protein family member 2	498	54.3	5.53		0.97	0.942	1.121	1.055	1.031	1.011	1.029	0.943	0.986	1.022	1.019	0.998	1.032	0.91	1.015	0.886	1.007	0.788		1.011	1.033	0.986	1.013	0.986	0.894		1.13	0.259253	0.24	0.18	0.62	1.16	0.516392	0.1	0.21	1.01	1.1	0.248748	0.25	0.14	0.61
696	130979	P07737	PROF1	Profilin-1	140	15	8.27		0.905	0.928	0.988	1.005	0.782	1.038	0.923	1.029	1.02	0.898	0.949	0.986	0.985	1.155	1.039	0.981	0.909	1.075		0.94	0.942	0.991	0.944	1.06	0.988		0.95	0.135604	0.43	-0.07	0.37	0.95	0.0758943	0.65	-0.07	0.19	1	0.050277	0.97	0	0.01
697	20178322	P35080	PROF2	Profilin-2	140	15	6.99		0.899	0.925	0.939	0.955	0.92	0.971	0.97	0.998	0.993	0.953	1.01	1.022	1.106	1.068	1.048	0.945	1.023	0.914		0.921	0.949	0.987	0.995	1.074	0.961		0.96	0.196603	0.32	-0.06	0.5	0.99	0.0620487	0.76	-0.02	0.12	1.03	0.115004	0.47	0.04	0.32
698	116848	P23528	COF1	Cofilin-1	166	18.5	8.09		1.002	0.989	1.016	0.984	1.004	1.005	0.975	1	1.052	0.953	1.021	1.029	1.078	1.065	1.085	0.944	0.947	0.92		1.002	0.998	1.009	1.001	1.076	0.937		1.07	0.998387	0	0.1	2.32	1.07	0.998183	0.01	0.09	2.29	1.08	0.775137	0.04	0.11	1.39
699	6831517	Q9Y281	COF2	Cofilin-2	166	18.7	7.88		0.865	0.946	1.026	1.038	0.653	1.037	0.909	0.951	0.969	1.013	1.048	1.039	1.054	1.113	1.092	1.033	0.975	1.013		0.946	0.91	0.943	1.033	1.087	1.007		0.94	0.215413	0.28	-0.09	0.55	0.9	0.110891	0.49	-0.15	0.31	0.94	0.668622	0.06	-0.1	1.22
700	13123943	O43707	ACTN4	Alpha-actinin-4	911	104.8	5.44		0.99	0.984	0.99	0.992	0.929	1.03	0.967	0.982	1.03	0.991	0.998	1.022	1.018	1.043	1.026	1.007	0.98	0.957		0.988	0.984	0.993	1.004	1.029	0.981		1.01	0.0747182	0.65	0.01	0.19	1	0.0508912	0.94	0	0.03	1.01	0.0771443	0.64	0.02	0.19
701	125987826	P15311	EZRI	Ezrin	586	69.4	6.27		1.036	0.969	0.997	1.003	1.013	0.998	0.991	0.994	0.993	0.983	1.041	1.037	1.047	0.998	1.07	0.93	0.999	0.841		1.001	1.005	0.993	1.02	1.038	0.923		1.08	0.315354	0.19	0.12	0.71	1.09	0.387216	0.15	0.12	0.82	1.08	0.302751	0.2	0.11	0.69
702	127234	P26038	MOES	Moesin	577	67.8	6.4		1.016	0.992	1.029	1.008	1.01	1.001	0.993	1.012	1.043	0.981	1.052	1.047	1.06	1.032	1.055	0.949	0.981	0.931		1.012	1.006	1.016	1.027	1.049	0.954		1.06	0.826582	0.03	0.09	1.48	1.05	0.885533	0.03	0.08	1.58	1.07	0.783441	0.04	0.09	1.39
703	464541	P35241	RADI	Radixin	583	68.5	6.37		1.002	1.01	1.006	1.044	1.029	1.042	0.979	1.015	1.025	1.014	1.084	1.082	1.049	1.029	1.052	0.976	1.049	0.887		1.006	1.038	1.006	1.06	1.043	0.971		1.04	0.110245	0.49	0.05	0.31	1.07	0.269635	0.22	0.1	0.65	1.04	0.105412	0.5	0.05	0.3
704	74752229	Q9BPX5	ARP5L	Actin-related protein 2/3 complex subunit 5-like protein	153	16.9	6.6		1.013	0.86	0.837	0.776	0.917	0.928	0.806	1.004	0.74	1.024	1.03	1.045	1.029	0.749	0.89	0.931	1.059	0.777		0.903	0.873	0.85	1.033	0.889	0.922		0.98	0.0539716	0.86	-0.03	0.07	0.95	0.0785347	0.63	-0.08	0.2	0.92	0.0931991	0.56	-0.12	0.25
705	6166599	P35579	MYH9	Myosin-9	1960	226.4	5.6		0.993	0.99	1.008	0.999	0.95	1.007	1.023	1.031	1.033	0.974	1.017	1.02	1.024	1.029	1.023	0.998	0.991	0.98		0.997	0.985	1.029	1.004	1.025	0.989		1.01	0.169204	0.38	0.01	0.42	1	0.0549506	0.83	-0.01	0.08	1.04	0.9999	0	0.06	2.51
706	215274129	P35580	MYH10	Myosin-10	1976	228.9	5.54		1.007	0.999	0.988	1.004	1.045	1.014	1.034	1.02	1.036	1.006	1.009	1.025	1.048	1.018	1.044	0.981	1.03	0.95		0.998	1.021	1.03	1.013	1.036	0.987		1.01	0.0726668	0.68	0.02	0.17	1.03	0.231068	0.27	0.05	0.57	1.04	0.394121	0.15	0.06	0.83
707	327478526	Q7Z406	MYH14	Myosin-14	1995	227.7	5.6		0.785	0.873	0.947	0.972	0.499	1.06	0.926	1.044	0.981	0.884	0.954	0.92	0.94	1.127	1.01	1.042	0.947	1.338		0.868	0.844	0.984	0.919	1.025	1.109		0.78	0.428048	0.13	-0.35	0.89	0.76	0.222923	0.28	-0.39	0.56	0.89	0.163171	0.36	-0.17	0.44
708	20141521	P24844	MYL9	Myosin regulatory light polypeptide 9	172	19.8	4.92		0.926	1.004	0.948	0.974	1.087	0.967	0.973	0.97	0.965	0.993	1.005	0.994	1.034	0.993	1.004	0.962	0.977	0.977		0.959	1.009	0.97	0.997	1.01	0.972		0.99	0.0822179	0.63	-0.02	0.2	1.04	0.1468	0.4	0.05	0.4	1	0.0640604	0.67	0	0.17
709	127169	P19105	ML12A	Myosin regulatory light chain 12A	171	19.8	4.81		1.001	0.987	1.007	0.981	1.005	1.011	1.014	1.018	1.032	1.032	1.05	1.05	1.02	1.006	1.049	0.97	1.018	0.88		0.998	0.999	1.021	1.044	1.025	0.956		1.04	0.164881	0.36	0.06	0.45	1.05	0.167008	0.36	0.06	0.45	1.07	0.322732	0.18	0.1	0.74
710	21903479	P18206	VINC	Vinculin	1134	123.7	5.66		0.955	0.99	1.029	1.005	0.89	1.014	0.964	1.007	1.032	1.006	1.045	1.053	1.072	1.062	1.072	0.976	0.992	0.947		0.992	0.97	1.001	1.034	1.069	0.972		1.02	0.118749	0.48	0.03	0.32	1	0.0502412	0.96	0	0.02	1.03	0.211305	0.3	0.04	0.53
711	121116	P06396	GELS	Gelsolin	782	85.6	6.28		0.996	0.967	1.026	0.988	0.944	1.008	0.982	0.995	1.057	0.973	1.081	1.09	1.042	1.019	1.095	0.911	0.968	0.878		0.996	0.98	1.012	1.048	1.052	0.919		1.08	0.622192	0.07	0.12	1.16	1.07	0.421722	0.13	0.09	0.88	1.1	0.685586	0.06	0.14	1.24
712	300669714	Q15746	MYLK	Myosin light chain kinase, smooth muscle	1914	210.6	6.15		1.027	1.087	1.003	1.065	1.092	0.983	1.04	0.974	1.051	1.011	1.077	1.077	1.014	1.083	1.051	1.094	0.989	1.052		1.039	1.047	1.022	1.055	1.049	1.045		0.99	0.0524685	0.89	-0.01	0.05	1	0.0502125	0.97	0	0.01	0.98	0.0877466	0.58	-0.03	0.23
713	50400673	Q9NYB9	ABI2	Abl interactor 2	513	55.6	6.16		0.966	0.942	0.946	1.033	1.132	0.943	0.958	0.946	0.955	0.969	1.036	0.898	0.889	0.948	0.966	0.944	0.936	0.847		0.951	1.036	0.953	0.968	0.934	0.909		1.05	0.237826	0.26	0.07	0.59	1.14	0.470406	0.11	0.19	0.94	1.05	0.264485	0.23	0.07	0.63
714	74738589	Q7L576	CYFP1	Cytoplasmic FMR1-interacting protein 1	1253	145.1	6.9		0.946	0.969	1.009	1.01	1.004	1.025	1.015	1.06	1.006	1.038	0.982	1.006	0.976	1.031	1.021	0.959	1	1.063		0.975	1.013	1.027	1.009	1.009	1.007		0.97	0.138712	0.41	-0.05	0.39	1.01	0.0540266	0.86	0.01	0.07	1.02	0.0860671	0.6	0.03	0.22
715	12643947	Q9Y2A7	NCKP1	Nck-associated protein 1	1128	128.7	6.62		0.903	0.933	0.96	0.98	0.814	1.037	0.968	1.048	1.023	0.932	0.994	1	0.96	1.051	0.988	0.987	0.989	0.971		0.932	0.944	1.013	0.976	0.999	0.982		0.95	0.748343	0.04	-0.08	1.36	0.96	0.0844774	0.6	-0.06	0.22	1.03	0.227035	0.28	0.04	0.55
716	73917636	Q9UQB8	BAIP2	Brain-specific angiogenesis inhibitor 1-associated protein 2	552	60.8	8.9		1.104	1.024	0.968	1.088	1.162	0.954	0.994	0.968	1.013	1.057	0.987	1.011	1.042	1.023	0.993	1.098	1.094	1.033		1.032	1.068	0.991	1.018	1.019	1.075		0.96	0.150531	0.39	-0.06	0.41	0.99	0.0512591	0.92	-0.01	0.04	0.92	0.867996	0.03	-0.12	1.55
717	50403776	Q14155	ARHG7	Rho guanine nucleotide exchange factor 7	803	90	7.09		1.045	1.005	1.027	0.955	1.269	0.943	1.003	1.058	1.031	1.036	1.019	1.05	1.015	0.864	1.025	0.948	1.02	0.849		1.026	1.055	1.031	1.035	0.968	0.939		1.09	0.361439	0.16	0.13	0.79	1.12	0.155697	0.38	0.17	0.42	1.1	0.381302	0.15	0.13	0.82
718	215273970	O60610	DIAP1	Protein diaphanous homolog 1	1272	141.3	5.41		0.983	1.034	1.073	1.021	1.029	1.115	1.093	1.052	1.032	0.99	1.007	1.03	0.977	1.014	0.965	0.966	0.994	0.947		1.03	1.055	1.059	1.009	0.985	0.969		1.06	0.48876	0.11	0.09	0.97	1.09	0.669134	0.06	0.12	1.23	1.09	0.94709	0.02	0.13	1.77
719	158520000	Q9NSV4	DIAP3	Protein diaphanous homolog 3	1193	136.8	7.03		0.911	1.01	0.956	1.016	0.912	1.054	0.964	0.929	0.956	1.078	1.061	0.983	1.027	0.977	1.002	1.052	1.035	0.972		0.959	0.994	0.949	1.041	1.002	1.019		0.94	0.324245	0.18	-0.09	0.74	0.97	0.0780531	0.63	-0.04	0.2	0.93	0.680082	0.06	-0.1	1.24
720	288558806	P56945	BCAR1	Breast cancer anti-estrogen resistance protein 1	870	93.3	5.67		1.082	1.009	1.036	0.985	1.318	0.98	0.988	0.96	0.93	0.995	1.036	1.068	1.011	0.946	0.996	0.976	1.021	0.889		1.042	1.094	0.959	1.033	0.984	0.962		1.08	0.395679	0.14	0.12	0.85	1.14	0.185457	0.33	0.19	0.49	1	0.0505383	0.96	0	0.02
721	1730068	P10398	ARAF	Serine/threonine-protein kinase A-Raf	606	67.5	9.01		0.909	0.914	0.956	0.922	0.761	0.972	0.935	1.015	1.028	0.946	1.01	0.965	1.029	1.029	1.045	0.947	0.916	1.072		0.926	0.885	0.993	0.974	1.034	0.978		0.95	0.167941	0.36	-0.08	0.45	0.9	0.198926	0.31	-0.14	0.51	1.01	0.0577051	0.81	0.02	0.09
722	34395524	Q92888	ARHG1	Rho guanine nucleotide exchange factor 1	912	102.4	5.66		0.941	0.919	0.939	0.957	1.054	0.917	0.954	0.897	0.944	0.942	1.049	1.035	0.974	0.973	1.031	0.932	0.969	0.957		0.933	0.976	0.931	1.009	0.992	0.953		0.98	0.306615	0.21	-0.03	0.68	1.02	0.0820835	0.61	0.03	0.21	0.98	0.173249	0.36	-0.03	0.45
723	408360250	Q9NRY4	RHG35	Rho GTPase-activating protein 35	1499	170.4	6.64		0.913	0.917	0.941	0.959	1.223	0.967	0.984	0.92	0.898	1.071	1.053	1.065	1.086	1.01	1.064	1.085	1.066	0.994		0.924	1.05	0.934	1.063	1.053	1.048		0.88	0.967572	0.01	-0.18	1.9	1	0.0500514	0.99	0	0.01	0.89	0.785327	0.04	-0.17	1.41
724	23396463	O96019	ACL6A	Actin-like protein 6A	429	47.4	5.6		0.993	1.016	1.021	1.062	0.983	1.03	0.992	0.975	1.024	0.985	1	0.989	1.016	1.033	1.02	0.981	1.051	0.927		1.01	1.025	0.997	0.992	1.023	0.986		1.02	0.0955918	0.56	0.03	0.25	1.04	0.141041	0.42	0.06	0.38	1.01	0.0586484	0.8	0.02	0.1
725	205371758	Q9UBN7	HDAC6	Histone deacetylase 6	1215	131.3	5.3		1.006	0.944	1.05	0.932	0.946	0.98	0.923	0.949	0.995	0.909	1.009	1.091	1.023	0.986	1.072	0.96	0.947	0.9		1	0.953	0.956	1.003	1.027	0.936		1.07	0.389242	0.15	0.1	0.83	1.02	0.108388	0.5	0.03	0.3	1.02	0.105768	0.51	0.03	0.29
726	30913097	Q8WUI4	HDAC7	Histone deacetylase 7	952	102.9	7.58		1.083	1.029	1.017	1.04	1.185	0.957	1.026	0.87	0.975	1.178	0.803	0.869	0.892	1.186	1.233	1.001	1.262	1.366		1.043	1.061	0.957	0.95	1.104	1.209		0.86	0.294123	0.21	-0.21	0.68	0.88	0.197044	0.31	-0.19	0.51	0.79	0.511468	0.1	-0.34	1.01
727	2494891	Q16576	RBBP7	Histone-binding protein RBBP7	425	47.8	5.05		1.028	0.993	0.971	0.966	1.26	0.989	1.033	0.967	1.004	0.992	1.007	1.048	1.054	1.003	1.006	0.951	0.997	0.903		0.998	1.072	1.001	1.016	1.021	0.95		1.05	0.295998	0.21	0.07	0.68	1.13	0.217967	0.28	0.17	0.55	1.05	0.304812	0.2	0.08	0.71
728	259016275	Q13330	MTA1	Metastasis-associated protein MTA1	715	80.7	9.26		0.885	1.008	0.958	1.047	1.007	1.02	0.97	1.002	0.952	1.008	1.092	1.089	1.165	1.118	1.161	1.165	1.138	1.101		0.95	1.024	0.975	1.063	1.148	1.134		0.84	0.982015	0.01	-0.26	2	0.9	0.992869	0.01	-0.15	2.13	0.86	0.999935	0	-0.22	2.61
729	29840793	O94776	MTA2	Metastasis-associated protein MTA2	668	75	9.66		0.963	1.008	0.988	1.019	0.905	1.005	1.015	1.014	1.033	0.978	0.963	0.986	0.974	0.993	0.965	1.025	1.014	0.943		0.986	0.976	1.021	0.975	0.977	0.994		0.99	0.0582393	0.81	-0.01	0.09	0.98	0.0678116	0.71	-0.03	0.15	1.03	0.163585	0.37	0.04	0.43
730	50400820	O95983	MBD3	Methyl-CpG-binding domain protein 3	291	32.8	5.34		1.006	1.069	0.984	0.999	0.909	1.064	0.957	1.06	1.055	1.052	0.997	0.927	0.977	1.147	1	1.096	0.971	1.131		1.02	0.991	1.024	0.992	1.041	1.066		0.96	0.126302	0.44	-0.06	0.35	0.93	0.189952	0.32	-0.11	0.5	0.96	0.104734	0.51	-0.06	0.29
731	50401198	Q9UBB5	MBD2	Methyl-CpG-binding domain protein 2	411	43.2	10.04		0.915	0.999	0.96	0.955	0.963	1.052	0.913	0.948	0.89	0.929	1.031	1.026	0.945	0.85	0.95	0.894	0.91	0.85		0.958	0.99	0.917	0.995	0.915	0.885		1.08	0.609002	0.07	0.11	1.15	1.12	0.76328	0.04	0.16	1.37	1.04	0.233796	0.26	0.05	0.59
732	88911273	Q12873	CHD3	Chromodomain-helicase-DNA-binding protein 3	2000	226.4	7.3		1.016	0.819	0.987	0.938	1.291	0.878	0.839	0.925	0.852	0.9	1.018	0.875	0.829	0.765	0.923	0.813	0.874	0.767		0.941	1.036	0.872	0.931	0.839	0.818		1.15	0.38841	0.15	0.2	0.83	1.27	0.339984	0.18	0.34	0.75	1.07	0.239135	0.26	0.09	0.59
733	311033360	Q14839	CHD4	Chromodomain-helicase-DNA-binding protein 4	1912	217.9	5.86		0.999	1.061	1.006	1.032	0.958	0.99	1.02	0.981	1.007	0.979	0.977	1.021	1.008	0.988	1.014	1.049	1.037	1.004		1.022	0.993	1.003	0.992	1.003	1.03		0.99	0.0621078	0.75	-0.01	0.13	0.96	0.281554	0.22	-0.05	0.66	0.97	0.301841	0.19	-0.04	0.71
734	74762776	Q9UKL0	RCOR1	REST corepressor 1	482	53	7.03		0.906	0.917	0.907	1.013	0.762	0.961	0.991	0.948	0.927	0.946	0.909	0.925	0.939	1.082	0.947	1.114	0.944	1.282		0.91	0.912	0.956	0.927	0.989	1.113		0.82	0.490707	0.11	-0.29	0.97	0.82	0.332096	0.18	-0.29	0.74	0.86	0.318612	0.19	-0.22	0.73
735	51315808	O60341	KDM1A	Lysine-specific histone demethylase 1A	852	92.8	6.52		0.972	0.999	1.018	0.985	0.963	0.95	1.025	0.914	0.936	1.097	1.012	0.991	1.026	0.906	1.031	0.965	1.061	0.91		0.996	0.966	0.958	1.034	0.988	0.979		1.02	0.064557	0.73	0.03	0.14	0.99	0.0588033	0.8	-0.02	0.1	0.98	0.0652378	0.74	-0.03	0.13
736	47117817	O75376	NCOR1	Nuclear receptor corepressor 1	2440	270	7.11		1.009	0.998	1.011	0.918	1.125	0.974	1.014	1.017	0.918	1.139	1.088	1.139	1.055	0.919	0.999	0.944	1.023	0.98		1.006	1.006	0.983	1.122	0.991	0.982		1.02	0.166578	0.36	0.03	0.44	1.02	0.064194	0.74	0.03	0.13	1	0.0500675	0.99	0	0.01
737	23396874	Q9BZK7	TBL1R	F-box-like/WD repeat-containing protein TBL1XR1	514	55.6	5.55		0.889	0.954	0.937	1.014	0.781	1.025	0.949	1.056	0.972	0.938	0.957	0.986	0.956	0.991	0.963	1.081	0.908	0.894		0.926	0.94	0.992	0.96	0.97	0.961		0.96	0.082981	0.61	-0.05	0.21	0.98	0.0547309	0.84	-0.03	0.07	1.03	0.0720541	0.67	0.05	0.17
738	308153457	O75164	KDM4A	Lysine-specific demethylase 4A	1064	120.6	5.85		1.212	0.977	1.07	1.011	1.058	1.038	1.029	1.105	0.981	0.979	1.05	0.947	0.871	0.954	1.089	0.886	0.817	1.186		1.086	1.036	1.038	0.992	0.972	0.963		1.13	0.143948	0.4	0.17	0.39	1.08	0.0941548	0.56	0.1	0.25	1.08	0.0929099	0.56	0.11	0.25
739	37999759	Q96ST3	SIN3A	Paired amphipathic helix protein Sin3a	1273	145.1	7.25		1.05	0.912	0.979	1.072	1.126	0.961	1.162	1.138	1.122	1.067	0.997	1.036	1.033	1.1	1.036	1.022	1.075	1.145		0.98	1.053	1.141	1.033	1.056	1.081		0.91	0.423772	0.13	-0.14	0.87	0.97	0.073187	0.67	-0.04	0.17	1.06	0.325582	0.19	0.08	0.73
740	6831678	O00422	SAP18	Histone deacetylase complex subunit SAP18	153	17.5	9.35		0.988	1.068	1.072	1.043	0.905	1.019	1.107	1.06	1.032	1.022	0.963	0.941	0.976	1.037	0.988	1.066	0.997	1.134		1.043	0.989	1.067	0.975	1	1.065		0.98	0.072451	0.66	-0.03	0.18	0.93	0.236095	0.26	-0.11	0.59	1	0.0502086	0.98	0	0.01
741	74717977	Q9H0E3	SP130	Histone deacetylase complex subunit SAP130	1048	110.3	9.83		1.12	1.023	0.997	0.983	1.257	1.132	1.161	0.867	1.057	1.095	0.958	1.019	0.964	1.011	1.001	1.077	0.979	1.084		1.047	1.124	1.028	1.024	0.992	1.046		1	0.0500418	1	0	0	1.07	0.139035	0.42	0.1	0.38	0.98	0.0540392	0.85	-0.03	0.07
742	317373434	Q8NB78	KDM1B	Lysine-specific histone demethylase 1B	822	92	7.87		1.059	1.036	1.168	0.881	0.957	0.849	1.08	0.85	0.949	1.183	1.071	1.003	0.996	1.027	0.943	1.111	1.063	1.132		1.088	0.896	0.96	1.086	0.988	1.102		0.99	0.060099	0.77	-0.02	0.11	0.81	0.997346	0.01	-0.3	2.25	0.87	0.476185	0.11	-0.2	0.95
743	38257795	Q9Y2K7	KDM2A	Lysine-specific demethylase 2A	1162	132.7	7.58		0.944	0.955	1.169	1.076	0.722	0.863	0.896	0.992	0.987	0.86	0.879	0.855	0.967	0.863	0.917	0.967	0.879	0.917		1.023	0.887	0.958	0.865	0.916	0.921		1.11	0.238186	0.26	0.15	0.58	0.96	0.0609996	0.76	-0.05	0.12	1.04	0.141644	0.41	0.06	0.39
744	308153456	Q7LBC6	KDM3B	Lysine-specific demethylase 3B	1761	191.5	7.18		0.934	1.04	0.988	0.972	1.222	0.994	1.121	0.911	0.911	1.046	0.986	1.023	0.985	0.905	0.91	0.982	0.972	0.803		0.988	1.063	0.981	1.019	0.933	0.919		1.07	0.170287	0.35	0.1	0.45	1.16	0.280087	0.22	0.21	0.66	1.07	0.10017	0.53	0.09	0.27
745	215274124	P29375	KDM5A	Lysine-specific demethylase 5A	1690	192	6.49		0.821	0.721	0.549	0.55	1.028	0.952	0	0.782	0.559	1.01	0.928	0.924	1.068	0.863	0.802	0.9	0.971	0.92		0.697	0.844	0.447	0.954	0.911	0.931		0.75	0.741848	0.05	-0.42	1.33	0.91	0.0863103	0.59	-0.14	0.23	0.48	0.488315	0.11	-1.06	0.97
746	17368706	Q9BY66	KDM5D	Lysine-specific demethylase 5D	1539	174	5.85		1.095	1.05	1.105	0.965	0.896	0.964	1.07	1.02	0.978	1.073	1.01	1.016	0.971	0.996	0.951	0.986	1.092	0.956		1.083	0.942	1.023	1.033	0.973	1.011		1.07	0.330003	0.18	0.1	0.75	0.93	0.281848	0.22	-0.1	0.67	1.01	0.056382	0.82	0.02	0.09
747	215274229	O75151	PHF2	Lysine-specific demethylase PHF2	1096	120.7	9.17		1.028	0.961	0.958	1.024	1.036	1.003	1.014	1.031	0.979	0.926	0.995	1.039	0.966	0.846	1.009	0.986	0.938	0.691		0.982	1.021	1.008	0.987	0.94	0.872		1.13	0.198517	0.31	0.17	0.51	1.17	0.33214	0.18	0.23	0.74	1.16	0.28317	0.22	0.21	0.66
748	3334209	O14929	HAT1	Histone acetyltransferase type B catalytic subunit	419	49.5	5.69		0.859	1.004	0.966	1.021	0.742	1.033	0.845	0.953	0.966	0.925	1.076	1	1.068	1.1	1.027	1.059	1.185	1.021		0.943	0.932	0.921	1	1.065	1.089		0.87	0.539048	0.09	-0.21	1.04	0.86	0.282176	0.22	-0.22	0.66	0.85	0.693327	0.06	-0.24	1.25
749	115942	P21675	TAF1	Transcription initiation factor TFIID subunit 1	1872	212.5	5.07		0.936	0.885	1.02	0.874	1.105	0.931	0.937	0.933	0.927	1.026	1.017	1.017	1.006	1.005	0.902	0.946	1.058	0.999		0.947	0.97	0.932	1.02	0.971	1.001		0.95	0.172323	0.35	-0.08	0.45	0.97	0.0675276	0.71	-0.05	0.15	0.93	0.506796	0.1	-0.1	0.98
750	68565854	O95251	KAT7	Histone acetyltransferase KAT7	611	70.6	8.85		1.022	1.087	1.025	1.06	1.184	0.971	0.978	1.053	0.914	1.057	1.058	1.042	1.031	0.887	1.005	0.966	1.064	0.84		1.045	1.072	0.982	1.052	0.974	0.957		1.09	0.231132	0.27	0.13	0.57	1.12	0.229489	0.27	0.16	0.57	1.03	0.0614901	0.76	0.04	0.12
751	68565938	Q9H7Z6	KAT8	Histone acetyltransferase KAT8	458	52.4	8.27		1.027	1.037	0.983	0.926	1.151	1.013	1.145	1.033	1.033	1.063	1.016	1.008	1.052	1.076	1.048	1.132	1.01	0.997		1.016	1.03	1.07	1.029	1.058	1.046		0.97	0.0957099	0.54	-0.04	0.26	0.98	0.0544487	0.85	-0.02	0.07	1.02	0.0690373	0.69	0.03	0.16
752	145558902	Q9H9T3	ELP3	Elongator complex protein 3	547	62.2	8.88		0.927	0.97	0.977	0.967	0.946	0.927	0.966	1.01	0.937	0.921	0.92	0.947	0.902	0.941	0.901	0.935	0.868	0.88		0.958	0.947	0.971	0.929	0.915	0.894		1.07	0.627062	0.07	0.1	1.15	1.06	0.548121	0.09	0.08	1.04	1.09	0.668832	0.06	0.12	1.22
753	212276467	Q9UKN8	TF3C4	General transcription factor 3C polypeptide 4	822	91.9	6.65		1.044	1	0.967	0.969	1.104	1.039	1.094	0.97	0.989	1.013	0.974	0.894	1.116	1.014	0.851	1.008	1.093	1.057		1.004	1.037	1.018	0.96	0.993	1.053		0.95	0.285296	0.22	-0.07	0.67	0.99	0.0628802	0.75	-0.02	0.12	0.97	0.113325	0.49	-0.05	0.31
754	13626594	Q15596	NCOA2	Nuclear receptor coactivator 2	1464	159.1	6.64		1.349	1.104	1.601	1.365	1.196	1.079	1.209	1.294	1.068	1.19	1.165	1.188	1.136	1.077	1.106	1.064	1.12	0.893		1.351	1.213	1.19	1.181	1.106	1.026		1.32	0.478738	0.11	0.4	0.96	1.18	0.371805	0.16	0.24	0.81	1.16	0.367876	0.16	0.21	0.8
755	25091290	O43463	SUV91	Histone-lysine N-methyltransferase SUV39H1	412	47.9	8.03		1.112	1.039	0.907	1.039	1.157	1.022	1.016	0.918	0.954	0.947	0.971	0.974	0.979	0.801	0.838	0.919	1.003	0.859		1.019	1.073	0.963	0.964	0.873	0.927		1.1	0.222451	0.28	0.14	0.56	1.16	0.620017	0.07	0.21	1.15	1.04	0.104639	0.52	0.05	0.29
756	25091325	Q9H5I1	SUV92	Histone-lysine N-methyltransferase SUV39H2	410	46.7	8.19		1.669	1.264	0	1.228	0	0.606	0.626	0	0.739	1.583	1.192	1.082	0.925	1.291	0.99	1.538	1.107	0.838		0.978	0.611	0.455	1.285	1.069	1.161		0.84	0.0621752	0.75	-0.25	0.12	0.53	0.246598	0.25	-0.93	0.6	0.39	0.567679	0.08	-1.35	1.08
757	116241348	Q96KQ7	EHMT2	Histone-lysine N-methyltransferase EHMT2	1210	132.3	5.45		0.976	1.011	1.04	0.964	1.073	0.972	1.007	0.943	0.947	1.116	1.059	1.01	1.015	1.04	1.025	1.04	1.092	1.022		1.009	1.003	0.966	1.062	1.027	1.051		0.96	0.293561	0.21	-0.06	0.69	0.95	0.200203	0.3	-0.07	0.52	0.92	0.751983	0.04	-0.12	1.35
758	325511404	Q9H9B1	EHMT1	Histone-lysine N-methyltransferase EHMT1	1298	141.4	5.76		1.048	1.122	1.075	1.115	1.524	1.063	1.031	0.96	0.984	1.021	1.068	1.008	1.058	1.038	0.935	1.064	1.082	1.012		1.081	1.234	0.992	1.032	1.01	1.053		1.03	0.143829	0.39	0.04	0.41	1.17	0.214465	0.29	0.23	0.54	0.94	0.484593	0.11	-0.09	0.97
759	146345435	Q03164	KMT2A	Histone-lysine N-methyltransferase 2A	3969	431.5	9.09		1.121	1.04	0.984	1.031	1.074	0.944	1.081	0.962	0.993	1.033	1.081	1.011	0.949	0.795	0.969	0.928	1.011	0.841		1.049	1.017	1.012	1.042	0.904	0.927		1.13	0.438372	0.13	0.18	0.9	1.1	0.276704	0.22	0.13	0.65	1.09	0.2631	0.23	0.13	0.63
760	68052990	O15047	SET1A	Histone-lysine N-methyltransferase SETD1A	1707	185.9	5.14		0.982	1.015	0.945	0.951	0.94	1.087	1.128	0.927	1.003	0.956	1.035	0.98	0.963	0.869	1.047	0.997	0.981	0.996		0.981	0.993	1.019	0.99	0.96	0.991		0.99	0.074643	0.62	-0.02	0.2	1	0.0501884	0.98	0	0.01	1.03	0.0743171	0.66	0.04	0.18
761	117949323	Q9NR48	ASH1L	Histone-lysine N-methyltransferase ASH1L	2969	332.6	9.39		1.128	1.098	1.022	1.063	1.087	1.098	1.036	0.991	1.09	1.088	0.985	1.176	1.049	1.054	1.026	1.05	1.035	1.128		1.082	1.083	1.039	1.083	1.043	1.071		1.01	0.0570757	0.8	0.02	0.1	1.01	0.0664442	0.72	0.02	0.14	0.97	0.117207	0.48	-0.04	0.32
762	25091217	Q8WTS6	SETD7	Histone-lysine N-methyltransferase SETD7	366	40.7	4.63		1.013	0.975	0.963	0.99	1.079	1.024	0.964	1.027	1.027	1.01	1.045	1.059	1.067	1.014	1.076	1.014	0.894	1.097		0.984	1.031	1.006	1.038	1.052	1.002		0.98	0.0593596	0.78	-0.03	0.11	1.03	0.0717636	0.67	0.04	0.17	1	0.0504357	0.95	0.01	0.02
763	215273873	O95602	RPA1	DNA-directed RNA polymerase I subunit RPA1	1720	194.7	7.03		1.05	1.101	1.038	1.155	1.251	1.084	1.098	1.043	1.121	0.953	1.124	0.95	1.11	0.927	1.087	0.926	1.057	0.909		1.063	1.164	1.087	1.009	1.041	0.964		1.1	0.447395	0.12	0.14	0.92	1.21	0.775485	0.04	0.27	1.39	1.13	0.588207	0.08	0.17	1.12
764	92090637	Q9H9Y6	RPA2	DNA-directed RNA polymerase I subunit RPA2	1135	128.1	7.83		0.885	0.844	0.852	0.887	1.01	0.92	0.986	0.973	0.885	0.862	0.91	0.938	0.847	0.95	0.858	1.018	0.898	1.061		0.86	0.939	0.948	0.904	0.885	0.992		0.87	0.67486	0.06	-0.21	1.23	0.95	0.131723	0.43	-0.08	0.37	0.96	0.11188	0.49	-0.07	0.31
765	464608	P35244	RFA3	Replication protein A 14 kDa subunit	121	13.6	5.08		0.958	0.985	0.994	0.938	1.057	1.004	0.968	0.938	0.948	1.041	1.05	0.997	1.077	0.975	1.013	0.946	1.013	0.886		0.979	0.999	0.951	1.029	1.021	0.948		1.03	0.121204	0.47	0.05	0.33	1.05	0.161856	0.37	0.08	0.43	1	0.0506739	0.94	0	0.03
766	118773	P18858	DNLI1	DNA ligase 1	919	101.7	5.62		0.937	0.958	0.969	0.916	0.969	0.951	0.975	0.87	0.976	1.003	0.975	0.981	1.015	1.02	0.962	0.985	0.989	0.932		0.955	0.945	0.94	0.986	0.999	0.969		0.99	0.0997226	0.55	-0.02	0.26	0.98	0.158118	0.39	-0.04	0.41	0.97	0.107762	0.52	-0.04	0.29
767	50403732	P28340	DPOD1	DNA polymerase delta catalytic subunit	1107	123.6	7.03		1.103	1.056	1.011	1.022	1.12	0.98	1.008	0.985	0.991	0.954	0.983	1.026	0.977	0.996	0.955	0.931	0.983	0.858		1.057	1.041	0.994	0.988	0.976	0.924		1.14	0.772152	0.04	0.19	1.38	1.13	0.506543	0.1	0.17	0.99	1.08	0.42625	0.13	0.11	0.89
768	116241339	Q07864	DPOE1	DNA polymerase epsilon catalytic subunit A	2286	261.4	6.39		1.212	0.98	1.058	0.991	1.101	0.876	1.041	0.954	1.013	1.001	0.951	0.986	0.951	0.985	0.972	1.013	0.999	1.049		1.083	0.99	1.003	0.979	0.969	1.02		1.06	0.13855	0.42	0.09	0.38	0.97	0.0717339	0.67	-0.04	0.17	0.98	0.0853756	0.59	-0.03	0.23
769	729475	P39748	FEN1	Flap endonuclease 1	380	42.6	8.62		0.828	0.888	0.998	1.035	0.604	1.061	0.902	1.026	1.026	0.972	0.94	0.978	0.989	1.061	1.022	1.044	0.999	1.125		0.905	0.9	0.984	0.964	1.024	1.056		0.86	0.615344	0.07	-0.22	1.15	0.85	0.163568	0.36	-0.23	0.44	0.93	0.233855	0.26	-0.1	0.58
770	417811	Q04837	SSBP	Single-stranded DNA-binding protein, mitochondrial	148	17.2	9.6		1.066	1.042	0.953	1.019	0.823	0.968	1.078	1.047	1.038	1.091	1.032	0.976	0.994	0.958	1.004	1.021	1.03	0.987		1.02	0.937	1.054	1.033	0.986	1.013		1.01	0.0538636	0.85	0.01	0.07	0.92	0.223765	0.27	-0.11	0.56	1.04	0.567789	0.08	0.06	1.09
771	60392197	P09884	DPOLA	DNA polymerase alpha catalytic subunit	1462	165.8	5.85		1.005	0.992	0.975	1.023	1.083	0.993	0.974	0.956	0.998	0.971	0.946	0.95	0.967	0.929	1.066	0.977	0.956	0.963		0.991	1.033	0.976	0.956	0.988	0.965		1.03	0.616051	0.07	0.04	1.14	1.07	0.636946	0.07	0.1	1.18	1.01	0.12044	0.47	0.02	0.33
772	1346792	P49642	PRI1	DNA primase small subunit	420	49.9	8.21		1.003	1.018	1.018	0.994	1.003	1.027	0.962	0.966	1.016	0.982	1.014	1.046	1.083	1.167	1.083	1.091	1.031	1.062		1.013	1.008	0.981	1.014	1.111	1.061		0.95	0.687597	0.06	-0.07	1.25	0.95	0.686833	0.06	-0.07	1.25	0.92	0.842247	0.03	-0.11	1.51
773	51338777	P49643	PRI2	DNA primase large subunit	509	58.8	7.91		0.88	0.948	0.987	0.984	0.73	0.989	0.951	1.043	0.87	1.004	1.006	1.03	1.021	1.018	1.024	0.958	1.008	0.96		0.938	0.901	0.955	1.013	1.021	0.975		0.96	0.169744	0.36	-0.06	0.45	0.92	0.128364	0.44	-0.11	0.36	0.98	0.0654904	0.71	-0.03	0.15
774	1352307	P49005	DPOD2	DNA polymerase delta subunit 2	469	51.3	5.58		1.024	1.007	0.996	0.948	1.093	0.916	0.899	1.029	0.895	1.081	1.066	1.006	1.061	0.986	1.038	0.997	0.934	0.947		1.009	0.986	0.941	1.051	1.028	0.959		1.05	0.60161	0.07	0.07	1.13	1.03	0.0734603	0.67	0.04	0.17	0.98	0.0650396	0.72	-0.03	0.14
775	17375506	Q15054	DPOD3	DNA polymerase delta subunit 3	466	51.4	9.35		1.007	1.049	1.039	0.989	1.168	0.973	0.978	0.979	0.986	1.054	1.036	1.001	0.998	1.003	0.985	0.976	1.072	1.011		1.031	1.043	0.981	1.03	0.996	1.019		1.01	0.0662794	0.71	0.02	0.15	1.02	0.0631294	0.74	0.03	0.13	0.96	0.247864	0.24	-0.06	0.62
776	22653710	Q9NRF9	DPOE3	DNA polymerase epsilon subunit 3	147	16.8	4.74		0.95	1.017	1.049	0.985	0.629	1.083	0.905	0.988	1	0.924	0.933	1.087	0.937	1.017	1.02	1.001	0.905	0.913		1.006	0.899	0.964	0.981	0.991	0.94		1.07	0.311282	0.19	0.1	0.71	0.96	0.0589937	0.79	-0.06	0.1	1.03	0.083716	0.6	0.04	0.23
777	1350579	P27694	RFA1	Replication protein A 70 kDa DNA-binding subunit	616	68.1	7.21		0.978	1	1.018	1.017	0.986	1.042	0.996	0.969	1.021	0.994	1.007	0.992	1.016	1.041	1.062	1.042	1.023	1.051		0.999	1.015	0.995	0.998	1.04	1.039		0.96	0.732923	0.05	-0.06	1.32	0.98	0.239558	0.27	-0.03	0.57	0.96	0.658067	0.06	-0.06	1.19
778	132474	P15927	RFA2	Replication protein A 32 kDa subunit	270	29.2	6.15		0.913	0.915	0.959	1.004	0.731	0.973	0.964	1.055	0.996	1.014	0.946	1.026	1.077	1.134	1.031	1.083	0.955	1.18		0.929	0.902	1.005	0.995	1.081	1.073		0.87	0.517078	0.1	-0.21	1.01	0.84	0.319093	0.19	-0.25	0.72	0.94	0.151452	0.39	-0.09	0.41
779	56757608	P35251	RFC1	Replication factor C subunit 1	1148	128.2	9.36		1.018	0.998	0.93	0.932	0.87	0.923	0.985	0.98	0.933	1.007	0.997	0.977	0.979	0.942	0.924	1.013	1.019	0.915		0.982	0.908	0.966	0.994	0.949	0.982		1	0.05	0.99	0	0	0.92	0.428738	0.13	-0.11	0.89	0.98	0.0694492	0.69	-0.02	0.16
780	1703052	P35249	RFC4	Replication factor C subunit 4	363	39.7	8.02		0.974	0.976	0.955	0.961	0.817	0.977	0.981	0.956	1.03	1	0.899	0.978	1.019	1.041	0.983	1.098	1.017	1.182		0.968	0.918	0.989	0.959	1.014	1.099		0.88	0.706176	0.05	-0.18	1.28	0.84	0.667282	0.06	-0.26	1.22	0.9	0.498427	0.1	-0.15	0.99
781	2507300	P35250	RFC2	Replication factor C subunit 2	354	39.1	6.44		0.862	0.947	0.946	0.965	0.849	0.983	0.959	1.012	1.053	0.959	0.87	0.938	0.919	1.074	0.921	1.073	0.963	1.3		0.919	0.932	1.008	0.922	0.971	1.112		0.83	0.417257	0.13	-0.28	0.87	0.84	0.348493	0.17	-0.25	0.77	0.91	0.161186	0.37	-0.14	0.43
782	728777	P40937	RFC5	Replication factor C subunit 5	340	38.5	7.2		1.034	1.033	0.986	1.036	0.921	0.972	1.028	1.051	0.961	1.07	1.04	1.042	0.991	1.005	0.983	0.981	1.022	1.008		1.018	0.976	1.013	1.051	0.993	1.004		1.01	0.103533	0.52	0.02	0.28	0.97	0.117843	0.48	-0.04	0.32	1.01	0.0599104	0.78	0.01	0.11
783	3915601	P40938	RFC3	Replication factor C subunit 3	356	40.5	8.34		1.128	1.147	1.045	1.137	0.965	1.102	1.018	1.047	1.248	1.087	0.979	1.032	0.963	1.013	0.973	1.079	1.031	1.092		1.107	1.068	1.104	1.033	0.983	1.067		1.04	0.181519	0.34	0.05	0.47	1	0.0500344	0.99	0	0.01	1.03	0.0763727	0.65	0.05	0.19
784	20981704	O75792	RNH2A	Ribonuclease H2 subunit A	299	33.4	5.25		0.982	0.893	1.005	0.97	0.784	1.028	0.966	1.063	1.087	1.007	1.037	1.079	1.005	1.03	1.021	0.931	0.951	1.024		0.96	0.928	1.039	1.041	1.019	0.969		0.99	0.0543978	0.85	-0.01	0.07	0.96	0.0790634	0.63	-0.06	0.2	1.07	0.294372	0.21	0.1	0.68
785	206729922	P29372	3MG	DNA-3-methyladenine glycosylase	298	32.8	9.57		1.008	1.065	1.215	1.124	1.097	1.036	1.012	1.041	1.088	0.945	0.938	0.998	0.977	0.975	0.976	0.96	0.998	1.12		1.096	1.086	1.047	0.96	0.976	1.026		1.07	0.136643	0.42	0.1	0.38	1.06	0.180387	0.34	0.08	0.47	1.02	0.0667505	0.71	0.03	0.15
786	113984	P27695	APEX1	DNA-(apurinic or apyrimidinic site) lyase	318	35.5	8.12		1.001	0.987	1.022	1.045	0.965	1.046	1.027	0.986	1.025	0.968	1.018	1.008	1.038	0.97	1.061	0.919	1.026	0.878		1.003	1.019	1.012	0.998	1.023	0.941		1.07	0.253696	0.24	0.09	0.62	1.08	0.296493	0.21	0.12	0.69	1.08	0.305942	0.2	0.11	0.71
787	251757259	P49916	DNLI3	DNA ligase 3	1009	112.8	9.01		1.165	1.179	1.057	1.014	1.221	0.986	1.053	1.042	1.03	0.989	1.017	1.042	0.957	1.059	0.985	1.008	0.986	1.005		1.134	1.074	1.042	1.016	1.001	1		1.13	0.872981	0.03	0.18	1.57	1.07	0.157533	0.38	0.1	0.42	1.04	0.974248	0.01	0.06	1.91
788	317373290	P18887	XRCC1	DNA repair protein XRCC1	633	69.4	6.39		1.004	0.998	1.007	0.913	1.077	0.91	0.961	1.005	0.929	0.996	1.006	0.977	0.992	0.914	0.947	0.98	0.976	0.953		1.003	0.967	0.965	0.993	0.951	0.97		1.03	0.92069	0.02	0.05	1.71	1	0.0503079	0.96	0	0.02	0.99	0.054797	0.84	-0.01	0.07
789	50401132	Q96T60	PNKP	Bifunctional polynucleotide phosphatase/kinase	521	57	8.46		0.943	1.029	0.938	1.014	1.266	0.935	1.082	1.04	0.933	1.186	1.086	1.091	0.951	0.89	1.029	0.877	0.997	0.863		0.97	1.071	1.018	1.121	0.957	0.912		1.06	0.186675	0.33	0.09	0.49	1.17	0.282525	0.22	0.23	0.67	1.12	0.366785	0.16	0.16	0.8
790	123369	P09429	HMGB1	High mobility group protein B1	215	24.9	5.74		0.9	0.957	0.963	1.034	0.881	1.117	0.962	1.07	0.993	0.991	1.006	1	1.024	1.073	1.087	1.023	0.986	0.955		0.94	1.011	1.008	0.999	1.061	0.988		0.95	0.361182	0.16	-0.07	0.8	1.02	0.0609528	0.77	0.03	0.11	1.02	0.0803411	0.62	0.03	0.21
791	296453081	Q01831	XPC	DNA repair protein complementing XP-C cells	940	105.9	8.9		1.049	0.955	0.972	1.033	0.97	1.068	1.015	0.875	0.918	1.038	0.991	0.927	0.97	0.994	0.974	1.076	0.966	1.124		0.992	1.024	0.936	0.985	0.979	1.055		0.94	0.192988	0.32	-0.09	0.5	0.97	0.0843613	0.6	-0.04	0.22	0.89	0.429156	0.13	-0.17	0.89
792	1709985	P54727	RD23B	UV excision repair protein RAD23 homolog B	409	43.1	4.84		0.803	0.86	0.95	1.04	0.549	1.084	0.866	1.051	1.01	0.896	0.948	0.992	0.999	1.201	1.024	1.088	0.977	1.283		0.871	0.891	0.976	0.945	1.075	1.116		0.78	0.626448	0.07	-0.36	1.16	0.8	0.197435	0.31	-0.32	0.51	0.87	0.24121	0.26	-0.19	0.59
793	1709983	P54725	RD23A	UV excision repair protein RAD23 homolog A	363	39.6	4.58		0.896	0.889	0.999	1.018	0.517	0.978	0.88	1.02	1.078	0.871	1.009	0.966	0.935	0.973	0.977	0.936	0.96	0.989		0.928	0.838	0.992	0.948	0.962	0.962		0.97	0.133696	0.44	-0.05	0.36	0.87	0.113824	0.49	-0.2	0.31	1.03	0.0762	0.64	0.05	0.2
794	12643730	Q16531	DDB1	DNA damage-binding protein 1	1140	126.9	5.26		0.944	0.991	0.966	0.988	0.838	0.994	0.973	0.983	0.989	0.967	0.994	0.994	0.999	1.085	0.988	1.064	1.005	1.085		0.967	0.94	0.982	0.985	1.024	1.052		0.92	0.804025	0.04	-0.12	1.43	0.89	0.458006	0.12	-0.16	0.93	0.93	0.748031	0.05	-0.1	1.33
795	119541	P19447	ERCC3	TFIIH basal transcription factor complex helicase XPB subunit	782	89.2	7.23		1.061	0.969	1.033	0.949	1.224	0.94	0.933	0.922	1.008	1.03	0.931	0.943	0.957	0.894	0.984	0.945	1.011	0.859		1.021	1.037	0.954	0.968	0.945	0.938		1.09	0.326432	0.18	0.12	0.73	1.11	0.150306	0.39	0.14	0.41	1.02	0.0602621	0.77	0.02	0.11
796	1708932	P51948	MAT1	CDK-activating kinase assembly factor MAT1	309	35.8	6.09		0.929	0.78	0.91	1.059	1.025	0.916	0.859	1.006	0.957	1.073	1.02	1.074	0.993	0.971	1.059	0.924	0.993	0.896		0.873	1	0.941	1.056	1.008	0.937		0.93	0.19758	0.31	-0.1	0.51	1.07	0.210616	0.29	0.09	0.53	1	0.0506319	0.95	0	0.02
797	229463004	Q92889	XPF	DNA repair endonuclease XPF	916	104.4	6.93		1.125	0.983	1.059	0.876	1.383	0.912	0.927	0.982	0.893	0.984	0.889	0.902	0.851	0.913	0.883	0.871	0.981	0.994		1.056	1.057	0.934	0.925	0.882	0.949		1.11	0.423817	0.13	0.15	0.88	1.11	0.0946079	0.55	0.16	0.26	0.98	0.0609622	0.77	-0.02	0.11
798	25091548	Q9HCS7	SYF1	Pre-mRNA-splicing factor SYF1	855	99.9	6.23		0.937	0.943	0.946	0.996	0.807	0.98	0.965	0.959	0.999	0.993	1.065	1	0.986	0.907	0.964	1.009	0.963	0.957		0.942	0.928	0.974	1.019	0.952	0.977		0.96	0.499441	0.11	-0.05	0.97	0.95	0.116128	0.48	-0.07	0.32	1	0.0522584	0.91	0	0.04
799	150421597	Q96T76	MMS19	MMS19 nucleotide excision repair protein homolog	1030	113.2	6.35		0.984	0.961	1.006	0.951	1.164	0.898	0.927	0.95	0.942	1.067	1.076	0.961	1.011	1.007	0.937	1.014	1.032	1.055		0.983	1.004	0.94	1.035	0.985	1.034		0.95	0.756075	0.05	-0.07	1.33	0.97	0.0642733	0.74	-0.04	0.13	0.91	0.999961	0	-0.14	2.63
800	296439468	Q13620	CUL4B	Cullin-4B	913	103.9	7.37		1.119	1.049	1.077	1.045	1.126	1.086	1.009	1.02	1.022	1.058	1.021	1.041	1.036	0.977	1.06	0.937	1.078	0.882		1.082	1.086	1.017	1.04	1.024	0.966		1.12	0.419165	0.13	0.16	0.87	1.12	0.430318	0.13	0.17	0.89	1.05	0.132458	0.43	0.07	0.36
801	1171032	P43246	MSH2	DNA mismatch repair protein Msh2	934	104.7	5.77		0.964	0.988	0.998	1.049	0.921	1.032	0.969	0.998	1.02	0.983	1.034	1.014	1.011	1.026	1.01	0.966	1.026	1.002		0.983	1.001	0.995	1.01	1.016	0.998		0.99	0.109975	0.5	-0.02	0.3	1	0.0505008	0.96	0	0.02	1	0.0518376	0.91	0	0.04
802	68067672	P52701	MSH6	DNA mismatch repair protein Msh6	1360	152.7	6.9		1.04	1	0.997	1.022	0.994	1.007	0.971	0.979	0.975	0.922	0.933	1.037	1.039	0.959	1.005	1.066	0.984	0.964		1.012	1.008	0.975	0.964	1.001	1.005		1.01	0.0544842	0.84	0.01	0.08	1	0.0509229	0.93	0	0.03	0.97	0.149933	0.4	-0.04	0.4
803	1705486	P54132	BLM	Bloom syndrome protein	1417	158.9	7.49		1.03	0.921	1.025	0.935	0.917	0.974	0.966	0.898	0.86	1.021	1.011	0.973	1.017	0.981	1.018	1.113	1.015	1.258		0.992	0.942	0.908	1.002	1.006	1.129		0.88	0.369731	0.16	-0.19	0.8	0.83	0.660965	0.06	-0.26	1.21	0.8	0.74733	0.05	-0.31	1.34
804	2501242	Q13472	TOP3A	DNA topoisomerase 3-alpha	1001	112.3	8.34		0.885	0.939	0.903	1.1	0.86	0.985	1.026	0.966	0.935	1.016	0.951	0.931	0.939	0.963	1.002	1.017	0.923	1.106		0.909	0.982	0.976	0.966	0.968	1.015		0.9	0.434874	0.13	-0.16	0.9	0.97	0.0653517	0.72	-0.05	0.14	0.96	0.0968225	0.54	-0.06	0.27
805	38258929	P78527	PRKDC	DNA-dependent protein kinase catalytic subunit	4128	468.8	7.12		0.989	1.02	0.96	0.993	0.965	1.005	1.033	0.99	1.004	1.039	0.991	0.987	0.987	0.982	0.993	1.03	1.027	1.059		0.99	0.988	1.009	1.006	0.987	1.038		0.95	0.598361	0.07	-0.07	1.14	0.95	0.828842	0.03	-0.07	1.48	0.97	0.38672	0.15	-0.04	0.83
806	44888352	Q13426	XRCC4	DNA repair protein XRCC4	336	38.3	4.98		1.147	1.053	1.006	1.009	1.254	0.979	1.099	1.001	1.037	1.006	1.009	1.026	0.927	1.002	0.886	0.892	0.963	0.912		1.069	1.081	1.046	1.014	0.938	0.922		1.16	0.820495	0.03	0.21	1.46	1.17	0.383523	0.15	0.23	0.82	1.13	0.88373	0.03	0.18	1.59
807	125731	P13010	XRCC5	X-ray repair cross-complementing protein 5	732	82.7	5.81		0.972	1.004	0.99	1.017	0.906	0.995	1.018	0.996	1.045	1.01	1.009	0.99	1.007	1.007	0.999	1.024	1.021	1.071		0.989	0.973	1.02	1.003	1.004	1.038		0.95	0.676742	0.06	-0.07	1.25	0.94	0.368082	0.16	-0.09	0.81	0.98	0.125895	0.43	-0.03	0.36
808	125729	P12956	XRCC6	X-ray repair cross-complementing protein 6	609	69.8	6.64		0.962	0.991	0.984	1.033	0.848	1.041	1.023	1.014	1.033	0.977	0.949	0.944	0.988	1.039	0.981	1.049	0.988	1.123		0.979	0.974	1.024	0.957	1.003	1.053		0.93	0.409878	0.14	-0.11	0.86	0.92	0.173596	0.35	-0.11	0.46	0.97	0.108538	0.5	-0.04	0.3
809	1706762	Q00597	FANCC	Fanconi anemia group C protein	558	63.4	6.15		0.981	0.923	0.952	0.986	1.208	0.851	0.951	0.976	0.921	1.132	1.04	1	1.016	0.85	0.979	1.008	1.093	0.747		0.952	1.015	0.949	1.058	0.948	0.95		1	0.0500383	0.98	0	0.01	1.07	0.0709079	0.68	0.1	0.17	1	0.0500096	1	0	0
810	57012613	Q9BX63	FANCJ	Fanconi anemia group J protein	1249	140.8	6.92		0.95	0.904	0.926	0.925	0.988	0.877	0.812	0.753	0.781	0.865	0.919	0.885	0.964	0.893	1.104	0.914	0.94	1.218		0.927	0.93	0.782	0.889	0.987	1.024		0.9	0.156145	0.38	-0.14	0.42	0.91	0.14143	0.41	-0.14	0.39	0.76	0.619471	0.07	-0.39	1.15
811	166987394	Q9Y4R8	TELO2	Telomere length regulation protein TEL2 homolog	837	91.7	5.76		0.809	0.877	0.926	0.967	0.842	0.977	0.878	0.887	0.89	0.916	0.906	0.933	0.971	1.155	1.012	1.213	0.94	1.428		0.87	0.929	0.885	0.918	1.046	1.194		0.73	0.544332	0.09	-0.46	1.05	0.78	0.390325	0.15	-0.36	0.83	0.74	0.529062	0.09	-0.43	1.03
812	74760390	Q8TAF3	WDR48	WD repeat-containing protein 48	677	76.2	7.03		1.054	1.048	1.065	1.043	1.274	1.023	1.056	1.06	0.989	0.994	1.025	1.017	0.989	0.77	0.977	0.807	1.1	0.68		1.055	1.113	1.035	1.012	0.912	0.862		1.22	0.309226	0.2	0.29	0.71	1.29	0.356325	0.17	0.37	0.78	1.2	0.253241	0.24	0.26	0.61
813	73622065	Q9NPD8	UBE2T	Ubiquitin-conjugating enzyme E2 T	197	22.5	7.99		0.945	0.946	1.013	0.97	1.026	0.998	0.97	0.994	0.934	1.036	1.066	1.09	0.989	1.031	1.029	0.947	1.012	0.893		0.968	0.998	0.966	1.064	1.016	0.951		1.02	0.0683253	0.7	0.03	0.16	1.05	0.216478	0.28	0.07	0.55	1.02	0.0661979	0.71	0.02	0.15
814	322510109	Q9H9A7	RMI1	RecQ-mediated genome instability protein 1	625	70.1	4.96		1.092	1.075	0.932	0.969	1.291	1.01	1	0.982	1.102	1.139	1.044	0.94	0.951	1.166	0.883	1.043	1.105	1.318		1.033	1.09	1.028	1.041	1	1.155		0.89	0.22039	0.28	-0.16	0.55	0.94	0.076415	0.64	-0.08	0.19	0.89	0.260142	0.24	-0.17	0.63
815	74731517	Q96E14	RMI2	RecQ-mediated genome instability protein 2	147	15.9	7.9		1.041	0.889	1.067	1.016	0.854	1.044	0.901	1.003	1.05	1.222	1.053	1.052	1.109	1.129	1.103	1.258	1.097	1.139		0.999	0.972	0.985	1.109	1.114	1.165		0.86	0.553646	0.09	-0.22	1.06	0.83	0.6449	0.06	-0.26	1.19	0.85	0.716473	0.05	-0.24	1.3
816	229462842	Q13111	CAF1A	Chromatin assembly factor 1 subunit A	956	106.9	5.94		1.093	1.022	1.051	0.961	1.343	0.972	1.09	0.924	0.916	1.004	0.997	0.931	0.976	0.987	0.963	1.029	1.079	0.956		1.055	1.092	0.977	0.977	0.975	1.022		1.03	0.119385	0.46	0.05	0.33	1.07	0.0809223	0.62	0.1	0.21	0.96	0.0986584	0.54	-0.06	0.27
817	47606216	Q9NSU2	TREX1	Three-prime repair exonuclease 1	369	38.9	8.41		0.861	0.599	0.831	0.865	0.629	0.685	0.867	0.992	0.711	1.052	1.173	1.337	1.268	1.254	1.018	1.266	1.15	1.481		0.764	0.726	0.857	1.187	1.18	1.299		0.59	0.963095	0.01	-0.77	1.86	0.56	0.987885	0.01	-0.84	2.05	0.66	0.885071	0.03	-0.6	1.6
818	254763430	P36639	8ODP	7,8-dihydro-8-oxoguanine triphosphatase	197	22.5	5.27		0.907	0.964	1.095	0.963	0.794	0.97	0.931	0.956	1.116	0.926	0.987	0.932	1.048	1.172	1.006	1.034	0.921	1.2		0.989	0.909	1.001	0.948	1.075	1.051		0.94	0.0928891	0.56	-0.09	0.25	0.86	0.271366	0.22	-0.21	0.65	0.95	0.0770586	0.64	-0.07	0.19
819	347595814	P33316	DUT	Deoxyuridine 5'-triphosphate nucleotidohydrolase, mitochondrial	252	26.5	9.36		0.903	1.007	1.043	1.006	0.987	1.012	0.968	0.976	0.969	0.956	0.961	1.011	1	1.034	1.068	0.994	1.023	1.045		0.985	1.002	0.971	0.976	1.034	1.021		0.96	0.120926	0.46	-0.05	0.33	0.98	0.193044	0.32	-0.03	0.5	0.95	0.857423	0.03	-0.07	1.52
820	33518639	P49459	UBE2A	Ubiquitin-conjugating enzyme E2 A	152	17.3	5.15		0.98	1.071	1.099	1.089	0.95	1.08	1.08	1.093	1.046	0.936	0.99	1.053	0.951	1.24	1.036	1.08	1.092	1.309		1.05	1.04	1.073	0.993	1.075	1.16		0.9	0.242674	0.25	-0.14	0.6	0.9	0.256985	0.24	-0.16	0.63	0.92	0.193787	0.31	-0.11	0.51
821	313104165	Q9NS91	RAD18	E3 ubiquitin-protein ligase RAD18	495	56.2	7.58		1.017	0.928	0.93	0.923	1.2	0.938	0.977	0.907	0.862	0.963	1.006	0.911	0.958	0.881	0.996	0.937	1.01	0.905		0.958	1.02	0.915	0.96	0.945	0.951		1.01	0.0528613	0.87	0.01	0.06	1.07	0.106844	0.51	0.1	0.3	0.96	0.117317	0.48	-0.05	0.32
822	51701935	Q15819	UB2V2	Ubiquitin-conjugating enzyme E2 variant 2	145	16.4	8.09		0.891	0.894	1.055	1.079	0.915	1.054	1.012	0.871	1.051	0.986	0.979	1.048	1.076	1.148	0.984	1.072	0.93	1.236		0.947	1.016	0.978	1.004	1.07	1.079		0.88	0.226386	0.27	-0.19	0.57	0.94	0.0910517	0.57	-0.09	0.24	0.91	0.152659	0.39	-0.14	0.41
823	46577660	P61088	UBE2N	Ubiquitin-conjugating enzyme E2 N	152	17.1	6.57		0.955	0.959	1.017	1.018	0.836	1.023	0.958	1.017	1.015	0.939	1	1.028	1.036	1.027	1.048	0.925	0.979	0.953		0.977	0.959	0.996	0.989	1.037	0.952		1.03	0.155484	0.39	0.04	0.41	1.01	0.0512967	0.92	0.01	0.04	1.05	0.382501	0.15	0.07	0.82
824	68565390	Q14676	MDC1	Mediator of DNA damage checkpoint protein 1	2089	226.5	5.47		1.017	0.997	0.959	0.963	1.118	0.968	1.014	0.976	1.055	1.058	0.986	0.988	1	0.975	0.991	1.002	1.042	0.973		0.991	1.016	1.015	1.011	0.989	1.006		0.99	0.0851206	0.6	-0.02	0.22	1.01	0.0535719	0.85	0.02	0.07	1.01	0.0594041	0.76	0.01	0.12
825	8928568	Q12888	TP53B	Tumor suppressor p53-binding protein 1	1972	213.4	4.7		1.106	1.055	1.037	1.004	1.195	1.059	1.069	1.031	1.103	1.063	0.993	0.951	0.981	0.952	0.941	0.985	0.964	1.059		1.066	1.086	1.068	1.003	0.958	1.003		1.06	0.384496	0.15	0.09	0.82	1.08	0.234925	0.26	0.12	0.58	1.06	0.402631	0.14	0.09	0.84
826	68565701	Q5UIP0	RIF1	Telomere-associated protein RIF1	2472	274.3	5.52		1.061	1.041	1.083	1.056	1.218	0.948	1.088	1.033	1.045	1.05	1.009	0.94	0.942	0.865	0.945	0.984	1.019	0.929		1.062	1.074	1.056	1	0.917	0.977		1.09	0.768319	0.04	0.12	1.36	1.1	0.199786	0.31	0.14	0.51	1.08	0.650078	0.07	0.11	1.18
827	55976619	Q9UMS4	PRP19	Pre-mRNA-processing factor 19	504	55.1	6.61		1.033	1.022	0.999	1.007	1.068	0.967	1.076	1.075	1.04	1.027	1.016	0.954	0.971	0.926	0.948	0.955	1.02	0.903		1.018	1.014	1.064	0.999	0.948	0.959		1.06	0.348785	0.17	0.09	0.77	1.06	0.214061	0.29	0.08	0.54	1.11	0.764051	0.04	0.15	1.36
828	218512113	P46063	RECQ1	ATP-dependent DNA helicase Q1	649	73.4	7.88		0.972	1.009	0.984	1.012	0.987	0.988	0.976	0.997	1.021	1.003	1.016	1.006	1.005	1.001	1.019	1.003	1.002	0.961		0.988	0.996	0.998	1.009	1.008	0.989		1	0.0503435	0.99	0	0	1.01	0.0703438	0.67	0.01	0.17	1.01	0.074117	0.65	0.01	0.18
829	12644118	P11387	TOP1	DNA topoisomerase 1	765	90.7	9.31		0.986	1.051	0.998	1.014	0.767	0.986	1.013	1.022	1.022	1.003	0.975	0.984	0.993	1.005	0.966	1.06	1.022	1.062		1.012	0.922	1.019	0.987	0.988	1.048		0.97	0.296447	0.21	-0.05	0.69	0.88	0.322426	0.19	-0.18	0.73	0.97	0.523426	0.1	-0.04	1
830	13959709	P11388	TOP2A	DNA topoisomerase 2-alpha	1531	174.3	8.72		0.96	0.993	0.976	0.997	0.871	1.002	0.986	0.962	0.986	1.019	0.994	0.962	0.967	0.963	0.963	1.05	1.033	1.027		0.976	0.957	0.978	0.991	0.964	1.037		0.94	0.995318	0.01	-0.09	2.13	0.92	0.407391	0.14	-0.12	0.85	0.94	0.998253	0.01	-0.08	2.28
831	20141946	Q02880	TOP2B	DNA topoisomerase 2-beta	1626	183.2	8		1.055	1.115	0.991	1.052	0.865	1.015	1.073	0.998	1.049	1.02	1.002	0.984	1.018	1.014	0.876	1.033	1.013	0.996		1.053	0.977	1.04	1.002	0.97	1.014		1.04	0.16859	0.35	0.06	0.46	0.96	0.0936311	0.56	-0.05	0.25	1.03	0.171982	0.35	0.04	0.46
832	30173484	Q9H0D6	XRN2	5'-3' exoribonuclease 2	950	108.5	7.47		1.012	1.036	0.954	0.997	0.905	1.014	0.974	0.985	0.988	1.032	1.035	0.992	1.01	0.971	0.991	1.028	1.017	0.977		1	0.972	0.982	1.02	0.991	1.008		0.99	0.0582117	0.82	-0.01	0.09	0.96	0.15164	0.39	-0.05	0.41	0.97	0.331029	0.19	-0.04	0.72
833	1711663	P52655	TF2AA	Transcription initiation factor IIA subunit 1	376	41.5	4.55		1.053	0.993	0.93	0.859	1.507	0.858	0.919	0.82	0.96	1.129	1.014	0.987	1.106	0.963	0.934	0.925	0.937	0.916		0.992	1.075	0.9	1.043	1.001	0.926		1.07	0.403537	0.14	0.1	0.86	1.16	0.101267	0.53	0.21	0.28	0.97	0.0913041	0.56	-0.04	0.25
834	135629	Q00403	TF2B	Transcription initiation factor IIB	316	34.8	8.35		1.095	0.985	1.041	0.993	1.041	1.033	1.043	0.987	0.96	1.059	0.967	0.993	1.11	0.84	1.054	0.876	1.077	0.679		1.04	1.022	0.997	1.006	1.001	0.878		1.19	0.250672	0.24	0.25	0.61	1.16	0.218216	0.28	0.22	0.55	1.14	0.161672	0.37	0.18	0.43
835	3024708	Q16514	TAF12	Transcription initiation factor TFIID subunit 12	161	17.9	7.99		0.745	0.782	0.861	0.694	0.529	0.862	0.687	0.798	0.859	0.944	0.975	1.113	1.008	1.047	0.882	1.388	1.178	1.308		0.796	0.695	0.781	1.011	0.979	1.291		0.62	0.999978	0	-0.7	2.67	0.54	0.995757	0.01	-0.89	2.19	0.61	0.999837	0	-0.72	2.52
836	8928305	Q92804	RBP56	TATA-binding protein-associated factor 2N	592	61.8	8.02		0.885	1.006	0.887	1.055	0.686	1.061	0.919	0.973	0.938	1.074	1.186	1.095	1.022	0.79	1.128	1.113	1.095	0.567		0.926	0.934	0.944	1.118	0.98	0.925		1	0.0500032	1	0	0	1.01	0.0501819	0.97	0.01	0.01	1.02	0.0511905	0.92	0.03	0.03
837	46577572	Q9Y6J9	TAF6L	TAF6-like RNA polymerase II p300/CBP-associated factor-associated factor 65 kDa subunit 6L	622	67.8	8.97		1.057	0.955	1.099	0.907	0.821	0.848	1.08	1.052	1.047	0.813	0.967	0.995	0.983	0.885	1.01	0.963	1.015	0.902		1.037	0.859	1.06	0.925	0.959	0.96		1.08	0.272061	0.23	0.11	0.65	0.89	0.616639	0.07	-0.16	1.16	1.1	0.762143	0.04	0.14	1.37
838	74752778	Q9HBM6	TAF9B	Transcription initiation factor TFIID subunit 9B	251	27.6	9.55		0.882	0.873	0.95	1.021	0.451	1.049	0.908	0.913	0.917	0.919	0.783	0.81	0.845	1.04	0.88	0.974	0.912	1.227		0.902	0.84	0.913	0.837	0.922	1.038		0.87	0.253492	0.24	-0.2	0.61	0.81	0.140134	0.41	-0.3	0.38	0.88	0.233007	0.27	-0.18	0.58
839	116242812	P29083	T2EA	General transcription factor IIE subunit 1	439	49.4	4.82		0.918	0.994	0.941	0.925	1.155	0.928	0.893	1.081	0.914	0.991	1.052	1.031	1.05	0.941	0.983	1.028	1.018	0.993		0.951	1.003	0.963	1.025	0.991	1.013		0.94	0.636235	0.07	-0.09	1.17	0.99	0.0518036	0.9	-0.01	0.04	0.95	0.124337	0.45	-0.07	0.34
840	135232	P29084	T2EB	Transcription initiation factor IIE subunit beta	291	33	9.66		1.016	0.946	1.113	0.961	0.993	1.127	0.989	1.278	1.036	0.95	0.946	0.938	0.929	1.095	0.927	1.037	0.92	1.341		1.025	1.027	1.101	0.945	0.984	1.1		0.93	0.0834574	0.61	-0.1	0.22	0.93	0.0812632	0.62	-0.1	0.21	1	0.0500045	0.99	0	0
841	46397744	P35269	T2FA	General transcription factor IIF subunit 1	517	58.2	7.49		0.939	1	0.984	0.953	0.851	0.996	0.907	0.913	0.988	1.066	0.997	1.101	0.984	0.932	1.007	1.006	0.992	0.91		0.974	0.933	0.936	1.055	0.975	0.969		1.01	0.0521671	0.9	0.01	0.05	0.96	0.100979	0.53	-0.05	0.28	0.97	0.12494	0.45	-0.05	0.35
842	464519	P13984	T2FB	General transcription factor IIF subunit 2	249	28.4	9.23		0.938	0.958	0.965	1.049	0.68	0.985	0.989	1	0.988	1.034	0.999	1.054	1.063	1.053	0.99	1.02	1.043	0.957		0.954	0.905	0.992	1.029	1.035	1.007		0.95	0.450859	0.12	-0.08	0.91	0.9	0.132896	0.43	-0.15	0.36	0.99	0.0858488	0.62	-0.02	0.21
843	17865459	P78347	GTF2I	General transcription factor II-I	998	112.3	6.39		0.988	1.003	0.973	0.965	1.326	1.027	1.039	0.998	0.921	0.923	0.934	0.927	0.925	0.925	0.941	0.988	1.02	0.906		0.988	1.106	0.986	0.928	0.93	0.971		1.02	0.0752759	0.66	0.02	0.18	1.14	0.196259	0.31	0.19	0.51	1.01	0.0602396	0.78	0.02	0.11
844	3914807	O15160	RPAC1	DNA-directed RNA polymerases I and III subunit RPAC1	346	39.2	5.5		1.083	1.02	0.963	0.922	1.272	0.944	1.013	0.918	0.938	0.955	1	0.978	1.027	0.914	1.009	0.925	0.983	0.821		1.022	1.046	0.956	0.978	0.983	0.91		1.12	0.430047	0.13	0.17	0.89	1.15	0.183802	0.33	0.2	0.48	1.05	0.124432	0.45	0.07	0.35
845	11387119	Q9Y2S0	RPAC2	DNA-directed RNA polymerases I and III subunit RPAC2	133	15.2	5.8		1.033	1.064	0.983	0.992	1.043	1.046	0.958	0.99	1.005	0.735	0.979	0.724	1.085	0.748	1.284	0.675	0.93	0.709		1.027	1.027	0.985	0.813	1.039	0.771		1.33	0.800136	0.04	0.41	1.43	1.33	0.813441	0.04	0.41	1.45	1.28	0.680052	0.06	0.35	1.23
846	62901107	Q9GZS1	RPA49	DNA-directed RNA polymerase I subunit RPA49	481	53.9	8.56		1.232	1.109	1.102	1.01	1.063	0.949	1.021	1.03	1.041	1.114	1.044	1.006	0.964	0.893	0.992	0.956	1.019	0.957		1.148	1.007	1.031	1.055	0.95	0.977		1.17	0.906224	0.02	0.23	1.65	1.03	0.114136	0.49	0.04	0.31	1.05	0.635111	0.07	0.08	1.15
847	281185484	P24928	RPB1	DNA-directed RNA polymerase II subunit RPB1	1970	217	7.37		0.96	0.986	1.027	1.024	0.904	0.98	0.991	0.963	0.944	0.995	1.043	0.965	0.992	0.943	1.001	0.981	0.999	0.944		0.991	0.969	0.966	1.001	0.978	0.974		1.02	0.0985528	0.55	0.02	0.26	0.99	0.0517879	0.9	-0.01	0.05	0.99	0.0652782	0.71	-0.01	0.15
848	401012	P30876	RPB2	DNA-directed RNA polymerase II subunit RPB2	1174	133.8	6.87		1.027	1.036	1.026	1.039	1.156	1.027	1.021	0.966	0.966	0.996	0.998	0.97	1.006	0.997	0.998	1.011	1.009	0.954		1.029	1.074	0.984	0.988	1.001	0.991		1.04	0.464722	0.11	0.05	0.94	1.08	0.405252	0.14	0.12	0.85	0.99	0.0576413	0.8	-0.01	0.1
849	3915850	P19387	RPB3	DNA-directed RNA polymerase II subunit RPB3	275	31.4	4.92		1.13	1	1	1.022	1.359	0.956	1.031	0.894	0.898	0.947	0.964	0.965	1.017	0.934	0.976	0.98	0.978	0.839		1.043	1.113	0.941	0.959	0.975	0.933		1.12	0.367532	0.16	0.16	0.8	1.19	0.248339	0.25	0.25	0.61	1.01	0.0516226	0.9	0.01	0.04
850	3024558	O15514	RPB4	DNA-directed RNA polymerase II subunit RPB4	142	16.3	4.79		1.061	1.034	1.109	1.127	1.117	1.005	1.061	1.152	1.013	0.537	1.01	1.053	0.892	0.57	0.772	0.897	1.069	0.496		1.068	1.083	1.075	0.867	0.745	0.821		1.3	0.275629	0.22	0.38	0.65	1.32	0.294443	0.21	0.4	0.68	1.31	0.279249	0.22	0.39	0.66
851	116242767	P19388	RPAB1	DNA-directed RNA polymerases I, II, and III subunit RPABC1	210	24.5	5.95		0.977	0.994	0.995	1.141	0.78	1.031	1.11	1.04	1.124	1.034	1.094	1.086	1.076	0.994	1.07	1.098	1.099	0.971		0.989	0.984	1.091	1.071	1.046	1.056		0.94	0.312768	0.19	-0.09	0.72	0.93	0.0922727	0.57	-0.1	0.25	1.03	0.103332	0.52	0.05	0.29
852	47117761	P61218	RPAB2	DNA-directed RNA polymerases I, II, and III subunit RPABC2	127	14.5	4.22		0.966	1.012	0.993	0.987	1.144	0.964	0.967	0.924	0.952	0.971	1.027	0.955	0.839	0.857	0.982	0.766	1.077	0.59		0.99	1.031	0.948	0.984	0.893	0.811		1.22	0.220584	0.28	0.29	0.56	1.27	0.273517	0.22	0.35	0.65	1.17	0.149882	0.39	0.22	0.4
853	20178325	P52434	RPAB3	DNA-directed RNA polymerases I, II, and III subunit RPABC3	150	17.1	4.68		0.996	1.057	1.035	1.045	0.788	1.026	1.044	0.986	1.038	0.973	0.954	0.983	0.917	1.033	0.99	0.965	1.054	1.119		1.029	0.953	1.023	0.97	0.98	1.046		0.98	0.0633832	0.74	-0.02	0.13	0.91	0.15656	0.38	-0.13	0.42	0.98	0.074352	0.66	-0.03	0.18
854	548702	P36954	RPB9	DNA-directed RNA polymerase II subunit RPB9	125	14.5	5.14		1.158	1.201	1.007	0.981	1.158	1.124	0.998	0.919	1.098	0.891	0.947	1.083	1.04	0.925	0.999	0.986	1.017	0.922		1.122	1.088	1.005	0.974	0.988	0.975		1.15	0.553342	0.09	0.2	1.06	1.12	0.410508	0.14	0.16	0.86	1.03	0.0779054	0.64	0.04	0.19
855	1710664	P53803	RPAB4	DNA-directed RNA polymerases I, II, and III subunit RPABC4	58	7	9.06		0.961	1.02	0.992	1.02	1.203	0.917	0.931	0.928	0.874	0.959	0.958	1.094	0.965	0.863	0.996	0.948	0.956	0.943		0.991	1.047	0.911	1.004	0.942	0.949		1.04	0.60473	0.08	0.06	1.12	1.1	0.199262	0.31	0.14	0.51	0.96	0.466267	0.12	-0.06	0.94
856	51338657	P62875	RPAB5	DNA-directed RNA polymerases I, II, and III subunit RPABC5	67	7.6	7.77		0.997	0.962	0.909	0.837	1.359	0.988	0.953	0.943	0.822	1.045	0.893	0.858	0.892	1.122	1.078	1.066	0.885	1.281		0.956	1.061	0.906	0.932	1.031	1.078		0.89	0.167788	0.36	-0.17	0.45	0.98	0.050829	0.94	-0.02	0.03	0.84	0.265791	0.23	-0.25	0.63
857	206729892	O14802	RPC1	DNA-directed RNA polymerase III subunit RPC1	1390	155.5	8.48		1.065	0.997	0.979	1.008	1.08	1.064	1.123	0.979	1.049	1.166	1.099	1.151	1.065	1.105	1.125	1.083	1.005	0.954		1.014	1.05	1.05	1.138	1.098	1.014		1	0.05	1	0	0	1.04	0.124597	0.45	0.05	0.35	1.04	0.0945761	0.55	0.05	0.26
858	29428029	Q9NW08	RPC2	DNA-directed RNA polymerase III subunit RPC2	1133	127.7	8.5		0.969	0.977	1.035	1.007	0.869	1.033	0.932	1.015	0.986	0.881	0.955	1.025	0.967	1.172	0.935	0.99	0.98	0.989		0.994	0.97	0.977	0.953	1.025	0.986		1.01	0.0654824	0.74	0.01	0.13	0.98	0.0605261	0.76	-0.02	0.12	0.99	0.0644112	0.74	-0.01	0.13
859	60393871	Q9BUI4	RPC3	DNA-directed RNA polymerase III subunit RPC3	534	60.6	7.31		1.044	0.952	1.023	1.003	1.061	0.905	0.981	0.995	0.864	1.092	1.065	1.089	1.015	1.012	1.006	1.001	1.092	0.868		1.006	0.989	0.946	1.082	1.011	0.987		1.02	0.0577036	0.8	0.03	0.1	1	0.0500676	0.97	0	0.01	0.96	0.0803426	0.63	-0.06	0.2
860	20139728	Q9H1D9	RPC6	DNA-directed RNA polymerase III subunit RPC6	316	35.7	6.11		0.568	0.671	0.873	0.768	0.4	0.945	0.767	1.002	0.751	0.787	0.722	0.676	0.679	0.637	0.761	0.616	0.786	0.502		0.704	0.704	0.84	0.728	0.692	0.635		1.11	0.0845378	0.6	0.15	0.22	1.11	0.0656487	0.72	0.15	0.14	1.32	0.382667	0.15	0.4	0.82
861	218511818	O15318	RPC7	DNA-directed RNA polymerase III subunit RPC7	223	25.9	4.63		0.953	0.989	1.015	1.02	0.82	1.075	0.988	1.095	1.012	1.056	1.094	0.941	1.084	1.052	1.066	1.032	1.03	1.069		0.986	0.972	1.032	1.031	1.067	1.044		0.94	0.679727	0.06	-0.08	1.25	0.93	0.141365	0.41	-0.1	0.39	0.99	0.0627142	0.75	-0.02	0.13
862	34222504	O75400	PR40A	Pre-mRNA-processing factor 40 homolog A	957	108.7	7.56		0.988	1.062	1.076	1.043	1.257	1.034	1.065	0.979	1.06	1.014	1	0.995	0.957	0.952	1.007	1.04	1.011	1.061		1.042	1.111	1.035	1.003	0.972	1.037		1	0.0527902	0.89	0.01	0.05	1.07	0.157887	0.38	0.1	0.42	1	0.0504319	0.93	0	0.03
863	226693631	P49756	RBM25	RNA-binding protein 25	843	100.1	6.32		1.005	1.058	1.063	1.032	0.885	0.988	1.096	1.016	1.1	1.024	0.978	0.962	0.995	0.953	0.978	1.026	1.044	0.985		1.042	0.968	1.071	0.988	0.975	1.018		1.02	0.146442	0.4	0.03	0.4	0.95	0.173599	0.34	-0.07	0.46	1.05	0.336004	0.18	0.07	0.74
864	129383	P17844	DDX5	Probable ATP-dependent RNA helicase DDX5	614	69.1	8.92		1.023	1.052	1.016	1.031	0.945	1.046	0.969	0.974	0.946	1.008	1.023	1.011	1.035	1.005	1.02	1.045	1.04	0.964		1.03	1.007	0.963	1.014	1.02	1.017		1.01	0.0724303	0.65	0.02	0.19	0.99	0.0563666	0.83	-0.01	0.08	0.95	0.447551	0.12	-0.08	0.9
865	158514955	O14776	TCRG1	Transcription elongation regulator 1	1098	123.8	8.65		0.961	1.008	0.958	1.024	0.818	0.995	0.954	1.029	0.975	1.029	1.045	0.991	0.984	0.998	1.009	1.027	1.067	1.009		0.976	0.946	0.986	1.022	0.997	1.034		0.94	0.622762	0.07	-0.08	1.16	0.91	0.23973	0.26	-0.13	0.59	0.95	0.359927	0.17	-0.07	0.78
866	134037	P14678	RSMB	Small nuclear ribonucleoprotein-associated proteins B and B'	240	24.6	11.19		0.894	0.983	0.969	0.997	0.762	1.041	1.006	1.034	0.99	0.936	0.894	0.943	0.926	1.069	1.005	1.109	0.896	1.222		0.949	0.933	1.01	0.924	1	1.076		0.88	0.22735	0.27	-0.18	0.57	0.87	0.183888	0.33	-0.21	0.48	0.94	0.100578	0.53	-0.09	0.27
867	51338665	P62314	SMD1	Small nuclear ribonucleoprotein Sm D1	119	13.3	11.56		0.879	0.988	0.988	1.025	0.758	1.027	0.994	0.994	1	1.074	0.999	0.975	0.964	0.954	1.027	1.08	1.032	0.945		0.952	0.937	0.996	1.016	0.982	1.019		0.93	0.219629	0.28	-0.1	0.56	0.92	0.126414	0.45	-0.12	0.35	0.98	0.0863872	0.59	-0.03	0.23
868	51338666	P62316	SMD2	Small nuclear ribonucleoprotein Sm D2	118	13.5	9.91		0.95	1.03	0.989	1.025	0.74	0.993	1.006	1.066	1.02	0.928	0.963	0.907	0.875	1.092	0.93	1.079	0.906	1.288		0.99	0.919	1.031	0.933	0.966	1.091		0.91	0.13701	0.42	-0.14	0.38	0.84	0.208546	0.3	-0.25	0.53	0.94	0.0809006	0.62	-0.08	0.21
869	51338667	P62318	SMD3	Small nuclear ribonucleoprotein Sm D3	126	13.9	10.32		0.962	1.06	1.037	1.063	0.864	0.985	1.078	1.011	1.045	0.974	0.977	0.986	0.989	1.008	1.007	1.076	1.003	1.065		1.02	0.971	1.045	0.979	1.001	1.048		0.97	0.110939	0.49	-0.04	0.31	0.93	0.216907	0.28	-0.11	0.55	1	0.0510772	0.92	0	0.04
870	61237380	P62304	RUXE	Small nuclear ribonucleoprotein E	92	10.8	9.44		1.01	1.031	1.037	1.103	0.862	1.073	1.013	0.991	1.081	1.034	1.004	1.037	1.081	0.941	0.99	1.03	1.053	0.829		1.026	1.013	1.028	1.025	1.004	0.971		1.06	0.113841	0.48	0.08	0.32	1.04	0.0674779	0.71	0.06	0.15	1.06	0.110647	0.49	0.08	0.31
871	61237391	P62306	RUXF	Small nuclear ribonucleoprotein F	86	9.7	4.67		1.042	1.071	1.008	1.016	1.234	1.023	0.956	1.027	1.01	0.956	0.956	0.953	0.949	0.908	0.941	1.012	1.053	0.908		1.04	1.091	0.998	0.955	0.932	0.991		1.05	0.169138	0.35	0.07	0.45	1.1	0.206067	0.3	0.14	0.52	1.01	0.0522514	0.9	0.01	0.05
872	13635663	P08621	RU17	U1 small nuclear ribonucleoprotein 70 kDa	437	51.5	9.94		1.07	1.052	1.028	1.029	1.012	1.004	1.051	1.073	1.031	1.048	1.026	0.995	1.032	0.981	1.019	1.028	1.072	1.02		1.05	1.015	1.051	1.023	1.01	1.04		1.01	0.0762327	0.65	0.01	0.19	0.98	0.264812	0.24	-0.04	0.63	1.01	0.0818559	0.6	0.02	0.22
873	134092	P09012	SNRPA	U1 small nuclear ribonucleoprotein A	282	31.3	9.83		1.058	1.04	1.007	1.021	0.805	1.009	1.014	1.001	0.972	1.022	1.023	1.001	0.971	0.952	0.984	1.009	1.007	0.899		1.035	0.945	0.996	1.015	0.969	0.972		1.07	0.326317	0.18	0.09	0.74	0.97	0.0625116	0.75	-0.04	0.12	1.02	0.0921044	0.57	0.04	0.25
874	31077165	P09661	RU2A	U2 small nuclear ribonucleoprotein A'	255	28.4	8.62		0.959	0.994	1	1.033	0.933	1.035	0.977	0.984	1.006	1.089	1.04	1.058	1.044	1.003	0.931	1.004	1.081	0.907		0.984	1	0.989	1.062	0.993	0.997		0.99	0.0566892	0.82	-0.02	0.09	1	0.0502614	0.96	0	0.02	0.99	0.0526142	0.88	-0.01	0.05
875	134095	P08579	RU2B	U2 small nuclear ribonucleoprotein B''	225	25.5	9.72		1.089	1.015	1.015	0.99	1.06	0.997	1.101	0.984	1.03	1.041	1.056	0.996	1.047	0.976	1.039	1.081	1.079	1.005		1.039	1.016	1.038	1.031	1.021	1.055		0.99	0.0722568	0.68	-0.02	0.17	0.96	0.197819	0.3	-0.06	0.52	0.98	0.0673581	0.71	-0.02	0.15
876	2498882	Q15459	SF3A1	Splicing factor 3A subunit 1	793	88.8	5.22		1.006	1.034	0.988	1.007	1.065	1.006	1.025	0.988	1.003	0.982	1.014	0.989	0.951	0.956	0.98	1.028	1.013	0.954		1.009	1.026	1.005	0.995	0.962	0.998		1.01	0.0688135	0.7	0.02	0.16	1.03	0.145685	0.4	0.04	0.39	1.01	0.0583679	0.79	0.01	0.1
877	20141793	Q15428	SF3A2	Splicing factor 3A subunit 2	464	49.2	9.64		0.993	1.034	1.005	1.004	0.963	0.967	1.058	0.977	0.976	1.025	0.945	0.912	0.965	0.911	0.934	0.984	0.997	0.976		1.011	0.978	1.003	0.961	0.937	0.986		1.03	0.404706	0.14	0.04	0.86	0.99	0.0831324	0.63	-0.01	0.2	1.02	0.090148	0.56	0.03	0.25
878	17380310	Q12874	SF3A3	Splicing factor 3A subunit 3	501	58.8	5.38		1.087	1.067	1.009	1.014	1.229	0.975	0.978	1.026	1.051	1.081	0.992	0.998	0.991	0.938	1.006	0.957	0.995	0.989		1.054	1.073	1.018	1.024	0.978	0.98		1.08	0.735674	0.05	0.1	1.32	1.09	0.197757	0.31	0.13	0.51	1.04	0.310306	0.2	0.05	0.7
879	74750541	Q86XP3	DDX42	ATP-dependent RNA helicase DDX42	938	102.9	7.02		1.071	1.048	1.021	1.002	1.104	0.989	0.99	0.997	1.02	1.005	1.036	1.003	1.006	0.926	1.027	1.019	1.028	0.93		1.047	1.032	1.002	1.014	0.987	0.992		1.06	0.32399	0.19	0.08	0.73	1.04	0.125417	0.45	0.06	0.34	1.01	0.0600815	0.76	0.02	0.12
880	46577625	Q7RTV0	PHF5A	PHD finger-like domain-containing protein 5A	110	12.4	8.41		0.966	0.984	0.974	0.975	0.834	0.98	0.973	1	0.983	1.072	1.038	0.977	1.011	0.989	0.981	1.011	1.009	0.975		0.975	0.93	0.985	1.029	0.994	0.998		0.98	0.391932	0.14	-0.03	0.86	0.93	0.256917	0.24	-0.1	0.62	0.99	0.14247	0.41	-0.02	0.38
881	269849656	O75533	SF3B1	Splicing factor 3B subunit 1	1304	145.7	7.09		1.004	1.05	1.012	1.03	0.864	0.998	1.073	1.024	1.028	0.973	0.987	0.956	0.976	0.987	0.942	1.02	1.012	1.002		1.022	0.964	1.041	0.972	0.968	1.011		1.01	0.107263	0.51	0.02	0.3	0.95	0.141858	0.41	-0.07	0.39	1.03	0.396878	0.14	0.04	0.85
882	296452908	Q13435	SF3B2	Splicing factor 3B subunit 2	895	100.2	5.67		1.004	0.988	0.997	0.998	0.827	1.017	1.016	1.028	1.016	0.98	0.933	0.968	0.976	0.96	0.969	1.026	0.975	0.976		0.996	0.947	1.02	0.96	0.968	0.993		1	0.0531482	0.84	0.01	0.08	0.95	0.108166	0.51	-0.07	0.29	1.03	0.312297	0.19	0.04	0.72
883	116242787	Q15393	SF3B3	Splicing factor 3B subunit 3	1217	135.5	5.26		0.953	0.984	0.982	0.997	0.933	1	1.02	1.003	0.986	1.022	0.994	0.968	0.994	1.007	0.996	1.042	1.012	1.047		0.973	0.977	1.003	0.995	0.999	1.034		0.94	0.95732	0.01	-0.09	1.84	0.94	0.579774	0.08	-0.08	1.1	0.97	0.501771	0.1	-0.04	0.98
884	2500587	Q15427	SF3B4	Splicing factor 3B subunit 4	424	44.4	8.56		0.86	0.956	0.942	0.979	0.592	1.003	1.009	1.01	0.919	1.091	1.022	0.972	1.001	1.135	0.936	1.044	1.031	1.178		0.92	0.858	0.979	1.028	1.024	1.084		0.85	0.768057	0.04	-0.24	1.38	0.79	0.325236	0.18	-0.34	0.74	0.9	0.42051	0.13	-0.15	0.88
885	20140757	Q9BWJ5	SF3B5	Splicing factor 3B subunit 5	86	10.1	6.35		1.126	1.052	0.946	0.967	1.478	0.896	1.022	1.001	1.21	1.05	0.903	0.922	0.962	1.028	1.006	1.22	0.952	1.407		1.041	1.114	1.078	0.958	0.999	1.193		0.87	0.174765	0.35	-0.2	0.46	0.93	0.0630819	0.74	-0.1	0.13	0.9	0.11553	0.48	-0.15	0.32
886	12585536	Q9Y3B4	SF3B6	Splicing factor 3B subunit 6	125	14.6	9.38		0.964	1.065	1.014	1.005	1.036	0.983	0.946	1.022	1.064	0.949	0.974	0.961	1	1.143	0.951	1.113	0.956	1.291		1.014	1.008	1.011	0.961	1.031	1.12		0.91	0.169746	0.36	-0.14	0.45	0.9	0.192316	0.32	-0.15	0.5	0.9	0.172529	0.35	-0.15	0.46
887	267187	Q01081	U2AF1	Splicing factor U2AF 35 kDa subunit	240	27.9	8.81		1.025	1.037	0.958	1.057	0.685	1.052	1.044	1.105	1.049	1.106	1.1	0.994	1.013	1.01	1.025	1.097	1.115	1.049		1.007	0.931	1.066	1.067	1.016	1.087		0.93	0.648983	0.06	-0.11	1.19	0.86	0.220269	0.28	-0.22	0.55	0.98	0.111942	0.49	-0.03	0.31
888	267188	P26368	U2AF2	Splicing factor U2AF 65 kDa subunit	475	53.5	9.09		1.069	1.005	1.044	1.05	0.904	1.033	1.047	0.977	1.087	1.068	1.024	0.963	1.009	0.972	1.027	1.038	1.032	0.958		1.039	0.996	1.037	1.018	1.003	1.01		1.03	0.140575	0.4	0.04	0.4	0.99	0.0575121	0.81	-0.02	0.09	1.03	0.0963971	0.54	0.04	0.27
889	74761960	Q9UHX1	PUF60	Poly(U)-binding-splicing factor PUF60	559	59.8	5.29		0.958	1.004	0.972	1.025	0.891	1.027	1.017	1.01	1.044	0.99	0.971	0.973	0.999	1.042	0.993	1.054	0.985	1.123		0.978	0.981	1.024	0.978	1.011	1.054		0.93	0.394292	0.15	-0.11	0.84	0.93	0.210656	0.29	-0.1	0.53	0.97	0.107425	0.51	-0.04	0.29
890	37087924	O75940	SPF30	Survival of motor neuron-related-splicing factor 30	238	26.7	7.24		1.08	1.073	1.057	1.042	1.104	1.022	1.087	1	1.192	1.09	1.02	0.905	1.038	1.002	1.008	0.981	0.938	0.982		1.07	1.056	1.093	1.005	1.016	0.967		1.11	0.999834	0	0.15	2.52	1.09	0.80892	0.04	0.13	1.44	1.13	0.532113	0.09	0.18	1.03
891	34925383	Q96I25	SPF45	Splicing factor 45	401	44.9	5.97		0.881	1.032	0.957	1.077	0.818	1.084	1.091	1.102	0.983	0.977	0.961	0.983	0.976	1.014	0.949	1.065	0.984	1.155		0.957	0.993	1.059	0.974	0.98	1.068		0.9	0.353303	0.17	-0.16	0.78	0.93	0.110246	0.5	-0.1	0.3	0.99	0.0522255	0.89	-0.01	0.05
892	296439404	Q8IWX8	CHERP	Calcium homeostasis endoplasmic reticulum protein	916	103.6	9.04		1.063	1.049	1.053	1.012	0.654	1.013	1.087	1.077	1.082	1.007	1.049	0.972	0.991	1.004	0.962	1.039	0.992	0.98		1.055	0.893	1.082	1.009	0.985	1.004		1.05	0.717006	0.05	0.07	1.3	0.89	0.141648	0.41	-0.17	0.39	1.08	0.968231	0.01	0.11	1.89
893	147668553	O15042	SR140	U2 snRNP-associated SURP motif-containing protein	1029	118.2	8.47		0.911	1.02	1.005	1.029	1.001	1.06	1.036	1.048	1.023	0.95	0.839	0.897	0.842	1.135	0.943	1.219	0.859	1.289		0.979	1.03	1.036	0.895	0.973	1.122		0.87	0.16772	0.36	-0.2	0.45	0.92	0.100676	0.53	-0.12	0.28	0.92	0.0948208	0.55	-0.12	0.26
894	13124667	O43143	DHX15	Putative pre-mRNA-splicing factor ATP-dependent RNA helicase DHX15	795	90.9	7.46		0.983	1.015	0.998	1.016	0.901	1.009	1.006	1.022	1.04	1.015	0.996	0.952	0.991	0.986	0.987	1.015	1.02	1.008		0.998	0.975	1.023	0.988	0.988	1.014		0.98	0.331662	0.18	-0.02	0.74	0.96	0.168467	0.36	-0.06	0.45	1.01	0.130959	0.45	0.01	0.34
895	10720079	Q9Y333	LSM2	U6 snRNA-associated Sm-like protein LSm2	95	10.8	6.52		1.134	1.035	1.036	0.986	1.384	0.947	1.054	0.956	0.988	1.067	1.088	1.027	1.026	0.849	0.994	0.85	1.031	0.746		1.068	1.106	1	1.06	0.956	0.875		1.22	0.518003	0.1	0.29	1.01	1.26	0.268961	0.23	0.34	0.64	1.14	0.268207	0.23	0.19	0.64
896	61227725	P62310	LSM3	U6 snRNA-associated Sm-like protein LSm3	102	11.8	4.7		0.95	1.003	1.018	1.004	0.83	0.994	0.974	1.021	0.982	1.044	1.042	1.062	1.075	1.012	1.093	1.059	1.026	0.94		0.99	0.942	0.992	1.049	1.06	1.008		0.98	0.070634	0.69	-0.03	0.16	0.93	0.15672	0.38	-0.1	0.42	0.98	0.0686757	0.69	-0.02	0.16
897	10720082	Q9Y4Z0	LSM4	U6 snRNA-associated Sm-like protein LSm4	139	15.3	9.99		0.822	0.997	0.929	1.044	0.633	1	0.894	1.149	0.94	0.905	0.829	0.869	0.942	1.039	0.896	1.021	0.95	1.41		0.916	0.892	0.994	0.868	0.959	1.127		0.81	0.259791	0.24	-0.3	0.63	0.79	0.210732	0.29	-0.34	0.54	0.88	0.122069	0.46	-0.18	0.34
898	61227727	P62312	LSM6	U6 snRNA-associated Sm-like protein LSm6	80	9.1	9.58		0.666	0.832	0.921	1.059	0.583	1.038	0.879	0.919	0.986	0.915	0.852	0.86	0.912	1.093	0.989	1.098	0.859	1.414		0.806	0.893	0.928	0.875	0.998	1.124		0.72	0.390433	0.15	-0.48	0.83	0.79	0.16628	0.36	-0.33	0.44	0.83	0.206075	0.3	-0.28	0.52
899	10720075	Q9UK45	LSM7	U6 snRNA-associated Sm-like protein LSm7	103	11.6	5.27		0.948	0.99	0.956	1.053	0.731	1.023	0.946	1.009	1.048	1.033	0.935	1.042	0.942	1.072	1.017	0.987	1.018	1.025		0.965	0.936	1.001	1.003	1.01	1.01		0.96	0.664735	0.06	-0.07	1.2	0.93	0.105396	0.51	-0.11	0.29	0.99	0.0584893	0.8	-0.01	0.1
900	10720071	O95777	LSM8	U6 snRNA-associated Sm-like protein LSm8	96	10.4	4.48		1.01	0.968	1.035	0.968	1.111	0.957	1.049	1.068	0.903	0.992	0.92	1.063	0.991	1.03	1.012	1.127	0.991	0.933		1.004	1.012	1.007	0.992	1.011	1.017		0.99	0.0548906	0.84	-0.02	0.07	1	0.050462	0.95	-0.01	0.02	0.99	0.0517701	0.9	-0.01	0.05
901	37082334	O43395	PRPF3	U4/U6 small nuclear ribonucleoprotein Prp3	683	77.5	9.5		1.038	1.03	1.032	0.995	1.055	1.078	1.077	1.022	1.025	1.02	1.005	0.977	0.965	0.978	0.99	1.03	1.034	0.914		1.033	1.043	1.041	1.001	0.978	0.993		1.04	0.162019	0.36	0.06	0.44	1.05	0.175994	0.34	0.07	0.46	1.05	0.184388	0.32	0.07	0.49
902	20514971	O43172	PRP4	U4/U6 small nuclear ribonucleoprotein Prp4	522	58.4	7.42		1.049	0.97	0.998	0.956	1.089	0.953	0.998	1.046	0.998	1.073	0.979	0.965	0.997	1.022	1.007	0.999	1.008	0.948		1.005	1	1.014	1.006	1.009	0.985		1.02	0.0988535	0.54	0.03	0.27	1.01	0.0601917	0.78	0.02	0.11	1.03	0.201409	0.31	0.04	0.51
903	37082225	O43447	PPIH	Peptidyl-prolyl cis-trans isomerase H	177	19.2	8.07		0.71	0.985	0.932	0.998	0.758	0.98	0.899	0.939	0.996	0.956	0.919	0.929	0.988	1.054	0.987	1.077	0.952	1.4		0.876	0.912	0.945	0.935	1.009	1.143		0.77	0.355528	0.17	-0.38	0.78	0.8	0.292659	0.21	-0.33	0.68	0.83	0.278226	0.22	-0.27	0.66
904	90101442	Q8WWY3	PRP31	U4/U6 small nuclear ribonucleoprotein Prp31	499	55.4	5.78		1.055	1.051	1.023	1.001	0.925	1.037	0.999	1.049	1.014	1.018	1.014	0.971	1.006	0.91	1.008	0.953	1.008	0.965		1.043	0.987	1.021	1.001	0.975	0.975		1.07	0.884167	0.03	0.1	1.59	1.01	0.0612506	0.76	0.02	0.12	1.05	0.484216	0.11	0.07	0.96
905	2500345	P55769	NH2L1	NHP2-like protein 1	128	14.2	8.46		0.929	0.975	0.976	0.961	1.185	0.993	0.97	1.01	0.915	1.011	0.963	0.91	0.994	1.096	1.038	1.07	1.006	1.544		0.96	1.046	0.965	0.961	1.043	1.207		0.8	0.277655	0.22	-0.33	0.66	0.87	0.133526	0.43	-0.21	0.37	0.8	0.265029	0.23	-0.32	0.64
906	74735389	O43290	SNUT1	U4/U6.U5 tri-snRNP-associated protein 1	800	90.2	6.13		0.999	1.03	1.013	0.971	1.144	0.981	1.059	1.005	0.979	1.06	1.002	0.978	0.975	0.921	0.986	0.972	1.042	0.883		1.014	1.032	1.014	1.013	0.961	0.966		1.05	0.164122	0.36	0.07	0.45	1.07	0.139928	0.41	0.1	0.39	1.05	0.143694	0.4	0.07	0.4
907	88909655	Q53GS9	SNUT2	U4/U6.U5 tri-snRNP-associated protein 2	565	65.3	8.91		0.918	0.971	0.916	0.945	1.277	0.996	0.923	0.955	0.94	1.071	1.057	1.027	1.042	0.974	1.023	1.034	0.985	0.953		0.935	1.073	0.939	1.052	1.013	0.991		0.94	0.423376	0.13	-0.08	0.88	1.08	0.114935	0.48	0.11	0.32	0.95	0.482185	0.11	-0.08	0.96
908	52783532	Q96NC0	ZMAT2	Zinc finger matrin-type protein 2	199	23.6	9.01		1.006	0.995	0.995	1.06	0.935	0.99	0.937	0.991	1.019	1.03	1.036	1.097	1.003	0.955	1.02	0.991	1.046	1.029		0.998	0.995	0.982	1.054	0.993	1.022		0.98	0.274709	0.23	-0.03	0.64	0.97	0.100046	0.53	-0.04	0.27	0.96	0.256002	0.24	-0.06	0.62
909	74760086	Q8NAV1	PR38A	Pre-mRNA-splicing factor 38A	312	37.5	9.96		1.049	1.003	0.946	0.923	1.172	0.938	0.96	0.964	0.998	0.964	1.066	1.051	0.998	0.953	0.989	1.02	1.06	0.955		0.999	1.011	0.974	1.027	0.98	1.012		0.99	0.0599052	0.79	-0.02	0.1	1	0.0500143	1	0	0	0.96	0.195441	0.32	-0.05	0.5
910	74746965	Q5VTL8	PR38B	Pre-mRNA-splicing factor 38B	546	64.4	10.54		1.119	1.023	0.996	1.037	0.909	0.945	1.017	0.936	0.985	0.966	1.012	1.064	1.048	1.063	1.081	1.018	1.021	0.995		1.046	0.964	0.979	1.014	1.064	1.011		1.03	0.141115	0.42	0.05	0.38	0.95	0.208288	0.29	-0.07	0.53	0.97	0.229088	0.27	-0.05	0.56
911	18202501	Q15029	U5S1	116 kDa U5 small nuclear ribonucleoprotein component	972	109.4	5		0.977	1.025	1.011	1.011	1.008	0.997	1.01	0.996	0.969	0.999	0.972	0.946	0.973	0.943	0.996	0.997	1.009	0.976		1.004	1.005	0.992	0.972	0.971	0.994		1.01	0.0863538	0.58	0.01	0.24	1.01	0.168541	0.34	0.02	0.47	1	0.0517933	0.89	0	0.05
912	56405304	O75643	U520	U5 small nuclear ribonucleoprotein 200 kDa helicase	2136	244.4	6.06		1.033	1.039	1.015	1.018	0.959	1	1.044	1.011	1.023	1.028	1.005	0.982	0.99	0.978	0.974	1.017	1.031	0.976		1.029	0.992	1.026	1.005	0.981	1.008		1.02	0.198104	0.31	0.03	0.51	0.98	0.0978711	0.55	-0.02	0.26	1.02	0.146387	0.4	0.03	0.4
913	24212088	O94906	PRP6	Pre-mRNA-processing factor 6	941	106.9	8.25		0.957	1.027	0.975	1.025	0.865	1.02	1.014	1.043	1.011	1.078	1.01	1.045	1.003	0.979	0.988	1.071	1.075	0.962		0.987	0.97	1.023	1.044	0.99	1.036		0.95	0.194428	0.31	-0.07	0.51	0.94	0.164824	0.36	-0.09	0.44	0.99	0.0622594	0.74	-0.02	0.13
914	67460824	Q6P2Q9	PRP8	Pre-mRNA-processing-splicing factor 8	2335	273.4	8.84		0.979	0.991	0.985	1.011	0.861	1.022	1.001	1.009	0.997	0.961	0.944	0.951	0.938	0.952	0.955	0.989	0.956	0.966		0.985	0.965	1.002	0.952	0.948	0.971		1.01	0.24824	0.24	0.02	0.62	0.99	0.0513742	0.92	-0.01	0.04	1.03	0.778623	0.04	0.05	1.44
915	160385708	Q9BUQ8	DDX23	Probable ATP-dependent RNA helicase DDX23	820	95.5	9.55		0.951	1.02	0.944	0.999	0.955	0.973	1.057	0.98	0.993	0.996	0.971	0.984	0.985	0.988	0.995	0.99	0.984	1.005		0.972	0.976	1.01	0.984	0.989	0.993		0.98	0.126254	0.44	-0.03	0.36	0.98	0.205737	0.29	-0.03	0.53	1.02	0.10156	0.53	0.02	0.28
916	67462075	Q96DI7	SNR40	U5 small nuclear ribonucleoprotein 40 kDa protein	357	39.3	8.1		0.973	0.949	0.956	1.016	0.973	0.962	1.038	0.963	0.98	1.057	1.045	1.005	1.031	1.043	1.022	1.053	1.039	0.981		0.959	0.984	0.993	1.036	1.032	1.024		0.94	0.730346	0.05	-0.09	1.31	0.96	0.278855	0.22	-0.06	0.67	0.97	0.154387	0.39	-0.04	0.41
917	46577662	P83876	TXN4A	Thioredoxin-like protein 4A	142	16.8	5.85		1.004	1.017	1.001	0.969	1.073	0.923	0.967	1.016	0.941	1.052	1.018	1.046	0.99	0.917	0.996	0.898	1.001	0.884		1.007	0.988	0.975	1.038	0.968	0.928		1.09	0.506192	0.1	0.12	1	1.07	0.167701	0.35	0.09	0.45	1.05	0.180442	0.34	0.07	0.47
918	1705654	Q09161	NCBP1	Nuclear cap-binding protein subunit 1	790	91.8	6.43		0.952	1.009	0.982	1.034	0.909	1.022	0.991	0.942	0.99	0.977	0.976	1.005	0.978	0.998	0.992	0.97	1.013	1.016		0.981	0.989	0.975	0.986	0.989	1		0.98	0.129634	0.45	-0.03	0.35	0.99	0.0571538	0.81	-0.02	0.09	0.97	0.191172	0.31	-0.04	0.5
919	1705651	P52298	NCBP2	Nuclear cap-binding protein subunit 2	156	18	8.21		1.069	1.028	1.013	1.043	0.758	1.08	1.175	1.129	1.245	0.951	0.944	0.97	0.93	0.944	0.944	1.035	0.951	1.121		1.036	0.96	1.183	0.955	0.939	1.036		1	0.05	0.99	0	0	0.93	0.098871	0.54	-0.11	0.27	1.14	0.625642	0.07	0.19	1.17
920	288558857	P09651	ROA1	Heterogeneous nuclear ribonucleoprotein A1	372	38.7	9.13		1.016	1.012	0.976	1.044	1.036	1.032	1.044	0.985	0.968	1.002	0.971	0.944	1.011	0.984	1.025	1.104	1.026	1.038		1.002	1.037	0.999	0.972	1.007	1.056		0.95	0.452761	0.12	-0.08	0.94	0.98	0.115085	0.48	-0.03	0.32	0.95	0.359826	0.16	-0.08	0.79
921	51338779	P51991	ROA3	Heterogeneous nuclear ribonucleoprotein A3	378	39.6	9.01		0.973	1.024	0.94	1.039	0.79	1.055	1.059	1.074	1.062	1.014	0.946	0.89	0.968	1.068	1.004	1.151	1.012	1.277		0.979	0.962	1.065	0.95	1.014	1.147		0.85	0.49499	0.1	-0.23	0.98	0.84	0.328144	0.18	-0.25	0.74	0.93	0.174557	0.34	-0.11	0.46
922	108935845	P07910	HNRPC	Heterogeneous nuclear ribonucleoproteins C1/C2	306	33.6	5.08		1.082	1.071	1.012	0.986	1.342	0.976	1.088	1.049	1.036	1.005	0.995	0.958	0.957	0.954	0.964	1.004	1.006	0.954		1.055	1.102	1.058	0.986	0.959	0.988		1.07	0.61196	0.07	0.09	1.15	1.11	0.145572	0.4	0.16	0.4	1.07	0.790238	0.04	0.1	1.4
923	48429103	P61978	HNRPK	Heterogeneous nuclear ribonucleoprotein K	463	50.9	5.54		0.978	0.989	0.977	1.012	0.996	1	1.002	1.001	1.012	0.997	0.972	0.988	0.974	0.979	1.003	1.018	0.996	0.979		0.981	1.003	1.005	0.986	0.985	0.998		0.98	0.270323	0.24	-0.02	0.62	1.01	0.0677894	0.71	0.01	0.15	1.01	0.0877487	0.58	0.01	0.24
924	55977747	P52272	HNRPM	Heterogeneous nuclear ribonucleoprotein M	730	77.5	8.7		1.051	1.028	1.003	1.018	1.088	1.008	1.076	1.033	1.027	1.044	1.011	0.979	1.009	0.954	0.989	1.021	1.021	0.955		1.027	1.038	1.046	1.011	0.984	0.999		1.03	0.176263	0.34	0.04	0.47	1.04	0.198275	0.31	0.06	0.51	1.05	0.374956	0.16	0.07	0.8
925	254763463	Q00839	HNRPU	Heterogeneous nuclear ribonucleoprotein U	825	90.5	6		0.994	1.05	0.993	1.007	0.896	1.001	1.053	1.028	1.023	1.027	1.001	0.971	0.984	0.956	0.981	1.028	1.03	0.977		1.012	0.968	1.034	1	0.974	1.011		1	0.0501625	0.98	0	0.01	0.96	0.175849	0.34	-0.06	0.47	1.02	0.198932	0.31	0.03	0.51
926	42560548	Q15365	PCBP1	Poly(rC)-binding protein 1	356	37.5	7.09		0.941	0.96	0.979	0.988	0.915	1.006	0.957	0.945	1.029	0.927	0.984	0.956	1.007	1.097	1.056	1.045	0.964	1.145		0.96	0.97	0.977	0.956	1.053	1.051		0.91	0.358815	0.16	-0.13	0.79	0.92	0.252807	0.24	-0.12	0.62	0.93	0.223875	0.27	-0.11	0.57
927	23503093	P38159	RBMX	RNA-binding motif protein, X chromosome	391	42.3	10.05		1.105	1.094	1.022	1.005	1.136	1.01	1.027	1.006	0.957	1.049	1.019	0.974	0.979	0.909	0.994	0.999	1.003	0.952		1.073	1.051	0.997	1.014	0.961	0.985		1.09	0.745994	0.05	0.12	1.35	1.07	0.274274	0.23	0.09	0.64	1.01	0.0721213	0.68	0.02	0.17
928	74760797	Q96E39	RMXL1	RNA binding motif protein, X-linked-like-1	390	42.1	9.89		1.023	1.092	0.995	1.04	1.434	0.923	1.063	0.866	1.041	1.021	0.872	0.934	0.985	0.815	0.894	0.985	1.027	0.93		1.037	1.133	0.99	0.942	0.898	0.98		1.06	0.267583	0.23	0.08	0.63	1.16	0.153145	0.39	0.21	0.41	1.01	0.0522815	0.9	0.01	0.05
929	730773	Q07955	SRSF1	Serine/arginine-rich splicing factor 1	248	27.7	10.36		1.003	1.036	0.996	1.018	0.848	0.99	1.039	0.983	1.01	1.055	1.012	1.018	1.011	0.942	0.994	0.983	1.033	0.94		1.012	0.952	1.011	1.028	0.982	0.985		1.03	0.140577	0.42	0.04	0.38	0.97	0.0835536	0.61	-0.05	0.22	1.03	0.124509	0.46	0.04	0.34
930	47605579	O75494	SRS10	Serine/arginine-rich splicing factor 10	262	31.3	11.27		1.09	1.011	1.042	1.034	1.174	0.948	1.128	0.989	0.99	1.059	1.089	1.022	1.019	0.934	0.995	0.98	1.102	0.865		1.048	1.052	1.036	1.057	0.983	0.982		1.07	0.140814	0.42	0.09	0.38	1.07	0.108749	0.5	0.1	0.3	1.05	0.0961695	0.55	0.08	0.26
931	60416437	Q01130	SRSF2	Serine/arginine-rich splicing factor 2	221	25.5	11.85		0.933	0.948	0.972	0.988	0.813	1.071	0.938	1.01	0.965	1.024	0.994	1.046	1.036	1.016	0.988	0.998	1.038	0.908		0.951	0.957	0.971	1.021	1.013	0.981		0.97	0.110592	0.49	-0.05	0.31	0.98	0.0584761	0.79	-0.04	0.1	0.99	0.0555626	0.82	-0.02	0.09
932	51338672	P84103	SRSF3	Serine/arginine-rich splicing factor 3	164	19.3	11.65		1.006	1.013	0.989	1.01	1	0.978	0.999	0.981	0.976	1.024	1.001	0.992	1.011	0.956	1.02	1.008	1.027	0.928		1.003	0.996	0.986	1.005	0.996	0.988		1.02	0.0748758	0.65	0.02	0.19	1.01	0.0567696	0.81	0.01	0.09	1	0.0504399	0.95	0	0.02
933	20981726	Q08170	SRSF4	Serine/arginine-rich splicing factor 4	494	56.6	11.52		1.098	1.037	1.007	1.03	1.13	0.947	1.038	0.929	1.017	1.084	1.07	1.052	1.023	0.907	1.032	0.913	1.051	0.826		1.047	1.036	0.995	1.069	0.988	0.93		1.13	0.342703	0.17	0.17	0.76	1.11	0.222518	0.28	0.16	0.56	1.07	0.134841	0.43	0.1	0.37
934	3929378	Q13243	SRSF5	Serine/arginine-rich splicing factor 5	272	31.2	11.59		0.97	1.004	0.914	1.001	0.859	0.936	0.899	0.842	0.965	1.095	1.12	1.038	1.044	0.926	1.001	1.021	1.105	0.769		0.963	0.932	0.902	1.084	0.99	0.965		1	0.0500392	0.98	0	0.01	0.97	0.0598001	0.77	-0.05	0.11	0.93	0.0873066	0.59	-0.1	0.23
935	20981728	Q13247	SRSF6	Serine/arginine-rich splicing factor 6	344	39.6	11.43		1.051	1.047	1.018	1.027	1.281	0.999	1.029	1.022	1.027	1.026	0.958	0.954	0.972	0.957	0.989	0.982	1.005	0.923		1.039	1.102	1.026	0.979	0.973	0.97		1.07	0.668136	0.06	0.1	1.22	1.14	0.268648	0.23	0.18	0.64	1.06	0.563125	0.08	0.08	1.08
936	3929380	Q16629	SRSF7	Serine/arginine-rich splicing factor 7	238	27.4	11.82		1.013	0.995	0.998	0.991	0.93	1.044	1.046	1.032	1.058	0.972	0.935	0.919	0.951	0.961	0.979	0.986	0.92	1.002		1.002	0.988	1.046	0.942	0.964	0.969		1.03	0.22934	0.27	0.05	0.57	1.02	0.0725867	0.67	0.03	0.17	1.08	0.766931	0.04	0.11	1.37
937	3929377	Q13242	SRSF9	Serine/arginine-rich splicing factor 9	221	25.5	8.65		0.99	1.032	0.991	1.027	0.723	0.99	1.019	1.054	1.023	1.047	1.011	0.962	1.001	1.03	0.99	1.076	1.026	1.109		1.004	0.913	1.032	1.007	1.007	1.07		0.94	0.593451	0.08	-0.09	1.11	0.85	0.321813	0.19	-0.23	0.73	0.96	0.272204	0.23	-0.05	0.65
938	4033480	Q13595	TRA2A	Transformer-2 protein homolog alpha	282	32.7	11.27		0.983	0.941	0.909	0.929	1.086	0.949	0.992	0.962	0.929	1.007	0.985	0.988	0.965	0.905	0.956	1.064	0.974	0.963		0.945	0.988	0.961	0.993	0.942	1		0.94	0.271207	0.22	-0.08	0.65	0.99	0.0544433	0.84	-0.02	0.07	0.96	0.172259	0.35	-0.06	0.46
939	51703330	P62995	TRA2B	Transformer-2 protein homolog beta	288	33.6	11.25		0.996	0.991	0.996	0.995	0.878	0.986	1.02	1.023	0.99	1.033	0.964	0.974	0.965	1.056	1.007	1.129	1.069	1.155		0.994	0.953	1.011	0.991	1.009	1.118		0.89	0.990136	0.01	-0.17	2.06	0.85	0.906469	0.02	-0.23	1.65	0.9	0.936681	0.02	-0.14	1.74
940	26006959	O60231	DHX16	Putative pre-mRNA-splicing factor ATP-dependent RNA helicase DHX16	1041	119.2	6.8		1.056	1.003	1.018	1.01	1.081	1.022	0.984	0.973	1.027	1.03	1.035	1.007	0.97	0.98	0.998	0.987	0.99	0.908		1.026	1.038	0.995	1.024	0.983	0.962		1.07	0.482278	0.11	0.09	0.96	1.08	0.530578	0.09	0.11	1.03	1.03	0.169475	0.36	0.05	0.45
941	17380181	O60508	PRP17	Pre-mRNA-processing factor 17	579	65.5	7.06		1.036	0.941	0.934	0.976	1.251	0.936	1.033	0.94	0.94	0.952	0.93	0.973	0.975	1.052	0.979	0.974	1.016	1.001		0.97	1.054	0.971	0.951	1.002	0.997		0.97	0.113988	0.49	-0.04	0.31	1.06	0.085127	0.6	0.08	0.22	0.97	0.115818	0.48	-0.04	0.32
942	116241326	Q7L014	DDX46	Probable ATP-dependent RNA helicase DDX46	1031	117.3	9.29		0.973	0.996	0.996	0.973	0.878	1.019	1.005	0.995	0.99	1.021	1.034	1.007	1.007	1.006	1.003	1.028	1.026	0.983		0.988	0.957	0.996	1.021	1.005	1.012		0.98	0.27754	0.23	-0.03	0.65	0.95	0.219855	0.27	-0.08	0.56	0.98	0.168637	0.37	-0.02	0.44
943	85700389	Q92620	PRP16	Pre-mRNA-splicing factor ATP-dependent RNA helicase PRP16	1227	140.4	6.54		0.948	0.994	0.854	0.981	0.976	1.025	0.974	1.011	0.976	1.083	1.02	1.001	1.044	0.962	0.977	1	0.969	0.949		0.932	0.994	0.987	1.035	0.995	0.972		0.96	0.140638	0.41	-0.06	0.39	1.02	0.163898	0.37	0.03	0.43	1.02	0.116853	0.48	0.02	0.32
944	262527559	O95391	SLU7	Pre-mRNA-splicing factor SLU7	586	68.3	7.14		1.093	1.13	1.089	1.065	0.935	1.059	0.992	0.977	1.009	1.088	1.238	1.14	1.197	1.017	1.035	1.141	1.172	1.049		1.104	1.02	0.992	1.155	1.083	1.121		0.99	0.070191	0.69	-0.02	0.16	0.91	0.391412	0.15	-0.14	0.83	0.89	0.866899	0.03	-0.18	1.55
945	308153407	Q9UKV3	ACINU	Apoptotic chromatin condensation inducer in the nucleus	1341	151.8	6.43		1.057	1.05	1.03	1.048	0.939	1.016	1.097	1.029	1.029	1.006	0.984	0.941	0.955	0.893	0.941	0.965	1.038	0.927		1.046	1.001	1.052	0.977	0.929	0.977		1.07	0.482519	0.11	0.1	0.96	1.02	0.0793768	0.63	0.04	0.2	1.08	0.423859	0.13	0.11	0.87
946	20532400	P38919	IF4A3	Eukaryotic initiation factor 4A-III	411	46.8	6.73		0.921	0.989	0.988	1.03	0.753	1.054	1.021	1.066	1.026	1.005	0.981	0.95	0.982	1.051	1	1.082	1.003	1.161		0.966	0.946	1.038	0.979	1.011	1.082		0.89	0.561694	0.09	-0.16	1.07	0.87	0.226451	0.27	-0.19	0.57	0.96	0.142121	0.41	-0.06	0.39
947	10720244	Q9Y5S9	RBM8A	RNA-binding protein 8A	174	19.9	5.72		1.058	1.008	0.972	0.961	1.339	0.958	0.997	0.936	1.003	1.013	0.991	0.983	1.072	0.993	1.026	0.945	1.09	0.909		1.013	1.086	0.978	0.996	1.03	0.981		1.03	0.079892	0.63	0.05	0.2	1.11	0.112583	0.49	0.15	0.31	1	0.0502726	0.96	0	0.02
948	47117708	P61326	MGN	Protein mago nashi homolog	146	17.2	6.11		1.038	1.049	1.019	1.018	0.951	0.958	1.075	1.021	1.014	1.02	1.026	1.01	1.034	0.924	0.984	0.957	1.001	0.862		1.035	0.976	1.037	1.019	0.981	0.94		1.1	0.556209	0.08	0.14	1.07	1.04	0.115738	0.48	0.05	0.32	1.1	0.512402	0.1	0.14	1.01
949	2500529	Q13838	DX39B	Spliceosome RNA helicase DDX39B	428	49	5.67		0.979	0.988	0.969	1.021	0.964	1.007	0.98	0.97	0.954	1.004	1.015	1.043	0.99	0.988	1.021	1.013	1.041	0.969		0.979	0.997	0.968	1.021	1	1.008		0.97	0.244832	0.25	-0.04	0.6	0.99	0.0676788	0.71	-0.02	0.15	0.96	0.390831	0.15	-0.06	0.82
950	48429165	Q86V81	THOC4	THO complex subunit 4	257	26.9	11.15		1.02	1.02	1.019	0.99	1.118	1.031	1.002	0.97	1.013	1.089	1.049	0.97	1.032	0.905	1.053	1.007	1.052	0.99		1.02	1.047	0.995	1.036	0.996	1.016		1	0.0549892	0.85	0.01	0.07	1.03	0.10884	0.51	0.04	0.3	0.98	0.144247	0.4	-0.03	0.4
951	37999906	Q96FV9	THOC1	THO complex subunit 1	657	75.6	4.98		0.869	1.009	0.95	0.963	0.721	1.011	1.12	1.023	0.922	0.939	0.953	0.954	0.993	1.078	1.004	1.06	0.956	1.241		0.942	0.898	1.021	0.949	1.025	1.085		0.87	0.307017	0.2	-0.2	0.7	0.83	0.301845	0.2	-0.27	0.7	0.94	0.0932912	0.56	-0.09	0.25
952	259016155	Q8NI27	THOC2	THO complex subunit 2	1593	182.7	8.44		0.955	1.011	0.951	1.011	1.001	0.984	1.054	1.022	0.958	0.959	1.034	1.029	0.976	1.019	0.973	1.06	1.005	1.036		0.972	0.999	1.011	1.007	0.989	1.034		0.94	0.627072	0.07	-0.09	1.16	0.97	0.452124	0.12	-0.05	0.92	0.98	0.104445	0.53	-0.03	0.28
953	48474597	Q96J01	THOC3	THO complex subunit 3	351	38.7	6.09		0.89	0.98	0.984	0.995	0.697	0.989	0.977	1.022	1.006	1.038	1.077	1.006	1.022	1.087	1.034	1.081	1.011	1.051		0.952	0.893	1.002	1.04	1.048	1.048		0.91	0.67138	0.06	-0.14	1.23	0.85	0.306947	0.2	-0.23	0.7	0.96	0.428248	0.13	-0.06	0.89
954	73619933	Q99459	CDC5L	Cell division cycle 5-like protein	802	92.2	8.18		1.025	1.006	0.993	0.994	0.957	1.011	1.061	1.017	1.019	0.999	0.983	0.951	0.964	0.899	0.961	1.006	1.009	0.959		1.008	0.987	1.032	0.977	0.941	0.992		1.02	0.129702	0.43	0.02	0.37	1	0.0551683	0.85	-0.01	0.07	1.04	0.409561	0.13	0.06	0.87
955	71153839	O75934	SPF27	Pre-mRNA-splicing factor SPF27	225	26.1	5.66		1.142	1.048	1.077	1.019	1.244	1.004	1.091	0.999	1.023	1.008	0.957	0.991	0.997	0.905	0.989	0.965	0.986	0.845		1.089	1.089	1.038	0.985	0.963	0.932		1.17	0.787747	0.04	0.22	1.41	1.17	0.378841	0.15	0.22	0.82	1.11	0.478409	0.11	0.16	0.96
956	38257903	O43660	PLRG1	Pleiotropic regulator 1	514	57.2	9.17		1.017	1.055	1.009	1.033	0.871	0.978	1.047	0.992	1.068	1.04	0.973	1.009	0.998	0.916	1.005	0.907	0.966	0.968		1.027	0.961	1.036	1.007	0.973	0.947		1.08	0.842371	0.03	0.12	1.51	1.01	0.0578631	0.8	0.02	0.09	1.09	0.768197	0.04	0.13	1.37
957	150438891	Q9P013	CWC15	Spliceosome-associated protein CWC15 homolog	229	26.6	5.71		0.942	1.014	0.998	1.031	0.815	1.042	1.012	1.031	1.007	0.813	0.792	0.712	0.797	0.845	0.871	0.919	0.861	0.971		0.985	0.963	1.017	0.772	0.838	0.917		1.07	0.380127	0.16	0.1	0.8	1.05	0.0851921	0.6	0.07	0.22	1.11	0.799176	0.04	0.15	1.42
958	29840792	Q8WYA6	CTBL1	Beta-catenin-like protein 1	563	65.1	5.05		0.847	0.826	0.873	0.983	0.931	0.775	0.887	0.847	0.906	1.002	0.972	0.958	0.92	0.977	0.99	1.029	1.019	1.119		0.849	0.896	0.88	0.977	0.962	1.056		0.8	0.999397	0	-0.31	2.41	0.85	0.562036	0.08	-0.24	1.07	0.83	0.990076	0.01	-0.26	2.08
959	147744565	P08107	HSP71	Heat shock 70 kDa protein 1A/1B	641	70	5.66		0.978	0.983	0.994	1.026	0.86	1.019	0.974	0.986	1.014	0.972	0.997	1.023	1.006	1.014	1.015	0.977	0.984	0.92		0.985	0.968	0.991	0.997	1.012	0.96		1.03	0.207164	0.29	0.04	0.53	1.01	0.0520374	0.89	0.01	0.05	1.03	0.239589	0.25	0.05	0.6
960	1708307	P54652	HSP72	Heat shock-related 70 kDa protein 2	639	70	5.74		1.009	0.952	1.001	1.044	0.869	1.024	0.998	0.991	1.05	1.011	1.015	1.038	1.044	0.986	1.044	0.954	0.982	0.899		0.988	0.979	1.013	1.021	1.025	0.945		1.05	0.269888	0.23	0.06	0.64	1.04	0.0840499	0.6	0.05	0.22	1.07	0.539446	0.09	0.1	1.04
961	123648	P11142	HSP7C	Heat shock cognate 71 kDa protein	646	70.9	5.52		0.944	0.966	1.014	1.018	0.811	1.022	0.96	0.993	0.975	0.983	0.999	1.014	1.016	1.049	1.037	1.034	0.984	1.043		0.975	0.95	0.976	0.999	1.034	1.02		0.96	0.334372	0.17	-0.07	0.76	0.93	0.152635	0.39	-0.1	0.41	0.96	0.507793	0.1	-0.06	1
962	74735456	O60828	PQBP1	Polyglutamine-binding protein 1	265	30.5	6.33		1.093	1.111	1.025	0.954	1.147	0.977	0.957	1.001	0.932	1.033	1.04	0.994	1.034	0.872	0.947	0.987	0.964	0.828		1.076	1.026	0.963	1.022	0.951	0.926		1.16	0.691182	0.06	0.22	1.26	1.11	0.226516	0.27	0.15	0.57	1.04	0.101547	0.53	0.06	0.28
963	74735242	Q9Y2W2	WBP11	WW domain-binding protein 11	641	70	8.38		0.97	1.001	0.991	0.999	0.884	0.971	1.04	0.986	0.988	0.969	0.949	0.881	0.939	1.025	0.986	1.073	1.015	1.125		0.987	0.951	1.005	0.933	0.983	1.071		0.92	0.649368	0.06	-0.12	1.19	0.89	0.653453	0.06	-0.17	1.2	0.94	0.397791	0.14	-0.09	0.84
964	147744555	Q9BZJ0	CRNL1	Crooked neck-like protein 1	848	100.4	8		0.996	0.921	0.975	0.991	0.862	1.029	0.921	0.965	1.006	1.001	0.972	0.979	0.979	0.994	0.964	1.018	0.978	1.116		0.964	0.961	0.964	0.984	0.979	1.037		0.93	0.313388	0.19	-0.11	0.72	0.93	0.198573	0.31	-0.11	0.51	0.93	0.301967	0.2	-0.11	0.7
965	300669687	Q9ULR0	ISY1	Pre-mRNA-splicing factor ISY1 homolog	285	33	5.17		0.994	1.018	0.888	0.977	0.998	0.94	0.981	1.011	0.952	1.053	0.993	1.024	0.923	1.008	1.008	1.066	1.092	0.945		0.967	0.972	0.981	1.023	0.979	1.034		0.93	0.184072	0.33	-0.1	0.48	0.94	0.228851	0.27	-0.09	0.57	0.95	0.180643	0.34	-0.08	0.47
966	20177874	Q9Y3C6	PPIL1	Peptidyl-prolyl cis-trans isomerase-like 1	166	18.2	7.99		0.898	1.006	1.063	0.998	0.692	0.967	0.959	0.931	0.985	1.004	0.981	1.031	0.99	1.061	1.012	1.073	1.044	1.103		0.989	0.886	0.958	1.005	1.021	1.073		0.92	0.337489	0.18	-0.12	0.75	0.83	0.425275	0.13	-0.28	0.88	0.89	0.992447	0.01	-0.16	2.1
967	13124097	Q9UNP9	PPIE	Peptidyl-prolyl cis-trans isomerase E	301	33.4	5.6		1.093	1.054	1.082	1.048	1.094	1.023	1.167	1.06	1.048	1.078	0.984	1.003	0.879	0.906	1.054	0.832	1.085	0.98		1.076	1.055	1.092	1.022	0.946	0.966		1.11	0.287134	0.21	0.16	0.68	1.09	0.198301	0.31	0.13	0.51	1.13	0.301419	0.2	0.18	0.69
968	74730697	Q8WUD4	CCD12	Coiled-coil domain-containing protein 12	166	19.2	7.34		0.92	1.01	0.987	0.981	1.039	1.044	1.087	1.02	0.986	0.98	0.979	0.928	1.008	0.86	0.973	0.903	1.069	0.786		0.972	1.021	1.031	0.963	0.947	0.919		1.06	0.0905203	0.57	0.08	0.24	1.11	0.208483	0.29	0.15	0.53	1.12	0.229113	0.27	0.17	0.57
969	74762758	Q9NW64	RBM22	Pre-mRNA-splicing factor RBM22	420	46.9	8.54		1.041	1.023	1.047	1.018	1.071	0.973	1.004	1.019	0.982	1.042	1.005	0.976	0.989	1.041	0.986	1.012	1.043	1.132		1.037	1.021	1.002	1.008	1.006	1.062		0.98	0.100154	0.53	-0.03	0.28	0.96	0.1371	0.41	-0.06	0.39	0.94	0.324655	0.18	-0.08	0.74
970	23831082	P41223	BUD31	Protein BUD31 homolog	144	17	8.82		1.075	1.083	1.054	0.98	0.953	1.089	1.047	0.955	1.016	1.059	1.01	1.086	1.061	1.028	1.187	1.017	1.103	0.931		1.071	1.007	1.006	1.052	1.092	1.017		1.05	0.174996	0.35	0.07	0.46	0.99	0.0525427	0.89	-0.01	0.05	0.99	0.0540393	0.86	-0.02	0.07
971	116242995	O60306	AQR	Intron-binding protein aquarius	1485	171.2	6.37		1.062	1.059	0.993	0.95	1.011	0.977	1.105	0.973	1.038	1.07	0.975	0.982	0.975	0.901	0.976	0.999	0.964	1.042		1.038	0.98	1.039	1.009	0.951	1.001		1.04	0.196801	0.31	0.05	0.5	0.98	0.108136	0.49	-0.03	0.31	1.04	0.129889	0.45	0.05	0.35
972	117949790	Q5JPH6	SYEM	Probable glutamate--tRNA ligase, mitochondrial	523	58.7	8.76		1.02	0.941	0.924	0.936	1.156	0.922	0.914	0.886	0.979	1.114	1.014	1.132	1.018	0.978	1.069	0.954	1.012	0.872		0.962	1.005	0.926	1.087	1.022	0.946		1.02	0.0608431	0.77	0.02	0.11	1.06	0.100856	0.53	0.09	0.27	0.98	0.0677951	0.71	-0.03	0.15
973	288558855	P07814	SYEP	Bifunctional glutamate/proline--tRNA ligase	1512	170.5	7.33		0.975	0.983	0.977	1.002	0.941	1.017	0.991	1.004	1.003	0.972	1.008	1.014	1.017	1.039	1.044	1.035	0.993	1.056		0.979	0.987	0.999	0.998	1.033	1.028		0.95	0.675695	0.06	-0.07	1.23	0.96	0.256696	0.24	-0.06	0.62	0.97	0.301842	0.21	-0.04	0.68
974	167016573	Q9H0R6	GATA	Glutamyl-tRNA(Gln) amidotransferase subunit A, mitochondrial	528	57.4	5.68		0.967	1.082	1.001	1.089	0.655	1.102	1.037	1.146	1.138	0.983	1.055	0.974	1.1	1.221	1.236	1.116	1.031	0.87		1.017	0.949	1.107	1.004	1.185	1.006		1.01	0.0520261	0.9	0.02	0.05	0.94	0.0629803	0.75	-0.08	0.13	1.1	0.222596	0.27	0.14	0.56
975	7674164	O75879	GATB	Glutamyl-tRNA(Gln) amidotransferase subunit B, mitochondrial	557	61.8	8.63		1.271	1.18	1.164	1.056	1.226	1.017	1.162	1.083	1.096	1.049	1.045	1.071	0.975	0.889	0.957	1.021	1.009	0.936		1.205	1.099	1.114	1.055	0.94	0.989		1.22	0.993822	0.01	0.29	2.15	1.11	0.319959	0.19	0.15	0.73	1.13	0.879881	0.03	0.17	1.59
976	1351170	P47897	SYQ	Glutamine--tRNA ligase	775	87.7	7.15		1.03	0.99	0.998	1.029	0.929	0.985	0.998	0.968	0.98	0.966	0.985	1.006	1.015	1.023	1.034	0.984	0.967	0.963		1.006	0.981	0.982	0.986	1.024	0.971		1.04	0.647079	0.07	0.05	1.17	1.01	0.0621708	0.76	0.01	0.12	1.01	0.162108	0.38	0.02	0.42
977	74742244	Q5JTZ9	SYAM	Alanine--tRNA ligase, mitochondrial	985	107.3	6.27		1.051	1.029	1.002	1.032	1.121	0.964	0.985	1.013	1.034	1.078	1.02	0.989	0.985	0.942	0.953	0.96	1.079	1.019		1.027	1.039	1.01	1.029	0.96	1.019		1.01	0.0549458	0.85	0.01	0.07	1.02	0.0631821	0.75	0.03	0.12	0.99	0.0562591	0.82	-0.01	0.09
978	115502460	P49588	SYAC	Alanine--tRNA ligase, cytoplasmic	968	106.7	5.53		0.97	0.967	0.985	1.007	0.851	1.014	0.947	1.017	1.025	0.973	1.02	1.038	1.055	1.068	1.076	0.955	1.006	0.896		0.974	0.957	0.996	1.01	1.066	0.953		1.02	0.095692	0.54	0.03	0.27	1	0.0504439	0.95	0.01	0.02	1.05	0.173972	0.34	0.07	0.47
979	74758347	Q6PI48	SYDM	Aspartate--tRNA ligase, mitochondrial	645	73.5	8.02		1.023	1.059	0.982	0.967	1.127	1.045	1.022	0.966	0.988	1.096	1.066	1.05	1.024	0.974	1.035	1.075	1.138	0.985		1.022	1.046	0.992	1.071	1.011	1.066		0.96	0.135233	0.42	-0.06	0.38	0.98	0.0604169	0.77	-0.03	0.11	0.93	0.313751	0.19	-0.1	0.71
980	20178330	P14868	SYDC	Aspartate--tRNA ligase, cytoplasmic	501	57.1	6.55		0.88	0.927	0.924	0.981	0.8	1.015	0.914	1.003	0.971	0.951	0.943	0.956	0.967	1.049	1.019	1.025	0.959	1.176		0.91	0.932	0.963	0.95	1.012	1.053		0.86	0.521721	0.1	-0.21	1.02	0.88	0.23568	0.26	-0.18	0.59	0.91	0.233502	0.26	-0.13	0.59
981	3915059	O43776	SYNC	Asparagine--tRNA ligase, cytoplasmic	548	62.9	6.25		1.036	0.998	1.022	1.062	0.954	1.018	1.023	1.031	0.994	1.005	1.017	1.062	1.061	1.063	1.07	0.961	0.98	0.903		1.019	1.011	1.016	1.028	1.065	0.948		1.07	0.718418	0.05	0.1	1.31	1.07	0.330445	0.18	0.09	0.75	1.07	0.681249	0.06	0.1	1.26
982	313104283	P41250	SYG	Glycine--tRNA ligase	739	83.1	7.03		0.98	0.966	1.008	0.966	0.988	1.003	0.981	0.995	0.98	0.977	1.034	1.049	1.083	1.105	1.033	0.986	0.992	0.977		0.985	0.986	0.986	1.02	1.073	0.985		1	0.05	0.98	0	0.01	1	0.0507926	0.95	0	0.02	1	0.0525121	0.93	0	0.03
983	74752395	Q9BW92	SYTM	Threonine--tRNA ligase, mitochondrial	718	81	7.3		1.052	0.956	1.034	0.952	0.897	0.966	0.99	1.042	1.014	0.922	0.934	0.944	1.074	0.847	0.871	1.02	0.968	1.406		1.014	0.938	1.015	0.933	0.931	1.131		0.9	0.124371	0.45	-0.16	0.34	0.83	0.257105	0.24	-0.27	0.62	0.9	0.125548	0.45	-0.16	0.35
984	60267755	P26639	SYTC	Threonine--tRNA ligase, cytoplasmic	723	83.4	6.67		0.959	0.981	1.012	0.991	0.952	1.006	0.93	0.999	0.996	0.941	0.958	0.988	1.024	1.063	1.051	0.948	0.977	0.927		0.984	0.983	0.975	0.962	1.046	0.951		1.03	0.312787	0.19	0.05	0.71	1.03	0.286183	0.21	0.05	0.68	1.03	0.137215	0.42	0.04	0.38
985	23822219	Q9NP81	SYSM	Serine--tRNA ligase, mitochondrial	518	58.2	8.13		1.089	1.061	0.986	1.02	1.257	0.988	1.06	1.021	1.055	1.064	1.065	1.011	0.963	0.896	1.02	0.936	1.026	0.845		1.045	1.088	1.045	1.047	0.96	0.936		1.12	0.391746	0.14	0.16	0.84	1.16	0.301224	0.2	0.22	0.7	1.12	0.473635	0.11	0.16	0.96
986	19860217	P49591	SYSC	Serine--tRNA ligase, cytoplasmic	514	58.7	6.43		1.05	0.962	1.011	0.98	0.984	0.97	0.981	0.995	0.992	0.993	1.052	1.053	1.076	1.012	1.065	0.921	1.025	0.865		1.008	0.978	0.989	1.033	1.051	0.937		1.08	0.242613	0.25	0.11	0.6	1.04	0.13237	0.43	0.06	0.37	1.06	0.182925	0.33	0.08	0.48
987	20141641	P49589	SYCC	Cysteine--tRNA ligase, cytoplasmic	748	85.4	6.76		0.966	0.945	0.953	0.963	1.004	1.01	0.943	0.989	0.965	1.019	1.109	1.06	1.056	1.011	1.036	0.984	0.979	0.924		0.954	0.992	0.966	1.063	1.035	0.962		0.99	0.0668463	0.72	-0.01	0.14	1.03	0.216782	0.28	0.04	0.55	1	0.0531259	0.88	0.01	0.06
988	20178332	P56192	SYMC	Methionine--tRNA ligase, cytoplasmic	900	101.1	6.16		0.864	0.947	0.969	1.011	0.836	1.085	0.904	1.047	0.952	0.997	0.995	0.986	0.978	1.105	1.028	1.058	0.974	1.168		0.927	0.977	0.968	0.992	1.037	1.066		0.87	0.516027	0.1	-0.2	1.01	0.92	0.150074	0.39	-0.13	0.41	0.91	0.26183	0.23	-0.14	0.63
989	12644177	P26640	SYVC	Valine--tRNA ligase	1264	140.4	7.59		0.984	0.971	1	1.02	1.059	0.98	0.981	0.965	0.972	1	1.044	1	1.051	1	1.011	0.932	0.995	0.909		0.985	1.02	0.973	1.015	1.021	0.945		1.04	0.286768	0.22	0.06	0.66	1.08	0.52727	0.1	0.11	1.02	1.03	0.175127	0.35	0.04	0.46
990	48428689	Q9P2J5	SYLC	Leucine--tRNA ligase, cytoplasmic	1176	134.4	7.3		0.951	1.003	0.977	1.023	0.811	0.999	0.985	1.043	1.019	0.98	1.02	0.982	1.014	1.069	1.005	0.997	1.041	1.124		0.977	0.944	1.015	0.994	1.029	1.054		0.93	0.433676	0.13	-0.11	0.9	0.9	0.273091	0.23	-0.16	0.65	0.96	0.149043	0.39	-0.05	0.4
991	239938717	P41252	SYIC	Isoleucine--tRNA ligase, cytoplasmic	1262	144.4	6.15		0.987	0.983	0.951	0.989	0.847	1.041	0.994	1.034	0.991	0.974	0.979	0.96	1.003	1.008	0.963	0.997	0.971	1.053		0.974	0.959	1.006	0.971	0.991	1.007		0.97	0.215816	0.28	-0.05	0.55	0.95	0.113178	0.49	-0.07	0.31	1	0.050137	0.97	0	0.01
992	94730583	Q9NSE4	SYIM	Isoleucine--tRNA ligase, mitochondrial	1012	113.7	7.2		1.021	1	1.008	1.017	1.062	0.997	0.993	1.022	0.998	1.051	1.016	1.02	1.054	1.024	1.045	1.071	0.995	1.009		1.01	1.025	1.005	1.029	1.041	1.025		0.98	0.0916101	0.56	-0.02	0.25	1	0.05	0.99	0	0	0.98	0.119279	0.46	-0.03	0.34
993	20178333	Q15046	SYK	Lysine--tRNA ligase	597	68	6.35		1.002	1.014	1.05	1.013	1.06	1	1.008	0.999	1.006	1.01	1.02	1.04	1.026	0.987	1.054	0.976	1.025	0.903		1.022	1.025	1.005	1.023	1.022	0.968		1.06	0.266021	0.23	0.08	0.64	1.06	0.271735	0.23	0.08	0.64	1.04	0.167912	0.36	0.05	0.44
994	74744409	Q5T160	SYRM	Probable arginine--tRNA ligase, mitochondrial	578	65.5	8.21		0.849	0.939	0.854	0.964	0.622	0.848	0.837	0.917	0.862	1.042	1.036	1.001	0.999	1.034	1.004	1.028	0.998	0.98		0.88	0.811	0.872	1.027	1.012	1.002		0.88	0.923778	0.02	-0.19	1.7	0.81	0.421685	0.13	-0.3	0.88	0.87	0.987092	0.01	-0.2	2.05
995	20178331	P54136	SYRC	Arginine--tRNA ligase, cytoplasmic	660	75.3	6.68		0.901	0.964	1.013	0.977	0.728	1.02	0.937	1.006	1.042	0.994	1.021	1.012	1.05	1.074	1.02	1.051	1.019	1.102		0.959	0.908	0.995	1.009	1.048	1.057		0.91	0.610626	0.07	-0.14	1.13	0.86	0.319368	0.19	-0.22	0.72	0.94	0.319765	0.19	-0.09	0.73
996	135123	P12081	SYHC	Histidine--tRNA ligase, cytoplasmic	509	57.4	5.88		1.081	0.975	1.047	0.972	0.801	1.027	0.956	0.989	1.004	0.987	1.026	1.029	1.007	1.051	1.061	0.991	1.009	0.973		1.034	0.933	0.983	1.014	1.04	0.991		1.04	0.235469	0.26	0.06	0.59	0.94	0.126995	0.45	-0.09	0.35	0.99	0.0722165	0.66	-0.01	0.18
997	12643946	Q9Y285	SYFA	Phenylalanine--tRNA ligase alpha subunit	508	57.5	7.8		1.155	1.092	1.001	0.985	1.375	0.993	0.996	1.045	1.046	0.997	0.958	1.018	1.024	0.96	1.019	0.992	0.98	0.867		1.083	1.118	1.029	0.991	1.001	0.946		1.14	0.564391	0.08	0.19	1.07	1.18	0.227431	0.27	0.24	0.57	1.09	0.436369	0.13	0.12	0.9
998	55976225	O95363	SYFM	Phenylalanine--tRNA ligase, mitochondrial	451	52.3	7.46		1.096	0.991	1.01	1.035	1.003	1.003	1.09	1.056	1.014	1.371	1.248	1.034	1.076	0.945	1.089	1.169	1.127	0.905		1.032	1.014	1.053	1.218	1.036	1.067		0.97	0.0669263	0.71	-0.05	0.15	0.95	0.0944053	0.55	-0.07	0.26	0.99	0.0529066	0.88	-0.02	0.06
999	296452943	Q9NSD9	SYFB	Phenylalanine--tRNA ligase beta subunit	589	66.1	6.84		0.915	1.013	1.011	0.993	1.036	0.974	0.969	0.994	1.011	0.975	0.978	0.977	0.987	1.031	1.018	1.019	0.935	1.002		0.98	1.001	0.992	0.977	1.012	0.985		0.99	0.0515646	0.9	-0.01	0.04	1.02	0.0776714	0.64	0.02	0.19	1.01	0.0564889	0.83	0.01	0.08
1000	13638438	P54577	SYYC	Tyrosine--tRNA ligase, cytoplasmic	528	59.1	7.05		0.944	0.964	0.986	1.003	0.872	1.025	0.942	0.977	1.007	1.028	1.04	1.061	1.038	1.095	1.037	1.012	1.001	1.017		0.965	0.966	0.975	1.043	1.057	1.01		0.96	0.879008	0.02	-0.07	1.62	0.96	0.141314	0.41	-0.06	0.38	0.97	0.394936	0.14	-0.05	0.84
1001	50401709	Q9Y2Z4	SYYM	Tyrosine--tRNA ligase, mitochondrial	477	53.2	8.98		1.061	1.099	0.951	1.017	0.854	1.001	1.032	1.039	1.071	1.281	1.181	0.922	1.051	1.069	0.991	1.138	1.019	0.996		1.037	0.957	1.047	1.128	1.037	1.051		0.99	0.0553559	0.83	-0.02	0.08	0.91	0.257346	0.24	-0.13	0.62	1	0.0508196	0.94	-0.01	0.03
1002	135191	P23381	SYWC	Tryptophan--tRNA ligase, cytoplasmic	471	53.1	6.23		0.912	0.928	0.994	1.047	0.881	1.113	0.94	1.097	0.996	0.917	0.999	1.042	1.025	1.141	1.085	1.027	0.972	0.987		0.945	1.014	1.011	0.986	1.083	0.996		0.95	0.358566	0.16	-0.08	0.79	1.02	0.0568745	0.81	0.03	0.09	1.02	0.0601058	0.77	0.02	0.11
1003	13124451	Q99575	POP1	Ribonucleases P/MRP protein subunit POP1	1024	114.6	9.22		0.927	0.839	1.052	1.056	0.796	0.95	1.081	0.864	1.009	0.892	1.037	1.047	0.969	0.915	0.915	0.862	0.995	0.962		0.939	0.934	0.985	0.992	0.933	0.94		1	0.0500197	1	0	0	0.99	0.0505258	0.95	-0.01	0.02	1.05	0.0884581	0.58	0.07	0.24
1004	83305638	P78345	RPP38	Ribonuclease P protein subunit p38	283	31.8	9.92		1.068	0.975	0.95	0.976	1.119	0.951	1.036	0.945	1.016	1.044	0.963	0.942	0.992	1.01	0.964	1.043	1.005	0.962		0.998	1.015	0.999	0.983	0.988	1.004		0.99	0.0520902	0.89	-0.01	0.05	1.01	0.0539279	0.85	0.02	0.07	1	0.0520349	0.91	-0.01	0.04
1005	108860974	O75817	POP7	Ribonuclease P protein subunit p20	140	15.6	8.94		1.077	0.919	0.983	1.004	1.071	0.939	0.879	0.86	0.968	1.119	1.023	0.955	0.964	1.033	0.953	1.021	1.021	0.945		0.993	1.005	0.902	1.032	0.983	0.996		1	0.0503491	0.96	0	0.02	1.01	0.0541269	0.85	0.01	0.07	0.91	0.549945	0.09	-0.14	1.05
1006	13124514	P78346	RPP30	Ribonuclease P protein subunit p30	268	29.3	8.91		0.986	0.956	0.925	1.003	1.07	0.991	1.063	1.079	1.025	1.019	0.914	0.944	0.978	1.18	1.058	1.154	0.987	1.597		0.956	1.021	1.056	0.959	1.072	1.246		0.77	0.320589	0.19	-0.38	0.73	0.82	0.213446	0.29	-0.29	0.54	0.85	0.167715	0.36	-0.24	0.45
1007	238054370	O75818	RPP40	Ribonuclease P protein subunit p40	363	41.8	6.67		1.087	0.998	1.039	0.957	1.209	0.974	1.037	0.929	0.937	0.986	1.01	0.891	0.957	0.927	0.939	1.083	0.973	0.981		1.042	1.046	0.968	0.962	0.941	1.012		1.03	0.100742	0.54	0.04	0.27	1.03	0.0657351	0.72	0.05	0.14	0.96	0.135404	0.42	-0.07	0.38
1008	41017788	Q9BQ52	RNZ2	Zinc phosphodiesterase ELAC protein 2	826	92.2	7.9		1.036	0.927	1.006	0.97	1.048	0.962	0.992	1.019	1.012	1.06	1.029	1.02	1.054	1.017	1.028	0.994	1.008	0.967		0.99	0.994	1.008	1.036	1.033	0.99		1	0.05	1	0	0	1	0.0519011	0.91	0.01	0.04	1.02	0.217806	0.29	0.03	0.54
1009	296452848	Q96Q11	TRNT1	CCA tRNA nucleotidyltransferase 1, mitochondrial	434	50.1	8.1		0.956	0.856	1.04	1.097	0.875	1.034	1.002	0.991	1.161	1.052	1.017	1.07	1.005	0.977	0.944	0.911	0.979	0.938		0.951	1.002	1.051	1.046	0.975	0.943		1.01	0.0521195	0.89	0.01	0.05	1.06	0.129436	0.44	0.09	0.36	1.12	0.409878	0.14	0.16	0.86
1010	108862045	O43592	XPOT	Exportin-T	962	109.9	5.39		0.915	0.891	0.994	0.954	1.088	0.93	0.912	0.953	0.967	0.902	0.925	1.04	0.962	1.197	0.98	1.033	0.949	1.045		0.933	0.991	0.944	0.956	1.046	1.009		0.93	0.376232	0.16	-0.11	0.8	0.98	0.0604056	0.77	-0.03	0.12	0.94	0.423392	0.13	-0.1	0.87
1011	74734245	Q9HAV4	XPO5	Exportin-5	1204	136.2	5.8		1.003	1.005	1.032	1.026	1.073	1.011	0.973	0.947	1.005	0.975	1.005	0.998	1.064	1.08	1.042	0.985	1	1.041		1.013	1.037	0.975	0.993	1.062	1.009		1	0.0546448	0.82	0.01	0.09	1.03	0.185778	0.32	0.04	0.49	0.97	0.273167	0.23	-0.05	0.64
1012	55584035	P68104	EF1A1	Elongation factor 1-alpha 1	462	50.1	9.01		0.981	0.956	1.028	1.026	0.837	1.026	0.937	0.975	0.999	0.987	1.015	1.018	1.052	1.066	1.066	0.986	1.009	0.984		0.988	0.963	0.971	1.007	1.061	0.993		1	0.0552337	0.85	-0.01	0.07	0.97	0.0739461	0.66	-0.04	0.18	0.98	0.185126	0.32	-0.03	0.49
1013	68052989	O14980	XPO1	Exportin-1	1071	123.3	6.06		0.961	0.943	0.989	1.004	0.994	1	0.936	0.958	1.005	0.846	0.894	0.951	0.98	0.996	0.934	0.949	0.94	0.974		0.964	0.999	0.966	0.897	0.97	0.954		1.01	0.0881133	0.6	0.01	0.22	1.05	0.966807	0.01	0.07	1.86	1.01	0.0799042	0.64	0.02	0.2
1014	74752718	Q9H814	PHAX	Phosphorylated adapter RNA export protein	394	44.4	5.4		0.968	0.967	0.969	0.973	0.77	0.976	0.923	0.927	0.919	0.935	0.974	0.975	0.952	0.978	0.953	0.999	0.919	1.007		0.968	0.906	0.923	0.961	0.961	0.975		0.99	0.0566252	0.82	-0.01	0.09	0.93	0.145163	0.41	-0.11	0.39	0.95	0.407963	0.14	-0.08	0.85
1015	1708393	P54105	ICLN	Methylosome subunit pICln	237	26.2	4.11		1.085	1.059	1.204	1.049	1.195	1.07	1.007	1.086	1.136	0.95	1.057	1.003	1.026	0.978	1.044	0.949	0.992	0.914		1.116	1.105	1.076	1.003	1.016	0.952		1.17	0.845992	0.03	0.23	1.51	1.16	0.784806	0.04	0.22	1.4	1.13	0.737322	0.05	0.18	1.33
1016	32171585	O14744	ANM5	Protein arginine N-methyltransferase 5	637	72.6	6.29		0.959	0.95	0.992	0.965	0.868	0.973	0.969	0.96	1.033	0.968	1.009	1.066	1.015	1.048	0.999	0.993	0.986	0.919		0.967	0.935	0.987	1.014	1.021	0.966		1	0.0501481	0.98	0	0.01	0.97	0.111335	0.49	-0.05	0.31	1.02	0.0938491	0.56	0.03	0.25
1017	20981701	Q14974	IMB1	Importin subunit beta-1	876	97.1	4.78		0.906	0.942	0.971	0.99	0.776	1.033	0.928	1.005	0.971	0.953	0.966	0.966	1.006	1.031	0.994	0.989	0.937	1.005		0.939	0.933	0.968	0.962	1.01	0.977		0.96	0.252463	0.24	-0.06	0.61	0.95	0.0808908	0.62	-0.07	0.21	0.99	0.0594327	0.77	-0.01	0.11
1018	74731412	Q96D46	NMD3	60S ribosomal export protein NMD3	503	57.6	7.14		0.958	1.014	0.979	1.008	1.092	1.021	0.931	0.963	0.993	0.919	1.034	1.076	1.082	0.934	1.045	0.944	1.029	0.917		0.984	1.041	0.962	1.01	1.021	0.963		1.02	0.0837542	0.62	0.03	0.21	1.08	0.402257	0.14	0.11	0.84	1	0.050073	0.98	0	0.01
1019	74732911	Q9BRP8	WIBG	Partner of Y14 and mago	204	22.6	9.45		1.386	1.13	1.261	1.319	1.361	1.276	1.082	1.204	1.341	1.002	0.998	0.993	0.995	0.899	0.906	1.096	1.029	0.915		1.259	1.319	1.209	0.998	0.933	1.013		1.24	0.701487	0.05	0.31	1.27	1.3	0.99598	0.01	0.38	2.2	1.19	0.512293	0.1	0.25	1
1020	21431807	P24386	RAE1	Rab proteins geranylgeranyltransferase component A 1	653	73.4	4.75		1.049	0.931	1.008	0.973	1.008	1.102	1.065	1.031	1.032	0.963	0.975	0.92	1.037	0.872	1.023	0.991	0.997	0.842		0.996	1.028	1.043	0.953	0.977	0.943		1.06	0.130919	0.44	0.08	0.36	1.09	0.243768	0.26	0.12	0.59	1.11	0.436601	0.13	0.14	0.89
1021	54039791	P63279	UBC9	SUMO-conjugating enzyme UBC9	158	18	8.66		0.82	0.935	1.012	1.09	0.517	1.1	0.951	1.132	1.015	0.953	0.991	0.993	0.985	1.098	1.036	1.032	0.958	1.032		0.922	0.902	1.033	0.979	1.04	1.007		0.92	0.260779	0.23	-0.13	0.63	0.9	0.0814122	0.62	-0.16	0.21	1.03	0.0712175	0.69	0.04	0.16
1022	378405233	P61956	SUMO2	Small ubiquitin-related modifier 2	95	10.9	5.5		0.956	1.013	1.003	1.035	0.958	1.07	0.988	0.978	1.016	1.069	1.021	1.052	1.143	1.088	1.066	1.015	1.085	1.074		0.991	1.021	0.994	1.047	1.099	1.058		0.94	0.601701	0.07	-0.09	1.13	0.97	0.144958	0.41	-0.05	0.39	0.94	0.671118	0.06	-0.09	1.22
1023	52783799	P63165	SUMO1	Small ubiquitin-related modifier 1	101	11.5	5.52		1.044	1.052	1.009	0.992	1.167	1.019	1.03	1.066	1.066	1.067	0.99	1.001	1.097	0.952	0.995	0.921	0.987	0.831		1.035	1.059	1.054	1.02	1.015	0.913		1.13	0.665146	0.06	0.18	1.22	1.16	0.485396	0.11	0.21	0.97	1.15	0.786162	0.04	0.21	1.41
1024	2498924	Q16637	SMN	Survival motor neuron protein	294	31.8	6.55		1.047	0.986	0.997	0.93	0.944	1.027	0.929	0.981	0.918	1.091	1.086	1.122	1.054	0.988	1.027	1.055	0.975	0.902		1.01	0.967	0.943	1.1	1.023	0.978		1.03	0.097955	0.54	0.05	0.27	0.99	0.0545008	0.85	-0.02	0.07	0.96	0.106846	0.51	-0.05	0.29
1025	12643886	Q9UHI6	DDX20	Probable ATP-dependent RNA helicase DDX20	824	92.2	6.95		1.067	0.944	1.021	1.049	0.892	1.065	1.029	1.033	1.106	0.992	0.951	0.947	0.958	0.982	0.914	0.953	0.956	0.99		1.011	1.002	1.056	0.963	0.951	0.966		1.05	0.204427	0.3	0.07	0.52	1.04	0.0938467	0.56	0.05	0.25	1.09	0.839901	0.03	0.13	1.5
1026	322510030	P57678	GEMI4	Gem-associated protein 4	1058	120	6.04		0.88	1.004	1.004	0.986	0.567	1.016	0.977	0.891	0.926	0.959	1.014	1.031	1.023	1.101	1.04	1.039	1.014	1.076		0.963	0.857	0.932	1.002	1.055	1.043		0.92	0.383641	0.15	-0.12	0.82	0.82	0.226543	0.27	-0.28	0.57	0.89	0.90239	0.02	-0.16	1.64
1027	296439335	Q8TEQ6	GEMI5	Gem-associated protein 5	1508	168.5	6.62		0.96	0.922	0.913	0.942	1.088	0.888	0.939	1.032	0.933	1.064	1.12	1.081	1.081	1.013	1.02	0.948	1.037	0.866		0.932	0.973	0.968	1.088	1.038	0.95		0.98	0.0631024	0.74	-0.03	0.13	1.02	0.0594115	0.79	0.03	0.1	1.02	0.059994	0.78	0.03	0.11
1028	34921901	Q8WXD5	GEMI6	Gem-associated protein 6	167	18.8	5.12		0.995	0.926	0.99	0.962	0.988	0.97	0.944	0.967	1.019	0.914	1.03	1.032	0.958	0.991	1.04	0.921	0.932	1.003		0.97	0.973	0.977	0.992	0.996	0.952		1.02	0.0801843	0.62	0.03	0.21	1.02	0.116371	0.47	0.03	0.32	1.03	0.108646	0.51	0.04	0.29
1029	34922127	Q9H840	GEMI7	Gem-associated protein 7	131	14.5	7.4		0.935	0.907	1.096	0.843	1.362	1.034	0.845	0.948	0.916	0.803	0.932	0.871	0.934	0.917	0.918	0.804	0.803	0.832		0.98	1.08	0.903	0.869	0.923	0.813		1.21	0.728463	0.05	0.27	1.31	1.33	0.378132	0.15	0.41	0.81	1.11	0.735038	0.05	0.15	1.33
1030	12643951	Q9Y3F4	STRAP	Serine-threonine kinase receptor-associated protein	350	38.4	5.12		0.959	0.95	0.992	1.005	0.827	1.042	0.942	1.03	1.005	0.955	1.031	1.007	1.026	1.075	1.076	1.039	1.006	0.988		0.967	0.958	0.992	0.998	1.059	1.011		0.96	0.547301	0.09	-0.06	1.04	0.95	0.115723	0.48	-0.08	0.32	0.98	0.0928395	0.58	-0.03	0.24
1031	23503065	O75822	EIF3J	Eukaryotic translation initiation factor 3 subunit J	258	29	4.83		0.95	1.016	1.014	1.078	0.871	1.07	0.993	0.981	1.032	0.913	0.977	1.021	0.985	1.074	0.976	0.999	0.95	1.188		0.993	1.006	1.002	0.97	1.012	1.045		0.95	0.100917	0.53	-0.07	0.28	0.96	0.0665388	0.71	-0.06	0.15	0.96	0.0861759	0.59	-0.06	0.23
1032	2494895	Q13347	EIF3I	Eukaryotic translation initiation factor 3 subunit I	325	36.5	5.64		0.998	0.991	1.031	1.037	1.007	1.054	0.941	1.014	0.997	1.005	1.061	1.033	1.028	1.026	1.027	0.951	0.986	0.964		1.007	1.032	0.984	1.033	1.027	0.967		1.04	0.635274	0.07	0.06	1.18	1.07	0.927245	0.02	0.09	1.73	1.02	0.102853	0.52	0.03	0.28
1033	6685512	O15372	EIF3H	Eukaryotic translation initiation factor 3 subunit H	352	39.9	6.54		0.961	1.003	1.008	1.015	0.801	1.035	0.914	0.934	0.948	0.991	1.005	1.046	1.074	0.977	1.041	0.988	1.027	1.013		0.991	0.95	0.932	1.014	1.031	1.009		0.98	0.150007	0.38	-0.03	0.42	0.94	0.115674	0.48	-0.09	0.32	0.92	0.994321	0.01	-0.11	2.17
1034	23503064	O75821	EIF3G	Eukaryotic translation initiation factor 3 subunit G	320	35.6	6.13		0.989	0.989	1.063	1.02	0.799	1.064	0.992	0.979	0.995	1.008	1.005	1.055	1.064	1.029	1.034	0.992	1.012	0.901		1.014	0.961	0.989	1.023	1.042	0.969		1.05	0.174199	0.34	0.07	0.46	0.99	0.0508645	0.93	-0.01	0.03	1.02	0.0861554	0.59	0.03	0.23
1035	6685511	O00303	EIF3F	Eukaryotic translation initiation factor 3 subunit F	357	37.5	5.45		1.017	0.989	1.023	0.992	1.022	0.983	0.964	0.945	0.937	1.001	1.069	1.077	1.04	0.995	1.002	0.971	1.039	0.903		1.01	0.999	0.949	1.049	1.012	0.971		1.04	0.150152	0.39	0.06	0.41	1.03	0.100377	0.53	0.04	0.28	0.98	0.0824226	0.61	-0.03	0.21
1036	41019126	P60228	EIF3E	Eukaryotic translation initiation factor 3 subunit E	445	52.2	6.04		0.978	1.018	1.008	0.984	0.874	0.995	0.955	0.991	0.991	1.002	0.997	1.049	1.037	1.011	1.017	1.07	1.026	1.016		1.001	0.951	0.979	1.016	1.021	1.037		0.97	0.377871	0.16	-0.05	0.81	0.92	0.478815	0.11	-0.12	0.96	0.94	0.737995	0.05	-0.08	1.33
1037	6685526	O15371	EIF3D	Eukaryotic translation initiation factor 3 subunit D	548	63.9	6.05		0.976	0.996	1.003	0.981	1.004	0.988	0.951	0.976	0.936	0.992	1.025	0.985	1.006	1.019	1.066	0.961	1.02	0.901		0.992	0.991	0.955	1.001	1.031	0.961		1.03	0.133742	0.42	0.05	0.37	1.03	0.129607	0.43	0.05	0.36	0.99	0.0529167	0.88	-0.01	0.06
1038	6685539	Q99613	EIF3C	Eukaryotic translation initiation factor 3 subunit C	913	105.3	5.68		0.908	0.969	1.018	1.016	0.85	1.006	0.915	0.954	0.972	0.986	1.012	1.009	1.031	1.061	1.036	1.013	0.993	1.149		0.965	0.957	0.947	1.002	1.043	1.052		0.92	0.28975	0.21	-0.12	0.67	0.91	0.235572	0.26	-0.14	0.58	0.9	0.472014	0.11	-0.15	0.94
1039	218512094	P55884	EIF3B	Eukaryotic translation initiation factor 3 subunit B	814	92.4	5		0.926	0.96	0.986	1.029	0.818	1.037	0.953	1.008	0.986	0.927	0.976	0.991	0.987	1.054	0.998	1.005	0.985	1.092		0.957	0.961	0.982	0.965	1.013	1.028		0.93	0.43116	0.13	-0.1	0.89	0.94	0.128276	0.45	-0.1	0.35	0.96	0.22264	0.28	-0.07	0.55
1040	6685537	Q14152	EIF3A	Eukaryotic translation initiation factor 3 subunit A	1382	166.5	6.79		0.968	0.97	0.999	1.01	0.973	1.006	0.931	0.953	0.954	0.984	0.992	0.998	1.025	1.025	1.008	1.014	1.002	0.999		0.979	0.996	0.946	0.991	1.019	1.005		0.97	0.589144	0.08	-0.04	1.1	0.99	0.105249	0.55	-0.01	0.26	0.94	0.99993	0	-0.09	2.58
1041	1352425	P47813	IF1AX	Eukaryotic translation initiation factor 1A, X-chromosomal	144	16.5	5.24		0.955	0.969	0.944	1.006	0.748	0.994	0.948	1.007	0.967	0.936	1.029	1.05	1.004	1.033	1.069	0.999	1.074	0.85		0.956	0.916	0.974	1.005	1.035	0.974		0.98	0.0578908	0.8	-0.03	0.1	0.94	0.0817263	0.62	-0.09	0.21	1	0.05	1	0	0
1042	1174483	P41567	EIF1	Eukaryotic translation initiation factor 1	113	12.7	7.44		1.015	0.954	1.057	1.076	1.115	1.204	0.912	0.922	1.326	0.828	0.859	0.896	0.939	1.166	0.999	1.119	0.874	1.367		1.009	1.132	1.054	0.861	1.035	1.12		0.9	0.113048	0.49	-0.15	0.31	1.01	0.0507075	0.94	0.01	0.03	0.94	0.0619916	0.75	-0.09	0.12
1043	27735202	P55010	IF5	Eukaryotic translation initiation factor 5	431	49.2	5.58		0.946	0.966	0.937	0.976	1.005	1.049	0.934	1.016	0.995	1.007	1.01	1.031	1.06	1.083	1.117	0.989	0.958	1.065		0.95	1.01	0.982	1.016	1.087	1.004		0.95	0.338379	0.17	-0.08	0.76	1.01	0.052628	0.88	0.01	0.05	0.98	0.082227	0.61	-0.03	0.22
1044	124200	P05198	IF2A	Eukaryotic translation initiation factor 2 subunit 1	315	36.1	5.08		1.018	1.033	1.026	1.02	0.947	1.057	1.027	1.039	1.052	0.993	0.99	0.995	0.998	1.025	1.002	1.033	1.014	1.035		1.026	1.008	1.039	0.993	1.009	1.027		1	0.0516772	0.83	0	0.08	0.98	0.0856755	0.59	-0.03	0.23	1.01	0.21185	0.28	0.02	0.55
1045	12644154	P20042	IF2B	Eukaryotic translation initiation factor 2 subunit 2	333	38.4	5.8		0.904	0.981	0.998	1.031	0.71	1.034	0.912	1	0.989	0.974	0.986	0.986	1.03	1.104	1.045	1.086	1.002	1.277		0.961	0.925	0.967	0.982	1.06	1.122		0.86	0.414893	0.14	-0.22	0.86	0.82	0.281172	0.22	-0.28	0.66	0.86	0.393679	0.15	-0.21	0.84
1046	729816	P41091	IF2G	Eukaryotic translation initiation factor 2 subunit 3	472	51.1	8.4		1.035	1.002	0.994	1.001	0.958	1.045	0.999	0.967	1.016	1.053	1.025	1.034	1.008	1.011	1.032	1.045	1.027	1.024		1.011	1.001	0.994	1.037	1.017	1.032		0.98	0.287988	0.21	-0.03	0.67	0.97	0.205344	0.3	-0.04	0.52	0.96	0.604836	0.07	-0.05	1.13
1047	2494303	Q14232	EI2BA	Translation initiation factor eIF-2B subunit alpha	305	33.7	7.33		0.935	0.968	1.001	1.03	0.942	1.008	0.921	0.902	1.13	0.907	1.021	1.006	1.04	1.06	1.031	1.029	0.922	0.933		0.968	0.993	0.984	0.978	1.044	0.961		1.01	0.0534434	0.87	0.01	0.06	1.03	0.109742	0.5	0.05	0.3	1.02	0.0587092	0.79	0.03	0.1
1048	6226858	P49770	EI2BB	Translation initiation factor eIF-2B subunit beta	351	39	6.16		1.047	0.933	1.101	1.299	0.682	1.161	1.054	1.099	0.945	0.926	0.952	0.982	0.958	1.104	1.009	0.961	0.97	1.075		1.027	1.047	1.033	0.953	1.024	1.002		1.03	0.0676615	0.7	0.04	0.15	1.05	0.055956	0.82	0.06	0.08	1.03	0.0801226	0.62	0.04	0.21
1049	28381357	Q9UI10	EI2BD	Translation initiation factor eIF-2B subunit delta	523	57.5	9.38		0.997	0.906	0.95	1.028	0.992	1.033	0.891	0.971	0.999	0.93	1.049	0.982	1.058	0.952	1.029	0.938	1.003	0.869		0.951	1.018	0.953	0.987	1.013	0.937		1.01	0.0595772	0.78	0.02	0.11	1.09	0.457662	0.12	0.12	0.93	1.02	0.0607586	0.76	0.03	0.12
1050	18203317	Q9NR50	EI2BG	Translation initiation factor eIF-2B subunit gamma	452	50.2	6.47		1.089	1.079	1.062	0.996	1.063	1.027	1.071	1.005	1.035	1.06	1.058	1.084	1.087	1.025	1.084	1.008	1.09	0.908		1.077	1.029	1.037	1.068	1.065	1.002		1.07	0.26552	0.23	0.1	0.64	1.03	0.0748883	0.65	0.04	0.18	1.04	0.0921405	0.56	0.05	0.25
1051	160359049	Q13144	EI2BE	Translation initiation factor eIF-2B subunit epsilon	721	80.3	5.08		1.057	0.968	1.037	1.069	1.19	0.969	0.957	0.991	1.058	0.953	0.922	0.987	0.963	0.948	0.975	0.988	0.991	0.838		1.021	1.076	1.002	0.954	0.962	0.939		1.09	0.272367	0.22	0.12	0.65	1.15	0.352305	0.17	0.2	0.78	1.07	0.175948	0.34	0.09	0.47
1052	269849752	O60841	IF2P	Eukaryotic translation initiation factor 5B	1220	138.7	5.49		0.983	0.997	0.969	1.007	0.909	1.011	0.971	0.986	1.019	1.026	1.045	1.015	1.053	1.026	1.011	1.032	1.023	0.955		0.983	0.976	0.992	1.029	1.03	1.003		0.98	0.116008	0.47	-0.03	0.33	0.97	0.096174	0.54	-0.04	0.27	0.99	0.0663652	0.71	-0.02	0.15
1053	48428276	O43432	IF4G3	Eukaryotic translation initiation factor 4 gamma 3	1585	176.5	5.38		1.04	1.001	0.89	0.94	1.044	1.005	0.951	0.9	0.996	1.059	1.043	1.001	0.968	0.976	0.997	1.005	1.096	0.958		0.977	0.997	0.949	1.034	0.98	1.02		0.96	0.104594	0.52	-0.06	0.28	0.98	0.072157	0.67	-0.03	0.18	0.93	0.276636	0.22	-0.1	0.66
1054	294862538	Q04637	IF4G1	Eukaryotic translation initiation factor 4 gamma 1	1599	175.4	5.33		0.985	0.99	1.012	1	0.896	1.015	0.975	0.999	0.99	0.982	1.008	0.993	1.014	1.034	1.027	1.008	1.019	1.032		0.995	0.97	0.988	0.994	1.025	1.02		0.98	0.572628	0.09	-0.03	1.04	0.95	0.23775	0.26	-0.07	0.58	0.97	0.83944	0.03	-0.05	1.49
1055	30315906	P78344	IF4G2	Eukaryotic translation initiation factor 4 gamma 2	907	102.3	7.14		1.016	1.034	1.012	1.045	1.043	1.032	0.985	1.026	0.991	1.013	1.029	1.027	1.022	1.005	1.003	1.003	1.012	0.989		1.021	1.04	1	1.023	1.01	1.001		1.02	0.498703	0.12	0.03	0.93	1.04	0.992593	0.01	0.05	2.06	1	0.0505117	0.95	0	0.02
1056	1352435	P06730	IF4E	Eukaryotic translation initiation factor 4E	217	25.1	6.15		0.762	1.135	1.025	1.108	0.516	1.337	0.889	1.081	1.143	0.891	0.923	0.982	0.938	1.087	0.973	1.01	0.917	1.117		0.974	0.987	1.038	0.932	1	1.014		0.96	0.0609776	0.76	-0.06	0.12	0.97	0.05123	0.92	-0.04	0.04	1.02	0.0566961	0.82	0.03	0.09
1057	29839256	O60573	IF4E2	Eukaryotic translation initiation factor 4E type 2	245	28.3	8.88		1.109	1.063	1.048	1.059	0.969	1.016	0.97	1.054	1.021	0.884	0.913	0.869	0.869	0.971	0.838	0.892	0.918	1.105		1.073	1.015	1.015	0.889	0.893	0.972		1.1	0.278405	0.22	0.14	0.66	1.04	0.0884715	0.58	0.06	0.23	1.04	0.0890688	0.58	0.06	0.24
1058	46397463	P60842	IF4A1	Eukaryotic initiation factor 4A-I	406	46.1	5.48		1.067	1.018	1.036	1.06	1.267	1.064	0.994	0.998	0.967	0.969	1.089	1.075	1.058	0.966	1.066	0.931	1.037	0.882		1.04	1.131	0.986	1.044	1.03	0.95		1.09	0.419554	0.13	0.13	0.88	1.19	0.533753	0.09	0.25	1.03	1.04	0.114138	0.48	0.05	0.31
1059	45645183	Q14240	IF4A2	Eukaryotic initiation factor 4A-II	407	46.4	5.48		0.955	0.95	0.967	0.863	1.052	0.875	0.973	0.974	0.944	0.897	0.916	1.065	0.977	0.888	0.955	0.823	0.931	0.857		0.957	0.93	0.964	0.959	0.94	0.87		1.1	0.697731	0.05	0.14	1.27	1.07	0.132255	0.43	0.1	0.36	1.11	0.733536	0.05	0.15	1.31
1060	205371761	P23588	IF4B	Eukaryotic translation initiation factor 4B	611	69.1	5.73		0.992	0.959	0.986	0.963	1.168	0.974	0.924	0.957	0.932	0.98	1.043	1.035	1.045	1.005	1.059	0.963	1.017	0.917		0.979	1.035	0.938	1.019	1.036	0.966		1.01	0.069308	0.69	0.02	0.16	1.07	0.14825	0.4	0.1	0.4	0.97	0.141193	0.41	-0.04	0.39
1061	3183544	P11940	PABP1	Polyadenylate-binding protein 1	636	70.6	9.5		0.91	0.974	0.989	1.011	0.879	1.036	0.931	0.972	0.952	0.98	0.992	0.985	1.013	1.042	1.02	1.018	0.992	1.006		0.958	0.975	0.952	0.986	1.025	1.005		0.95	0.410942	0.13	-0.07	0.87	0.97	0.0899257	0.58	-0.04	0.24	0.95	0.925345	0.02	-0.08	1.73
1062	12229875	Q13310	PABP4	Polyadenylate-binding protein 4	644	70.7	9.26		0.97	0.978	1.007	0.998	0.836	1.055	0.951	0.963	0.991	0.995	1.041	1.036	1.041	1.027	1.035	1.058	1.032	1.049		0.985	0.963	0.969	1.024	1.035	1.046		0.94	0.978882	0.01	-0.09	1.98	0.92	0.221959	0.27	-0.12	0.56	0.93	0.997604	0.01	-0.11	2.3
1063	46397025	Q9H074	PAIP1	Polyadenylate-binding protein-interacting protein 1	479	53.5	4.81		1.068	1.029	1.051	1.065	1.051	1.029	1.091	1.03	1.065	0.864	0.802	0.826	1.01	0.903	0.9	0.917	0.89	1.108		1.049	1.048	1.062	0.831	0.938	0.972		1.08	0.183556	0.33	0.11	0.49	1.08	0.180577	0.33	0.11	0.48	1.09	0.225627	0.27	0.13	0.57
1064	13431939	Q9Y6A5	TACC3	Transforming acidic coiled-coil-containing protein 3	838	90.3	5.05		0.82	0.939	0.974	1.087	0.589	1.131	0.954	1.05	1.028	0.94	0.982	0.963	1.007	1.172	1.121	1.091	0.915	1.257		0.911	0.936	1.011	0.962	1.1	1.088		0.84	0.332033	0.18	-0.26	0.74	0.86	0.112572	0.49	-0.22	0.31	0.93	0.110546	0.5	-0.11	0.3
1065	544328	Q06787	FMR1	Fragile X mental retardation protein 1	632	71.1	7.42		1.013	0.966	1.026	1.01	0.967	0.961	0.979	0.984	0.976	1.006	1.002	1.003	1.056	1.03	1.036	1.021	1.042	0.98		1.002	0.979	0.979	1.004	1.041	1.014		0.99	0.0732844	0.65	-0.02	0.19	0.97	0.282825	0.21	-0.05	0.67	0.97	0.429758	0.13	-0.05	0.88
1066	189047132	P51114	FXR1	Fragile X mental retardation syndrome-related protein 1	621	69.7	6.15		1.114	1.058	1.044	1.042	1.094	1.053	1.003	0.972	1.001	1.077	1.029	0.999	1.031	1.035	1.035	1.039	1.07	0.942		1.072	1.063	0.992	1.035	1.034	1.017		1.05	0.21944	0.28	0.08	0.55	1.05	0.182696	0.33	0.06	0.48	0.98	0.0924614	0.56	-0.04	0.25
1067	90177782	P51116	FXR2	Fragile X mental retardation syndrome-related protein 2	673	74.2	6.23		1.071	1.051	1.041	1.08	1.295	1.104	1.1	1.032	1.038	0.901	1.009	0.925	1.026	0.835	1.015	0.862	0.995	0.85		1.054	1.16	1.057	0.945	0.959	0.903		1.17	0.827893	0.03	0.22	1.48	1.29	0.811529	0.04	0.36	1.45	1.17	0.783113	0.04	0.23	1.4
1068	18266743	O15234	CASC3	Protein CASC3	703	76.2	6.48		0.926	1.013	0.979	1.058	0.825	1.068	0.946	0.896	0.951	0.948	1.007	1.04	1.005	1.09	0.978	1.109	1.092	1.142		0.973	0.984	0.931	0.998	1.024	1.115		0.87	0.990001	0.01	-0.2	2.08	0.88	0.332564	0.18	-0.18	0.75	0.84	0.999999	0	-0.26	2.89
1069	73921750	Q9H307	PININ	Pinin	717	81.6	7.14		1.056	1.06	0.948	1.048	1.062	1.04	1.119	1.066	1.05	1.027	1.012	0.966	1.001	0.96	0.998	1.001	1.038	0.952		1.022	1.05	1.079	1.001	0.986	0.997		1.02	0.0842023	0.61	0.04	0.22	1.05	0.484064	0.11	0.07	0.98	1.08	0.643976	0.07	0.11	1.19
1070	74754492	Q15287	RNPS1	RNA-binding protein with serine-rich domain 1	305	34.2	11.84		0.941	0.952	0.97	0.951	1.15	0.967	0.978	0.969	1.035	1.139	1.123	1.018	1.048	0.943	1.054	0.981	1.1	0.877		0.955	1.023	0.994	1.093	1.015	0.986		0.97	0.074431	0.65	-0.05	0.18	1.04	0.0678313	0.71	0.05	0.15	1.01	0.0514903	0.91	0.01	0.04
1071	259016156	Q13769	THOC5	THO complex subunit 5 homolog	683	78.5	6.87		1.116	1.078	0.982	1.04	0.915	0.966	1.077	1.076	1.017	1.109	0.995	0.979	1.024	1.031	0.919	1.03	1.001	0.824		1.059	0.974	1.057	1.028	0.991	0.952		1.11	0.266565	0.23	0.15	0.64	1.02	0.0594704	0.78	0.03	0.11	1.11	0.311768	0.19	0.15	0.72
1072	74759455	Q86W42	THOC6	THO complex subunit 6 homolog	341	37.5	7.43		0.956	1.028	0.977	1.092	0.937	0.984	0.957	0.926	1.049	0.974	0.991	0.91	0.924	0.894	0.911	0.93	1.029	0.935		0.987	1.004	0.977	0.958	0.909	0.965		1.02	0.0848668	0.6	0.03	0.22	1.04	0.102283	0.52	0.06	0.28	1.01	0.0564034	0.81	0.02	0.09
1073	83305833	Q8IYB3	SRRM1	Serine/arginine repetitive matrix protein 1	904	102.3	11.84		1.027	1.115	1.001	1.055	0.885	0.989	1.034	0.974	1.011	1.095	0.991	1.017	0.961	0.949	1.036	1.07	1.048	0.906		1.047	0.976	1.006	1.034	0.982	1.008		1.04	0.0927993	0.56	0.06	0.25	0.97	0.0715764	0.68	-0.05	0.17	1	0.0501446	0.98	0	0.01
1074	17380291	Q92900	RENT1	Regulator of nonsense transcripts 1	1129	124.3	6.61		0.955	0.995	1.025	1.01	0.904	1.024	0.96	0.972	1.002	0.966	1.013	0.973	1.015	1.002	1.007	1.003	0.991	0.996		0.992	0.979	0.978	0.984	1.008	0.997		0.99	0.0563063	0.81	-0.01	0.09	0.98	0.0740257	0.67	-0.03	0.18	0.98	0.282467	0.22	-0.03	0.67
1075	60390647	Q9HAU5	RENT2	Regulator of nonsense transcripts 2	1272	147.7	5.69		0.942	0.95	0.9	0.922	1.003	0.96	0.921	0.954	0.897	1.012	1.054	1.02	1.037	1.013	1.014	1.061	1.025	1.023		0.931	0.962	0.924	1.029	1.021	1.036		0.9	0.996387	0.01	-0.16	2.22	0.93	0.72778	0.05	-0.11	1.33	0.89	0.997389	0.01	-0.17	2.26
1076	6685628	O60942	MCE1	mRNA-capping enzyme	597	68.5	8.13		1.073	1.051	1.113	1.046	1.581	1.061	1.079	1.082	1.087	1.019	1.082	1.021	1.08	0.955	1.017	0.964	1.022	0.824		1.079	1.229	1.083	1.041	1.017	0.936		1.15	0.576973	0.08	0.2	1.09	1.31	0.318642	0.19	0.39	0.72	1.16	0.635774	0.07	0.21	1.17
1077	74735378	O43148	MCES	mRNA cap guanine-N7 methyltransferase	476	54.8	6.61		0.934	0.978	1.068	1.007	0.808	0.987	0.972	0.938	0.948	1.042	1.046	1.025	1.041	1.053	0.954	1.016	1.062	1.027		0.993	0.934	0.952	1.038	1.016	1.035		0.96	0.159829	0.37	-0.06	0.43	0.9	0.312028	0.19	-0.15	0.71	0.92	0.989714	0.01	-0.12	2.08
1078	46403176	Q86U42	PABP2	Polyadenylate-binding protein 2	306	32.7	5.06		1.083	1.135	1.063	1.042	0.824	1.136	1.117	1.064	1.054	1.006	0.858	0.891	0.932	0.869	0.959	0.931	0.925	0.93		1.094	1	1.079	0.919	0.92	0.929		1.18	0.999997	0	0.24	2.79	1.08	0.113869	0.48	0.11	0.32	1.16	0.999997	0	0.22	2.8
1079	74735411	O43809	CPSF5	Cleavage and polyadenylation specificity factor subunit 5	227	26.2	8.82		0.77	0.891	0.893	1.006	0.535	1.107	0.94	1.081	0.958	0.971	0.855	0.887	0.922	1.067	0.905	1.148	0.921	1.376		0.851	0.883	0.993	0.904	0.965	1.148		0.74	0.519329	0.1	-0.43	1.01	0.77	0.20828	0.29	-0.38	0.53	0.86	0.186179	0.33	-0.21	0.49
1080	88909266	Q16630	CPSF6	Cleavage and polyadenylation specificity factor subunit 6	551	59.2	7.15		1.036	0.987	0.977	1.059	0.949	1.024	1.005	0.987	0.985	0.995	1.038	0.993	1.013	1.001	0.978	0.983	1.018	0.951		1	1.01	0.992	1.009	0.997	0.984		1.02	0.0890207	0.57	0.02	0.24	1.03	0.101152	0.52	0.04	0.28	1.01	0.0665243	0.7	0.01	0.15
1081	74759932	Q8N684	CPSF7	Cleavage and polyadenylation specificity factor subunit 7	471	52	8		1.043	0.978	1.035	1.049	1.109	0.968	1.023	0.96	1.002	1.058	1.093	1.008	1.005	0.924	0.926	1.055	1.077	0.87		1.018	1.042	0.995	1.053	0.952	1.001		1.02	0.0565267	0.81	0.03	0.09	1.04	0.0802267	0.62	0.06	0.2	0.99	0.0508247	0.93	-0.01	0.03
1082	59803092	P51003	PAPOA	Poly(A) polymerase alpha	745	82.8	7.37		0.96	0.982	1.011	1.059	0.849	1.019	0.962	1.013	0.992	1.042	1.118	1.07	1.079	1.034	1.025	0.931	1.058	0.975		0.984	0.976	0.989	1.077	1.046	0.988		1	0.0510628	0.93	-0.01	0.03	0.99	0.0527764	0.88	-0.02	0.06	1	0.0500664	0.98	0	0.01
1083	13431366	Q92989	CLP1	Polyribonucleotide 5'-hydroxyl-kinase Clp1	425	47.6	6.62		1.071	1.021	0.926	1.004	1.276	0.883	0.95	0.923	0.946	0.952	0.933	0.92	0.894	0.871	0.907	0.892	0.995	0.842		1.006	1.054	0.939	0.935	0.891	0.91		1.11	0.30893	0.2	0.14	0.71	1.16	0.195411	0.31	0.21	0.51	1.03	0.0931854	0.55	0.05	0.26
1084	23503048	Q10570	CPSF1	Cleavage and polyadenylation specificity factor subunit 1	1443	160.8	6.4		1.001	1.002	0.987	0.946	1.079	0.943	0.982	0.933	0.915	0.942	0.96	0.942	0.99	0.909	0.942	1.004	1.02	0.858		0.996	0.99	0.943	0.948	0.947	0.961		1.04	0.0993447	0.53	0.05	0.28	1.03	0.0693127	0.69	0.04	0.16	0.98	0.061332	0.77	-0.03	0.11
1085	51338827	Q9P2I0	CPSF2	Cleavage and polyadenylation specificity factor subunit 2	782	88.4	5.11		1.018	0.998	0.986	1.005	1.083	0.946	1.111	0.99	1.022	1.042	1.024	1.029	0.972	0.98	0.969	0.939	1.077	0.952		1.001	1.011	1.041	1.032	0.974	0.989		1.01	0.0576041	0.8	0.02	0.09	1.02	0.0647614	0.73	0.03	0.14	1.05	0.140489	0.41	0.07	0.38
1086	18203503	Q9UKF6	CPSF3	Cleavage and polyadenylation specificity factor subunit 3	684	77.4	5.6		1.093	1.026	0.947	1.031	1.011	0.907	1.025	1.003	1.08	1.059	1.024	0.952	1.061	0.912	1.071	0.973	0.995	0.777		1.022	0.983	1.036	1.012	1.014	0.915		1.12	0.239174	0.26	0.16	0.59	1.07	0.129896	0.44	0.1	0.36	1.13	0.344269	0.17	0.18	0.76
1087	74749365	Q6UN15	FIP1	Pre-mRNA 3'-end-processing factor FIP1	594	66.5	5.59		1.131	1.062	1.071	1.043	1.106	0.975	1.014	1.025	0.972	1.04	0.99	1.014	0.983	0.95	0.948	0.921	1.004	0.87		1.088	1.041	1.004	1.014	0.96	0.931		1.17	0.888758	0.02	0.22	1.61	1.12	0.47092	0.11	0.16	0.95	1.08	0.367649	0.16	0.11	0.79
1088	209572695	Q9C0J8	WDR33	pre-mRNA 3' end processing protein WDR33	1336	145.8	9.17		0.915	0.925	0.953	1.03	0.886	1.005	1.038	0.995	0.987	0.986	1.013	0.935	1.01	0.848	1.034	1.024	1.094	0.853		0.931	0.974	1.007	0.978	0.964	0.99		0.94	0.121814	0.46	-0.09	0.34	0.98	0.0538479	0.85	-0.02	0.07	1.02	0.0557399	0.83	0.02	0.08
1089	74758580	Q6UXN9	WDR82	WD repeat-containing protein 82	313	35.1	7.69		0.843	0.961	1.052	1.042	0.812	1.064	0.854	1.097	1.014	0.998	0.99	0.965	0.978	1.053	0.962	1.051	0.976	1.061		0.952	0.973	0.988	0.984	0.998	1.029		0.93	0.197452	0.31	-0.11	0.51	0.95	0.0969088	0.54	-0.08	0.27	0.96	0.0811339	0.62	-0.06	0.21
1090	74752877	Q9NP77	SSU72	RNA polymerase II subunit A C-terminal domain phosphatase SSU72	194	22.6	5.33		1.073	0.944	0.954	0.939	0.95	1.029	0.999	0.967	0.96	0.941	0.961	0.992	0.885	1.016	0.965	0.945	0.978	1.267		0.99	0.973	0.975	0.964	0.955	1.063		0.93	0.0972194	0.54	-0.1	0.26	0.91	0.127992	0.44	-0.13	0.36	0.92	0.129213	0.44	-0.12	0.35
1091	461848	Q05048	CSTF1	Cleavage stimulation factor subunit 1	431	48.3	6.58		1.055	1.058	0.99	1.005	1.399	1.03	1.014	1.012	1.008	1.008	1.018	0.996	1.032	0.96	1.017	0.977	0.973	0.946		1.034	1.144	1.012	1.007	1.003	0.965		1.07	0.742221	0.04	0.1	1.35	1.19	0.263071	0.23	0.25	0.63	1.05	0.98755	0.01	0.07	2.04
1092	461847	P33240	CSTF2	Cleavage stimulation factor subunit 2	577	60.9	6.83		1.021	1.025	0.995	0.956	1.11	0.969	0.989	0.981	1.001	1.063	1.045	1.016	0.988	0.856	0.932	1.032	0.99	0.779		1.014	1.011	0.99	1.041	0.925	0.934		1.09	0.162037	0.37	0.12	0.44	1.08	0.125104	0.45	0.12	0.35	1.06	0.105005	0.51	0.08	0.29
1093	71153234	Q9H0L4	CSTFT	Cleavage stimulation factor subunit 2 tau variant	616	64.4	7.25		1.003	1.065	1.026	0.949	1.088	0.908	0.971	0.937	0.926	1.003	1.055	1.054	1.106	1.017	1.07	1.014	1.076	0.909		1.031	0.981	0.945	1.038	1.065	1		1.03	0.0882907	0.57	0.05	0.24	0.98	0.0572163	0.82	-0.03	0.09	0.95	0.178733	0.34	-0.08	0.47
1094	71153231	Q12996	CSTF3	Cleavage stimulation factor subunit 3	717	82.9	8.12		1.135	1.048	0.957	0.997	0.983	1.026	0.982	1.027	1.024	0.98	1.009	0.897	0.971	0.889	0.958	0.954	1.036	0.925		1.046	1.002	1.011	0.962	0.939	0.972		1.08	0.209221	0.29	0.11	0.54	1.03	0.12715	0.44	0.04	0.36	1.04	0.175869	0.34	0.06	0.47
1095	71153180	Q92797	SYMPK	Symplekin	1274	141.1	6.13		1.065	0.995	1.038	1.053	0.952	1.026	1.02	1.07	1.029	0.989	1.023	1.095	1.08	1.046	1.03	0.981	0.971	0.999		1.033	1.01	1.04	1.036	1.052	0.984		1.05	0.544172	0.09	0.07	1.05	1.03	0.124894	0.45	0.04	0.35	1.06	0.832098	0.03	0.08	1.49
1096	44887869	Q96EP5	DAZP1	DAZ-associated protein 1	407	43.4	8.56		1.032	1.048	0.972	0.959	1.025	0.945	1.009	1.024	0.972	1.075	1.044	1.006	1.021	1.057	1.086	1.061	1.045	1.198		1.018	0.976	1.002	1.042	1.055	1.101		0.92	0.306848	0.19	-0.11	0.71	0.89	0.566714	0.08	-0.17	1.08	0.91	0.442468	0.12	-0.14	0.92
1097	50402099	P62495	ERF1	Eukaryotic peptide chain release factor subunit 1	437	49	5.71		0.957	1.054	1.03	1.008	1.064	1.04	1.03	1.051	1.079	0.909	0.963	0.943	0.946	1.127	0.983	0.963	0.942	1.235		1.014	1.037	1.053	0.938	1.018	1.047		0.97	0.0619392	0.76	-0.05	0.12	0.99	0.0511626	0.93	-0.01	0.03	1.01	0.0504213	0.95	0.01	0.02
1098	121688	P15170	ERF3A	Eukaryotic peptide chain release factor GTP-binding subunit ERF3A	499	55.7	5.62		0.985	0.961	0.996	1.02	0.903	1.04	0.949	1.002	1.017	0.999	1.028	1.049	1.061	1.024	1.058	1.008	0.994	0.973		0.98	0.988	0.989	1.025	1.048	0.992		0.99	0.124256	0.48	-0.02	0.32	1	0.050884	0.93	-0.01	0.03	1	0.051814	0.92	0	0.04
1099	322510104	Q96Q15	SMG1	Serine/threonine-protein kinase SMG1	3661	410.2	6.46		1.118	0.911	1.039	0.983	1.026	0.907	1.05	0.896	1.015	1.009	0.983	1.098	0.971	1.007	0.923	0.977	0.945	0.878		1.023	0.972	0.987	1.03	0.967	0.933		1.1	0.246158	0.25	0.13	0.6	1.04	0.130059	0.44	0.06	0.36	1.06	0.154907	0.38	0.08	0.42
1100	91771922	Q86US8	EST1A	Telomerase-binding protein EST1A	1419	160.4	7.05		1.352	1.059	0.944	0.977	0.98	1.084	1.092	0.974	1.097	1.083	1.108	1.004	1.05	1.022	1.079	0.984	1.021	1.004		1.119	1.014	1.054	1.065	1.051	1.003		1.12	0.14839	0.4	0.16	0.4	1.01	0.059566	0.79	0.02	0.1	1.05	0.213739	0.28	0.07	0.55
1101	68566500	Q9Y450	HBS1L	HBS1-like protein	684	75.4	6.61		1.1	0.944	0.978	1.018	0.823	0.971	0.933	1.051	1.003	0.994	0.938	1.026	1.016	1.242	1.046	1.101	0.857	1.467		1.007	0.937	0.996	0.986	1.101	1.142		0.88	0.108541	0.5	-0.18	0.3	0.82	0.181236	0.33	-0.28	0.48	0.87	0.120857	0.46	-0.2	0.33
1102	322510057	Q9BRX2	PELO	Protein pelota homolog	385	43.3	6.34		1.059	1.02	1.013	0.988	1.002	1.024	0.947	1.016	0.949	0.975	1.051	1.068	1.107	1.069	1.073	0.983	1.014	1.011		1.031	1.005	0.971	1.031	1.083	1.002		1.03	0.347633	0.18	0.04	0.75	1	0.0546342	0.88	0	0.06	0.97	0.221069	0.27	-0.05	0.57
1103	55977123	P68400	CSK21	Casein kinase II subunit alpha	391	45.1	7.74		0.955	0.944	0.992	1.008	0.878	0.98	0.998	0.966	0.958	0.999	0.966	0.964	0.972	1.048	0.975	1.025	0.977	1.067		0.964	0.955	0.974	0.976	0.998	1.023		0.94	0.45601	0.12	-0.09	0.92	0.93	0.274073	0.23	-0.1	0.65	0.95	0.360213	0.17	-0.07	0.78
1104	62900709	Q9H6R4	NOL6	Nucleolar protein 6	1146	127.5	7.64		0.924	0.938	0.986	0.964	0.959	1.021	0.94	1.017	0.958	1.033	0.986	0.98	0.969	0.96	1.02	1.078	1.048	1.035		0.949	0.981	0.972	1	0.983	1.053		0.9	0.982467	0.01	-0.15	1.99	0.93	0.794762	0.04	-0.1	1.41	0.92	0.79622	0.04	-0.12	1.43
1105	66774227	Q9Y3A4	RRP7A	Ribosomal RNA-processing protein 7 homolog A	280	32.3	9.58		0.865	0.929	0.931	1.022	0.599	0.958	1.009	0.863	0.936	1.127	1.14	1.035	1.097	1.086	1.134	1.27	1.17	1.329		0.908	0.86	0.936	1.1	1.106	1.256		0.72	0.999947	0	-0.47	2.61	0.68	0.739132	0.05	-0.55	1.33	0.74	0.994308	0.01	-0.42	2.16
1106	158518532	Q15061	WDR43	WD repeat-containing protein 43	677	74.8	5.57		1.15	1.116	1.056	0.95	1.192	0.962	1.037	1.002	0.987	1.027	0.944	0.887	0.96	0.929	0.931	0.972	0.962	0.998		1.108	1.035	1.008	0.953	0.94	0.977		1.13	0.976675	0.01	0.18	1.94	1.06	0.107589	0.51	0.08	0.29	1.03	0.356579	0.16	0.05	0.78
1107	41016916	Q969X6	CIR1A	Cirhin	686	76.8	8.85		1.042	1.09	0.917	0.923	1.078	0.928	0.984	0.926	0.947	1.042	1.072	1.021	1.021	0.922	1.006	0.938	1.083	0.817		1.016	0.976	0.952	1.045	0.983	0.946		1.07	0.111855	0.49	0.1	0.31	1.03	0.0613237	0.76	0.05	0.12	1.01	0.0506187	0.94	0.01	0.03
1108	296452998	Q8TED0	UTP15	U3 small nucleolar RNA-associated protein 15 homolog	518	58.4	9.11		0.983	1.082	1.029	1.027	0.847	0.992	1.055	1.022	1.019	1.001	0.984	0.946	0.985	0.981	0.905	1.049	0.966	1.158		1.031	0.955	1.032	0.977	0.957	1.058		0.98	0.0699922	0.7	-0.04	0.16	0.9	0.238318	0.26	-0.15	0.59	0.98	0.0724941	0.68	-0.03	0.17
1109	71153494	Q9H583	HEAT1	HEAT repeat-containing protein 1	2144	242.2	6.54		0.921	1.059	1.004	1.081	1.041	1.004	1.018	1.075	0.977	0.935	0.904	0.946	0.942	0.961	0.95	1.026	0.965	0.981		0.995	1.042	1.024	0.928	0.951	0.991		1	0.0508779	0.93	0.01	0.03	1.05	0.383035	0.15	0.07	0.83	1.03	0.153805	0.39	0.05	0.41
1110	73622083	Q8IWA0	WDR75	WD repeat-containing protein 75	830	94.4	5.96		0.984	1	1.083	0.983	0.917	1.001	1.067	1.025	1.069	0.948	0.954	0.911	0.914	0.922	0.907	0.991	0.951	0.964		1.022	0.967	1.054	0.938	0.914	0.969		1.06	0.329252	0.18	0.08	0.75	1	0.050539	0.94	0	0.03	1.09	0.982269	0.01	0.12	1.98
1111	73920973	Q9Y5J1	UTP18	U3 small nucleolar RNA-associated protein 18 homolog	556	62	8.76		1.229	1.188	1.083	1.101	0.997	1.128	1.214	1.045	1.098	0.971	0.964	0.965	0.949	0.914	0.936	0.932	0.947	0.892		1.167	1.075	1.119	0.967	0.933	0.924		1.26	0.995746	0.01	0.34	2.2	1.16	0.885715	0.02	0.22	1.62	1.21	0.916918	0.02	0.28	1.69
1112	46577504	Q8NI36	WDR36	WD repeat-containing protein 36	951	105.3	7.53		0.977	1.014	1.034	1.012	0.889	0.939	1.007	1.002	1.004	1.042	0.984	0.994	1.001	0.93	0.938	1.022	1.057	0.998		1.008	0.947	1.004	1.007	0.956	1.026		0.98	0.111257	0.51	-0.02	0.29	0.92	0.460688	0.12	-0.12	0.93	0.98	0.228213	0.29	-0.03	0.54
1113	223634675	Q12788	TBL3	Transducin beta-like protein 3	808	89	6.9		0.999	1.042	0.97	1.051	0.943	1.048	1.02	1.025	1.029	1.052	1.006	0.985	0.988	0.965	0.99	0.993	0.986	1.071		1.003	1.014	1.025	1.014	0.981	1.016		0.99	0.0653383	0.73	-0.02	0.14	1	0.0502128	0.96	0	0.02	1.01	0.0615661	0.77	0.01	0.11
1114	12230773	Q9UNX4	WDR3	WD repeat-containing protein 3	943	106	6.64		0.916	1.03	1.044	1.005	0.745	1.01	1.001	1.076	1.022	0.96	0.926	0.922	0.909	1.033	0.929	1.014	0.983	1.111		0.997	0.92	1.033	0.936	0.957	1.036		0.96	0.102499	0.52	-0.06	0.28	0.89	0.210248	0.29	-0.17	0.53	1	0.050483	0.95	0	0.02
1115	134047946	Q9NYH9	UTP6	U3 small nucleolar RNA-associated protein 6 homolog	597	70.1	7.28		0.967	1.047	1.03	1.015	0.866	1.045	0.934	1.027	0.946	1.119	1.031	1.128	1.011	1.115	0.987	1.049	1.07	1.024		1.014	0.975	0.969	1.093	1.038	1.048		0.97	0.213718	0.3	-0.05	0.53	0.93	0.228972	0.27	-0.1	0.57	0.92	0.623367	0.07	-0.11	1.16
1116	116242740	Q15269	PWP2	Periodic tryptophan protein 2 homolog	919	102.4	6.15		1.012	1.023	0.987	0.96	0.992	1.008	1.003	1.037	1.004	0.956	0.866	0.939	0.911	1.071	0.871	1.102	0.913	1.102		1.007	0.987	1.015	0.92	0.951	1.039		0.97	0.0769388	0.65	-0.04	0.19	0.95	0.120286	0.46	-0.07	0.33	0.98	0.0650616	0.72	-0.03	0.14
1117	7387887	O00566	MPP10	U3 small nucleolar ribonucleoprotein protein MPP10	681	78.8	4.86		1.029	1.028	1.005	1.023	0.887	0.962	1.019	1.007	0.974	1.012	0.975	0.962	0.966	0.904	0.965	0.974	1.016	0.91		1.021	0.958	1	0.983	0.945	0.967		1.06	0.357688	0.16	0.08	0.79	0.99	0.0534605	0.86	-0.01	0.06	1.03	0.154741	0.37	0.05	0.43
1118	52783099	Q9NV31	IMP3	U3 small nucleolar ribonucleoprotein protein IMP3	184	21.8	9.5		1.139	1.144	0.989	1.093	1.337	0.973	1.116	1.046	1.072	1.096	0.964	0.873	0.984	0.897	0.971	1.02	1.047	0.865		1.091	1.134	1.078	0.978	0.951	0.977		1.12	0.292162	0.21	0.16	0.68	1.16	0.232633	0.26	0.21	0.58	1.1	0.350165	0.17	0.14	0.77
1119	73621060	Q96G21	IMP4	U3 small nucleolar ribonucleoprotein protein IMP4	291	33.7	9.47		1.05	1.024	1.059	1.007	0.812	1.003	1.025	1.054	1.05	1.031	1.045	0.899	0.986	0.991	0.984	0.999	0.949	1.007		1.044	0.941	1.043	0.991	0.987	0.985		1.06	0.732731	0.05	0.08	1.33	0.96	0.0967352	0.54	-0.07	0.26	1.06	0.745112	0.05	0.08	1.33
1120	302393806	Q13428	TCOF	Treacle protein	1488	152	9.04		1.065	1.016	1.012	1.004	1.08	0.991	1.067	1.017	1.025	1.063	0.994	0.978	0.989	0.928	0.952	0.991	1.02	0.917		1.031	1.025	1.036	1.012	0.957	0.976		1.06	0.314713	0.19	0.08	0.71	1.05	0.202873	0.3	0.07	0.52	1.06	0.373955	0.16	0.09	0.8
1121	14549159	P22087	FBRL	rRNA 2'-O-methyltransferase fibrillarin	321	33.8	10.18		1.042	1.053	0.997	1.032	0.901	1.009	1.073	1.063	1.037	1.036	0.989	1.001	0.98	0.945	0.988	1.023	1.027	0.959		1.031	0.981	1.058	1.009	0.971	1.003		1.03	0.159526	0.38	0.04	0.42	0.98	0.074549	0.65	-0.03	0.18	1.05	0.549048	0.09	0.08	1.05
1122	117949609	O00567	NOP56	Nucleolar protein 56	594	66	9.19		1.025	1.069	0.985	1.024	0.97	1.009	1.057	1.059	1.048	1.063	1.014	1.002	1.027	0.964	1.022	0.999	1.016	0.996		1.026	1.001	1.054	1.026	1.005	1.004		1.02	0.133754	0.43	0.03	0.37	1	0.0532234	0.87	0	0.06	1.05	0.999978	0	0.07	2.65
1123	17380155	Q9Y2X3	NOP58	Nucleolar protein 58	529	59.5	8.92		1.017	1.012	1.012	1.062	1.011	0.997	1.055	1.002	1.015	0.953	0.93	0.916	0.955	1.032	0.931	1.014	0.974	1.111		1.014	1.023	1.024	0.933	0.973	1.033		0.98	0.0733747	0.66	-0.03	0.18	0.99	0.0552201	0.84	-0.01	0.07	0.99	0.054528	0.85	-0.01	0.07
1124	3913488	O60832	DKC1	H/ACA ribonucleoprotein complex subunit 4	514	57.6	9.42		1.03	1.005	0.99	1.043	0.97	0.967	1.024	1.007	1.024	1.011	0.97	1.021	0.994	1.012	1.005	1.044	1.043	1.008		1.008	0.993	1.018	1.001	1.004	1.032		0.98	0.275939	0.23	-0.03	0.65	0.96	0.267759	0.24	-0.05	0.63	0.99	0.173911	0.36	-0.02	0.44
1125	68565945	Q9NX24	NHP2	H/ACA ribonucleoprotein complex subunit 2	153	17.2	8.22		1	1.036	1.025	1.104	1.139	1.037	1.17	0.946	1.115	0.906	1.026	0.893	0.97	0.929	1.019	0.934	1.024	0.988		1.02	1.093	1.077	0.942	0.973	0.982		1.04	0.246806	0.25	0.06	0.6	1.11	0.726585	0.05	0.16	1.31	1.1	0.237812	0.26	0.13	0.58
1126	51828015	Q9NY12	GAR1	H/ACA ribonucleoprotein complex subunit 1	217	22.3	10.92		0.982	0.998	1.002	0.947	1.076	0.921	0.985	1.008	1.01	0.986	1.034	0.909	0.909	0.837	0.929	0.89	0.936	0.783		0.994	0.981	1.001	0.976	0.892	0.87		1.14	0.702593	0.05	0.19	1.28	1.13	0.352537	0.17	0.17	0.78	1.15	0.741657	0.05	0.2	1.34
1127	54036209	Q9NPE3	NOP10	H/ACA ribonucleoprotein complex subunit 3	64	7.7	9.99		1.197	1.083	1.064	0.991	1.248	0.949	1.062	0.943	1.032	1.05	1.055	1.027	1.116	0.783	1.021	0.907	0.967	0.666		1.115	1.063	1.012	1.044	0.973	0.847		1.32	0.685582	0.06	0.4	1.24	1.25	0.340684	0.18	0.33	0.76	1.2	0.348968	0.17	0.26	0.77
1128	34582346	Q9Y324	FCF1	rRNA-processing protein FCF1 homolog	198	23.4	9.7		1.046	1.138	0.927	1.022	0.667	1.12	1.216	1.067	0.941	1.008	1.009	0.996	0.972	0.829	0.971	0.96	1.009	0.908		1.037	0.936	1.075	1.005	0.924	0.959		1.08	0.194672	0.31	0.11	0.5	0.98	0.0528511	0.88	-0.03	0.06	1.12	0.253924	0.24	0.16	0.61
1129	68566226	Q9BVJ6	UT14A	U3 small nucleolar RNA-associated protein 14 homolog A	771	87.9	7.87		1.098	1.094	1.05	1.017	0.943	0.993	1.044	0.981	0.949	1.064	1.055	1.017	1.038	0.957	1.004	0.998	1.042	0.975		1.08	0.984	0.992	1.045	0.999	1.005		1.08	0.783902	0.04	0.1	1.41	0.98	0.105326	0.52	-0.03	0.28	0.99	0.0655293	0.72	-0.02	0.14
1130	20532172	Q92979	NEP1	Ribosomal RNA small subunit methyltransferase NEP1	244	26.7	9.17		0.953	0.983	0.991	0.997	0.906	1.022	1.038	0.989	0.986	1.015	0.919	0.968	0.972	0.977	0.953	1.019	0.998	1.026		0.975	0.975	1.004	0.968	0.968	1.014		0.96	0.707203	0.05	-0.06	1.27	0.96	0.176126	0.34	-0.06	0.47	0.99	0.0802884	0.62	-0.01	0.21
1131	27151474	Q14692	BMS1	Ribosome biogenesis protein BMS1 homolog	1282	145.7	6.44		0.949	0.96	0.963	0.89	0.974	0.965	0.911	1.053	0.938	0.983	0.956	0.929	0.931	0.954	0.971	1.011	0.984	0.945		0.957	0.943	0.967	0.956	0.952	0.98		0.98	0.199619	0.32	-0.03	0.5	0.96	0.188579	0.32	-0.06	0.49	0.99	0.0579789	0.8	-0.02	0.1
1132	313104140	Q9H0A0	NAT10	N-acetyltransferase 10	1025	115.7	8.27		0.972	1.001	0.945	1.009	0.857	1.007	1.035	0.997	0.986	0.99	0.992	0.957	0.982	0.942	1.008	1.045	0.956	1.004		0.973	0.958	1.006	0.98	0.977	1.002		0.97	0.149063	0.4	-0.04	0.4	0.96	0.115598	0.48	-0.06	0.32	1	0.0519344	0.89	0.01	0.05
1133	90103518	Q9Y2P8	RCL1	RNA 3'-terminal phosphate cyclase-like protein	373	40.8	9.26		0.958	0.926	0.999	1.022	0.696	0.971	1.062	1.144	0.992	0.969	0.957	0.967	1.021	1.044	0.998	1.086	1.018	1.243		0.961	0.896	1.066	0.964	1.021	1.116		0.86	0.539631	0.09	-0.21	1.04	0.8	0.397738	0.14	-0.32	0.84	0.96	0.0923171	0.57	-0.07	0.24
1134	116242694	Q9Y3B8	ORN	Oligoribonuclease, mitochondrial	237	26.8	6.87		0.984	0.969	1.036	1.032	0.926	1.008	0.927	0.987	1.014	0.945	0.958	1.026	1.032	1.065	1.146	1.045	0.916	0.845		0.996	0.988	0.976	0.976	1.081	0.935		1.07	0.155425	0.38	0.09	0.42	1.06	0.118268	0.47	0.08	0.33	1.04	0.0943461	0.56	0.06	0.25
1135	74714582	Q8IZH2	XRN1	5'-3' exoribonuclease 1	1706	194	7.21		1.055	1.006	1.003	1.014	1.092	1.093	1.009	1.021	1.011	1.172	1.211	1.052	1.139	1.114	1.038	1.163	1.108	1.155		1.021	1.066	1.014	1.145	1.097	1.142		0.89	0.993264	0.01	-0.16	2.13	0.93	0.612345	0.07	-0.1	1.13	0.89	0.99999	0	-0.17	2.72
1136	17368711	Q9BZE4	NOG1	Nucleolar GTP-binding protein 1	634	73.9	9.5		1.045	1.055	0.954	0.989	0.897	1.019	1.007	0.989	0.93	1.021	0.995	0.941	1.005	1.015	1.018	1.093	0.989	1.053		1.018	0.968	0.975	0.986	1.013	1.045		0.97	0.0902865	0.58	-0.04	0.23	0.93	0.33107	0.18	-0.11	0.74	0.93	0.403971	0.14	-0.1	0.84
1137	3334276	Q13823	NOG2	Nucleolar GTP-binding protein 2	731	83.6	9.25		1.129	1.179	1.237	1.139	0.993	1.11	1.027	0.966	0.948	0.985	0.987	0.944	1.007	0.971	1.038	1.026	0.999	0.948		1.182	1.081	0.98	0.972	1.005	0.991		1.19	0.991683	0.01	0.25	2.11	1.09	0.390684	0.15	0.13	0.83	0.99	0.0618235	0.76	-0.02	0.12
1138	229462872	Q9BVP2	GNL3	Guanine nucleotide-binding protein-like 3	549	62	9.16		1.006	1.096	0.997	1.024	1.033	0.987	1.061	1.009	1.033	0.998	0.933	0.96	1.013	0.991	1.014	1.02	1.003	1.103		1.033	1.015	1.034	0.964	1.006	1.042		0.99	0.0544243	0.84	-0.01	0.08	0.97	0.118516	0.46	-0.04	0.33	0.99	0.0557888	0.82	-0.01	0.08
1139	74752999	Q9NVN8	GNL3L	Guanine nucleotide-binding protein-like 3-like protein	582	65.5	8.44		0.91	1.032	1.067	0.897	1.039	1.073	1.076	1.065	0.939	1.073	0.942	1.018	1.089	0.986	1.049	1.005	1.063	0.982		1.003	1.003	1.026	1.011	1.042	1.017		0.99	0.0573571	0.81	-0.02	0.09	0.99	0.0560017	0.83	-0.02	0.08	1.01	0.0534389	0.86	0.01	0.07
1140	24212017	Q9NU22	MDN1	Midasin	5596	632.4	5.68		0.883	0.933	0.939	0.866	0.862	0.885	0.884	0.994	0.899	1.026	0.998	1.027	0.967	0.989	0.969	1.043	0.983	1.058		0.918	0.871	0.926	1.017	0.975	1.028		0.89	0.92707	0.02	-0.16	1.71	0.85	0.999884	0	-0.24	2.54	0.9	0.624698	0.07	-0.15	1.16
1141	55976611	Q9NW13	RBM28	RNA-binding protein 28	759	85.7	9.22		1.15	1.097	1.074	1.038	0.83	1.072	1.188	1.093	1.079	0.997	0.994	0.965	0.949	0.938	0.968	0.977	0.978	0.969		1.107	0.98	1.12	0.985	0.952	0.975		1.14	0.999049	0	0.18	2.38	1.01	0.0504649	0.95	0.01	0.02	1.15	0.964682	0.01	0.2	1.88
1142	74753398	Q9ULX3	NOB1	RNA-binding protein NOB1	412	46.6	7.18		1.001	0.95	0.936	0.969	1.04	0.895	0.891	0.958	0.873	0.913	0.984	0.998	0.949	0.984	0.933	0.964	1.018	1.013		0.963	0.968	0.907	0.965	0.955	0.998		0.96	0.243877	0.25	-0.05	0.61	0.97	0.0973945	0.54	-0.04	0.27	0.91	0.764067	0.04	-0.14	1.37
1143	3122258	P56537	IF6	Eukaryotic translation initiation factor 6	245	26.6	4.68		1.047	1.004	0.984	0.977	1.106	0.939	0.996	0.971	1.019	1.102	1.146	1.054	1.092	1.02	1.077	0.951	1.115	0.88		1.012	1.007	0.995	1.101	1.063	0.982		1.03	0.0685899	0.7	0.04	0.16	1.03	0.0590289	0.78	0.04	0.11	1.01	0.0535806	0.86	0.02	0.07
1144	28380824	Q9Y3A5	SBDS	Ribosome maturation protein SBDS	250	28.7	8.75		0.937	0.953	1.035	1.08	0.781	1.081	0.949	1.043	1.073	0.919	0.947	0.994	1.044	1.142	1.024	1.023	0.985	1.099		0.975	0.981	1.022	0.953	1.07	1.036		0.94	0.247797	0.25	-0.09	0.6	0.95	0.079313	0.63	-0.08	0.2	0.99	0.0583146	0.8	-0.02	0.1
1145	166232397	Q7Z2Z2	ETUD1	Elongation factor Tu GTP-binding domain-containing protein 1	1120	125.3	5.91		0.94	1.105	1.002	0.934	1.013	0.992	1.035	1.027	0.912	1.062	1.023	0.991	1.033	1.074	0.982	0.972	1.033	1.131		1.015	0.98	0.991	1.025	1.03	1.045		0.97	0.0716407	0.68	-0.04	0.17	0.94	0.220176	0.28	-0.09	0.56	0.95	0.135011	0.43	-0.08	0.37
1146	172045910	Q9H089	LSG1	Large subunit GTPase 1 homolog	658	75.2	6.38		0.948	0.985	0.954	0.956	0.811	0.914	0.955	0.968	0.949	1.052	1.016	1.045	0.975	0.889	0.87	0.902	0.925	0.953		0.962	0.894	0.957	1.038	0.911	0.927		1.04	0.418152	0.13	0.05	0.9	0.96	0.106792	0.51	-0.05	0.29	1.03	0.427899	0.12	0.05	0.91
1147	308153554	Q8NB90	SPAT5	Spermatogenesis-associated protein 5	893	97.8	5.66		0.998	1.08	0.971	0.902	1.29	0.984	1.073	1.023	0.909	1.068	0.972	1.011	0.935	1.009	1.013	0.879	0.987	0.968		1.017	1.059	1.002	1.017	0.985	0.945		1.08	0.306221	0.2	0.11	0.7	1.12	0.143845	0.41	0.16	0.39	1.06	0.15201	0.39	0.08	0.41
1148	6831735	Q9Y3D8	KAD6	Adenylate kinase isoenzyme 6	172	20	4.58		0.915	0.915	0.991	0.966	0.847	1.046	0.965	0.992	1.006	0.951	0.992	1.063	1.051	1.089	1.046	1.077	1.064	1.009		0.941	0.953	0.988	1.002	1.062	1.05		0.9	0.854592	0.03	-0.16	1.54	0.91	0.318131	0.19	-0.14	0.72	0.94	0.660724	0.06	-0.09	1.23
1149	38372882	Q15070	OXA1L	Mitochondrial inner membrane protein OXA1L	435	48.5	9.45		1.026	1.037	0.97	0.998	0.821	0.974	1.065	0.991	0.99	0.955	0.896	1.006	0.911	0.869	0.922	1.062	0.908	0.944		1.011	0.931	1.016	0.952	0.901	0.971		1.04	0.116805	0.48	0.06	0.32	0.96	0.0828666	0.61	-0.06	0.22	1.05	0.129018	0.45	0.06	0.35
1150	46577650	P61011	SRP54	Signal recognition particle 54 kDa protein	504	55.7	8.75		0.956	1.01	0.998	0.996	1.032	0.985	0.956	0.987	0.982	1.011	1.022	1.017	0.976	1.037	1.031	1.027	0.996	1.025		0.988	1.005	0.975	1.017	1.015	1.016		0.97	0.280485	0.22	-0.04	0.65	0.99	0.0932285	0.54	-0.02	0.27	0.96	0.770702	0.04	-0.06	1.39
1151	48429109	P61619	S61A1	Protein transport protein Sec61 subunit alpha isoform 1	476	52.2	8.06		0.933	0.972	0.964	1.037	0.767	1.054	1.007	1.083	1.043	0.993	0.936	0.982	0.964	1.088	0.983	1.094	0.999	1.113		0.957	0.953	1.044	0.97	1.012	1.069		0.9	0.784973	0.04	-0.16	1.4	0.89	0.198264	0.31	-0.17	0.51	0.98	0.0890216	0.59	-0.03	0.23
1152	38503386	P60059	SC61G	Protein transport protein Sec61 subunit gamma	68	7.7	9.99		0.984	1.171	0.998	0.988	1.075	1.044	1.069	1.115	1.088	1.13	1.083	1.134	1.057	0.97	1.085	1.088	1.03	0.911		1.051	1.036	1.091	1.116	1.037	1.01		1.04	0.0785305	0.63	0.06	0.2	1.03	0.0715624	0.68	0.04	0.17	1.08	0.295121	0.21	0.11	0.68
1153	74732781	Q99442	SEC62	Translocation protein SEC62	399	45.8	7.12		1.016	1.035	0.958	1.043	0.657	1.059	1.084	0.982	0.976	1.016	1.048	0.935	1.005	0.915	0.985	1.001	1.021	0.972		1.003	0.92	1.014	1	0.968	0.998		1.01	0.0536101	0.86	0.01	0.06	0.92	0.0874941	0.59	-0.12	0.23	1.02	0.0691819	0.69	0.02	0.16
1154	18203500	Q9UGP8	SEC63	Translocation protein SEC63 homolog	760	87.9	5.31		0.942	0.892	0.9	0.898	0.999	0.937	0.929	0.965	0.966	1.049	1.019	0.996	0.94	1.009	0.961	1.04	0.995	1.163		0.911	0.945	0.953	1.022	0.97	1.066		0.86	0.769607	0.04	-0.23	1.37	0.89	0.490825	0.11	-0.17	0.97	0.89	0.528933	0.1	-0.16	1.02
1155	14916999	P11021	GRP78	78 kDa glucose-regulated protein	654	72.3	5.16		1.03	1.017	0.981	0.981	0.992	0.975	1.084	1.04	1.031	1.028	0.989	0.979	0.977	0.939	0.973	0.992	1.011	0.927		1.009	0.982	1.052	0.999	0.963	0.977		1.03	0.179431	0.33	0.05	0.48	1.01	0.0539713	0.83	0.01	0.08	1.08	0.629256	0.07	0.11	1.17
1156	1351111	P49458	SRP09	Signal recognition particle 9 kDa protein	86	10.1	7.97		0.946	1.037	0.981	1.006	0.675	0.992	0.988	1.02	1.018	1.069	1.016	1.032	1.046	1.04	1.016	1.024	1.047	1.009		0.988	0.891	1.009	1.039	1.034	1.027		0.96	0.250448	0.25	-0.06	0.6	0.87	0.220607	0.28	-0.2	0.55	0.98	0.203952	0.3	-0.03	0.52
1157	116242801	P37108	SRP14	Signal recognition particle 14 kDa protein	136	14.6	10.04		0.962	0.993	0.999	1.008	0.787	0.984	1.028	1.021	1.055	0.977	0.967	0.983	0.996	1.004	0.987	0.971	0.975	1.062		0.985	0.926	1.035	0.975	0.996	1.003		0.98	0.0844183	0.6	-0.03	0.22	0.92	0.16156	0.37	-0.12	0.43	1.03	0.162682	0.37	0.04	0.43
1158	6094347	O76094	SRP72	Signal recognition particle subunit SRP72	671	74.6	9.26		0.911	0.961	1.007	1.045	0.805	1.041	0.931	1.01	0.988	0.97	1.007	1.001	0.953	0.961	0.981	0.953	0.997	1.013		0.959	0.963	0.976	0.993	0.965	0.988		0.97	0.133726	0.44	-0.04	0.35	0.98	0.060096	0.78	-0.04	0.11	0.99	0.067612	0.72	-0.02	0.14
1159	37154869	Q9UHB9	SRP68	Signal recognition particle subunit SRP68	627	70.7	8.56		0.935	0.983	0.979	1.039	0.871	1.057	0.991	1.022	1.029	0.997	0.964	1.011	1.079	1.009	1.053	1.006	0.967	1.084		0.966	0.989	1.014	0.991	1.047	1.019		0.95	0.264707	0.23	-0.08	0.63	0.97	0.07057	0.69	-0.04	0.16	1	0.0520201	0.9	-0.01	0.04
1160	115502457	P09132	SRP19	Signal recognition particle 19 kDa protein	144	16.1	9.85		1.182	1.024	1.109	1.013	1.337	0.977	1.093	0.939	1.03	0.992	1.058	0.984	1.024	0.936	0.997	0.919	0.991	0.829		1.105	1.109	1.02	1.011	0.986	0.913		1.21	0.765691	0.04	0.28	1.37	1.21	0.320126	0.19	0.28	0.72	1.12	0.342325	0.17	0.16	0.76
1161	20455516	P08240	SRPR	Signal recognition particle receptor subunit alpha	638	69.8	8.95		0.993	1.001	1.027	1.01	0.804	0.968	1.048	1.014	1.018	1.055	0.998	0.974	1.014	0.975	1.028	1.053	0.987	1.06		1.007	0.927	1.027	1.009	1.006	1.034		0.97	0.172841	0.35	-0.04	0.45	0.9	0.324081	0.19	-0.16	0.73	0.99	0.05798	0.79	-0.01	0.1
1162	31340540	Q9Y5M8	SRPRB	Signal recognition particle receptor subunit beta	271	29.7	9.04		1.069	1.078	1.012	1.111	0.826	1.042	1.06	1.115	1.065	1.004	0.952	0.984	0.947	0.983	0.927	1.003	1.043	1.054		1.053	0.993	1.08	0.98	0.952	1.034		1.02	0.108516	0.49	0.03	0.31	0.96	0.0737062	0.67	-0.06	0.18	1.05	0.449979	0.12	0.06	0.92
1163	557952606	Q9Y6A9	SPCS1	Signal peptidase complex subunit 1	102	11.8	9.31		0.858	1.076	0.962	1.053	0.615	1.187	1.143	1.186	1.035	0.941	0.835	0.942	0.889	1.029	0.917	1.081	0.938	1.218		0.965	0.952	1.121	0.906	0.945	1.079		0.89	0.184836	0.33	-0.16	0.48	0.88	0.0978624	0.54	-0.18	0.27	1.04	0.0721251	0.67	0.06	0.17
1164	6648110	Q15005	SPCS2	Signal peptidase complex subunit 2	226	25	8.47		0.905	0.985	0.998	1.018	0.778	1.007	0.95	1.012	0.997	0.953	0.896	0.922	0.939	1.063	0.966	1.144	0.966	1.219		0.963	0.934	0.986	0.923	0.989	1.11		0.87	0.401805	0.14	-0.21	0.85	0.84	0.332914	0.18	-0.25	0.74	0.89	0.326395	0.18	-0.17	0.73
1165	46577648	P61009	SPCS3	Signal peptidase complex subunit 3	180	20.3	8.62		1.071	1.216	1.08	1.103	0.745	1.081	1.147	1.119	1.088	1.061	0.843	0.932	1.119	0.951	1.041	0.934	1.215	0.987		1.122	0.976	1.118	0.945	1.037	1.045		1.07	0.116661	0.48	0.1	0.32	0.93	0.0745085	0.66	-0.1	0.18	1.07	0.124825	0.45	0.1	0.34
1166	54039634	P67812	SC11A	Signal peptidase complex catalytic subunit SEC11A	179	20.6	9.48		1.028	1.012	0.996	0.991	1.049	0.956	1.03	1	1.006	1.033	1.006	0.954	0.942	0.904	0.916	0.984	1.047	0.827		1.012	0.999	1.012	0.998	0.921	0.953		1.06	0.136603	0.42	0.09	0.38	1.05	0.0955192	0.55	0.07	0.26	1.06	0.13663	0.42	0.09	0.38
1167	132559	P04843	RPN1	Dolichyl-diphosphooligosaccharide--protein glycosyltransferase subunit 1	607	68.5	6.38		1.005	1.038	1.002	1.016	0.875	0.981	1.06	1.045	1.057	1.026	0.979	0.979	0.974	0.986	0.982	1.029	1	1.032		1.015	0.957	1.054	0.995	0.981	1.02		1	0.0612738	0.76	-0.01	0.12	0.94	0.276223	0.22	-0.09	0.66	1.03	0.792436	0.04	0.05	1.41
1168	9297108	P04844	RPN2	Dolichyl-diphosphooligosaccharide--protein glycosyltransferase subunit 2	631	69.2	5.69		1.007	1.023	0.978	1.026	0.759	1.006	1.053	1.037	1.04	1.045	0.99	0.983	0.984	0.946	0.973	1.017	0.989	1.017		1.003	0.931	1.043	1.006	0.968	1.008		0.99	0.0602561	0.77	-0.01	0.12	0.92	0.136297	0.42	-0.12	0.38	1.04	0.853811	0.03	0.05	1.54
1169	48428858	P61803	DAD1	Dolichyl-diphosphooligosaccharide--protein glycosyltransferase subunit DAD1	113	12.5	7.08		0.93	1.079	1.039	1.045	0.625	1.01	1.07	1.053	1.152	1.088	0.951	1.005	0.932	0.973	0.884	1.129	1.064	1.137		1.016	0.893	1.092	1.015	0.93	1.11		0.92	0.418137	0.13	-0.13	0.87	0.8	0.321739	0.19	-0.31	0.73	0.98	0.0736763	0.66	-0.02	0.18
1170	239938926	P39656	OST48	Dolichyl-diphosphooligosaccharide--protein glycosyltransferase 48 kDa subunit	456	50.8	6.55		0.832	0.968	0.95	0.973	0.671	0.98	0.988	1.048	0.993	1.025	0.957	0.953	0.981	1.032	0.994	1.094	0.946	1.252		0.917	0.874	1.01	0.978	1.002	1.097		0.84	0.404518	0.14	-0.26	0.85	0.8	0.342888	0.17	-0.33	0.76	0.92	0.150662	0.39	-0.12	0.41
1171	182676409	P46977	STT3A	Dolichyl-diphosphooligosaccharide--protein glycosyltransferase subunit STT3A	705	80.5	8.07		0.918	0.965	0.955	1.003	0.7	1.006	1.003	1.062	1.072	0.966	0.949	0.941	0.978	1.001	0.924	1.093	1.011	1.39		0.946	0.903	1.046	0.952	0.967	1.165		0.81	0.423041	0.13	-0.3	0.88	0.78	0.360689	0.16	-0.37	0.79	0.9	0.162333	0.37	-0.16	0.43
1172	74715800	Q8TCJ2	STT3B	Dolichyl-diphosphooligosaccharide--protein glycosyltransferase subunit STT3B	826	93.6	8.91		0.997	1.041	1.057	1.008	0.914	1.041	1.136	1.053	1.043	1.063	0.987	0.91	1.018	1.034	0.97	1.101	1.009	1.156		1.032	0.987	1.077	0.987	1.007	1.089		0.95	0.213751	0.29	-0.08	0.54	0.91	0.385338	0.15	-0.14	0.82	0.99	0.0556768	0.84	-0.02	0.08
1173	116242490	Q13724	MOGS	Mannosyl-oligosaccharide glucosidase	837	91.9	8.9		0.967	0.995	0.977	0.944	1.083	0.988	0.979	1.074	1	0.998	0.932	0.981	0.979	1.033	0.966	1.05	0.982	0.992		0.98	1.005	1.018	0.97	0.993	1.008		0.97	0.215299	0.28	-0.04	0.55	1	0.0504499	0.95	0	0.02	1.01	0.0583496	0.8	0.01	0.1
1174	74735614	Q07065	CKAP4	Cytoskeleton-associated protein 4	602	66	5.92		0.969	1.032	0.983	1.04	0.796	1.044	1.074	1.1	1.043	0.95	0.931	0.93	0.919	0.977	0.956	1.07	0.967	1.041		0.995	0.96	1.073	0.937	0.951	1.026		0.97	0.129882	0.44	-0.04	0.36	0.94	0.111479	0.49	-0.1	0.31	1.05	0.248106	0.25	0.06	0.6
1175	23822112	Q9P2E9	RRBP1	Ribosome-binding protein 1	1410	152.4	8.6		1.111	1.093	1.058	1.01	1.265	1.002	1.053	1.004	1.01	1.037	1.015	0.987	0.982	0.91	0.976	0.987	1.034	0.891		1.087	1.092	1.022	1.013	0.956	0.971		1.12	0.663635	0.06	0.16	1.21	1.13	0.22268	0.27	0.17	0.56	1.05	0.191026	0.32	0.07	0.5
1176	10720185	Q9Y4L1	HYOU1	Hypoxia up-regulated protein 1	999	111.3	5.22		0.908	0.99	0.988	1.012	0.704	1.006	1.005	1.049	1.039	0.979	0.969	0.947	0.974	1.019	0.983	1.057	0.972	1.089		0.962	0.907	1.031	0.965	0.992	1.04		0.93	0.381181	0.15	-0.11	0.82	0.87	0.216642	0.29	-0.2	0.54	0.99	0.0561937	0.83	-0.01	0.08
1177	18203497	Q9UBS4	DJB11	DnaJ homolog subfamily B member 11	358	40.5	6.18		1.02	1.06	1.019	1.038	0.917	1.097	1.109	1.078	1.058	0.968	0.917	0.901	0.903	0.943	0.945	0.999	0.906	1.013		1.033	1.017	1.082	0.929	0.931	0.973		1.06	0.34421	0.17	0.09	0.77	1.05	0.103161	0.51	0.06	0.29	1.11	0.774719	0.04	0.15	1.39
1178	73620807	Q13217	DNJC3	DnaJ homolog subfamily C member 3	504	57.5	6.15		0.978	0.969	0.962	0.972	0.787	0.971	0.978	1.018	0.991	0.973	0.962	0.979	1.038	0.947	0.986	1.087	1.032	1.048		0.97	0.91	0.996	0.972	0.99	1.056		0.92	0.993775	0.01	-0.12	2.15	0.86	0.566422	0.08	-0.21	1.08	0.94	0.777312	0.04	-0.08	1.39
1179	142981524	Q8IXB1	DJC10	DnaJ homolog subfamily C member 10	793	91	7.18		1.014	1.038	1.031	0.979	0.966	0.954	1.096	1.07	1.027	1.053	1.039	0.998	0.973	0.947	0.997	1.041	1.051	0.954		1.028	0.966	1.064	1.03	0.972	1.015		1.01	0.068115	0.71	0.02	0.15	0.95	0.308627	0.2	-0.07	0.71	1.05	0.242853	0.25	0.07	0.6
1180	119360	P14625	ENPL	Endoplasmin	803	92.4	4.84		0.9	1.014	0.971	1.022	0.729	1.014	1.069	1.117	1.084	0.999	0.959	0.946	0.97	1.006	0.981	1.065	0.994	1.07		0.962	0.922	1.09	0.968	0.986	1.043		0.92	0.448642	0.12	-0.12	0.92	0.88	0.211252	0.29	-0.18	0.54	1.04	0.344334	0.17	0.06	0.76
1181	54037162	Q14697	GANAB	Neutral alpha-glucosidase AB	944	106.8	6.14		0.92	1	0.982	1.03	0.788	1.028	1.062	1.072	1.06	0.957	0.911	0.94	0.944	1.078	0.938	1.105	0.958	1.261		0.967	0.949	1.065	0.936	0.987	1.108		0.87	0.310053	0.2	-0.2	0.71	0.86	0.244809	0.25	-0.22	0.6	0.96	0.0758943	0.65	-0.06	0.19
1182	116242499	P14314	GLU2B	Glucosidase 2 subunit beta	528	59.4	4.41		1.069	1.041	0.986	1.011	1.104	1.009	1.087	1.034	1.02	1.047	0.986	0.981	0.988	0.926	0.948	0.997	1.026	0.944		1.032	1.041	1.047	1.005	0.954	0.989		1.04	0.221937	0.28	0.06	0.56	1.05	0.238695	0.26	0.07	0.59	1.06	0.406656	0.14	0.08	0.85
1183	543920	P27824	CALX	Calnexin	592	67.5	4.6		0.929	1.046	0.973	1.005	0.829	1.01	1.044	1.048	1.063	1.015	0.957	0.919	0.999	0.995	0.97	1.098	1.027	1.08		0.983	0.948	1.051	0.964	0.988	1.068		0.92	0.502704	0.1	-0.12	1	0.89	0.42671	0.13	-0.17	0.89	0.98	0.114159	0.49	-0.02	0.31
1184	2507461	P30101	PDIA3	Protein disulfide-isomerase A3	505	56.7	6.35		0.997	1.009	0.98	1.007	0.907	1.006	1.09	1.072	1.038	1.005	0.988	0.976	0.972	0.964	0.991	1.02	1.012	0.938		0.995	0.974	1.066	0.99	0.976	0.99		1.01	0.0535454	0.85	0.01	0.07	0.98	0.0653845	0.72	-0.02	0.15	1.08	0.640625	0.07	0.11	1.19
1185	21264108	Q12907	LMAN2	Vesicular integral-membrane protein VIP36	356	40.2	6.95		0.934	0.951	1.013	1.12	0.725	1.078	1.12	1.061	1.032	0.971	0.926	0.943	0.94	1.1	0.993	1.077	1.015	1.164		0.966	0.974	1.071	0.947	1.011	1.085		0.89	0.605065	0.07	-0.17	1.14	0.9	0.126098	0.45	-0.16	0.35	0.99	0.0582504	0.79	-0.02	0.1
1186	22261801	P49257	LMAN1	Protein ERGIC-53	510	57.5	6.77		1.009	1.055	1.005	1.014	0.886	1.01	1.064	0.995	1.036	1.035	0.988	0.98	1.013	1.028	0.999	1.013	1.042	1.075		1.023	0.97	1.032	1.001	1.013	1.043		0.98	0.125014	0.45	-0.03	0.35	0.93	0.324584	0.18	-0.11	0.74	0.99	0.0679495	0.7	-0.02	0.16
1187	55977881	Q9HCU5	PREB	Prolactin regulatory element-binding protein	417	45.4	7.88		0.902	1.005	1.025	0.961	0.964	0.985	1.081	1.095	1.206	0.987	1.017	0.982	1	0.909	1.042	1.019	1.048	0.866		0.977	0.97	1.127	0.996	0.984	0.978		1	0.050023	1	0	0	0.99	0.052103	0.9	-0.01	0.05	1.15	0.519935	0.09	0.21	1.02
1188	14548013	Q9NR31	SAR1A	GTP-binding protein SAR1a	198	22.4	6.68		0.858	0.816	1.039	1.146	1.272	1.053	1.286	1.025	1.225	1.484	1.483	1.574	1.253	1.316	1.111	1.444	0.916	0.871		0.904	1.157	1.179	1.514	1.227	1.077		0.84	0.134333	0.43	-0.25	0.37	1.07	0.0681077	0.7	0.1	0.15	1.09	0.0779034	0.64	0.13	0.19
1189	152112287	O94979	SC31A	Protein transport protein Sec31A	1220	132.9	6.89		0.915	0.918	0.921	0.942	0.88	1.005	0.921	0.962	0.962	0.943	0.954	0.928	0.958	1.041	1.002	1.021	0.943	1.139		0.918	0.942	0.948	0.942	1.001	1.034		0.89	0.475103	0.11	-0.17	0.95	0.91	0.252177	0.25	-0.13	0.61	0.92	0.28323	0.22	-0.12	0.66
1190	20141794	Q15437	SC23B	Protein transport protein Sec23B	767	86.4	6.89		1.075	1.053	1.009	1.059	1.073	1.135	0.987	1.012	0.974	1.012	0.923	0.947	1.035	1.134	1.055	0.97	0.984	0.986		1.046	1.089	0.991	0.961	1.075	0.98		1.07	0.848683	0.03	0.09	1.51	1.11	0.981675	0.01	0.15	1.99	1.01	0.13779	0.42	0.02	0.38
1191	143811354	Q15436	SC23A	Protein transport protein Sec23A	765	86.1	7.08		0.945	0.988	1.004	0.968	0.841	1.005	0.998	0.961	1.077	0.92	0.961	0.963	0.981	1.002	1.034	0.989	0.95	1.002		0.979	0.938	1.012	0.948	1.006	0.98		1	0.0501922	0.97	0	0.01	0.96	0.120513	0.46	-0.06	0.33	1.03	0.128526	0.44	0.05	0.36
1192	160331913	O95486	SC24A	Protein transport protein Sec24A	1093	119.7	7.66		1.015	0.786	1.134	0.976	1.016	1.084	0.824	0.897	1.129	0.999	0.992	1.047	1.011	1.127	0.989	0.992	1.036	1.172		0.978	1.025	0.95	1.013	1.043	1.067		0.92	0.114158	0.49	-0.12	0.31	0.96	0.0984588	0.55	-0.06	0.26	0.89	0.180891	0.34	-0.17	0.47
1193	257051070	P53992	SC24C	Protein transport protein Sec24C	1094	118.2	7.06		0.97	1.002	0.998	1.066	0.862	1.042	0.942	1.055	1.072	0.973	0.994	0.997	0.954	0.986	1.014	0.935	0.935	0.881		0.99	0.99	1.023	0.988	0.985	0.917		1.08	0.892474	0.02	0.11	1.61	1.08	0.179886	0.34	0.11	0.47	1.12	0.594873	0.08	0.16	1.12
1194	215273909	O94855	SC24D	Protein transport protein Sec24D	1032	112.9	7.25		1.015	0.945	0.978	0.956	1.116	0.916	0.99	1.066	1.024	1.068	1.081	1.089	1.028	1.049	1.008	0.967	1.07	0.988		0.979	0.996	1.027	1.079	1.028	1.009		0.97	0.119832	0.47	-0.04	0.32	0.99	0.0538188	0.87	-0.02	0.06	1.02	0.073642	0.66	0.03	0.18
1195	224471872	Q9NYU2	UGGG1	UDP-glucose:glycoprotein glucosyltransferase 1	1555	177.1	5.63		0.971	0.999	1.01	1.015	0.915	0.969	1.07	1.02	1.044	1.042	1.017	0.991	0.993	0.944	0.975	1.021	0.988	1.032		0.993	0.966	1.044	1.017	0.971	1.013		0.98	0.190746	0.31	-0.03	0.5	0.95	0.286655	0.21	-0.07	0.67	1.03	0.319803	0.19	0.04	0.72
1196	119530	P13667	PDIA4	Protein disulfide-isomerase A4	645	72.9	5.07		0.992	1.022	1.003	1.032	0.8	1.03	1.095	1.093	1.068	0.997	0.983	0.964	0.974	0.952	0.966	1.031	1.006	1.009		1.006	0.954	1.085	0.981	0.964	1.016		0.99	0.128092	0.44	-0.01	0.36	0.94	0.119502	0.47	-0.09	0.33	1.07	0.999199	0	0.1	2.38
1197	2501205	Q15084	PDIA6	Protein disulfide-isomerase A6	440	48.1	5.08		0.907	0.989	0.928	0.997	0.699	0.979	1.014	1.043	1.038	0.995	0.927	0.947	0.977	0.929	0.935	1.025	0.99	0.988		0.941	0.892	1.031	0.956	0.947	1.001		0.94	0.530679	0.09	-0.09	1.04	0.89	0.186915	0.32	-0.17	0.49	1.03	0.463517	0.11	0.04	0.95
1198	6015110	P30040	ERP29	Endoplasmic reticulum resident protein 29	261	29	7.31		1.012	1.013	1.005	1.018	0.933	1.002	1.078	1.092	1.048	1.016	0.989	0.988	0.987	0.979	0.992	1.066	0.991	0.979		1.01	0.984	1.073	0.998	0.986	1.012		1	0.0505703	0.94	0	0.03	0.97	0.109668	0.5	-0.04	0.3	1.06	0.470703	0.12	0.08	0.94
1199	29839560	Q8NBS9	TXND5	Thioredoxin domain-containing protein 5	432	47.6	5.97		1.042	1.038	0.989	1.004	0.996	0.996	1.088	1.042	1.071	1.055	1.013	0.997	0.985	0.965	1.038	1.024	1.066	0.949		1.023	0.999	1.067	1.022	0.996	1.013		1.01	0.0573079	0.81	0.01	0.09	0.99	0.0678234	0.7	-0.02	0.16	1.05	0.283566	0.21	0.07	0.67
1200	50400608	Q96HE7	ERO1A	ERO1-like protein alpha	468	54.4	5.68		1.014	1.021	1.009	1.06	1.053	0.976	1.087	1.049	1.014	0.851	0.93	0.829	0.964	0.882	0.889	1.037	0.953	1.121		1.015	1.029	1.05	0.87	0.912	1.037		0.98	0.0719584	0.67	-0.03	0.17	0.99	0.0522182	0.9	-0.01	0.05	1.01	0.0564524	0.82	0.02	0.09
1201	3024310	Q13438	OS9	Protein OS-9	667	75.5	4.87		0.745	0.9	0.929	0.881	0.829	0.899	0.846	0.848	0.874	1.053	0.976	0.886	0.986	1.035	0.941	1.073	0.967	1.094		0.858	0.87	0.856	0.972	0.987	1.045		0.82	0.698278	0.06	-0.28	1.26	0.83	0.941204	0.02	-0.26	1.76	0.82	0.985779	0.01	-0.29	2.02
1202	74731510	Q96DZ1	ERLEC	Endoplasmic reticulum lectin 1	483	54.8	6.28		0.881	0.945	0.951	0.97	0.749	1.025	1.038	1.001	1.015	1.025	1.002	1.042	0.962	1.064	0.963	1.108	0.983	1.147		0.926	0.915	1.018	1.023	0.996	1.079		0.86	0.733628	0.05	-0.22	1.32	0.85	0.350692	0.17	-0.24	0.78	0.94	0.208109	0.29	-0.08	0.53
1203	22261821	P43307	SSRA	Translocon-associated protein subunit alpha	286	32.2	4.49		0.717	0.833	0.847	0.927	0.704	1	0.9	1.006	0.954	0.761	0.648	0.703	0.736	1.17	0.862	1.114	0.742	2.36		0.799	0.877	0.954	0.704	0.923	1.405		0.57	0.215867	0.28	-0.81	0.55	0.62	0.172731	0.35	-0.68	0.46	0.68	0.141949	0.41	-0.56	0.39
1204	9087205	Q9UNL2	SSRG	Translocon-associated protein subunit gamma	185	21.1	9.61		1.064	1.106	0.989	0.999	1.285	0.991	1.012	1.012	1.015	1.029	0.966	1.005	0.982	0.905	0.946	0.955	1.033	0.871		1.053	1.092	1.013	1	0.944	0.953		1.11	0.366918	0.16	0.14	0.8	1.15	0.232196	0.27	0.2	0.58	1.06	0.228966	0.27	0.09	0.57
1205	1711550	P51571	SSRD	Translocon-associated protein subunit delta	173	19	6.15		1.062	1.037	1.003	0.953	1.167	1.018	1.076	1.022	1.014	1.048	1	0.976	1.037	0.94	1.053	1.006	1.038	1.052		1.034	1.046	1.037	1.008	1.01	1.032		1	0.0508924	0.93	0	0.03	1.01	0.0549827	0.84	0.02	0.08	1.01	0.0547261	0.84	0.01	0.08
1206	1705725	P51572	BAP31	B-cell receptor-associated protein 31	246	28	8.44		1.014	1.049	1.003	1.022	0.787	1.025	1.087	1.09	1.041	1.025	0.974	0.987	0.984	0.969	0.997	1.072	1.031	1.025		1.022	0.945	1.073	0.995	0.983	1.043		0.98	0.166947	0.36	-0.03	0.44	0.91	0.212561	0.29	-0.14	0.54	1.03	0.2581	0.24	0.04	0.63
1207	18202507	Q15629	TRAM1	Translocating chain-associated membrane protein 1	374	43	9.63		1.059	0.998	0.916	0.844	1.656	0.885	1.13	1.018	0.95	1.044	1.111	1.02	1.136	1.024	1.14	1.16	1.132	1.09		0.991	1.129	1.032	1.058	1.1	1.127		0.88	0.768851	0.04	-0.19	1.37	1	0.0500061	1	0	0	0.92	0.354266	0.17	-0.13	0.78
1208	50400630	Q9BUN8	DERL1	Derlin-1	251	28.8	9.51		1.067	0.788	1.054	0.854	0.965	0.864	1.085	1.035	1.112	1.034	1.029	0.964	1.089	0.759	1.036	0.886	1.136	0.659		0.97	0.894	1.078	1.009	0.961	0.894		1.08	0.0727475	0.67	0.12	0.17	1	0.05	1	0	0	1.21	0.238969	0.26	0.27	0.59
1209	50400648	Q9GZP9	DERL2	Derlin-2	239	27.5	7.28		1.025	1.086	0.926	1.013	1.306	0.925	1.073	1.034	1.083	1.171	1.237	1.113	1.025	0.781	1.034	0.838	1.145	0.512		1.013	1.081	1.063	1.174	0.947	0.832		1.22	0.150121	0.39	0.28	0.41	1.3	0.194721	0.31	0.38	0.5	1.28	0.222752	0.28	0.35	0.56
1210	30913412	Q9BZV1	UBXN6	UBX domain-containing protein 6	441	49.7	6.89		1.073	1.162	1.014	0.991	0.875	1.057	0.981	0.998	1.032	1.071	1.024	1.035	1.025	1.07	1.147	0.968	1.012	0.963		1.083	0.974	1.003	1.043	1.08	0.981		1.1	0.543862	0.09	0.14	1.05	0.99	0.0517002	0.91	-0.01	0.04	1.02	0.162753	0.36	0.03	0.44
1211	41017512	Q9UNZ2	NSF1C	NSFL1 cofactor p47	370	40.5	5.1		0.977	1.011	0.986	1.032	1.022	0.975	0.979	0.971	0.993	1.018	1.028	1.037	1.019	1.016	1.054	0.944	1.006	0.913		0.991	1.01	0.981	1.028	1.03	0.954		1.04	0.225119	0.28	0.05	0.56	1.06	0.36613	0.16	0.08	0.79	1.03	0.150483	0.4	0.04	0.4
1212	6094447	P55072	TERA	Transitional endoplasmic reticulum ATPase	806	89.3	5.26		0.941	0.989	1.008	1.014	0.832	1.04	0.991	1.022	1.027	0.967	1.011	1.012	1.024	1.058	1.038	1.005	1.011	1.011		0.979	0.962	1.014	0.997	1.04	1.009		0.97	0.292351	0.2	-0.04	0.69	0.95	0.105714	0.51	-0.07	0.29	1	0.0704953	0.72	0.01	0.14
1213	50428974	Q8TAT6	NPL4	Nuclear protein localization protein 4 homolog	608	68.1	6.38		0.977	1	1.01	1.039	0.942	1.062	0.98	1.01	1.066	0.971	1.039	1.012	1.024	0.924	1.011	0.912	0.986	0.869		0.996	1.014	1.019	1.007	0.986	0.922		1.08	0.491833	0.11	0.11	0.97	1.1	0.403859	0.14	0.14	0.85	1.1	0.563045	0.09	0.14	1.07
1214	160332310	Q92890	UFD1	Ubiquitin fusion degradation protein 1 homolog	307	34.5	6.7		0.828	0.899	0.972	1.023	0.668	1.02	0.954	1.005	0.95	1.03	1.062	1.087	1.05	1.009	1.031	0.966	0.985	0.988		0.899	0.904	0.97	1.06	1.03	0.98		0.92	0.435178	0.13	-0.12	0.89	0.92	0.094709	0.55	-0.12	0.26	0.99	0.0797811	0.63	-0.01	0.2
1215	1706474	P31689	DNJA1	DnaJ homolog subfamily A member 1	397	44.8	7.08		0.951	0.984	1.051	1.039	0.955	1.021	0.96	0.924	0.93	1.011	1.038	1.013	1.043	0.984	1.048	0.999	1.033	0.941		0.995	1.005	0.938	1.021	1.025	0.991		1	0.0510746	0.93	0.01	0.03	1.01	0.0652785	0.72	0.02	0.14	0.95	0.400402	0.14	-0.08	0.85
1216	14916548	O60884	DNJA2	DnaJ homolog subfamily A member 2	412	45.7	6.48		0.958	0.97	1.003	1.052	0.798	1.102	0.952	1.012	1	0.97	1.009	1.006	1.006	1.026	1.019	0.983	1.012	0.965		0.977	0.984	0.988	0.995	1.017	0.987		0.99	0.0791658	0.63	-0.01	0.2	1	0.050106	0.98	0	0.01	1	0.0502035	0.96	0	0.02
1217	1706473	P25685	DNJB1	DnaJ homolog subfamily B member 1	340	38	8.63		0.866	0.901	1	0.951	0.963	0.987	0.937	0.945	0.999	0.964	0.977	1.012	0.992	1.028	1.017	0.99	0.994	0.931		0.922	0.967	0.96	0.984	1.012	0.972		0.95	0.184467	0.33	-0.08	0.48	1	0.0550646	0.85	-0.01	0.07	0.99	0.0694412	0.71	-0.02	0.15
1218	294862531	Q9NXW2	DJB12	DnaJ homolog subfamily B member 12	375	41.8	8.53		0.91	0.995	0.999	0.996	0.881	0.97	1.001	0.972	1.041	1.087	0.889	0.913	0.981	0.93	1.01	1.076	0.972	1.006		0.968	0.949	1.005	0.963	0.974	1.018		0.95	0.203004	0.3	-0.07	0.52	0.93	0.289519	0.21	-0.1	0.67	0.99	0.0635203	0.74	-0.02	0.13
1219	17865718	P08238	HS90B	Heat shock protein HSP 90-beta	724	83.2	5.03		0.935	0.967	1.02	1.015	0.827	1.017	0.939	0.991	0.995	0.967	1.003	1.011	1.014	1.056	1.011	0.985	0.974	0.997		0.974	0.953	0.975	0.994	1.027	0.985		0.99	0.0696978	0.68	-0.02	0.17	0.97	0.0774053	0.64	-0.05	0.19	0.99	0.0790863	0.63	-0.01	0.2
1220	2495344	Q92598	HS105	Heat shock protein 105 kDa	858	96.8	5.39		0.976	0.993	1.029	0.996	1.012	1.011	1.008	1.023	1.026	0.941	0.996	1.007	1.001	1.002	1.025	0.951	0.985	0.938		0.999	1.006	1.019	0.981	1.009	0.958		1.04	0.446228	0.12	0.06	0.93	1.05	0.832335	0.03	0.07	1.51	1.06	0.951863	0.02	0.09	1.82
1221	311033441	O95757	HS74L	Heat shock 70 kDa protein 4L	839	94.5	5.88		0.911	1.1	1.052	0.999	1.095	0.986	0.939	0.909	0.9	1.145	1.292	1.133	1.154	1.17	1.248	0.991	1.126	0.864		1.021	1.027	0.916	1.19	1.19	0.994		1.03	0.058713	0.79	0.04	0.1	1.03	0.0668951	0.71	0.05	0.15	0.92	0.162958	0.37	-0.12	0.43
1222	12229698	O95816	BAG2	BAG family molecular chaperone regulator 2	211	23.8	6.7		1.047	1.018	1.028	1.006	0.989	1.054	1.049	1.066	1.018	0.978	0.926	0.986	1.023	1.079	1.003	0.952	0.983	1.092		1.031	1.016	1.044	0.964	1.035	1.009		1.02	0.0777338	0.64	0.03	0.19	1.01	0.0523953	0.89	0.01	0.05	1.03	0.116327	0.48	0.05	0.32
1223	74734730	Q9NZL4	HPBP1	Hsp70-binding protein 1	362	39.4	5.21		1.05	1.046	0.922	0.968	1.017	0.977	0.815	0.935	0.928	0.859	0.974	0.88	0.983	0.918	0.964	0.843	0.905	0.78		1.006	0.987	0.893	0.904	0.955	0.843		1.19	0.767894	0.04	0.26	1.37	1.17	0.913115	0.02	0.23	1.68	1.06	0.146549	0.4	0.08	0.4
1224	108935868	Q9Y263	PLAP	Phospholipase A-2-activating protein	795	87.1	6.37		0.935	0.941	0.962	0.958	0.966	0.976	0.932	0.967	0.979	0.981	0.969	0.968	0.948	1.03	1	1.031	0.981	1.008		0.946	0.967	0.959	0.973	0.993	1.007		0.94	0.911844	0.02	-0.09	1.66	0.96	0.669613	0.06	-0.06	1.21	0.95	0.595034	0.08	-0.07	1.1
1225	124056593	Q9UHD9	UBQL2	Ubiquilin-2	624	65.7	5.22		0.915	0.936	1.015	1.062	0.761	1.159	1.006	1.055	0.993	0.932	1.014	0.962	0.956	0.965	0.894	0.96	0.995	1.183		0.955	0.994	1.018	0.969	0.938	1.046		0.91	0.207642	0.3	-0.13	0.53	0.95	0.0651148	0.73	-0.07	0.14	0.97	0.0662998	0.71	-0.04	0.15
1226	45476982	Q9NRR5	UBQL4	Ubiquilin-4	601	63.8	5.22		0.948	1.014	0.97	0.946	1.089	0.985	0.983	0.99	0.965	0.94	0.921	0.938	0.929	1.033	1.042	0.921	0.97	1.02		0.977	1.007	0.979	0.933	1.001	0.97		1.01	0.0543813	0.85	0.01	0.07	1.04	0.106088	0.52	0.05	0.29	1.01	0.0599256	0.77	0.01	0.11
1227	290457685	P54252	ATX3	Ataxin-3	364	41.8	4.91		0.895	0.791	0.908	0.869	0.859	0.782	0.808	0.902	0.888	0.897	0.95	0.923	0.856	0.953	0.88	0.853	0.92	0.831		0.864	0.837	0.866	0.923	0.896	0.868		1	0.0508169	0.94	-0.01	0.03	0.96	0.120747	0.46	-0.05	0.34	1	0.0502708	0.96	0	0.02
1228	24638295	O95155	UBE4B	Ubiquitin conjugation factor E4 B	1302	146.1	6.55		1.044	0.926	0.965	0.946	1.241	0.972	1.015	0.966	1.021	1.061	1.022	1.08	1.021	1.201	1.05	0.898	1.01	0.857		0.978	1.053	1.001	1.054	1.091	0.921		1.06	0.157243	0.38	0.09	0.42	1.14	0.222693	0.28	0.19	0.55	1.09	0.336615	0.18	0.12	0.74
1229	52000881	Q9Y385	UB2J1	Ubiquitin-conjugating enzyme E2 J1	318	35.2	6.74		1.02	1.066	0.985	0.949	1.096	0.959	0.949	0.897	0.885	0.987	1.052	0.961	0.996	1.021	1.033	1.035	1.119	0.885		1.023	1.001	0.911	1	1.017	1.013		1.01	0.0520368	0.89	0.01	0.05	0.99	0.0522145	0.89	-0.02	0.05	0.9	0.272449	0.22	-0.15	0.65
1230	51338681	P62253	UB2G1	Ubiquitin-conjugating enzyme E2 G1	170	19.5	5.3		0.994	1.1	0.948	0.928	0.978	0.999	1.007	1	1.13	0.713	0.735	0.739	0.793	0.94	0.809	0.889	0.714	1.039		1.014	0.968	1.046	0.729	0.847	0.88		1.15	0.230166	0.27	0.2	0.57	1.1	0.140812	0.41	0.14	0.38	1.19	0.329135	0.18	0.25	0.74
1231	45593583	P60604	UB2G2	Ubiquitin-conjugating enzyme E2 G2	165	18.6	4.7		0.962	0.849	0.945	1.04	1.001	0.941	0.926	0.895	0.974	0.917	1.05	0.882	0.938	0.995	1.145	1.071	1.058	1.143		0.919	0.994	0.931	0.95	1.026	1.091		0.84	0.939346	0.02	-0.25	1.76	0.91	0.629944	0.07	-0.13	1.17	0.85	0.981861	0.01	-0.23	1.98
1232	74751883	Q96GF1	RN185	E3 ubiquitin-protein ligase RNF185	192	20.4	6.52		1.046	1.071	1.101	1.037	1.025	0.909	1.002	1.104	0.959	1.084	1.186	1.054	1.049	0.96	0.98	1.15	1.008	0.896		1.073	0.99	1.022	1.108	0.996	1.018		1.05	0.107847	0.51	0.08	0.29	0.97	0.061864	0.76	-0.04	0.12	1	0.0502351	0.97	0.01	0.01
1233	62512184	Q9UBV2	SE1L1	Protein sel-1 homolog 1	794	88.7	5.39		1.099	1.066	0.971	1.012	1.048	0.947	1.057	1.057	1.069	0.974	0.992	0.92	0.928	0.987	0.985	0.975	0.938	1.03		1.045	1.002	1.061	0.962	0.967	0.981		1.07	0.253486	0.24	0.09	0.62	1.02	0.0798518	0.62	0.03	0.21	1.08	0.772382	0.04	0.11	1.37
1234	34922250	Q9UKV5	AMFR	E3 ubiquitin-protein ligase AMFR	643	72.9	6.39		0.802	1.149	0.967	1.02	1.194	0.969	0.869	1.166	0.977	1.099	1.114	0.993	1.054	0.923	1.054	1.033	1.073	0.936		0.973	1.061	1.004	1.069	1.01	1.014		0.96	0.0653861	0.72	-0.06	0.14	1.05	0.0877976	0.59	0.07	0.23	0.99	0.0511601	0.92	-0.01	0.04
1235	78099173	Q9UNE7	CHIP	E3 ubiquitin-protein ligase CHIP	303	34.8	5.87		1.167	1.07	1.022	0.964	1.209	1.007	1.035	1.053	1.003	1.069	1.085	1.03	1.102	1.007	1.147	1.02	1.035	0.973		1.086	1.06	1.03	1.061	1.085	1.009		1.08	0.342883	0.17	0.11	0.76	1.05	0.0963575	0.55	0.07	0.26	1.02	0.135099	0.42	0.03	0.38
1236	51338685	P62837	UB2D2	Ubiquitin-conjugating enzyme E2 D2	147	16.7	7.83		0.914	1.006	1.05	1.054	0.697	1.046	0.952	1.01	1.002	1.07	0.983	1.095	0.996	1.105	1.059	1.029	1.085	1.132		0.99	0.933	0.988	1.049	1.054	1.082		0.92	0.407419	0.14	-0.13	0.85	0.86	0.214043	0.29	-0.21	0.54	0.91	0.697942	0.05	-0.13	1.26
1237	46577654	P61077	UB2D3	Ubiquitin-conjugating enzyme E2 D3	147	16.7	7.8		1.132	1.092	1.066	0.999	1.188	1.045	1.043	1.018	1.046	0.733	0.843	1.019	1.024	1.201	0.974	1.042	0.908	1.002		1.096	1.078	1.036	0.865	1.066	0.984		1.11	0.648721	0.06	0.16	1.19	1.1	0.249386	0.25	0.13	0.6	1.05	0.227689	0.27	0.07	0.56
1238	1717857	P51965	UB2E1	Ubiquitin-conjugating enzyme E2 E1	193	21.4	8.53		0.997	0.931	0.985	0.965	1.316	0.978	1.049	1.007	0.974	0.947	1.105	1.089	1.072	1.015	1.059	0.987	1.057	0.991		0.971	1.087	1.01	1.047	1.049	1.012		0.96	0.24706	0.26	-0.06	0.59	1.07	0.0942245	0.56	0.1	0.25	1	0.0504322	0.96	0	0.02
1239	3041737	Q12846	STX4	Syntaxin-4	297	34.2	6.28		1.041	1.077	0.995	1.045	1.02	1.09	0.966	1.071	1.035	0.988	0.944	0.918	0.883	0.902	0.837	0.839	0.953	0.967		1.037	1.052	1.024	0.95	0.874	0.92		1.13	0.633003	0.07	0.17	1.17	1.14	0.758182	0.04	0.19	1.35	1.11	0.477782	0.11	0.16	0.96
1240	20532414	O15400	STX7	Syntaxin-7	261	29.8	5.55		1.073	1.038	0.982	1.027	1.03	1.031	1.062	1.053	1.064	1.075	1.023	0.977	0.989	0.941	0.995	1.02	0.994	0.921		1.031	1.029	1.06	1.025	0.975	0.978		1.05	0.243228	0.25	0.08	0.6	1.05	0.364959	0.16	0.07	0.8	1.08	0.71387	0.05	0.12	1.29
1241	114152881	Q13190	STX5	Syntaxin-5	355	39.6	9.16		0.96	0.895	0.955	0.953	0.885	0.948	0.902	1.045	0.934	1.032	0.99	0.963	0.909	1.012	0.981	1.038	1.004	1.113		0.936	0.929	0.961	0.995	0.967	1.052		0.89	0.788201	0.04	-0.17	1.41	0.88	0.820527	0.03	-0.18	1.47	0.91	0.353508	0.17	-0.13	0.78
1242	126302613	Q9UEU0	VTI1B	Vesicle transport through interaction with t-SNAREs homolog 1B	232	26.7	9.04		1.052	1.038	1.039	1.075	1.213	1.05	1.089	1.079	1.029	1.109	1.059	0.973	1.087	1.042	1.06	1.025	1.063	0.916		1.043	1.112	1.066	1.047	1.063	1.001		1.04	0.147772	0.4	0.06	0.4	1.11	0.342568	0.17	0.15	0.76	1.06	0.250871	0.25	0.09	0.6
1243	374095459	Q96AJ9	VTI1A	Vesicle transport through interaction with t-SNAREs homolog 1A	217	25.2	6.4		1.003	0.962	1.013	1.012	0.833	0.999	0.975	0.902	0.952	1.068	1.112	1.033	1.069	0.899	0.974	0.985	1.051	0.823		0.992	0.948	0.943	1.071	0.981	0.953		1.04	0.0838689	0.6	0.06	0.22	0.99	0.0503368	0.96	-0.01	0.02	0.99	0.0521102	0.9	-0.01	0.05
1244	22654242	O14653	GOSR2	Golgi SNAP receptor complex member 2	212	24.8	8.06		1.001	1.002	0.884	0.977	1.079	0.978	0.995	0.863	0.922	1.024	1.151	1.049	1.017	0.886	1.004	0.972	0.94	0.812		0.962	1.012	0.927	1.074	0.969	0.908		1.06	0.130637	0.43	0.08	0.36	1.11	0.37509	0.16	0.16	0.81	1.02	0.0600305	0.78	0.03	0.11
1245	93141310	Q12981	SEC20	Vesicle transport protein SEC20	228	26.1	8.95		1.136	1.046	1.004	0.945	1.164	0.96	1.158	1.028	0.97	1.085	1.052	0.982	1.027	0.829	0.977	0.906	1.024	0.795		1.062	1.023	1.052	1.04	0.944	0.908		1.17	0.465137	0.11	0.23	0.94	1.13	0.203885	0.3	0.17	0.52	1.16	0.347295	0.17	0.21	0.76
1246	6226190	O43752	STX6	Syntaxin-6	255	29.2	4.93		1.01	0.823	0.761	0.896	0.851	0.92	0.955	0.961	0.832	1.149	1.2	1.299	1.224	0.672	1.048	0.653	1.501	0.477		0.864	0.889	0.916	1.216	0.981	0.877		0.99	0.0501706	0.97	-0.02	0.01	1.01	0.0501529	0.97	0.02	0.01	1.04	0.0515943	0.91	0.06	0.04
1247	17368024	O60499	STX10	Syntaxin-10	249	28.1	4.89		0.975	0.834	0.965	0.805	0.879	0.962	0.763	1.029	0.817	1.076	1.052	0.997	1.002	1.115	0.973	1.01	1.028	1.078		0.925	0.882	0.869	1.042	1.03	1.039		0.89	0.565048	0.08	-0.17	1.08	0.85	0.8204	0.03	-0.24	1.47	0.84	0.473761	0.11	-0.26	0.95
1248	9297054	Q9UNK0	STX8	Syntaxin-8	236	26.9	4.98		1.125	1.101	1.019	1.027	0.841	1.022	1.049	1.167	1.05	0.964	1.167	1.06	1.123	1.228	1.171	1.164	1.167	1.26		1.082	0.963	1.088	1.063	1.174	1.197		0.9	0.6545	0.06	-0.15	1.2	0.8	0.869047	0.03	-0.31	1.56	0.91	0.522249	0.1	-0.14	1.01
1249	27805424	O15155	BET1	BET1 homolog	118	13.3	9.06		0.83	1.016	0.911	1.052	0.641	1.058	1.147	1.149	1.096	1.016	0.975	0.888	1.089	1.167	1.105	1.233	1.052	1.253		0.919	0.917	1.13	0.96	1.12	1.179		0.78	0.809411	0.04	-0.36	1.44	0.78	0.365952	0.16	-0.36	0.8	0.96	0.109182	0.5	-0.06	0.3
1250	6685971	O00161	SNP23	Synaptosomal-associated protein 23	211	23.3	5.01		1.002	1.005	1.002	1.033	1.079	0.972	0.984	1.041	1.039	1.005	1.027	1.002	0.988	0.911	0.971	1.027	1.009	0.936		1.003	1.028	1.021	1.011	0.956	0.991		1.01	0.0699148	0.68	0.02	0.17	1.04	0.135689	0.42	0.05	0.38	1.03	0.137026	0.41	0.04	0.39
1251	6685982	O95721	SNP29	Synaptosomal-associated protein 29	258	29	5.81		1.012	0.963	1.031	1.016	1.082	1.04	0.948	1.018	0.986	1.027	1.09	1.071	1.023	1.047	1.024	0.939	0.997	0.899		1.002	1.046	0.984	1.062	1.031	0.945		1.06	0.33568	0.18	0.08	0.75	1.11	0.766712	0.04	0.15	1.37	1.04	0.185935	0.33	0.06	0.48
1252	2501082	Q15836	VAMP3	Vesicle-associated membrane protein 3	100	11.3	8.79		0.995	0.988	0.989	0.989	1.152	0.986	1.083	1.048	1.03	1.06	1.061	1.015	0.988	0.917	1.041	0.958	1.059	0.829		0.99	1.042	1.054	1.045	0.982	0.949		1.04	0.0908443	0.57	0.06	0.25	1.1	0.176625	0.34	0.14	0.47	1.11	0.304581	0.2	0.15	0.7
1253	1723133	P51809	VAMP7	Vesicle-associated membrane protein 7	220	24.9	8.6		1.057	0.985	0.987	1.013	0.979	0.987	0.95	1.017	0.992	0.922	0.962	0.922	0.95	0.861	0.816	1.02	0.96	0.869		1.01	0.993	0.986	0.935	0.876	0.95		1.06	0.207637	0.3	0.09	0.53	1.05	0.148912	0.39	0.06	0.41	1.04	0.110721	0.49	0.05	0.31
1254	74735365	O15498	YKT6	Synaptobrevin homolog YKT6	198	22.4	6.92		0.983	0.986	1.016	1.011	0.832	1.03	0.988	1.095	1.053	0.996	1.016	1.003	1.048	1.088	1.049	1.055	0.958	0.996		0.995	0.958	1.045	1.005	1.062	1.003		0.99	0.0575333	0.81	-0.01	0.09	0.96	0.0957515	0.55	-0.07	0.26	1.04	0.158722	0.37	0.06	0.43
1255	317373544	O75396	SC22B	Vesicle-trafficking protein SEC22b	215	24.6	6.92		0.977	1.002	1.023	1.006	0.975	1.01	1.067	1.085	1.057	1.064	1.048	1.037	1.024	0.999	1.038	1.015	1.055	1		1	0.997	1.07	1.05	1.021	1.023		0.98	0.179099	0.34	-0.03	0.46	0.97	0.237665	0.25	-0.04	0.6	1.05	0.656102	0.07	0.06	1.18
1256	24418865	P22314	UBA1	Ubiquitin-like modifier-activating enzyme 1	1058	117.8	5.76		0.989	0.988	1.021	1.008	0.907	1.027	1.012	1.013	1.067	0.935	1.005	1.028	1.04	1.022	1.04	0.949	1.004	0.946		0.999	0.981	1.031	0.989	1.034	0.966		1.03	0.298693	0.21	0.05	0.68	1.01	0.0638195	0.75	0.02	0.12	1.07	0.630228	0.07	0.09	1.16
1257	42559897	Q9UBE0	SAE1	SUMO-activating enzyme subunit 1	346	38.4	5.3		1.04	0.923	1.016	1	1.074	0.976	0.989	0.974	0.997	0.985	1.026	1.037	1.045	1.029	1.066	1.025	0.978	0.988		0.993	1.017	0.987	1.016	1.047	0.997		1	0.0511543	0.92	-0.01	0.04	1.02	0.0901225	0.58	0.03	0.23	0.99	0.093163	0.55	-0.02	0.26
1258	42559898	Q9UBT2	SAE2	SUMO-activating enzyme subunit 2	640	71.2	5.29		1.068	1.014	1.005	1.044	1.148	1.069	1.046	0.975	1.011	1	1.013	1.042	1.05	1.056	1.034	0.998	0.966	0.963		1.029	1.087	1.011	1.018	1.047	0.976		1.05	0.582594	0.08	0.08	1.1	1.11	0.856954	0.03	0.16	1.54	1.04	0.292717	0.21	0.05	0.68
1259	83305811	Q8TBC4	UBA3	NEDD8-activating enzyme E1 catalytic subunit	463	51.8	5.45		1.038	1.043	1.097	1.071	0.762	1.013	1.001	0.972	1.027	0.876	0.963	0.995	0.975	0.979	0.984	0.923	0.877	0.963		1.059	0.948	1	0.945	0.979	0.921		1.15	0.975791	0.01	0.2	1.94	1.03	0.0581042	0.8	0.04	0.1	1.09	0.692732	0.06	0.12	1.26
1260	121949450	A0AVT1	UBA6	Ubiquitin-like modifier-activating enzyme 6	1052	117.9	6.14		0.941	0.96	0.978	1.038	0.806	1.002	0.934	1.015	1	0.971	1.011	1.059	1.066	1.034	1.081	0.99	1.026	1.006		0.96	0.949	0.983	1.013	1.06	1.008		0.95	0.83319	0.03	-0.07	1.48	0.94	0.121102	0.47	-0.09	0.33	0.98	0.14335	0.41	-0.04	0.38
1261	3915178	O00762	UBE2C	Ubiquitin-conjugating enzyme E2 C	179	19.6	7.37		1.056	1.021	1.125	1.082	0.951	0.993	0.847	0.936	0.975	0.909	0.95	0.913	0.901	1.066	1.004	0.955	0.91	1.149		1.067	1.009	0.919	0.924	0.99	1.005		1.06	0.115955	0.48	0.09	0.32	1	0.0502482	0.96	0.01	0.02	0.92	0.16819	0.36	-0.13	0.44
1262	54039805	P68036	UB2L3	Ubiquitin-conjugating enzyme E2 L3	154	17.9	8.51		0.971	0.956	0.956	0.954	1.078	1.005	0.885	0.964	1.007	0.949	0.947	0.959	1.022	1.126	1.078	1.02	0.961	1.279		0.961	1.012	0.952	0.952	1.075	1.087		0.88	0.23064	0.27	-0.18	0.57	0.93	0.106126	0.51	-0.1	0.29	0.88	0.233343	0.27	-0.19	0.58
1263	46577655	P61081	UBC12	NEDD8-conjugating enzyme Ubc12	183	20.9	7.69		1.026	0.97	1.013	0.965	1.056	1.009	0.943	0.989	1.046	1.01	1.075	1.046	1.05	1.05	1.075	0.965	0.977	0.933		1.003	1.01	0.992	1.044	1.058	0.958		1.05	0.498427	0.1	0.07	0.99	1.05	0.382251	0.15	0.08	0.82	1.04	0.168725	0.35	0.05	0.45
1264	209572710	Q9C0C9	UBE2O	E2/E3 hybrid ubiquitin-protein ligase UBE2O	1292	141.2	5.12		0.912	0.907	0.965	0.945	0.836	0.921	0.887	0.893	0.916	0.951	1.047	0.963	1.005	0.956	1.007	0.878	0.95	0.881		0.928	0.901	0.899	0.987	0.989	0.903		1.03	0.125518	0.45	0.04	0.35	1	0.0502588	0.96	0	0.02	1	0.0527034	0.88	-0.01	0.06
1265	74750234	Q7Z7E8	UB2Q1	Ubiquitin-conjugating enzyme E2 Q1	422	46.1	5.1		0.9	0.953	1.063	0.999	0.871	1.026	0.972	0.937	0.976	0.973	1.034	1.036	1.068	0.975	1.089	0.927	0.951	0.87		0.972	0.966	0.962	1.014	1.044	0.916		1.06	0.168473	0.35	0.09	0.45	1.05	0.144908	0.41	0.08	0.39	1.05	0.358999	0.17	0.07	0.78
1266	74749761	Q712K3	UB2R2	Ubiquitin-conjugating enzyme E2 R2	238	27.1	4.42		1.087	0.955	0.983	1.024	1.051	1.009	0.888	0.978	0.948	0.945	1.025	1.059	0.999	0.969	1.053	0.931	1.013	0.933		1.009	1.028	0.938	1.009	1.007	0.959		1.05	0.166193	0.36	0.07	0.44	1.07	0.577184	0.08	0.1	1.09	0.98	0.0831882	0.61	-0.03	0.21
1267	2507505	P49427	UB2R1	Ubiquitin-conjugating enzyme E2 R1	236	26.7	4.54		0.84	0.954	1.048	0.979	0.655	1.138	0.812	0.996	0.919	0.997	1.112	1.047	1.044	0.966	1.065	0.865	1.082	0.839		0.947	0.924	0.909	1.052	1.025	0.929		1.02	0.0536186	0.86	0.03	0.07	1	0.0501019	0.98	-0.01	0.01	0.98	0.0548612	0.84	-0.03	0.07
1268	134035344	Q9H832	UBE2Z	Ubiquitin-conjugating enzyme E2 Z	354	38.2	5.62		1.023	0.977	1.021	0.999	0.811	0.993	0.969	0.98	1.082	0.995	0.999	1.049	1.068	1.108	1.03	0.974	0.979	1.061		1.007	0.935	1.01	1.014	1.069	1.005		1	0.0504175	0.95	0	0.02	0.93	0.165905	0.36	-0.1	0.44	1.01	0.0512752	0.91	0.01	0.04
1269	46577658	P61086	UBE2K	Ubiquitin-conjugating enzyme E2 K	200	22.4	5.44		0.838	0.919	1.055	0.957	1.004	1.07	1.009	1.109	0.985	0.911	0.911	0.972	1.001	1.105	1.017	0.993	0.915	1.191		0.937	1.01	1.034	0.932	1.041	1.033		0.91	0.143092	0.41	-0.14	0.39	0.98	0.0572221	0.81	-0.03	0.09	1	0.050013	0.99	0	0
1270	215274240	Q05086	UBE3A	Ubiquitin-protein ligase E3A	875	100.6	5.22		0.987	0.978	1.012	0.985	1.049	0.984	0.964	0.945	1.049	0.966	1.033	0.949	0.977	0.929	0.988	0.921	1.033	0.859		0.992	1.006	0.986	0.983	0.965	0.937		1.06	0.172162	0.35	0.08	0.46	1.07	0.219679	0.28	0.1	0.55	1.05	0.121981	0.47	0.07	0.33
1271	67462009	Q15386	UBE3C	Ubiquitin-protein ligase E3C	1083	123.8	6.71		0.866	0.967	0.904	0.977	0.651	0.922	0.833	0.976	0.944	0.939	1.121	1.054	1.139	1.012	0.959	1.06	1.162	0.657		0.912	0.85	0.918	1.038	1.037	0.959		0.95	0.0595824	0.78	-0.07	0.11	0.89	0.0877158	0.58	-0.17	0.23	0.96	0.0569991	0.81	-0.06	0.09
1272	37537897	Q96J02	ITCH	E3 ubiquitin-protein ligase Itchy homolog	903	102.7	6.3		1.085	0.898	0.956	0.915	1.164	0.993	0.857	0.906	0.876	1.04	1.089	1.052	1.056	1.081	1.012	1.029	0.982	1.002		0.98	1.024	0.88	1.06	1.049	1.004		0.98	0.0690551	0.69	-0.04	0.16	1.02	0.0576392	0.81	0.03	0.09	0.88	0.999746	0	-0.19	2.5
1273	32171765	O00308	WWP2	NEDD4-like E3 ubiquitin-protein ligase WWP2	870	98.9	7.12		1.104	1.042	1.016	1.029	1.093	1.002	1.034	0.858	0.966	0.993	1.04	1.028	1.107	0.971	1.052	1.001	0.978	0.959		1.054	1.042	0.952	1.02	1.044	0.979		1.08	0.66987	0.06	0.11	1.22	1.06	0.508408	0.1	0.09	0.98	0.97	0.0782415	0.63	-0.04	0.2
1274	2499839	Q14669	TRIPC	E3 ubiquitin-protein ligase TRIP12	1992	220.3	8.48		1.022	0.994	0.994	0.982	1.122	0.969	0.974	0.959	0.993	1	0.988	1.002	0.969	0.925	0.975	0.97	1.017	0.879		1.003	1.024	0.975	0.997	0.956	0.955		1.05	0.195241	0.31	0.07	0.51	1.07	0.178343	0.34	0.1	0.47	1.02	0.0747096	0.65	0.03	0.19
1275	313104311	P46934	NEDD4	E3 ubiquitin-protein ligase NEDD4	1319	149	6.58		1.034	1.024	0.998	1.051	0.732	1.023	0.943	0.912	1.004	0.914	1.014	1.028	1.013	1.047	1.053	0.995	0.945	0.924		1.019	0.935	0.953	0.985	1.038	0.955		1.07	0.701558	0.05	0.09	1.27	0.98	0.0539346	0.86	-0.03	0.06	1	0.0503631	0.96	0	0.02
1276	73921204	Q96PU5	NED4L	E3 ubiquitin-protein ligase NEDD4-like	975	111.9	5.82		0.92	0.89	0.97	0.909	0.959	1.052	1.021	0.886	0.9	1.054	1.016	1.052	0.989	0.996	0.993	0.969	0.957	1.082		0.927	0.973	0.935	1.041	0.993	1.002		0.92	0.333368	0.17	-0.11	0.76	0.97	0.0770361	0.64	-0.04	0.19	0.93	0.192877	0.32	-0.1	0.5
1277	73915353	Q7Z6Z7	HUWE1	E3 ubiquitin-protein ligase HUWE1	4374	481.6	5.22		0.955	0.954	0.989	1.006	0.856	1.009	0.978	1.016	0.989	0.952	0.981	1.009	1.004	1.05	0.958	0.988	0.976	0.965		0.966	0.957	0.994	0.98	1.004	0.977		0.99	0.124341	0.47	-0.02	0.32	0.98	0.0665067	0.72	-0.03	0.14	1.02	0.233272	0.25	0.03	0.61
1278	308153453	O95714	HERC2	E3 ubiquitin-protein ligase HERC2	4834	526.9	6.28		1.152	0.949	0.98	1.029	1.241	1.021	0.929	1.007	1.009	0.913	0.823	0.964	0.972	0.924	0.865	0.866	0.771	0.993		1.027	1.097	0.982	0.9	0.92	0.877		1.17	0.346393	0.17	0.23	0.77	1.25	0.56081	0.08	0.32	1.07	1.12	0.296627	0.2	0.16	0.69
1279	74707832	Q5GLZ8	HERC4	Probable E3 ubiquitin-protein ligase HERC4	1057	118.5	6.19		0.96	1.018	0.918	1.003	0.962	1.078	0.987	0.948	1.071	1.008	1.016	0.952	1.01	1	0.9	1.02	0.841	1.1		0.965	1.014	1.002	0.992	0.97	0.987		0.98	0.0577124	0.81	-0.03	0.09	1.03	0.0611099	0.76	0.04	0.12	1.02	0.0533426	0.86	0.02	0.06
1280	71164791	Q14139	UBE4A	Ubiquitin conjugation factor E4 A	1066	122.5	5.24		0.816	0.901	0.929	0.966	0.747	0.896	0.866	0.896	0.962	0.842	0.907	0.984	0.97	1.036	0.949	1.013	0.853	1.186		0.882	0.87	0.908	0.911	0.985	1.017		0.87	0.240559	0.26	-0.21	0.59	0.85	0.225317	0.27	-0.23	0.57	0.89	0.178744	0.34	-0.16	0.47
1281	23813917	Q13356	PPIL2	Peptidyl-prolyl cis-trans isomerase-like 2	520	58.8	8.78		1.057	0.911	0.997	0.858	1.144	0.847	0.9	0.868	0.91	0.982	1.079	0.946	0.969	0.88	0.839	1.008	1.128	0.902		0.988	0.95	0.893	1.002	0.896	1.013		0.98	0.0610326	0.77	-0.04	0.11	0.94	0.0811172	0.62	-0.09	0.21	0.88	0.394033	0.15	-0.18	0.84
1282	251757253	P22681	CBL	E3 ubiquitin-protein ligase CBL	906	99.6	6.54		1.307	1.458	1.171	1.241	1.087	1.33	1.335	1.131	1.349	1.153	1.113	1.119	1.07	1.139	1.186	1.035	1.09	1.163		1.312	1.219	1.272	1.128	1.132	1.096		1.2	0.595443	0.08	0.26	1.12	1.11	0.304543	0.2	0.15	0.7	1.16	0.537234	0.09	0.21	1.04
1283	215274219	P29590	PML	Protein PML	882	97.5	6.21		0.969	1.012	0.955	0.992	1.025	0.932	1.024	0.965	1.003	0.954	0.942	0.941	0.939	1	0.97	0.987	1.022	1.003		0.979	0.983	0.997	0.945	0.97	1.004		0.98	0.221621	0.28	-0.04	0.55	0.98	0.106527	0.52	-0.03	0.28	0.99	0.063091	0.76	-0.01	0.12
1284	20178303	Q13049	TRI32	E3 ubiquitin-protein ligase TRIM32	653	71.9	6.98		1.12	1.101	1.076	1.047	1.183	1.034	0.948	0.946	0.854	0.897	0.898	1.008	0.833	0.73	0.751	0.716	0.873	0.675		1.099	1.088	0.916	0.934	0.772	0.755		1.46	0.998204	0.01	0.54	2.3	1.44	0.971239	0.01	0.53	1.92	1.21	0.593543	0.08	0.28	1.12
1285	19863260	Q13617	CUL2	Cullin-2	745	86.9	6.92		1.01	0.962	1.012	1.053	0.958	0.971	0.998	0.985	0.955	0.997	0.998	1.037	1.022	1.041	1.015	0.981	1.002	1.082		0.995	0.994	0.979	1.011	1.026	1.022		0.97	0.115012	0.49	-0.04	0.31	0.97	0.0961896	0.55	-0.04	0.26	0.96	0.231427	0.27	-0.06	0.56
1286	32699511	Q15369	ELOC	Transcription elongation factor B polypeptide 1	112	12.5	4.78		1.022	1.032	1.115	1.133	1.027	1.065	0.969	0.939	1.189	0.969	0.996	0.917	1.232	1.346	1.392	1.344	1.089	1.323		1.056	1.075	1.032	0.961	1.323	1.252		0.84	0.553067	0.09	-0.25	1.06	0.86	0.471488	0.11	-0.22	0.95	0.82	0.440624	0.13	-0.28	0.9
1287	32699512	Q15370	ELOB	Transcription elongation factor B polypeptide 2	118	13.1	4.88		0.878	0.89	0.974	1.041	0.674	1.115	0.905	1.112	1.023	0.898	0.868	0.931	0.932	1.125	1.042	0.997	0.943	1.363		0.914	0.943	1.013	0.899	1.033	1.101		0.83	0.257303	0.24	-0.27	0.62	0.86	0.125192	0.45	-0.22	0.34	0.92	0.0897305	0.58	-0.12	0.24
[truncated: 3,023 more rows]
[truncated: 37 more columns]

## Sheet: Supplemental Table 2 
Supplemental Table 2. Pathway annotation in Poochon database and calculation of coverage percentage
[truncated: 188 more rows]

[truncated: 3 more sheets: Supplemental Table 3 , Supplemental Table 4, Supplemental Table 5]
